# Supplementary material for: Transcriptome profiling reveals Silibinin dose-dependent response network in non-small lung cancer cells
Source: PeerJ journal article supplement (doi:10.7717/peerj.10373), 2020-12-16
Supplement: Figure_S2.pdf [file Figure_S2.pdf]

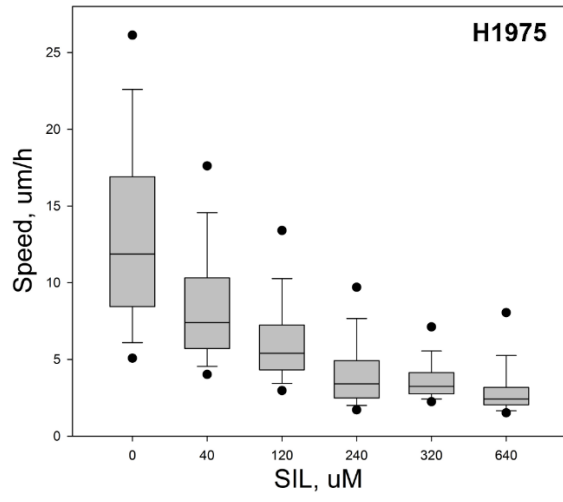

(a)

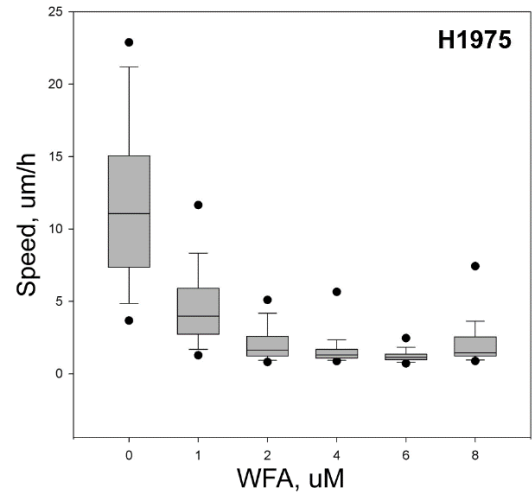

(b)
