# Supplementary material for: Transcriptome profiling reveals Silibinin dose-dependent response network in non-small lung cancer cells
Source: PeerJ journal article supplement (doi:10.7717/peerj.10373), 2020-12-16

H1975, untreated

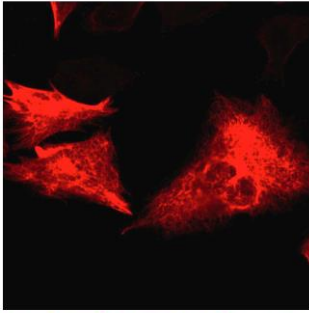

H1975, WFA 6uM

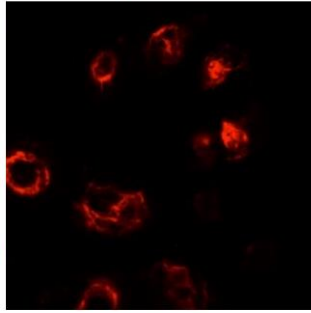

H1975, SIL 640 uM

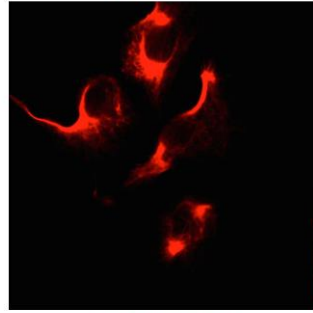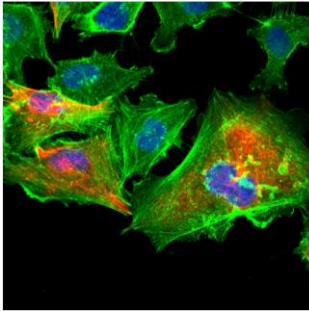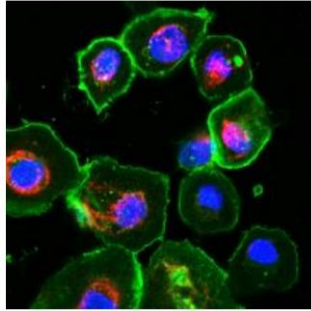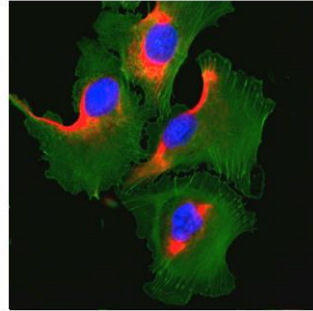

Supplement: Figure_S3.pdf [file Figure_S3.pdf]
