# Supplementary material for: Transcriptome profiling reveals Silibinin dose-dependent response network in non-small lung cancer cells
Source: PeerJ journal article supplement (doi:10.7717/peerj.10373), 2020-12-16

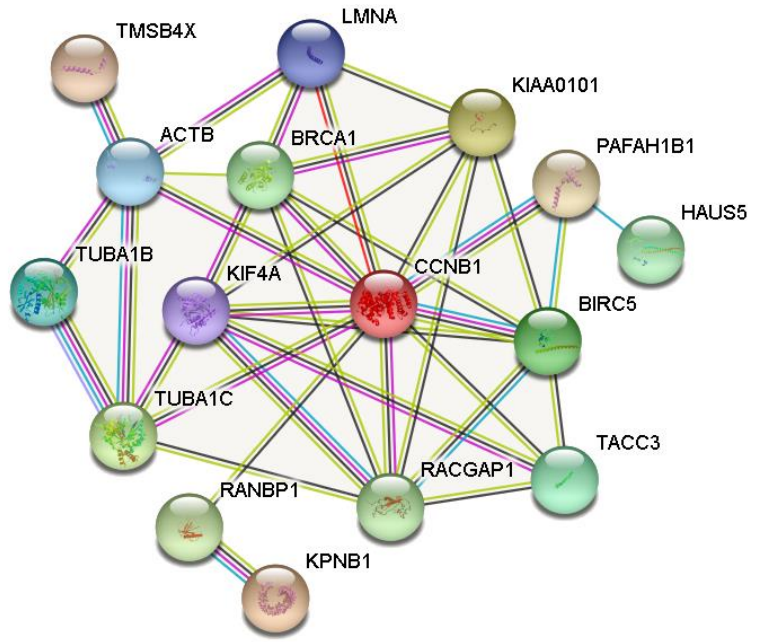

Supplement: Figure_S4.pdf [file Figure_S4.pdf]
