# Supplementary material for: Transcriptome profiling reveals Silibinin dose-dependent response network in non-small lung cancer cells
Source: PeerJ. 2020 Dec 16;8:e10373. doi: 10.7717/peerj.10373 (PMC7749657; doi:10.7717/peerj.10373)
Supplement: Supplemental Information 1 — Raw data of CTB IC50 measurements of five NSCLC cell lines (H1650, H1975, A549, H838, H2030) as well as their ranking according to the EMT gene signature from Byers et al 2013 and its correlation with the pattern of normalized SIL/WFA IC50 values. [file peerj-08-10373-s001.xlsx]

## Sheet: EMT_IC50_corr
	SIL IC50 normalized values and ranks of five NSCLC cell lines
				SIL, IC50 values			Rank of SIL IC50 amoung 5 NSCLC lines
		H1650	H1975	A549	H838	H2030	H1650	H1975	A549	H838	H2030
		0.56	1	0.86	0	0.71	4	1	2	5	3
	WFA IC50 normalized values and ranks of five NSCLC cell lines
				WFA, IC50 values			Rank of WFA IC50 amoung 5 NSCLC lines
		H1650	H1975	A549	H838	H2030	H1650	H1975	A549	H838	H2030
		0	0.18	0.44	0.35	1	5	4	2	3	1
	Correlation of the EMT gene signature from (Byers et al. 2013) with the pattern of normalized SIL/WFA IC50 values in five NSCLC cell lines. Transcriptomic data of NSCLC cells are taken from gene expression from GSE47206 (El-Chaar et al., 2014).
	The rank order of EMT genes (CDH1 -> ZEB1) and intrinsic EMT stage of NSCLC cell lines (H1650 -> H2030) is defined by the correlation with E-cadherin (CDH1).
				Gene experession (GE)				Rank of GE among 5 NSCLC lines				GE-IC50 Spearman corr.		GE-IC50 Spearman corr., abs		GE-IC50 Spearman corr., p-val
	Gene symbol	H1650	H1975	A549	H838	H2030	H1650	H1975	A549	H838	H2030	SIL	WFA	SIL	WFA	SIL	WFA
	ZEB1	5.63	133.98	262.89	672.48	286.66	5	4	2	1	2	-0.3	0.8	0.3	0.8	0.64	0.13		Mesenchymal genes
	VIM	2147.38	13231.7	11979.7	12955.4	15353.9	5	2	4	3	1	0.3	0.6	0.3	0.6	0.62	0.28
	AXL	323.23	347.57	863.77	574	873.45	5	4	2	3	1	0.1	1	0.1	1	0.87	1.3e-08
	MMP2	1178.16	61.41	132.21	35.29	45.82	1	3	2	5	4	0.3	-0.5	0.3	0.5	0.62	0.39
	NRP1	199.42	786.14	871.83	82.33	1281.89	4	3	2	5	1	0.6	0.7	0.6	0.7	0.28	0.19
	TGFBI	9470.76	14409.1	13316.6	10564.1	3921.71	4	1	2	3	5	0.6	-0.3	0.6	0.3	0.28	0.62
	PPARG	747.99	430.98	338.97	386.85	121.46	1	2	4	3	5	-0.1	-1	0.1	1	0.87	1.3e-08
	FN1	2475.96	5463.42	7042.3	5871.2	244.01	4	3	1	2	5	0.1	0	0.1	0	0.87	1
	HNMT	22	446.64	72.93	509.98	66.95	5	2	3	1	4	0	0.1	0	0.1	1	0.87
	RBPMS	216.06	353.28	572.22	122.11	324.62	4	2	1	5	3	0.9	0.3	0.9	0.3	0.037	0.62
	TNFRSF21	1598.09	1623.1	1059.81	1152.13	725.46	2	1	4	3	5	0.2	-0.9	0.2	0.9	0.75	0.037
	SSH3	219.88	794.58	117.44	357.42	213.58	3	1	5	2	4	0	-0.6	0	0.6	1	0.28
	MUC1	544.28	2322.67	49.25	617.88	661.42	4	1	5	3	2	0.3	0	0.3	0	0.62	1
	EPPK1	5.01	128.77	11.79	7.51	62.96	5	1	3	4	2	0.8	0.4	0.8	0.4	0.1	0.5
	EPN3	105.21	100.37	4.06	2.31	13.95	1	2	4	5	3	0.3	-0.6	0.3	0.6	0.62	0.28
	PRSS22	267.26	187.06	7.28	11.74	11.46	1	2	5	3	4	-0.2	-0.9	0.2	0.9	0.75	0.037
	AP1M2	981.13	523.67	691.43	3610.62	1306.3	3	5	4	1	2	-0.9	0.3	0.9	0.3	0.037	0.62
	SH3YL1	1115.01	1429.9	369.51	67.56	107.63	2	1	3	5	4	0.7	-0.6	0.7	0.6	0.19	0.28
	EVPL	226.06	277.48	147.84	23.99	110.33	2	1	3	5	4	0.7	-0.6	0.7	0.6	0.19	0.28
	FXYD3	526.85	107.13	20.86	37.56	66.53	1	2	5	4	3	0	-0.7	0	0.7	1	0.19
	CLDN4	522.33	839.84	5.12	7.46	3.9	2	1	4	3	5	0.2	-0.9	0.2	0.9	0.75	0.037
	MAPK13	537.13	725.9	20.86	81.79	71.2	2	1	5	3	4	0.1	-0.8	0.1	0.8	0.87	0.1
	EPPK1	5.01	128.77	11.79	7.51	62.96	5	1	3	4	2	0.8	0.4	0.8	0.4	0.1	0.5
	GALNT3	1351.33	738.56	6.53	10.8	25.32	1	2	5	4	3	0	-0.7	0	0.7	1	0.19
	STAP2	265.79	657.6	13.26	48.97	24.68	2	1	5	3	4	0.1	-0.8	0.1	0.8	0.87	0.1
	AP1M2	981.13	523.67	691.43	3610.62	1306.3	3	5	4	1	2	-0.9	0.3	0.9	0.3	0.037	0.62
	DSP	6086.6	4790.21	4081.13	536.25	310.33	1	2	3	4	5	0.2	-0.9	0.2	0.9	0.75	0.037
	ELMO3	159.41	1197.1	42.67	38.89	753.47	3	1	4	5	2	0.7	-0.1	0.7	0.1	0.19	0.87
	F11R	74.45	103.81	28.65	26.51	11.73	2	1	3	4	5	0.5	-0.8	0.5	0.8	0.39	0.1
	GPR56	903.56	726.06	581.62	326.8	21	1	2	3	4	5	0.2	-0.9	0.2	0.9	0.75	0.037
	BSPRY	70.55	174.63	6.87	2.31	1.27	2	1	3	4	5	0.5	-0.8	0.5	0.8	0.39	0.1
	C1ORF116	120.26	204.22	44.71	4.18	2.6	2	1	3	4	5	0.5	-0.8	0.5	0.8	0.39	0.1
	S100A14	4978.35	214.14	2.75	83.28	17.6	1	2	5	3	4	-0.2	-0.9	0.2	0.9	0.75	0.037
	SPINT2	8233.77	3016.92	2716.03	113.31	2498.67	1	2	3	5	4	0.4	-0.7	0.4	0.7	0.5	0.19
	ST14	943.62	649.9	30.93	15.59	8.57	1	2	3	4	5	0.2	-0.9	0.2	0.9	0.75	0.037
	GRHL2	703.11	485.09	8.23	3.17	7.56	1	2	3	5	4	0.4	-0.7	0.4	0.7	0.5	0.19
	PRR5	89.56	175.32	145.16	81.2	47.68	3	1	2	4	5	0.7	-0.5	0.7	0.5	0.19	0.39
	BSPRY	70.55	174.63	6.87	2.31	1.27	2	1	3	4	5	0.5	-0.8	0.5	0.8	0.39	0.1
	TJP3	152.59	142.05	33.39	63.67	13.41	1	2	4	3	5	-0.1	-1	0.1	1	0.87	1.3e-08
	TACSTD2	4624.24	2519.66	11.63	517.86	10.58	1	2	4	3	5	-0.1	-1	0.1	1	0.87	1.3e-08
	CDH3	5085.52	4659.3	1.7	40.69	16.81	1	2	5	3	4	-0.2	-0.9	0.2	0.9	0.75	0.037
	CDS1	464.02	373.75	48.33	3.35	1.61	1	2	3	4	5	0.2	-0.9	0.2	0.9	0.75	0.037
	PRR5	89.56	175.32	145.16	81.2	47.68	3	1	2	4	5	0.7	-0.5	0.7	0.5	0.19	0.39
	MPZL2	695.04	333.24	6.14	13.48	5.73	1	2	4	3	5	-0.1	-1	0.1	1	0.87	1.3e-08		Epithelial genes
	INADL	83.41	45.77	65.02	41.01	59.44	1	4	2	5	3	0.1	-0.2	0.1	0.2	0.87	0.75
	EPN3	105.21	100.37	4.06	2.31	13.95	1	2	4	5	3	0.3	-0.6	0.3	0.6	0.62	0.28
	EPHA1	103.41	251.15	2.88	5.34	24.04	2	1	5	4	3	0.3	-0.6	0.3	0.6	0.62	0.28
	CDS1	464.02	373.75	48.33	3.35	1.61	1	2	3	4	5	0.2	-0.9	0.2	0.9	0.75	0.037
	ST14	943.62	649.9	30.93	15.59	8.57	1	2	3	4	5	0.2	-0.9	0.2	0.9	0.75	0.037
	EPB41L5	22.78	14.23	30.02	39.44	57.18	4	5	3	2	1	-0.5	0.8	0.5	0.8	0.39	0.1
	ERBB3	152.12	520.85	72.09	31.31	37.92	2	1	3	5	4	0.7	-0.6	0.7	0.6	0.19	0.28
	RAB25	851.99	475.74	15.23	42.53	1.53	1	2	4	3	5	-0.1	-1	0.1	1	0.87	1.3e-08
	PRSS8	911.37	362.55	24.62	27.54	13.28	1	2	4	3	5	-0.1	-1	0.1	1	0.87	1.3e-08
	TMEM30B	510.27	921.59	14.98	36.17	32.8	2	1	5	3	4	0.1	-0.8	0.1	0.8	0.87	0.1
	CLDN7	1004.96	1422.12	31.4	22.27	226.65	2	1	4	5	3	0.6	-0.5	0.6	0.5	0.28	0.39
	CDS1	464.02	373.75	48.33	3.35	1.61	1	2	3	4	5	0.2	-0.9	0.2	0.9	0.75	0.037
	SCNN1A	220.56	649.51	110.86	22.42	41.66	2	1	3	5	4	0.7	-0.6	0.7	0.6	0.19	0.28
	CDH1	4359.94	2861.25	280.72	122.77	23.02	1	2	3	4	5	0.2	-0.9	0.2	0.9	0.75	0.037
													Mean	0.3	0.7
													Median	0.2	0.7
													Min	0	0
													Max	0.9	1
													Stdev	0.3	0.3
													t-test for difference between correlations EMT GE - WFA IC50 vs EMT GE - SIL IC50:
													t-value:	7.48
													p-value:	1.7e-11
													conclusion:	WFA IC50 exhibits significantly higher correlation with the pattern of EMT gene expression than SIL IC50

## Sheet: CTB_IC50_H1650
SIL 24h				SIL 48h			SIL 72h				WFA 24h				WFA 48h			WFA 72h
uM	Viability, %	CTB, mean	CTB, std	Viability, %	CTB, mean	CTB, std	Viability, %	CTB, mean	CTB, std		uM	Viability, %	CTB, mean	CTB, std	Viability, %	CTB, mean	CTB, std	Viability, %	CTB, mean	CTB, std
Measurement #1											Measurement #1
0	100	16213.3	393.5	100	23593.2	667.667	100	21195.8	657.333		0	100	7984.17	312	100	9969.5	507.833	100	11867.5	456
40	94.0584	15250	268.5	103.475	24413	667.667	101.098	21428.5	515.333		1	81.4967	6506.83	249.667	61.8453	6165.67	292.333	50.6873	6015.33	230.333
60	96.5204	15649.2	270	105.172	24813.5	399.833	96.7297	20502.7	593		2	72.6939	5804	241.167	45.2881	4515	221.333	35.4595	4208.17	254
80	89.5158	14513.5	406.167	103.146	24335.5	389.5	98.5972	20898.5	517.333		4	67.4105	5382.17	194.667	34.6607	3455.5	145.167	27.1525	3222.33	165.667
160	92.6069	15014.7	208.833	91.0631	21484.7	467.5	72.1329	15289.2	512.667		6	57.0567	4555.5	169.333	28.0171	2793.17	105.833	25.3117	3003.88	180.843
320	76.766	12446.3	267.667	62.1727	14668.5	242	24.3192	5154.67	118		8	47.9365	3827.33	138	26.5409	2646	95.5	21.7105	2576.5	123
480	60.8121	9859.67	172.5	48.425	11425	228.5	23.1343	4903.5	111.5		16	42.912	3426.17	120.667	21.8817	2181.5	69.3333	18.413	2185.17	89.333
640	48.2648	7825.33	135	32.6055	7692.67	117.333	17.8235	3777.83	101.833		32	23.39	1867.5	62.8333	17.9665	1791.17	56.8333	14.9062	1769	63.5
1280	29.302	4750.83	86.1667	15.8584	3741.5	64.3333	13.4358	2847.83	65		64	23.2397	1855.5	50.5	17.6304	1757.67	54.3333	14.9062	1769	43.3333
2560	20.7617	3366.17	42.1667	17.0692	4027.17	70	15.1374	3208.5	56.5		128	23.7386	1895.33	43.1667	17.3496	1729.67	42.3333	14.5916	1731.67	60.8333
Measurement #2											Measurement #2
0	100	18985.7	1036	100	23996.3	615.5	100	23912.8	141.167		0	100	19362.7	533.5	100	21208.5	788	100	21600.7	487.333
40	99.0063	18797	872.167	90.6375	21749.7	524	98.8995	23649.7	163.667		1	99.8063	19325.2	408.333	97.0853	20590.3	735.833	99.3835	21467.5	362.5
60	98.5735	18714.8	823.833	98.8255	23714.5	490.167	97.2274	23249.8	148.667		2	94.0263	18206	317.333	83.4052	17689	529.5	77.9004	16827	293.667
80	96.3762	18297.7	815.333	98.7088	23686.5	502	97.6456	23349.8	161.667		4	80.8997	15664.3	290.333	63.8203	13535.3	367.667	45.1977	9763	133
160	94.9804	18032.7	768.667	87.5669	21012.8	397.333	80.2763	19196.3	125.667		6	87.475	16937.5	297	60.2651	12781.3	341.333	40.7711	8806.83	135
320	82.0277	15573.5	720.333	58.4061	14015.3	227.333	36.5452	8739	72.3333		8	68.1259	13191	299.833	37.3993	7931.83	230.167	25.4622	5500	97.6667
480	68.1172	12932.5	544.5	45.9758	11032.5	209	29.1698	6975.33	66.1667		16	40.7649	7893.17	150.167	18.014	3820.5	96.6667	12.1138	2616.67	50.5
640	53.9705	10246.7	417	30.4956	7317.83	128.667	22.2551	5321.83	34.5		32	9.50024	1839.5	30.5	8.75121	1856	39.8333	8.23046	1777.83	29.5
1280	29.7338	5645.17	227.5	15.9566	3829	56	15.5593	3720.67	33.5		64	9.39006	1818.17	31	8.341	1769	33	8.22737	1777.17	26.6667
2560	17.2902	3282.67	104.167	15.8781	3810.17	37.1667	17.9137	4283.67	47		128	9.24804	1790.67	18.1667	8.2577	1751.33	53.1667	8.16641	1764	17.5
Measurement #3											Measurement #3
0	100	27129	948.667	100	23216.8	1031	100	22580.2	801		0	100	21876.3	862	100	23307.7	768.667	100	15848	708.6
40	94.0543	25516	814.667	102.777	23861.5	1012.33	99.5992	22489.7	846		1	94.958	20773.3	710.5	87.2417	20334	481.833	52.5315	8325.2	344.8
60	102.422	27786.2	877.167	104.539	24270.7	1001.83	99.7239	22517.8	778.5		2	83.572	18282.5	663.333	69.7296	16252.3	358.667	30.2903	4800.4	190.2
80	102.776	27882.2	828.167	103.496	24028.5	925.333	94.5446	21348.3	763.167		4	81.9836	17935	611.833	55.7814	13001.3	326	18.8402	2985.8	123.8
160	93.4455	25350.8	655.5	83.3268	19345.8	786.333	61.8352	13962.5	369.5		6	69.5813	15221.8	618.833	42.4231	9887.83	219.333	16.4374	2605	96.6
320	84.3747	22890	601.5	62.9608	14617.5	609.833	18.3886	4152.17	120.333		8	56.539	12368.7	328.833	30.5772	7126.83	142.5	16.7302	2651.4	95
480	74.4849	20207	475.333	48.1727	11184.2	346.333	16.3964	3702.33	89.1667		16	30.8568	6750.33	155.667	8.4071	1959.5	32.8333	12.8723	2040	61.6
640	50.0246	13571.2	363.5	28.2927	6568.67	211.667	17.5781	3969.17	87.6667		32	9.14839	2001.33	53	7.99379	1863.17	42	12.8016	2028.8	65
1280	12.2016	3310.17	94.5	12.1141	2812.5	89.5	10.6199	2398	61.3333		64	8.98917	1966.5	35	7.84291	1828	31.6667	13.0111	2062	49.8
2560	13.0641	3544.17	60.8333	14.0774	3268.33	78.3333	12.1124	2735	56.5		128	8.79794	1924.67	23.5	7.64198	1781.17	19.6333	11.9479	1893.5	35.6
SIL 24h			SIL 48h			SIL 72h					WFA 24h			WFA 48h			WFA 72h
uM	mean	std	uM	mean	std	uM	mean	std			uM	mean	std	uM	mean	std	uM	mean	std
0	100	0	0	100	0	0	100	0			0	100	0	0	100	0	0	100	0
40	95.7063	2.85783	40	98.963	7.21859	40	99.8655	1.12304			1	92.087	9.48644	1	82.0574	18.183	1	67.5341	27.5978
60	99.1721	2.9962	60	102.846	3.49593	60	97.8937	1.60446			2	83.4307	10.6669	2	66.141	19.3103	2	47.8834	26.1237
80	96.2228	6.63154	80	101.784	2.66869	80	96.9291	2.11916			4	76.7646	8.11898	4	51.4208	15.0609	4	30.3968	13.4749
160	93.6776	1.20366	160	87.3189	3.87412	160	71.4148	9.24147			6	71.371	15.288	6	43.5685	16.1545	6	27.5067	12.3145
320	81.0561	3.89624	320	61.1799	2.43422	320	26.4177	9.25844			8	57.5338	10.1314	8	31.5058	5.48842	8	21.3009	4.38038
480	67.8047	6.84174	480	47.5245	1.34715	480	22.9002	6.38994			16	38.1779	6.43051	16	16.1009	6.93803	16	14.4664	3.43884
640	50.7533	2.92184	640	30.4646	2.15657	640	19.2189	2.63231			32	14.0129	8.12276	32	11.5705	5.55201	32	11.9794	3.41297
1280	23.7458	9.99993	1280	14.643	2.1907	1280	13.205	2.47775			64	13.873	8.11432	64	11.2714	5.51268	64	12.0482	3.44195
2560	17.0387	3.85496	2560	15.6749	1.5062	2560	15.0545	2.90153			128	13.9282	8.49907	128	11.0831	5.43567	128	11.5686	3.22935
Hill's sigmoid function fit											Hill's sigmoid function fit
IC50	584.14			361			192.8				IC50	9.49			3.53			1.55
Hill's coef.	2.46			2.2			3.4				Hill's coef.	1.6			1.2			1.2

## Sheet: CTB_IC50_H1975
SIL 24h				SIL 48h			SIL 72h				WFA 24h				WFA 48h			WFA 72h
uM	Viability, %	CTB, mean	CTB, std	Viability, %	CTB, mean	CTB, std	Viability, %	CTB, mean	CTB, std		uM	Viability, %	CTB, mean	CTB, std	Viability, %	CTB, mean	CTB, std	Viability, %	CTB, mean	CTB, std
Measurement #1											Measurement #1
0	100	15615.2	610.167	100	13773	796.333	100	17157.2	515.167		0	100	14420	417.833	100	14190	597	100	16227.5	593.333
40	98.8003	15427.8	656	98.75	13600.8	702.333	98.8702	16963.3	559.833		1	93.346	13460.5	279.333	96.1135	13638.5	524	96.9979	15740.3	471.167
80	97.2762	15189.8	486	100.81	13884.5	760.833	95.3664	16362.2	538		2	85.6172	12346	262.333	81.5398	11570.5	428.333	83.4407	13540.3	368.333
160	87.5346	13668.7	485.167	88.2524	12155	564	83.5783	14339.7	425.667		4	85.6704	12353.7	253.833	73.9922	10499.5	353.667	74.9335	12159.8	341.167
320	89.9051	14038.8	424.167	74.7126	10290.2	467.5	50.1569	8605.5	236		6	83.8095	12085.3	235.167	65.4369	9285.5	298	58.9257	9562.17	280.5
480	79.0183	12338.8	359.333	56.5055	7782.5	338.667	40.5797	6962.33	206.5		8	48.3021	6965.17	106.667	28.6904	4071.17	144.667	21.0014	3408	116.5
640	54.7737	8553	250.5	38.5428	5308.5	216.833	27.1908	4665.17	132.667		16	20.6172	2973	46.5	13.3016	1887.5	58.5	11.196	1816.83	64.5
1280	16.7113	2609.5	77.8333	15.845	2182.33	85	15.1977	2607.5	63.5		32	13.9552	2012.33	35	27.1447	3851.83	171.333	11.1621	1811.33	60.6667
2560	16.595	2591.33	67.8333	16.893	2326.67	88.5	16.1769	2775.5	71.6667		64	14.0002	2018.83	34.1667	12.9046	1831.17	63.6667	10.9228	1772.5	61.6667
5120	24.7868	3870.5	64.5	20.7108	2852.5	100	19.7002	3380	70.5		128	13.939	2010	31.3333	12.9293	1834.67	53.1667	11.1714	1812.83	47.1667
Measurement #2											Measurement #2
0	100	18024.3	603.333	100	17275.5	783.167	100	21000.2	907		0	100	16306.7	709.667	100	14867.5	781.333	100	18460.6	1126.4
40	102.251	18430	646	98.2248	16968.8	791	98.2153	20625.4	899.8		1	101.547	16559	666.667	103.957	15455.8	759.333	106.66	19690	1053.6
80	101.463	18288	634.833	98.9108	17087.3	792.5	96.7667	20321.2	866.4		2	101.009	16471.2	649.667	102.335	15214.7	755.5	103.415	19091	1030.8
160	102.583	18489.8	649.333	98.8249	17072.5	723.667	93.362	19606.2	740.8		4	98.6253	16082.5	602.667	97.462	14490.2	706.833	95.6751	17662.2	840
320	98.6518	17781.3	555	85.0578	14694.2	600.167	64.048	13450.2	560.2		6	99.5309	16230.2	630.333	96.23	14307	614.167	91.7847	16944	795.8
480	94.0553	16952.8	527.167	68.8364	11891.8	423.333	48.0119	10082.6	359.4		8	78.889	12864.2	462.333	53.8344	8003.83	341.5	45.9909	8490.2	367
640	54.6206	9845	296	31.0922	5371.33	179.667	23.7645	4990.6	170.6		16	23.1705	3778.33	130.667	13.7414	2043	79.6667	12.0711	2228.4	91.6
1280	18.3428	3306.17	94.8333	14.4839	2502.17	75.5	14.3865	3021.2	83.8		32	15.1247	2466.33	86	11.6361	1730	67.8333	10.8306	1999.4	77.2
2560	18.4963	3333.83	90.3333	15.9253	2751.17	85.3333	15.9398	3347.4	101.2		64	11.5934	1890.5	59.5	11.5621	1719	60.6667	10.9076	2013.6	79.4
5120	18.8652	3400.33	63	15.5577	2687.67	57.6667	15.9189	3343	62		128	11.3481	1850.5	55	11.3346	1685.17	48.3333	11.0116	2032.8	62.2
Measurement #3											Measurement #3
0	100	17170.8	739.333	100	26371.3	844	100	19369.8	929.667		0	100	18953.7	661.5	100	26020.2	1014.5	100	18141.8	967.667
40	97.057	16665.5	695.333	102.526	27037.5	790.333	99.9888	19367.7	906		1	103.407	19599.3	622.167	102.645	26708.3	947.833	107.68	19535.2	1018.67
80	97.189	16688.2	673	102.546	27042.8	803.667	101.342	19629.8	973		2	105.418	19980.7	590.333	102.522	26676.5	936.333	109.461	19858.2	1099
160	98.3528	16888	681	102.213	26954.8	770.667	103.169	19983.7	791.833		4	107.175	20313.7	608.833	100.988	26277.3	870.5	107.86	19567.8	959.333
320	94.0335	16146.3	591.667	88.6664	23382.5	548.5	48.5953	9412.83	395.833		6	110.585	20960	504.333	99.3428	25849.2	858.333	104.295	18921	901.833
480	81.1832	13939.8	469.5	79.7185	21022.8	496.167	39.1296	7579.33	289.5		8	112.072	21241.7	540	94.241	24521.7	740.167	76.3833	13857.3	705.167
640	59.0711	10143	316.5	55.5692	14654.3	414.667	26.7504	5181.5	171.833		16	51.013	9668.83	239.5	43.1761	11234.5	342.667	12.2571	2223.67	101
1280	14.6401	2513.83	66.8333	13.3636	3524.17	73	20.2987	3931.83	109.167		32	20.7787	3938.33	92.3333	9.01416	2345.5	55.8333	11.0095	1997.33	78.6667
2560	14.975	2571.33	76.8333	16.2809	4293.5	105.833	24.8927	4821.67	134.167		64	11.055	2095.33	44.1667	7.5781	1971.83	50.5	11.1722	2026.83	89.1667
5120	17.0619	2929.67	53.8333	18.9296	4992	84.1667	26.771	5185.5	100.5		128	10.1405	1922	25.3333	7.74079	2014.17	34.8333	11.2769	2045.83	69.3333
SIL 24h			SIL 48h			SIL 72h					WFA 24h			WFA 48h			WFA 72h
uM	mean	std	uM	mean	std	uM	mean	std			uM	mean	std	uM	mean	std	uM	mean	std
0	100	0	0	100	1.00486e-14	0	100	0			0	100	0	0	100	1.00486e-14	0	100	0
40	99.3693	2.64316	40	99.8336	2.34648	40	99.0248	0.89682			1	99.4333	5.35308	1	100.905	4.20127	1	103.779	5.89494
80	98.6427	2.44272	80	100.756	1.81837	80	97.8251	3.1254			2	97.3482	10.3958	2	95.4658	12.0606	2	98.772	13.6171
160	96.1567	7.7607	160	96.43	7.28176	160	93.3698	9.79537			4	97.157	10.8274	4	90.8142	14.6745	4	92.823	16.6477
320	94.1968	4.37564	320	82.8123	7.24284	320	54.2667	8.50671			6	97.9753	13.4556	6	87.0033	18.7417	6	85.0017	23.4328
480	84.7522	8.12904	480	68.3535	11.614	480	42.5737	4.76509			8	79.7542	31.8935	8	58.9219	33.0701	8	47.7919	27.7349
640	56.1551	2.52647	640	41.7347	12.5468	640	25.9019	1.86406			16	31.6002	16.8604	16	23.4064	17.1225	16	11.8414	0.566619
1280	16.5647	1.85568	1280	14.5642	1.24264	1280	16.6277	3.20501			32	16.6195	3.64914	32	15.9317	9.79887	32	11.0008	0.165918
2560	16.6888	1.76252	2560	16.3664	0.489478	2560	19.0031	5.10185			64	12.2162	1.56827	64	10.6816	2.77028	64	11.0008	0.148556
5120	20.238	4.04127	5120	18.3994	2.61717	5120	20.7967	5.50852			128	11.8092	1.94075	128	10.6682	2.65766	128	11.1533	0.133584
Hill's sigmoid function fit											Hill's sigmoid function fit
IC50	630.5			526.92			315.48				IC50	11.42			8.81			7.6
Hill's coef.	5.9			3.6			2.93				Hill's coef.	3.91			3.5			6.4

## Sheet: CTB_IC50_A549
SIL 24h				SIL 48h			SIL 72h				WFA 24h				WFA 48h			WFA 72h
uM	Viability, %	CTB, mean	CTB, std	Viability, %	CTB, mean	CTB, std	Viability, %	CTB, mean	CTB, std		uM	Viability, %	CTB, mean	CTB, std	Viability, %	CTB, mean	CTB, std	Viability, %	CTB, mean	CTB, std
Measurement #1											Measurement #1
0	100	21327.3	924.167	100	24061.1	1036.17	100	21916.3	1159.83		0	100	25562	952.833	100	28364	883.5	100	24625	1558.67
40	97.7337	20843.9	951	98.164	23619.3	1041.5	102.772	22523.7	1139		1	99.436	25417.8	837.333	95.6618	27133.5	841.5	104.518	25737.5	1539.17
60	99.8997	21305.9	980.667	106.08	25524.1	1014.33	104.035	22800.7	1258.83		2	98.9144	25284.5	905.167	104.096	29525.8	889.833	106.83	26306.8	1537.67
80	94.2499	20100.9	850.667	103.585	24923.6	922	106.558	23353.6	1088		4	89.4244	22858.7	970.667	98.2125	27857	922.667	95.0118	23396.7	1321.17
160	98.9596	21105.4	777.5	107.977	25980.5	840.167	104.088	22812.2	902.333		6	83.733	21403.8	596.167	95.6177	27121	687.333	92.4284	22760.5	1139
320	88.4707	18868.4	672.167	75.6176	18194.4	833.5	56.1379	12303.3	294.167		8	82.3449	21049	575.833	95.2545	27018	867	91.5073	22533.7	1200.17
480	83.4166	17790.5	302	68.0023	16362.1	405	38.0438	8337.78	154.5		16	81.2899	20779.3	539	93.6151	26553	878.833	86.8697	21391.7	962.333
640	57.6033	12285.2	97.1667	45.3093	10901.9	86.5	30.452	6673.94	124.167		32	58.8765	15050	365.833	86.6856	24587.5	707.667	67.4294	16604.5	771.333
1280	24.905	5311.56	73.3333	16.3694	3938.67	89.3333	14.272	3127.89	138.167		64	20.2892	5186.33	139	44.7357	12688.8	438	8.18206	2014.83	86.8333
2560	15.4942	3304.5	462.167	14.8563	3574.58	99.3333	16.3174	3576.17	138.167		128	8.00472	2046.17	44.1667	6.42716	1823	53.3333	7.52217	1852.33	58.3333
Measurement #2											Measurement #2
0	100	21268.7	878	100	30028.5	1155.83	100	26570.7	941.333		0	100	25426.2	826	100	23779.5	1163.33	100	27462.2	1368.8
40	91.3974	19439	485.333	96.6671	29027.7	1016.33	101.159	26878.7	805.167		1	98.731	25103.5	745.167	100.774	23963.5	1094.5	100.176	27510.6	1347.4
60	96.1908	20458.5	420	106.252	31905.8	811.833	99.0209	26310.5	905.833		2	98.984	25167.8	768	100.036	23788	950	99.2288	27250.4	1316.2
80	85.1918	18119.2	516	103.785	31165	775.833	103.544	27512.3	817.333		4	96.1018	24435	646.5	97.0717	23083.2	925.5	94.018	25819.4	1194.4
160	91.5235	19465.8	277.667	107.443	32263.5	609.333	92.7088	24633.3	840.333		6	87.172	22164.5	489.333	80.2084	19073.2	683.167	73.3168	20134.4	859.4
320	77.749	16536.2	262.333	67.3027	20210	403	45.5866	12112.7	366.5		8	82.6301	21009.7	456.333	68.4392	16274.5	573.833	66.3086	18209.8	770.6
480	62.8585	13369.2	186.667	61.5482	18482	352.5	33.0082	8770.5	229		16	58.8882	14973	334.667	46.5814	11076.8	340.333	38.3567	10533.6	410.6
640	41.2634	8776.17	121.667	43.018	12917.7	202.5	24.5314	6518.17	168.333		32	19.4236	4938.67	106.333	8.6433	2055.33	62.5	7.18588	1973.4	67
1280	23.356	4967.5	80.1667	11.3664	3413.17	57.8333	12.2265	3248.67	86.8333		64	7.5244	1913.17	38	7.35017	1747.83	47.5	7.18806	1974	68.2
2560	16.9193	3598.5	71.1667	13.1281	3942.17	53.6667	13.8869	3689.83	73.6667		128	7.63321	1940.83	35.1667	7.28429	1732.17	41.6667	7.07882	1944	45.6
Measurement #3											Measurement #3
0	100	24937.8	1295.17	100	24542.5	1177	100	28984.4	1347.2		0	100	21740.7	948.333	100	29301.3	1116	100	23401.8	1228
40	103.04	25696	1213	104.561	25661.8	1129.33	103.529	30007.2	1341.8		1	100.37	21821.2	917	102.405	30006	1069.5	107.434	25141.5	1176.67
60	103.915	25914.2	1199.17	104.7	25696	1153.83	102.548	29723	1506.8		2	99.2288	21573	891.167	103.174	30231.3	1147.5	107.982	25269.7	1051.33
80	105.184	26230.7	1033	106.654	26175.5	1080.17	105.168	30482.2	1383.8		4	100.486	21846.3	797.167	103.918	30449.5	1160.83	105.01	24574.3	1075
160	103.36	25775.7	996.833	99.38	24390.3	958.5	94.6937	27446.4	1170.2		6	80.7366	17552.7	569	92.8012	27192	881.5	68.615	16057.2	609
320	96.5327	24073.2	912.333	76.885	18869.5	657	55.3311	16037.4	638.6		8	80.9282	17594.3	573.833	93.6197	27431.8	883.333	62.4403	14612.2	711.5
480	79.1421	19736.3	717	43.3703	10644.2	382	33.901	9826	382.2		16	44.153	9599.17	270.833	57.2642	16779.2	467	17.8626	4180.17	176.333
640	43.1032	10749	351.833	25.7485	6319.33	188.333	19.6423	5693.2	161.2		32	12.1102	2632.83	85.3333	6.76647	1982.67	47.8333	8.62254	2017.83	88.1667
1280	12.0038	2993.5	103.5	10.8363	2659.5	80.1667	10.7244	3108.4	89.8		64	7.86314	1709.5	44.6667	6.57649	1927	52.3333	8.58622	2009.33	77
2560	13.3191	3321.5	89.6667	12.6162	3096.33	64.1667	12.644	3664.8	73.8		128	7.54193	1639.67	28.5	6.57934	1927.83	39	8.4972	1988.5	53.3333
SIL 24h			SIL 48h			SIL 72h					WFA 24h			WFA 48h			WFA 72h
uM	mean	std	uM	mean	std	uM	mean	std			uM	mean	std	uM	mean	std	uM	mean	std
0	100	1.00486e-14	0	100	0	0	100	1.00486e-14			0	100	1.42109e-14	0	100	0	0	100	1.00486e-14
40	97.3904	5.82902	40	99.7973	4.19266	40	102.487	1.21027			1	99.5124	0.82232	1	99.6135	3.51813	1	104.043	3.65208
60	100.002	3.86315	60	105.677	0.850778	60	101.868	2.57548			2	99.0424	0.16513	2	102.435	2.1286	2	104.68	4.75594
80	94.8753	10.0109	80	104.674	1.71712	80	105.09	1.50864			4	95.3374	5.57029	4	99.7342	3.66828	4	98.0134	6.07986
160	97.9476	5.98262	160	104.933	4.81681	160	97.1635	6.0784			6	83.8805	3.22026	6	89.5425	8.20524	6	78.1201	12.6124
320	87.5841	9.42321	320	73.2684	5.20518	320	52.3519	5.87276			8	81.9677	0.911475	8	85.7712	15.0322	8	73.4187	15.7841
480	75.1391	10.8479	480	57.6403	12.7725	480	34.9843	2.6869			16	61.4437	18.6999	16	65.8203	24.6566	16	47.6963	35.4389
640	47.3233	8.95018	640	38.0253	10.6935	640	24.8752	5.41305			32	30.1367	25.1565	32	34.0318	45.6092	32	27.746	34.3744
1280	20.0883	7.04402	1280	12.8574	3.05306	1280	12.4076	1.78072			64	11.8923	7.27396	64	19.5541	21.8113	64	7.98545	0.719518
2560	15.2442	1.81304	2560	13.5335	1.17379	2560	14.2828	1.86841			128	7.72662	0.245126	128	6.76359	0.457306	128	7.69939	0.725607
Hill's sigmoid function fit											Hill's sigmoid function fit
IC50	584			460.2			309.8				IC50	19.1			17.96			11.7
Hill's coef.	4			2.8			3				Hill's coef.	1.7			2.87			2.1

## Sheet: CTB_IC50_H838
SIL 24h				SIL 48h			SIL 72h				WFA 24h				WFA 48h			WFA 72h
uM	Viability, %	CTB, mean	CTB, std	Viability, %	CTB, mean	CTB, std	Viability, %	CTB, mean	CTB, std		uM	Viability, %	CTB, mean	CTB, std	Viability, %	CTB, mean	CTB, std	Viability, %	CTB, mean	CTB, std
Measurement #1											Measurement #1
0	100	16492.8	473.167	100	17697.5	672	100	25448.7	739.333		0	100	26342.5	987.333	100	20238.3	695.5	100	24096.7	1284.83
40	91.6378	15113.7	492.333	144.853	25635.3	570.167	108.896	27712.5	565.5		1	98.1443	25853.7	761.167	96.0364	19436.2	495.833	101.284	24406	996
60	95.8578	15809.7	391	149.822	26514.8	511.667	108.021	27490	469.333		2	92.44	24351	746.5	97.7996	19793	382.667	41.8945	10095.2	390.667
80	88.8386	14652	552.333	152.745	27032	511.167	102.62	26115.5	457.833		4	91.3821	24072.3	696.333	115.416	23358.3	545.167	48.0329	11574.3	347
160	89.9552	14836.2	344.667	91.9038	16264.7	291.5	43.4712	11062.8	197		6	90.6267	23873.3	751.167	112.873	22843.7	511.333	37.8932	9131	234.333
320	41.991	6925.5	158.333	27.5293	4872	78.5	13.6883	3483.5	64.1667		8	81.5501	21482.3	433	86.5379	17513.8	308.667	15.8016	3807.67	111.167
480	32.3888	5341.83	114	21.6584	3833	77.8333	12.3569	3144.67	72.1667		16	77.5591	20431	785.667	86.0611	17417.3	444.5	10.6806	2573.67	64
640	20.426	3368.83	73.6667	20.4389	3617.17	59	12.5246	3187.33	62.6667		32	11.0968	2923.17	77	10.3236	2089.33	48.3333	8.95421	2157.67	57.5
1280	16.3202	2691.67	53.6667	19.8823	3518.67	69.3333	13.2103	3361.83	62.8333		64	9.05065	2384.17	62	9.47706	1918	42.6667	7.63384	1839.5	48.6667
2560	20.0511	3307	52.8333	25.5987	4530.33	67.3333	16.4403	4183.83	64.8333		128	7.7878	2051.5	37.3333	9.00519	1822.5	30	7.61032	1833.83	52.8333
Measurement #2											Measurement #2
0	100	27645.2	988	100	20672.3	760.833	100	19317.4	774.924		0	100	20921.4	708.63	100	17667	1156.83	100	14229.7	624.833
40	99.9572	27633.3	780.667	135.172	27943.2	523.833	112.599	21751.2	776.68		1	93.8496	19634.7	553.7	114.721	20267.8	1121	114.472	16289	618.833
60	99.0824	27391.5	738	137.604	28446	482.833	110.304	21307.8	780.427		2	80.091	16756.2	364	111.99	19785.3	1066	112.932	16069.8	533.333
80	100.449	27769.3	688.5	138.21	28571.2	467.5	98.6946	19065.2	778.372		4	76.9172	16092.2	425.37	103.65	18311.8	984.667	100.945	14364.2	382.167
160	85.6907	23689.3	688.333	91.5547	18926.5	325	38.7168	7479.08	262.253		6	77.9468	16307.6	207.43	105.995	18726.2	851.167	99.3628	14139	356.833
320	45.2991	12523	280	26.479	5473.83	81.6667	14.9071	2879.67	110.675		8	65.1394	13628.1	123.67	107.889	19060.8	982.333	93.6752	13329.7	323
480	53.743	14857.3	316	18.2031	3763	333	13.9787	2700.33	93.1376		16	14.3565	3003.58	94.97	74.2514	13118	549.333	85.05	12102.3	274.667
640	18.6802	5164.17	110	17.0179	3518	50.1667	14.0935	2722.5	89.052		32	10.3554	2166.5	73.27	15.9082	2810.5	120	16.2817	2316.83	58.1667
1280	11.1864	3092.5	80.3333	17.1913	3553.83	67.3333	14.5167	2804.25	88.3546		64	9.73444	2036.58	41.07	10.2243	1806.33	66.8333	13.22	1881.17	58
2560	12.4928	3453.67	81.8333	22.5865	4669.17	71	17.3427	3350.17	90.7724		128	9.57392	2003	28.47	10.1243	1788.67	53.6667	13.8103	1965.17	38.3333
Measurement #3											Measurement #3
0	100	26974.3	911.167	100	18478.5	897	100	13186.2	812.667		0	100	22256.8	829.667	100	20567.8	977.333	100	15903	1093.17
40	104.146	28092.7	684.833	127.204	23505.3	768.5	119.745	15789.8	813.167		1	97.6307	21729.5	825.667	110.259	22677.8	998.667	116.735	18564.3	1140.83
60	102.103	27541.7	646	125.055	23108.3	727.833	114.709	15125.7	745.833		2	94.3583	21001.2	783.333	107.069	22021.8	991.167	110.862	17630.3	1147.33
80	94.9977	25625	606.167	126.342	23346.2	759.667	91.1182	12015	576.333		4	86.6468	19284.8	716.5	104.856	21566.7	818	110.067	17504	929.333
160	93.8862	25325.2	449.5	83.01	15339	470.833	29.5411	3895.33	161.167		6	84.8099	18876	664.667	108.154	22245	767.5	108.74	17293	907.167
320	94.8797	25593.2	463.833	21.7758	4023.83	119.5	17.2592	2275.83	100		8	85.0241	18923.7	629.167	110.531	22733.8	704.667	84.4621	13432	616
480	74.1674	20006.2	491.5	17.3246	3201.33	79.1667	17.1088	2256	91.1667		16	40.4408	9000.83	321	41.7294	8582.83	268.333	20.123	3200.17	129.5
640	21.5334	5808.5	162.833	15.3178	2830.5	73.5	17.1215	2257.67	92.5		32	9.17321	2041.67	58.5	9.35441	1924	46.6667	12.484	1985.33	65
1280	7.23713	1952.17	67	14.9246	2757.83	78.3333	17.0381	2246.67	84.1667		64	7.97433	1774.83	47.8333	9.04973	1861.33	52	12.1675	1935	68.3333
2560	7.38356	1991.67	50.3333	17.0017	3141.67	62.8333	19.0844	2516.5	83		128	7.93539	1766.17	36.1667	9.25555	1903.67	36.3333	12.3834	1969.33	54.3333
SIL 24h			SIL 48h			SIL 72h					WFA 24h			WFA 48h			WFA 72h
uM	mean	std	uM	mean	std	uM	mean	std			uM	mean	std	uM	mean	std	uM	mean	std
0	100	0	0	100	0	0	100	0			0	100	0	0	100	0	0	100	1.00486e-14
40	98.5803	6.36673	40	135.743	8.83842	40	113.747	5.51521			1	96.5415	2.34539	1	107.006	9.75808	1	110.83	8.34455
60	99.0145	3.12327	60	137.494	12.384	60	111.011	3.39929			2	88.9631	7.7431	2	105.62	7.20559	2	88.5627	40.4291
80	94.7618	5.80887	80	139.099	13.2236	80	97.4777	5.84681			4	84.982	7.37476	4	107.974	6.47323	4	86.3485	33.4942
160	89.844	4.09887	160	88.8228	5.03709	160	37.243	7.08103			6	84.4611	6.34711	6	109.008	3.51754	6	81.9988	38.4833
320	60.7232	29.6266	320	25.2614	3.06396	320	15.2849	1.81518			8	77.2379	10.6206	8	101.653	13.1563	8	64.6463	42.5508
480	53.4331	20.891	480	19.062	2.29103	480	14.4815	2.41553			16	44.1188	31.7614	16	67.3473	22.9581	16	38.6179	40.4876
640	20.2132	1.43848	640	17.5915	2.60827	640	14.5798	2.33673			32	10.2085	0.970162	32	11.8621	3.53739	32	12.5733	3.66457
1280	11.5813	4.5544	1280	17.3327	2.48189	1280	14.9217	1.94577			64	8.91981	0.887321	64	9.58371	0.59452	64	11.0071	2.96838
2560	13.3092	6.37312	2560	21.729	4.36217	2560	17.6225	1.34407			128	8.43237	0.991364	128	9.46169	0.587362	128	11.268	3.24702
Hill's sigmoid function fit											Hill's sigmoid function fit
IC50	389.38			172.78			126.17				IC50	13.78			17.26			10.38
Hill's coef.	2.5			7.5			5				Hill's coef.	2.6			5.5			1.9
															21.1
															1.7

## Sheet: CTB_IC50_H2020
SIL 24h				SIL 48h			SIL 72h				WFA 24h				WFA 48h			WFA 72h
uM	Viability, %	CTB, mean	CTB, std	Viability, %	CTB, mean	CTB, std	Viability, %	CTB, mean	CTB, std		uM	Viability, %	CTB, mean	CTB, std	Viability, %	CTB, mean	CTB, std	Viability, %	CTB, mean	CTB, std
Measurement #1											Measurement #1
0	100	22128.5	1323.83	100	24141.7	1499.33	100	16365.5	1099.67		0	100	27015.8	668.5	100	18263.5	1255.17	100	16770.3	501.833
40	98.4507	21785.7	1155.17	100.81	24337.3	1524.17	90.4382	14800.7	972.667		1	106.016	28641.2	478.667	112.963	20631	1218.5	108.489	18194	448.5
60	100.175	22167.2	1117.5	100.349	24226	1502.5	99.6751	16312.3	614.833		2	105.155	28408.5	516.167	108.337	19786.2	1142	108.161	18139	351.833
80	99.0939	21928	1129.83	100.883	24354.8	1436.5	99.7118	16318.3	616		4	106.073	28656.5	365.167	105.659	19297	1055	104.771	17570.5	357.5
160	99.1632	21943.3	1039.67	97.2475	23477.2	1295.5	74.6958	12224.3	409.667		6	103.417	27939	416.667	109.234	19950	937.667	103.924	17428.3	335
320	85.1594	18844.5	911.833	73.6307	17775.7	909.167	35.641	5832.83	205		8	100.845	27244.2	396.667	112.151	20482.7	831.5	98.2539	16477.5	242
480	70.587	15619.8	670.167	62.127	14998.5	674.333	29.5795	4840.83	149		16	97.3781	26307.5	333.167	89.6871	16380	581.667	50.9869	8550.67	103
640	48.2636	10680	448.5	39.0273	9421.83	413.167	20.919	3423.5	106.333		32	78.425	21187.2	232	60.5123	11051.7	356.167	59.7235	10015.8	159.167
1280	16.1345	3570.33	133.833	11.8757	2867	115.833	14.5499	2381.17	73.1667		64	7.94596	2146.67	22.8333	9.55093	1744.33	49.6667	11.7688	1973.67	29
2560	11.5417	2554	94.8333	12.2347	2953.67	91.6667	15.5143	2539	73.6667		128	7.83183	2115.83	20.8333	9.5856	1750.67	40.6667	11.3613	1905.33	25.3333
Measurement #2											Measurement #2
0	100	21423.3	1121.67	100	23808.5	1340.33	100	24262.7	1397.17		0	100	26570.8	1144.5	100	19740.8	1101.33	100	16692.6	1121.4
40	97.4708	20881.5	810.5	100.927	24029.2	1319.5	99.2169	24072.7	1207.83		1	103.303	27448.5	1253.33	113.656	22436.7	1081.17	116.975	19526.2	1225.8
60	97.5735	20903.5	924.667	101.134	24078.5	1338.83	93.514	22689	1167.67		2	102.897	27340.7	1197.17	112.261	22161.2	946.667	118.427	19768.6	1194.2
80	97.2569	20835.7	845.667	101.762	24228	1361.33	94.3569	22893.5	1056.33		4	103.412	27477.3	1120.5	110.362	21786.3	954.667	117.384	19594.4	1139.6
160	95.4668	20452.2	851.167	100.258	23869.8	1167.33	81.0848	19673.3	868.167		6	102.54	27245.7	999.333	107.083	21139	827.667	115.968	19358	1082
320	76.0433	16291	590	71.9351	17126.7	814	34.0084	8251.33	333		8	100.424	26683.5	963.5	109.103	21537.8	751.667	106.226	17731.8	929.4
480	71.4587	15308.8	483	64.8872	15448.7	711.333	18.2455	4426.83	171.333		16	96.8731	25740	734.5	80.4551	15882.5	529	49.1391	8202.6	384
640	48.2799	10343.2	352.5	42.0697	10016.2	460	19.3246	4688.67	190		32	81.3505	21615.5	497.667	60.5758	11958.2	377.5	68.1236	11371.6	424.8
1280	23.7086	5079.17	160.833	14.2183	3385.17	152.667	11.0018	2669.33	99.8333		64	39.4863	10491.8	240.833	18.7539	3702.17	120.167	17.5623	2931.6	114
2560	13.9762	2994.17	83.8333	13.2999	3166.5	126	12.3592	2998.67	95.3333		128	7.75474	2060.5	38	10.0215	1978.33	47.3333	14.0673	2348.2	50.2
Measurement #3											Measurement #3
0	100	26598.2	951.5	100	21039.8	979.167	100	21438.2	944.833		0	100	25133.2	962	100	21666.5	1504.67	100	20902.7	1049.67
40	104.72	27853.7	879	126.419	26598.3	933.5	104.082	22313.3	983.333		1	102.498	25761.1	784.833	104.671	22678.6	1363.17	106.71	22305.3	981.333
60	106.505	28328.3	878	126.019	26514.2	977.5	104.375	22376.2	791		2	100.806	25335.8	668.333	100.485	21771.6	1187.5	104.368	21815.7	920
80	106.953	28447.7	841	124.358	26164.7	938	104.258	22351.2	807.667		4	95.5658	24018.7	854.833	92.1619	19968.2	996	95.584	19979.6	766.167
160	106.712	28383.5	752.167	114.641	24120.3	782.667	85.5953	18350.1	696		6	96.9014	24354.4	486.333	91.2757	19776.2	854.667	99.2694	20749.9	698.833
320	91.2694	24276	627.333	79.279	16680.2	530	44.628	9567.44	483.833		8	91.9553	23111.3	436.167	91.2203	19764.2	912	85.4149	17854	660.5
480	75.0077	19950.7	502.667	61.7614	12994.5	385.333	32.7199	7014.56	420.667		16	88.4575	22232.2	398.167	79.0641	17130.4	795.333	60.7698	12702.5	344.833
640	36.6235	9741.17	238.5	24.1518	5081.5	131.667	23.3772	5011.67	178.667		32	71.3641	17936.1	407.5	47.4681	10284.7	474.667	49.9243	10435.5	321.833
1280	10.7733	2865.5	78.3333	13.1156	2759.5	69.8333	13.9447	2989.5	77.3333		64	19.8931	4999.78	148.667	8.39506	1818.92	89.8333	17.0316	3560.06	84.8333
2560	13.0617	3474.17	81.3333	15.149	3187.33	72	15.7766	3382.22	77.5		128	8.61787	2165.94	48.3333	8.17352	1770.92	68.8333	11.7452	2455.06	39.5
SIL 24h			SIL 48h			SIL 72h					WFA 24h			WFA 48h			WFA 72h
uM	mean	std	uM	mean	std	uM	mean	std			uM	mean	std	uM	mean	std	uM	mean	std
0	100	1.42109e-14	0	100	1.42109e-14	0	100	1.00486e-14			0	100	1.00486e-14	0	100	0	0	100	0
40	100.214	3.93322	40	109.385	14.7516	40	97.9123	6.9147			1	103.939	1.84314	1	110.43	4.9994	1	110.725	5.48554
60	101.418	4.59356	60	109.167	14.5991	60	99.1881	5.44689			2	102.953	2.17485	2	107.028	5.99601	2	110.319	7.27382
80	101.101	5.15059	80	109.001	13.3067	80	99.4424	4.95629			4	101.683	5.46259	4	102.727	9.44742	4	105.913	10.9446
160	100.447	5.73166	160	104.049	9.296	160	80.4586	5.47669			6	100.953	3.5359	6	102.531	9.80644	6	106.387	8.61731
320	84.1574	7.6624	320	74.9482	3.84516	320	38.0925	5.7185			8	97.7415	5.01542	8	104.158	11.3076	8	96.6314	10.4997
480	72.3511	2.34158	480	62.9252	1.70893	480	26.8483	7.61392			16	94.2362	5.01091	16	83.0687	5.7737	16	53.6319	6.25021
640	44.389	6.72514	640	35.0829	9.58807	640	21.207	2.0416			32	77.0465	5.13392	32	56.1854	7.5495	32	59.2571	9.10863
1280	16.8721	6.4991	1280	13.0699	1.17196	1280	13.1655	1.89807			64	22.4418	15.9239	64	12.2333	5.67648	64	15.4542	3.20268
2560	12.8598	1.22974	2560	13.5612	1.47463	2560	14.55	1.90187			128	8.06815	0.477634	128	9.26022	0.966016	128	12.3913	1.46412
Hill's sigmoid function fit											Hill's sigmoid function fit
IC50	563.5			459.12			238.62				IC50	42.51			30.6			22.58
Hill's coef.	3.3			2.7			2.9				Hill's coef.	3.6			2.4			1.6

## Sheet: CTB_IC50_SUMMARY
IC50 SIL, uM									IC50, relative
Hours	H1650	H1975	A549	H838	H2020		Hours	H1650	H1975	A549	H838	H2020
24	584.14	630.5	584	389.38	563.5		24	0.807731	1	0.80715	0	0.72213
48	361	526.92	460.2	172.78	459.12		48	0.531485	1	0.8116	0	0.80855
72	192.8	315.48	309.8	126.17	238.62		72	0.351962	1	0.969996	0	0.593999
							average	0.563726	1	0.862915	0	0.708227
							rank	4	1	2	5	3
IC50 WFA, uM									IC50, relative
Hours	H1650	H1975	A549	H838	H2020		Hours	H1650	H1975	A549	H838	H2020
24	9.49	11.42	19.1	13.78	42.51		24	0	0.0584494	0.291036	0.129921	1
48	3.53	8.81	17.96	17.26	30.6		48	0	0.19505	0.533062	0.507204	1
72	1.55	7.6	11.7	10.38	22.58		72	0	0.287684	0.482644	0.419876	1
							average	0	0.180395	0.435581	0.352334	1
							rank	5	4	2	3	1
