# Supplementary material for: Transcriptome profiling reveals Silibinin dose-dependent response network in non-small lung cancer cells
Source: PeerJ. 2020 Dec 16;8:e10373. doi: 10.7717/peerj.10373 (PMC7749657; doi:10.7717/peerj.10373)
Supplement: Supplemental Information 2 — GO enrichment terms of 144 positively and 281 negative correlating genes. [file peerj-08-10373-s002.xlsx]

## Sheet: whole_genome_IC50_corr
				Gene expression, orig.			Gene expression in untreated cells, normalized						Gene expression, ranks					Correlation
	Gene symbol	H1650	H1975	A549	H838	H2030	H1650	H1975	A549	H838	H2030	H1650	H1975	A549	H838	H2030	N sign. meas. (M/P only)	Pearson corr	Spearman corr	Acceptance criterion		Acceptamce criterion: yes=1, no=0
211720_x_at	RPLP0	15348.6	16942	16609.8	13626.8	16302	0.519365	1	0.899795	0	0.80695	4	1	2	5	3	5	0.997238	1	1
209249_s_at	GHITM	4719.12	5054.51	5052.51	4344.72	4962.64	0.52748	1	0.997182	0	0.870567	4	1	2	5	3	5	0.99718	1	1		1. significant measurement of gene expression ("M", "P" but not "A") in all cell five cell lines, i.e. N=5
211058_x_at	TUBA1B	15206.1	17707.6	17382.7	12657.1	16370.1	0.504703	1	0.93567	0	0.735175	4	1	2	5	3	5	0.996994	1	1		2. p-val of Pearson correlation <0.05
200011_s_at	ARF3	2297.97	2686.5	2752.84	1830.39	2550.9	0.506889	0.928083	1	0	0.781083	4	2	1	5	3	5	0.995353	0.9	1		3. Both Pearson and Spearman correlation coefficients >=0.9
204360_s_at	NAGLU	327.378	394.383	409.841	208.052	372.102	0.59134	0.923395	1	0	0.812978	4	2	1	5	3	5	0.994394	0.9	1
211747_s_at	LSM5	2759.77	4039.19	4067.1	1303.47	3288.16	0.526952	0.989901	1	0	0.718146	4	2	1	5	3	5	0.994068	0.9	1			genes significantly and positively ocrrelating with the SIL IC50 signature of five NSCLC cell lines
213867_x_at	ACTB	20702.2	22230.3	22148.9	17876.3	21942.8	0.649035	1	0.981305	0	0.933969	4	1	2	5	3	5	0.99046	1	1
203781_at	MRPL33	2657.11	3834.57	3878.76	1851.41	3347.01	0.397415	0.978203	1	0	0.737712	4	2	1	5	3	5	0.984715	0.9	1			genes significantly and negatively correlating with the SIL IC50 signature of five NSCLC cell lines
212021_s_at	MKI67	658.343	1355.34	1355.41	93.0747	945.573	0.447796	0.999945	1	0	0.675334	4	2	1	5	3	5	0.984581	0.9	1
211833_s_at	BAX	426.463	596.859	589.684	303.851	563.137	0.41846	1	0.975513	0	0.884911	4	1	2	5	3	5	0.984575	1	1
219588_s_at	NCAPG2	789.514	1179.17	1230.56	243.525	872.636	0.553161	0.947935	1	0	0.637375	4	2	1	5	3	5	0.981379	0.9	1
200903_s_at	AHCY	2712.53	3541.32	3208.14	1763.46	2916.61	0.533827	1	0.812595	0	0.648617	4	1	2	5	3	5	0.981321	1	1
205963_s_at	DNAJA3	634.649	813.764	866.78	473.452	779.337	0.409828	0.865212	1	0	0.777684	4	2	1	5	3	5	0.981068	0.9	1
203805_s_at	FANCA	109.811	254.192	198.393	1.62693	188.13	0.428341	1	0.779071	0	0.738436	4	1	2	5	3	5	0.980188	1	1
202580_x_at	FOXM1	391.311	823.6	899.932	41.2339	602.343	0.407684	0.911107	1	0	0.653442	4	2	1	5	3	5	0.978664	0.9	1
47083_at	C7orf26	199.369	309.127	282.158	117.056	234.045	0.428555	1	0.859588	0	0.609092	4	1	2	5	3	5	0.97784	1	1
204333_s_at	AGA	241.011	289.104	324.504	138.786	270.626	0.550431	0.809388	1	0	0.709893	4	2	1	5	3	5	0.977286	0.9	1
214710_s_at	CCNB1	2142	3142.95	3341.51	704.328	2325	0.545155	0.924708	1	0	0.614547	4	2	1	5	3	5	0.976528	0.9	1
202329_at	CSK	387.667	604.713	584.924	193.134	437.559	0.47265	1	0.951919	0	0.593871	4	1	2	5	3	5	0.975052	1	1
204838_s_at	MLH3	134.976	279.594	275.068	46.1334	197.465	0.380546	1	0.980613	0	0.64821	4	1	2	5	3	5	0.974668	1	1
213487_at	MAP2K2	2.33066	3.59116	3.58871	1.37937	2.75152	0.4301	1	0.998892	0	0.62038	4	1	2	5	3	5	0.974213	1	1
203554_x_at	PTTG1	3343.7	4164.22	3895.05	916.657	3591	0.747343	1	0.917116	0	0.823492	4	1	2	5	3	5	0.9742	1	1
213507_s_at	KPNB1	3044.82	5024.75	5535.95	1619.79	4703.28	0.363885	0.869464	1	0	0.787376	4	2	1	5	3	5	0.973827	0.9	1
202840_at	TAF15	801.851	1176.35	1388.25	337.239	1031.62	0.442062	0.798385	1	0	0.660679	4	2	1	5	3	5	0.972123	0.9	1
207828_s_at	CENPF	1213.85	2104.25	2311.2	221.636	1455.48	0.474843	0.90096	1	0	0.590479	4	2	1	5	3	5	0.971946	0.9	1
206792_x_at	PDE4C	459.331	608.748	601.161	391.603	554.092	0.311902	1	0.96506	0	0.748297	4	1	2	5	3	5	0.970465	1	1
203796_s_at	BCL7A	46.6962	79.7312	61.0801	2.99754	53.6284	0.569485	1	0.756937	0	0.659826	4	1	2	5	3	5	0.970056	1	1
209080_x_at	GLRX3	1742.24	3003.48	2812.77	1183.53	2506.37	0.306992	1	0.895211	0	0.726855	4	1	2	5	3	5	0.97003	1	1
209069_s_at	H3F3B;H3F3A	5041.49	7266.2	6234.15	3467.32	6190.95	0.414377	1	0.728328	0	0.716956	4	1	2	5	3	5	0.969565	1	1
210782_x_at	GRIN1	17.7549	22.7552	22.909	14.5575	19.6824	0.382853	0.981584	1	0	0.61365	4	2	1	5	3	5	0.968625	0.9	1
222036_s_at	MCM4	565.928	1127.69	1293	162.544	896.484	0.356833	0.853767	1	0	0.649242	4	2	1	5	3	5	0.968354	0.9	1
204267_x_at	PKMYT1	232.516	398.142	331.561	59.8664	374.281	0.510381	1	0.803175	0	0.929463	4	1	3	5	2	5	0.968092	0.9	1
203510_at	MET	1898.23	3315.63	2596.3	656.405	2318.6	0.466988	1	0.729496	0	0.625067	4	1	2	5	3	5	0.967165	1	1
204098_at	RBMX2	189.954	293.124	261.221	113.128	278.492	0.426821	1	0.822757	0	0.918709	4	1	3	5	2	5	0.967152	0.9	1
213646_x_at	TUBA1B	15683.3	18285	16795.4	13110.9	16613.6	0.497169	1	0.712105	0	0.676968	4	1	2	5	3	5	0.96711	1	1
222037_at	MCM4	170.093	410.578	429.04	47.7327	303.894	0.320897	0.951582	1	0	0.671798	4	2	1	5	3	5	0.967033	0.9	1
202095_s_at	BIRC5	764.946	1329.44	1402.13	166.38	867.871	0.484375	0.941177	1	0	0.567664	4	2	1	5	3	5	0.966968	0.9	1
201755_at	MCM5	180.573	411.545	389.563	78.1175	356.551	0.30728	1	0.934073	0	0.835065	4	1	2	5	3	5	0.9668	1	1
200689_x_at	EEF1G	8941.48	11215.4	10604.1	7877.9	10466.7	0.318676	1	0.816839	0	0.77567	4	1	2	5	3	5	0.966418	1	1
208695_s_at	RPL39	16001.9	18292.4	17869.9	14540.3	16668.5	0.389542	1	0.887396	0	0.567202	4	1	2	5	3	5	0.966313	1	1
211713_x_at	KIAA0101	376.144	800.348	904.841	76.991	587.187	0.361361	0.873778	1	0	0.61629	4	2	1	5	3	5	0.966291	0.9	1
204126_s_at	CDC45L	302.732	686.862	617.415	66.386	419.427	0.380911	1	0.888075	0	0.568984	4	1	2	5	3	5	0.965749	1	1
202904_s_at	LSM5	349.517	505.438	611.067	170.439	491.103	0.406415	0.760276	1	0	0.727743	4	2	1	5	3	5	0.96415	0.9	1
219401_at	XYLT2	85.054	132.301	126.979	44.1952	92.3109	0.463747	1	0.939595	0	0.546113	4	1	2	5	3	5	0.963571	1	1
219116_s_at	DCUN1D2	96.8705	136.029	115.919	39.039	97.2379	0.596263	1	0.792659	0	0.600051	4	1	2	5	3	5	0.962116	1	1
202483_s_at	RANBP1	2912.41	5195.69	4252.72	1663.69	3955.34	0.353545	1	0.733021	0	0.648825	4	1	2	5	3	5	0.962036	1	1
216438_s_at	TMSB4X;TMSL3	13872.8	15859.5	15420.9	10348.3	13580.4	0.639516	1	0.920417	0	0.58646	3	1	2	5	4	5	0.961318	0.9	1
206649_s_at	TFE3	110.936	221.154	222.025	38.0009	143.451	0.396335	0.995267	1	0	0.573023	4	2	1	5	3	5	0.961156	0.9	1
203765_at	GCA	148.758	288.247	228.911	54.3103	187.78	0.403732	1	0.746359	0	0.570538	4	1	2	5	3	5	0.959976	1	1
204652_s_at	NRF1	104.738	121.087	138.215	61.8033	109.469	0.561886	0.775846	1	0	0.623801	4	2	1	5	3	5	0.958797	0.9	1
215595_x_at	215595_x_at	82.1527	177.078	195.782	27.3707	176.463	0.325287	0.888939	1	0	0.885287	4	2	1	5	3	5	0.958688	0.9	1
202588_at	AK1	61.7105	69.5717	78.3974	12.0462	62.8114	0.748506	0.866985	1	0	0.765098	4	2	1	5	3	5	0.957556	0.9	1
205450_at	PHKA1	432.922	735.548	771.101	282.648	720.439	0.307653	0.927213	1	0	0.896281	4	2	1	5	3	5	0.95726	0.9	1
207435_s_at	SRRM2	770.641	1538	1433.94	418.719	1449.26	0.314418	1	0.90703	0	0.920717	4	1	3	5	2	5	0.956828	0.9	1
206621_s_at	EIF4H	3201.65	3928.13	3406.19	1969.32	3294.4	0.629122	1	0.733542	0	0.676472	4	1	2	5	3	5	0.955814	1	1
200980_s_at	PDHA1	2287.77	2860.79	3161.09	1749.41	2572.67	0.381361	0.787275	1	0	0.583177	4	2	1	5	3	5	0.955543	0.9	1
203653_s_at	COIL	295.144	364.819	319.82	227.829	318.922	0.491386	1	0.671516	0	0.664961	4	1	2	5	3	5	0.955061	1	1
201475_x_at	MARS	2234.28	2881.42	2967.25	1421.73	2236.41	0.525745	0.944465	1	0	0.527124	4	2	1	5	3	5	0.954101	0.9	1
203401_at	PRPS2	538.441	1209.92	1041.39	296.006	873.644	0.265271	1	0.815595	0	0.632049	4	1	2	5	3	5	0.95327	1	1
204618_s_at	GABPB2;GABPB1	545.104	635.484	583.363	333.973	526.324	0.700243	1	0.827134	0	0.637957	3	1	2	5	4	5	0.951887	0.9	1
212621_at	TMEM194A	342.761	701.943	742.419	146.799	479.853	0.329005	0.932044	1	0	0.559172	4	2	1	5	3	5	0.951768	0.9	1
220300_at	RGS3	7.85339	23.384	21.2833	3.08654	18.8807	0.23485	1	0.896504	0	0.778135	4	1	2	5	3	5	0.950947	1	1
217885_at	IPO9	1327.62	1674.68	1873.76	882.513	1411.72	0.449037	0.799162	1	0	0.53388	4	2	1	5	3	5	0.94992	0.9	1
217187_at	MUC5AC	28.7239	36.3854	34.3787	2.36902	25.1138	0.77477	1	0.941008	0	0.668642	3	1	2	5	4	5	0.949364	0.9	1
200721_s_at	ACTR1A	535.436	858.558	719.646	381.715	666.808	0.322372	1	0.708684	0	0.597876	4	1	2	5	3	5	0.948769	1	1
207008_at	IL8RB	12.8112	27.7447	18.5339	1.76166	19.3713	0.42526	1	0.645507	0	0.677736	4	1	3	5	2	5	0.94754	0.9	1
206194_at	HOXC4	106.224	174.242	150.165	48.967	110.451	0.45705	1	0.807807	0	0.490792	4	1	2	5	3	5	0.947057	1	1
201603_at	PPP1R12A	669.023	792.445	904.77	529.091	789.802	0.372478	0.701008	1	0	0.693973	4	2	1	5	3	5	0.945368	0.9	1
221552_at	LOC643635;ABHD6	207.492	278.634	246.999	141.11	209.818	0.482694	1	0.769967	0	0.499607	4	1	2	5	3	5	0.945272	1	1
217829_s_at	USP39	563.656	606.948	720.527	274.704	585.299	0.648132	0.745237	1	0	0.696678	4	2	1	5	3	5	0.944865	0.9	1
212825_at	PAXIP1	588.731	1029.3	963.241	418.138	749.036	0.279129	1	0.891912	0	0.541424	4	1	2	5	3	5	0.943847	1	1
213271_s_at	DOPEY1	162.497	249.801	223.721	136.198	213.071	0.231499	1	0.770429	0	0.676681	4	1	2	5	3	5	0.94286	1	1
205198_s_at	ATP7A	114.084	175.969	209.3	70.9003	151.762	0.312022	0.759169	1	0	0.584262	4	2	1	5	3	5	0.942051	0.9	1
220161_s_at	EPB41L4B	721.773	904.629	798.079	141.677	636.564	0.760331	1	0.860345	0	0.648648	3	1	2	5	4	5	0.9407	0.9	1
222130_s_at	FTSJ2	526.544	882.591	677.044	244.149	584.705	0.442319	1	0.678049	0	0.533417	4	1	2	5	3	5	0.939724	1	1
211997_x_at	H3F3B;H3F3A	7127.65	8905.17	7550.04	5011.21	8184.24	0.543519	1	0.651992	0	0.814859	4	1	3	5	2	5	0.939172	0.9	1
200032_s_at	RPL9	12280.5	13888.1	13248.5	9427.84	11772.1	0.639573	1	0.8566	0	0.525588	3	1	2	5	4	5	0.939086	0.9	1
216237_s_at	MCM5	651.788	1325.85	1614.87	271.135	1035.55	0.28328	0.784913	1	0	0.568873	4	2	1	5	3	5	0.938213	0.9	1
216837_at	EPHA5	16.7518	39.5244	45.373	5.44863	26.8483	0.283115	0.853508	1	0	0.536005	4	2	1	5	3	5	0.937896	0.9	1
218308_at	TACC3	519.614	932.423	664.766	155.029	588.77	0.468984	1	0.6557	0	0.557942	4	1	2	5	3	5	0.937786	1	1
218355_at	KIF4A	426.561	983.201	1127.45	109.503	630.879	0.311468	0.858294	1	0	0.512184	4	2	1	5	3	5	0.93759	0.9	1
200801_x_at	ACTB	20550.4	24672.9	22486.4	18440	22139.5	0.33859	1	0.6492	0	0.593544	4	1	2	5	3	5	0.937124	1	1
221548_s_at	ILKAP	504.433	804.908	669.86	264.153	521.72	0.444342	1	0.75026	0	0.47631	4	1	2	5	3	5	0.93708	1	1
205861_at	SPIB	33.1618	40.1309	34.6495	21.6346	32.7852	0.623217	1	0.703649	0	0.602856	3	1	2	5	4	5	0.936879	0.9	1
32811_at	MYO1C	540.006	762.496	697.041	458.116	727.599	0.269039	1	0.784956	0	0.885351	4	1	3	5	2	5	0.936483	0.9	1
204531_s_at	BRCA1	317.124	703.134	876.031	79.1803	512.497	0.298605	0.783025	1	0	0.543787	4	2	1	5	3	5	0.936482	0.9	1
212247_at	NUP205	895.037	1625.15	1789.31	535.13	1190.75	0.286966	0.86911	1	0	0.522748	4	2	1	5	3	5	0.936295	0.9	1
202417_at	KEAP1	763.539	1153.27	836.508	182.761	1017.25	0.598426	1	0.673613	0	0.859847	4	1	3	5	2	5	0.936074	0.9	1
204023_at	RFC4	1358.35	2238.64	1660.79	718.724	1854.37	0.42083	1	0.619815	0	0.747177	4	1	3	5	2	5	0.935434	0.9	1
213383_at	213383_at	91.111	117.397	94.1089	17.9235	85.6077	0.735749	1	0.765886	0	0.680424	3	1	2	5	4	5	0.935229	0.9	1
209054_s_at	WHSC1	312.862	575.586	549.229	128.178	334.286	0.412787	1	0.94109	0	0.460671	4	1	2	5	3	5	0.935028	1	1
202107_s_at	MCM2	1145.32	2264.5	1753.37	578.688	1447.36	0.336118	1	0.696805	0	0.515284	4	1	2	5	3	5	0.934963	1	1
201135_at	ECHS1	2910.41	3950.05	3287.49	1865.43	2958.88	0.501281	1	0.682167	0	0.524532	4	1	2	5	3	5	0.934448	1	1
213806_at	PURA	24.926	33.0413	27.2467	12.6713	24.0042	0.601605	1	0.715533	0	0.556352	3	1	2	5	4	5	0.934326	0.9	1
202705_at	CCNB2	1286.15	1867.22	2491.28	586.306	1770.72	0.367377	0.672405	1	0	0.621748	4	2	1	5	3	5	0.933582	0.9	1
201369_s_at	ZFP36L2	51.8557	117.654	93.6486	31.0688	81.6796	0.240075	1	0.722754	0	0.58452	4	1	2	5	3	5	0.933421	1	1
202985_s_at	BAG5	1762.51	2111.55	1871.02	1307.89	2068.39	0.565687	1	0.700707	0	0.946296	4	1	3	5	2	5	0.933258	0.9	1
218227_at	NUBP2	280.505	323.129	283.336	118.902	308.406	0.791291	1	0.805153	0	0.927909	4	1	3	5	2	5	0.933162	0.9	1
202486_at	AFG3L2	255.796	327.423	354.786	193.287	269.548	0.387055	0.830569	1	0	0.472207	4	2	1	5	3	5	0.933081	0.9	1
211565_at	SH3GL3	19.3786	33.0588	36.046	13.4122	25.1992	0.263606	0.86802	1	0	0.52077	4	2	1	5	3	5	0.931345	0.9	1
204649_at	TROAP	152.418	365.083	470.998	34.8123	277.908	0.269623	0.757179	1	0	0.557322	4	2	1	5	3	5	0.929884	0.9	1
209413_at	B4GALT2	147.804	157.234	152.373	63.1261	139.143	0.899796	1	0.948347	0	0.807763	3	1	2	5	4	5	0.928802	0.9	1
219248_at	THUMPD2	222.921	400.472	522.416	99.2943	338.157	0.292178	0.711799	1	0	0.564525	4	2	1	5	3	5	0.926955	0.9	1
213344_s_at	H2AFX	102.444	143.997	111.542	60.1319	127.37	0.504526	1	0.613009	0	0.801741	4	1	3	5	2	5	0.92683	0.9	1
220990_s_at	TMEM49;MIRN21	2258.17	5007.62	4642.77	1405.54	3191.33	0.236705	1	0.898711	0	0.495766	4	1	2	5	3	5	0.924611	1	1
203754_s_at	BRF1	76.5728	142.324	120.787	54.0782	133.541	0.254908	1	0.755943	0	0.900471	4	1	3	5	2	5	0.924549	0.9	1
217169_at	IGHA1	9.33871	24.96	20.7653	6.19811	18.1933	0.167393	1	0.776424	0	0.639338	4	1	2	5	3	5	0.924326	1	1
205927_s_at	CTSE	17.3742	26.9363	19.9369	4.361	16.1675	0.576435	1	0.689953	0	0.522983	3	1	2	5	4	5	0.923692	0.9	1
208808_s_at	HMGB2	1900.99	3619.58	2530.67	363.377	1956.41	0.47221	1	0.665589	0	0.48923	4	1	2	5	3	5	0.923061	1	1
212639_x_at	TUBA1B	15310.2	18309.2	19042.7	14174.3	16682.1	0.233321	0.849334	1	0	0.515118	4	2	1	5	3	5	0.923042	0.9	1
211072_x_at	TUBA1B	14085.4	17191.4	15646.1	11744.6	14185.5	0.429757	1	0.716292	0	0.448135	4	1	2	5	3	5	0.922973	1	1
203033_x_at	FH	1004.01	2300.96	1876.58	646.38	1523.39	0.216145	1	0.743512	0	0.53005	4	1	2	5	3	5	0.922881	1	1
222077_s_at	RACGAP1	796.85	1843.57	2255.29	419.806	1515.29	0.205419	0.775689	1	0	0.596837	4	2	1	5	3	5	0.922525	0.9	1
217753_s_at	RPS26;LOC644191;LOC728937	8562.62	10146.1	9964.74	8310.94	9523.69	0.137143	1	0.901175	0	0.660842	4	1	2	5	3	5	0.921667	1	1
208445_s_at	BAZ1B	480.438	928.82	812.697	336.291	615.475	0.243274	1	0.804021	0	0.471174	4	1	2	5	3	5	0.920444	1	1
201499_s_at	USP7	911.009	1356.17	1384.58	792.354	1110.81	0.200354	0.952028	1	0	0.537727	4	2	1	5	3	5	0.920421	0.9	1
211750_x_at	TUBA1C	11008.9	12927.2	12816.9	10378	11606.9	0.247489	1	0.956732	0	0.482073	4	1	2	5	3	5	0.919657	1	1
219544_at	C13orf34	181.875	255.553	248.418	164.862	251.282	0.187593	1	0.921326	0	0.952906	4	1	3	5	2	5	0.919601	0.9	1
210477_x_at	MAPK8	58.4084	78.1266	73.2863	12.5616	45.5736	0.699257	1	0.926176	0	0.5035	3	1	2	5	4	5	0.91953	0.9	1
208974_x_at	KPNB1	2998.52	4752.2	5777.52	1855.45	3807.68	0.291446	0.738577	1	0	0.497755	4	2	1	5	3	5	0.919224	0.9	1
213053_at	KIAA0841	59.0438	79.3286	87.7868	52.4211	77.1192	0.187263	0.760836	1	0	0.698363	4	2	1	5	3	5	0.91919	0.9	1
218898_at	FAM57A	400.127	736.313	570.617	122.414	387.436	0.452376	1	0.730092	0	0.431703	3	1	2	5	4	5	0.918101	0.9	1
200815_s_at	PAFAH1B1	1259.87	1573.15	1393.9	1100.06	1345.07	0.3378	1	0.621108	0	0.517893	4	1	2	5	3	5	0.918057	1	1
205436_s_at	H2AFX	1338.23	3116.4	2764.66	937.218	2930.45	0.18402	1	0.838591	0	0.91467	4	1	3	5	2	5	0.916555	0.9	1
204317_at	GTSE1	84.7923	222.83	177.76	39.3314	210.494	0.247745	1	0.754385	0	0.932773	4	1	3	5	2	5	0.915881	0.9	1
216532_x_at	LOC728344	144.523	179.684	162.944	123.279	178.783	0.376633	1	0.703218	0	0.984026	4	1	3	5	2	5	0.915291	0.9	1
202616_s_at	MECP2	194.198	353.854	266.265	133.988	271.955	0.273849	1	0.601626	0	0.627505	4	1	3	5	2	5	0.915138	0.9	1
204767_s_at	FEN1	1080.39	2107.01	2408.25	783.799	1677.23	0.182579	0.814559	1	0	0.54999	4	2	1	5	3	5	0.914765	0.9	1
207165_at	HMMR	541.234	1388.92	1551.94	374.028	1096	0.141951	0.861603	1	0	0.612925	4	2	1	5	3	5	0.913994	0.9	1
217865_at	RNF130	570.778	1065.65	923.97	432.05	729.344	0.218952	1	0.776389	0	0.469214	4	1	2	5	3	5	0.913603	1	1
203437_at	TMEM11	477.615	647.026	622.219	406.567	507.096	0.295468	1	0.896835	0	0.418071	4	1	2	5	3	5	0.912396	1	1
214213_x_at	LMNA	45.7853	107.543	72.6436	12.5482	96.6075	0.349883	1	0.632618	0	0.884883	4	1	3	5	2	5	0.911332	0.9	1
204011_at	SPRY2	215.333	458.891	458.533	144.218	295.61	0.225997	1	0.998862	0	0.481109	4	1	2	5	3	5	0.911145	1	1
218139_s_at	C14orf108	1236.19	1452.61	1318.49	1122.2	1293.45	0.344996	1	0.59408	0	0.518295	4	1	2	5	3	5	0.910368	1	1
213719_s_at	SMARCA4	16.7717	32.0283	19.1704	1.62876	26.0665	0.498131	1	0.577036	0	0.803885	4	1	3	5	2	5	0.910204	0.9	1
204825_at	MELK	1306.54	1808.41	2560.59	467.196	1558.13	0.400949	0.640689	1	0	0.521132	4	2	1	5	3	5	0.910164	0.9	1
207198_s_at	LIMS1	879.235	429.712	843.01	1483.95	871.433	0.426396	0	0.392035	1	0.418996	2	5	4	1	3	5	-0.910195	-1	1
217208_s_at	DLG1	451.625	153.589	62.7318	514.38	196.412	0.861053	0.201168	0	1	0.295983	2	4	5	1	3	5	-0.910439	-0.9	1
218618_s_at	FNDC3B	3111.62	2061.78	2856.65	7022.98	4111.75	0.21161	0	0.160217	1	0.4132	3	5	4	1	2	5	-0.910459	-0.9	1
211963_s_at	ARPC5	3176.8	2104.95	3104.7	5632.12	3625.35	0.303884	0	0.283443	1	0.431054	3	5	4	1	2	5	-0.910587	-0.9	1
210742_at	CDC14A	33.5276	7.1853	11.8785	36.7256	17.4293	0.891741	0	0.158874	1	0.34678	2	5	4	1	3	5	-0.910887	-1	1
203748_x_at	RBMS1	1868.26	957.248	1743.61	2996.52	1205.4	0.446734	0	0.385609	1	0.121687	2	5	3	1	4	5	-0.912002	-0.9	1
209772_s_at	CD24	3320.82	738.486	1305.84	3971.44	889.386	0.798754	0	0.175491	1	0.0466756	2	5	3	1	4	5	-0.912445	-0.9	1
218538_s_at	MRS2	587.401	390.885	430.706	668.821	553.339	0.707055	0	0.143274	1	0.584501	2	5	4	1	3	5	-0.912468	-1	1
216048_s_at	RHOBTB3	624.95	315.151	39.9684	857.61	403.544	0.71545	0.336557	0	1	0.444664	2	4	5	1	3	5	-0.912602	-0.9	1
215287_at	215287_at	179.405	112.515	148.803	222.902	116.78	0.605959	0	0.328734	1	0.0386368	2	5	3	1	4	5	-0.912768	-0.9	1
212835_at	FAM175B	341.59	232.178	247.504	399.745	331.728	0.652945	0	0.0914619	1	0.594091	2	5	4	1	3	5	-0.913116	-1	1
203685_at	BCL2	3.56237	1.13617	2.04334	100.307	8.2617	0.0244649	0	0.00914755	1	0.0718511	3	5	4	1	2	5	-0.913154	-0.9	1
210437_at	MAGEA9B;MAGEA9	44.0523	2.45919	4.28077	1687.72	4.29152	0.0246805	0	0.00108089	1	0.00108727	2	5	4	1	3	5	-0.913707	-1	1
220076_at	ANKH	74.2442	37.6034	47.5304	80.0439	50.7984	0.863345	0	0.233904	1	0.310906	2	5	4	1	3	5	-0.914461	-1	1
206580_s_at	EFEMP2	102.413	94.815	37.681	1272.1	97.4648	0.0524392	0.0462841	0	1	0.0484307	2	4	5	1	3	5	-0.915042	-0.9	1
205168_at	DDR2	25.7942	3.82872	15.4	627.966	55.3261	0.0351933	0	0.0185396	1	0.0825097	3	5	4	1	2	5	-0.915526	-0.9	1
209942_x_at	MAGEA3	314.401	15.7299	251.11	5958.96	36.3142	0.050254	0	0.0396047	1	0.00346349	2	5	3	1	4	5	-0.915565	-0.9	1
220046_s_at	CCNL1	1196.47	983.621	1168.36	1435.53	1075.68	0.471	0	0.408797	1	0.203711	2	5	3	1	4	5	-0.915806	-0.9	1
209144_s_at	CBFA2T2	126.4	33.0104	54.2649	141.492	57.9652	0.86088	0	0.195927	1	0.230037	2	5	4	1	3	5	-0.916221	-1	1
216689_x_at	ARHGAP1	264.253	168.271	56.0835	364.493	175.72	0.674978	0.363761	0	1	0.387914	2	4	5	1	3	5	-0.916327	-0.9	1
210333_at	NR5A1	4.50763	1.29575	2.09549	5.05639	2.32361	0.854078	0	0.212661	1	0.27332	2	5	4	1	3	5	-0.918924	-1	1
215992_s_at	RAPGEF2	128.211	42.2901	49.5841	147.334	90.3524	0.817952	0	0.0694376	1	0.457545	2	5	4	1	3	5	-0.91991	-1	1
208018_s_at	HCK	7.56028	0.672582	7.37276	29.1697	1.07658	0.241698	0	0.235118	1	0.0141768	2	5	3	1	4	5	-0.919915	-0.9	1
217043_s_at	MFN1	1012.03	857.821	426.776	1632.57	901.896	0.485368	0.357478	0	1	0.394031	2	4	5	1	3	5	-0.920291	-0.9	1
202297_s_at	RER1	1370.45	971.876	1207.22	2368.09	1612.97	0.285468	0	0.168559	1	0.459166	3	5	4	1	2	5	-0.920721	-0.9	1
221912_s_at	CCDC28B	31.7982	4.60491	5.36949	372.808	86.6037	0.0738541	0	0.00207652	1	0.2227	3	5	4	1	2	5	-0.920768	-0.9	1
202033_s_at	RB1CC1	1966.76	1347.38	1415.28	2749.87	2133.54	0.441629	0	0.0484139	1	0.560546	3	5	4	1	2	5	-0.9208	-0.9	1
217592_at	ZSWIM1	41.4097	10.8891	2.89788	60.6177	34.9379	0.66722	0.138448	0	1	0.555096	2	4	5	1	3	5	-0.921162	-0.9	1
214197_s_at	SETDB1	101.916	53.3578	55.4807	114.921	53.5974	0.788754	0	0.0344833	1	0.00389194	2	5	3	1	4	5	-0.921863	-0.9	1
219487_at	BBS10	125.511	113.01	121.623	296.806	135.565	0.0680156	0	0.0468617	1	0.122718	3	5	4	1	2	5	-0.922105	-0.9	1
217677_at	PLEKHA2	141.227	48.8356	64.24	156.551	74.4055	0.857736	0	0.14301	1	0.237384	2	5	4	1	3	5	-0.92221	-1	1
202647_s_at	NRAS	934.885	386.994	444.337	4124.7	1643.22	0.146585	0	0.0153418	1	0.336095	3	5	4	1	2	5	-0.924227	-0.9	1
219688_at	BBS7	133.865	63.2798	117.335	195.155	98.5768	0.535242	0	0.409897	1	0.267655	2	5	3	1	4	5	-0.924801	-0.9	1
217298_at	217298_at	2.00125	0.996125	1.40092	16.7314	2.45408	0.0638772	0	0.0257253	1	0.0926552	3	5	4	1	2	5	-0.925048	-0.9	1
219074_at	TMEM184C	364.838	232.886	335.781	569.176	384.189	0.392376	0	0.305971	1	0.449918	3	5	4	1	2	5	-0.925309	-0.9	1
210455_at	C10orf28	150.922	49.4378	55.084	168.614	75.22	0.851548	0	0.0473769	1	0.216337	2	5	4	1	3	5	-0.925985	-1	1
214773_x_at	TIPRL	690.613	420.775	466.121	750.698	466.418	0.817882	0	0.137444	1	0.138344	2	5	4	1	3	5	-0.926352	-1	1
214658_at	TMED7	1075.2	589.124	843.975	1392.49	651.104	0.605049	0	0.317229	1	0.0771504	2	5	3	1	4	5	-0.92638	-0.9	1
205029_s_at	FABP7	8.00482	1.39239	4.82725	13.5312	1.51582	0.544735	0	0.282965	1	0.0101682	2	5	3	1	4	5	-0.926736	-0.9	1
213355_at	ST3GAL6	91.5647	4.1304	2.60148	139.273	75.6291	0.650927	0.0111868	0	1	0.534329	2	4	5	1	3	5	-0.926954	-0.9	1
203810_at	DNAJB4	540.857	178.778	540.139	1256.83	427.612	0.335864	0	0.335198	1	0.230818	2	5	3	1	4	5	-0.927647	-0.9	1
214373_at	214373_at	170.801	109.209	156.43	291.325	110.698	0.338202	0	0.259291	1	0.00817611	2	5	3	1	4	5	-0.9283	-0.9	1
37012_at	CAPZB	2636.51	1563.41	1872.87	2922.56	1808.31	0.789538	0	0.227686	1	0.180186	2	5	3	1	4	5	-0.928643	-0.9	1
203111_s_at	PTK2B	4.44445	1.75768	1.68199	42.6772	2.31549	0.0673849	0.00184631	0	1	0.015453	2	4	5	1	3	5	-0.928942	-0.9	1
207153_s_at	GLMN	527.684	274.029	424.463	1609.47	727.424	0.189941	0	0.112647	1	0.33951	3	5	4	1	2	5	-0.929672	-0.9	1
202300_at	HBXIP	3126.07	1575.84	3028.75	6674.63	3313.96	0.304039	0	0.284952	1	0.340889	3	5	4	1	2	5	-0.929826	-0.9	1
206373_at	ZIC1	50.9202	11.9761	16.7032	554.002	26.0603	0.0718492	0	0.00872117	1	0.0259844	2	5	4	1	3	5	-0.92987	-1	1
218261_at	AP1M2	1215.5	652.188	901.829	4426.35	1765.27	0.149255	0	0.0661447	1	0.294922	3	5	4	1	2	5	-0.930129	-0.9	1
207654_x_at	DR1	684.62	366.386	373.246	1781.74	938.44	0.224844	0	0.00484684	1	0.404177	3	5	4	1	2	5	-0.931343	-0.9	1
202299_s_at	HBXIP	4067.97	2278.59	4014.43	7694.09	3396.34	0.330418	0	0.320532	1	0.206398	2	5	3	1	4	5	-0.931562	-0.9	1
206972_s_at	GPR161	43.3416	9.80432	36.8526	99.0731	16.8507	0.375689	0	0.302998	1	0.0789344	2	5	3	1	4	5	-0.931635	-0.9	1
220994_s_at	STXBP6	135.779	1.60918	53.0396	221.601	2.11582	0.609885	0	0.233783	1	0.00230299	2	5	3	1	4	5	-0.931727	-0.9	1
203285_s_at	HS2ST1	289.058	101.971	260.783	781.842	127.468	0.27518	0	0.233591	1	0.0375027	2	5	3	1	4	5	-0.932222	-0.9	1
212959_s_at	GNPTAB	944.027	557.174	789.764	1163.2	768.38	0.638344	0	0.383795	1	0.34851	2	5	3	1	4	5	-0.933009	-0.9	1
209363_s_at	MED21	689.679	284.447	566.417	3902.63	709.693	0.111999	0	0.0779314	1	0.11753	3	5	4	1	2	5	-0.933038	-0.9	1
221007_s_at	FIP1L1	287.382	180.287	251.495	368.867	221.146	0.567902	0	0.377601	1	0.216667	2	5	3	1	4	5	-0.933198	-0.9	1
214595_at	KCNG1	184.027	1.88582	93.1658	267.803	114.637	0.684955	0	0.343265	1	0.424009	2	5	4	1	3	5	-0.93402	-1	1
210932_s_at	RNF6	120.605	8.48545	65.196	187.605	96.3866	0.625948	0	0.316607	1	0.49074	2	5	4	1	3	5	-0.934161	-1	1
201936_s_at	EIF4G3	292.098	142.777	281.101	1035.98	301.906	0.167175	0	0.154863	1	0.178155	3	5	4	1	2	5	-0.934693	-0.9	1
221133_s_at	CLDN18	2.03477	0.734228	1.0242	15.323	1.61178	0.0891468	0	0.0198764	1	0.0601526	2	5	4	1	3	5	-0.934975	-1	1
221762_s_at	PCIF1	184.749	172.302	165.288	345.539	172.934	0.107966	0.0389124	0	1	0.0424186	2	4	5	1	3	5	-0.935828	-0.9	1
209537_at	EXTL2	691.928	375.553	471.383	3434.56	861.666	0.103424	0	0.0313272	1	0.158912	3	5	4	1	2	5	-0.935856	-0.9	1
209401_s_at	SLC12A4	118.09	48.2753	19.6287	148.944	57.6834	0.761405	0.221525	0	1	0.294278	2	4	5	1	3	5	-0.936238	-0.9	1
207157_s_at	GNG5	6041.86	3810.69	5932.99	11156.4	5611.46	0.303738	0	0.288917	1	0.245146	2	5	3	1	4	5	-0.936969	-0.9	1
206772_at	PTH2R	2.95167	1.14989	1.76743	18.8698	2.43437	0.101681	0	0.0348501	1	0.072488	2	5	4	1	3	5	-0.937034	-1	1
221711_s_at	C19orf62	1550.93	1140.17	641.568	2493.03	1477.22	0.491159	0.269302	0	1	0.451347	2	4	5	1	3	5	-0.938081	-0.9	1
218706_s_at	GRAMD3	1054.3	612.148	60.9936	1795.73	750.514	0.572598	0.317717	0	1	0.397478	2	4	5	1	3	5	-0.938107	-0.9	1
219182_at	FLJ22167	231.419	124.876	201.182	466.091	130.421	0.312246	0	0.22363	1	0.0162508	2	5	3	1	4	5	-0.938497	-0.9	1
210436_at	CCT8	36.9947	6.3653	15.8031	45.7067	18.36	0.778554	0	0.239895	1	0.304887	2	5	4	1	3	5	-0.938828	-1	1
219295_s_at	PCOLCE2	874.373	121.804	786.534	4248.11	728.359	0.182383	0	0.161096	1	0.146997	2	5	3	1	4	5	-0.938896	-0.9	1
209089_at	RAB5A	3216.75	2631.29	3094.97	4304.72	2777.99	0.349856	0	0.277084	1	0.0876643	2	5	3	1	4	5	-0.939306	-0.9	1
209187_at	DR1	1001.11	818.816	904.347	2335.78	941.297	0.12017	0	0.056383	1	0.0807409	2	5	4	1	3	5	-0.939708	-1	1
209198_s_at	SYT11	52.1302	12.2482	40.2423	242.243	66.7741	0.173404	0	0.121716	1	0.237074	3	5	4	1	2	5	-0.939813	-0.9	1
213038_at	RNF19B	382.184	177.894	158.376	442.946	257.567	0.786478	0.0685877	0	1	0.348565	2	4	5	1	3	5	-0.939942	-0.9	1
221650_s_at	MED18;LOC100133916	270.554	87.1745	37.3706	348.242	162.125	0.750096	0.160207	0	1	0.401305	2	4	5	1	3	5	-0.94042	-0.9	1
213335_s_at	ST3GAL6	33.8039	2.68111	3.31198	46.0371	2.80837	0.717843	0	0.0145509	1	0.00293524	2	5	3	1	4	5	-0.940969	-0.9	1
36612_at	FAM168A	268.22	176.679	225.3	370.286	179.637	0.472819	0	0.251132	1	0.0152784	2	5	3	1	4	5	-0.941378	-0.9	1
206966_s_at	KLF12	49.0649	33.1724	22.3729	68.3933	44.1901	0.580004	0.234668	0	1	0.474077	2	4	5	1	3	5	-0.942478	-0.9	1
208047_s_at	NAB1	217.061	39.3788	174.31	498.335	91.2985	0.387144	0	0.293996	1	0.113126	2	5	3	1	4	5	-0.942614	-0.9	1
221473_x_at	SERINC3	2715.07	1567.54	977.646	4407.71	2683.79	0.506528	0.171978	0	1	0.497409	2	4	5	1	3	5	-0.942766	-0.9	1
220969_s_at	220969_s_at	112.555	72.397	68.2116	152.647	111.4	0.525175	0.0495693	0	1	0.511496	2	4	5	1	3	5	-0.942918	-0.9	1
222312_s_at	222312_s_at	80.7416	5.69278	41.1685	193.881	94.8814	0.398797	0	0.188512	1	0.473933	3	5	4	1	2	5	-0.943091	-0.9	1
202325_s_at	ATP5J	3818.96	2572.52	3447	4974.1	3276.88	0.519008	0	0.364127	1	0.29329	2	5	3	1	4	5	-0.944084	-0.9	1
201096_s_at	ARF4	4333.16	2569.55	1921.8	5549.06	3606.36	0.664788	0.178578	0	1	0.464417	2	4	5	1	3	5	-0.944403	-0.9	1
211688_x_at	KIR3DL2;LOC727787	2.39305	1.12372	1.42394	11.4669	2.2251	0.122721	0	0.0290259	1	0.106484	2	5	4	1	3	5	-0.945063	-1	1
214441_at	STX6	113.148	85.2807	103.587	147.126	111.781	0.450597	0	0.296001	1	0.428493	2	5	4	1	3	5	-0.945189	-1	1
209181_s_at	RABGGTB	1481.34	1305.41	1402.34	2456.96	1426.29	0.152777	0	0.0841735	1	0.104972	2	5	4	1	3	5	-0.945774	-1	1
208139_s_at	208139_s_at	3.48809	0.66475	2.77035	15.4204	2.85735	0.19134	0	0.142698	1	0.148594	2	5	4	1	3	5	-0.946385	-1	1
202741_at	PRKACB	1369.37	535.593	1066.98	3098.59	1536.85	0.325313	0	0.20733	1	0.390659	3	5	4	1	2	5	-0.94642	-0.9	1
210708_x_at	CASP10	34.0779	5.01032	4.53241	45.477	6.50761	0.721597	0.0116721	0	1	0.0482408	2	4	5	1	3	5	-0.946991	-0.9	1
203950_s_at	CLCN6	141.207	71.3702	126.787	382.928	110.959	0.224154	0	0.17787	1	0.127067	2	5	3	1	4	5	-0.947001	-0.9	1
212731_at	ANKRD46	325.744	108.43	240.747	593.174	322.638	0.448307	0	0.272963	1	0.441899	2	5	4	1	3	5	-0.947143	-1	1
218685_s_at	SMUG1	116.84	57.7793	106.173	296.573	91.5402	0.247329	0	0.202659	1	0.141381	2	5	3	1	4	5	-0.947395	-0.9	1
202229_s_at	CHERP	5.97813	1.36215	2.1939	30.8231	8.18958	0.156681	0	0.0282323	1	0.231745	3	5	4	1	2	5	-0.947468	-0.9	1
202147_s_at	IFRD1	707.847	605.905	434.056	1013.62	628.913	0.472409	0.296514	0	1	0.336213	2	4	5	1	3	5	-0.94779	-0.9	1
214374_s_at	PPFIBP1	251.054	151.933	118.79	1060.94	183.887	0.140385	0.0351781	0	1	0.0690941	2	4	5	1	3	5	-0.94783	-0.9	1
213247_at	SVEP1	103.528	3.23415	11.5905	814.326	83.3488	0.123653	0	0.0103026	1	0.0987738	2	5	4	1	3	5	-0.947901	-1	1
221499_s_at	STX16	895.235	588.459	413.872	1114.19	630.091	0.687349	0.249297	0	1	0.308744	2	4	5	1	3	5	-0.948132	-0.9	1
65517_at	AP1M2	746.759	395.146	481.039	2794.88	847.327	0.146522	0	0.0357927	1	0.18843	3	5	4	1	2	5	-0.948134	-0.9	1
216942_s_at	CD58	641.224	304.724	463.673	2390.13	678.953	0.161359	0	0.0762197	1	0.179451	3	5	4	1	2	5	-0.948403	-0.9	1
218466_at	TBC1D17	406.106	121.259	144.997	489.178	203.524	0.774211	0	0.0645196	1	0.223595	2	5	4	1	3	5	-0.949082	-1	1
200867_at	RNF114	669.471	477.741	481.591	748.583	488.107	0.707904	0	0.0142149	1	0.0382732	2	5	4	1	3	5	-0.949205	-1	1
210046_s_at	IDH2	2042.77	1080.04	556.212	2850.33	1520.42	0.647987	0.228335	0	1	0.420296	2	4	5	1	3	5	-0.949318	-0.9	1
202963_at	RFX5	1705.39	1157.12	1167.78	2087.51	1604.38	0.589291	0	0.0114576	1	0.480723	2	5	4	1	3	5	-0.949378	-1	1
219608_s_at	FBXO38	203.597	58.8657	61.594	257.885	135.309	0.727222	0	0.0137087	1	0.3841	2	5	4	1	3	5	-0.949769	-1	1
213607_x_at	NADK	529.323	189.096	177.339	638.952	266.589	0.762509	0.0254694	0	1	0.193344	2	4	5	1	3	5	-0.94979	-0.9	1
203284_s_at	HS2ST1	1294.91	383.339	758.928	2169.97	402.024	0.510218	0	0.210222	1	0.0104582	2	5	3	1	4	5	-0.950384	-0.9	1
206902_s_at	ENDOGL1	88.4065	12.3691	31.0349	112.817	43.3329	0.756983	0	0.185826	1	0.308257	2	5	4	1	3	5	-0.950388	-1	1
206854_s_at	MAP3K7	460.407	364.763	438.032	668.891	405.065	0.314486	0	0.240915	1	0.132517	2	5	3	1	4	5	-0.951397	-0.9	1
215596_s_at	ZNF294	705.708	515.814	661.992	984.384	638.236	0.405263	0	0.311966	1	0.261267	2	5	3	1	4	5	-0.951479	-0.9	1
204554_at	PPP1R3D	551.296	149.432	98.6567	713.086	318.387	0.736682	0.0826381	0	1	0.357617	2	4	5	1	3	5	-0.951604	-0.9	1
209197_at	SYT11	60.1243	19.7266	48.1883	203.839	56.9091	0.219419	0	0.154589	1	0.201955	2	5	4	1	3	5	-0.951643	-1	1
213780_at	TCHH	74.7149	6.83751	15.0161	469.984	21.8179	0.146557	0	0.0176588	1	0.0323448	2	5	4	1	3	5	-0.951745	-1	1
214383_x_at	KLHDC3	1256.92	942.96	310.167	3507.48	1132.77	0.296109	0.197914	0	1	0.257279	2	4	5	1	3	5	-0.952051	-0.9	1
209936_at	RBM5	83.5169	38.1819	26.0474	110.926	62.3011	0.677079	0.142963	0	1	0.427124	2	4	5	1	3	5	-0.952367	-0.9	1
219802_at	PYROXD1	397.235	140.635	314.776	1062.76	210.621	0.27827	0	0.188847	1	0.0758964	2	5	3	1	4	5	-0.952858	-0.9	1
202296_s_at	RER1	2023.3	1156.46	927.524	2826.88	1828.67	0.57692	0.120533	0	1	0.474448	2	4	5	1	3	5	-0.9534	-0.9	1
221459_at	TAAR5	23.9849	3.5104	8.21527	37.8056	3.54605	0.597008	0	0.137187	1	0.0010395	2	5	3	1	4	5	-0.953455	-0.9	1
202662_s_at	ITPR2	386.664	64.5313	57.5653	2320.16	142.105	0.145452	0.00307877	0	1	0.037364	2	4	5	1	3	5	-0.953587	-0.9	1
220363_s_at	ELMO2	252.59	112.229	136.478	374.097	240.844	0.535999	0	0.0926001	1	0.491144	2	5	4	1	3	5	-0.954067	-1	1
212501_at	CEBPB	5573.79	2956.14	3981.53	6747.86	4007.95	0.69036	0	0.270429	1	0.277397	2	5	4	1	3	5	-0.954199	-1	1
202260_s_at	STXBP1	1032.05	436.981	822.205	2896.13	653.235	0.241982	0	0.156649	1	0.0879386	2	5	3	1	4	5	-0.954442	-0.9	1
200970_s_at	SERP1	1193.75	677.593	1017.85	2346.54	803.634	0.309271	0	0.203875	1	0.0755213	2	5	3	1	4	5	-0.954576	-0.9	1
217950_at	NOSIP	1019.13	667.985	707.506	1272.63	958.475	0.580746	0	0.0653623	1	0.480431	2	5	4	1	3	5	-0.954593	-1	1
208454_s_at	PGCP	134.227	38.7222	26.8406	171.905	59.0743	0.740267	0.0819057	0	1	0.222203	2	4	5	1	3	5	-0.954843	-0.9	1
214285_at	FABP3	31.3677	2.05577	2.24799	191.553	35.66	0.154683	0	0.00101437	1	0.177334	3	5	4	1	2	5	-0.955075	-0.9	1
202375_at	SEC24D	314.78	238.589	115.72	615.799	275.189	0.398057	0.245699	0	1	0.318888	2	4	5	1	3	5	-0.955371	-0.9	1
220039_s_at	CDKAL1	66.1889	22.897	20.5402	98.4504	56.4017	0.585914	0.0302502	0	1	0.460293	2	4	5	1	3	5	-0.955882	-0.9	1
204345_at	COL16A1	133.786	45.167	51.9171	163.591	73.505	0.74832	0	0.0569994	1	0.239293	2	5	4	1	3	5	-0.956395	-1	1
218409_s_at	DNAJC1	413.436	156.423	206.299	533.975	320.572	0.680735	0	0.132104	1	0.434772	2	5	4	1	3	5	-0.956505	-1	1
203000_at	STMN2	1.87613	1.32269	1.26989	2.15473	1.33948	0.685141	0.0596718	0	1	0.078647	2	4	5	1	3	5	-0.956611	-0.9	1
212652_s_at	SNX4	693.38	501.574	572.155	1362.69	506.642	0.222741	0	0.0819646	1	0.00588539	2	5	3	1	4	5	-0.956809	-0.9	1
208879_x_at	PRPF6	547.803	275.282	130.432	899.654	471.685	0.542588	0.188307	0	1	0.443634	2	4	5	1	3	5	-0.957178	-0.9	1
201534_s_at	UBL3	479.713	215.578	375.52	1387.78	362.939	0.225332	0	0.136446	1	0.125713	2	5	3	1	4	5	-0.957421	-0.9	1
214310_s_at	ZFPL1	186.977	37.3878	53.5472	262.737	134.819	0.663811	0	0.0717083	1	0.432357	2	5	4	1	3	5	-0.957749	-1	1
208607_s_at	SAA2;SAA1	54.9962	27.2936	3.97374	127.302	53.1713	0.413713	0.189088	0	1	0.398916	2	4	5	1	3	5	-0.957801	-0.9	1
222157_s_at	WDR48	242.57	156.259	190.575	606.114	238.363	0.191864	0	0.0762824	1	0.182512	2	5	4	1	3	5	-0.958093	-1	1
211360_s_at	ITPR2	58.6894	4.33552	5.61196	339.133	17.3161	0.162349	0	0.00381257	1	0.0387714	2	5	4	1	3	5	-0.958189	-1	1
202194_at	TMED5	3086.81	2067.39	2388.21	7729.5	2596.53	0.180042	0	0.0566609	1	0.0934528	2	5	4	1	3	5	-0.958396	-1	1
221643_s_at	RERE	90.0682	51.9022	58.1768	121.091	84.7738	0.551621	0	0.0906881	1	0.4751	2	5	4	1	3	5	-0.958672	-1	1
218483_s_at	C11orf60	311.377	175.19	264.802	536.793	299.129	0.37662	0	0.247819	1	0.342749	2	5	4	1	3	5	-0.95943	-1	1
208918_s_at	NADK	1470.69	643.519	435.661	1898.78	851.468	0.707413	0.142065	0	1	0.284192	2	4	5	1	3	5	-0.959597	-0.9	1
39318_at	TCL1A	5.12925	1.91103	2.00731	21.2185	3.20512	0.166683	0	0.00498667	1	0.0670254	2	5	4	1	3	5	-0.960601	-1	1
206906_at	ICAM5	50.7903	11.9412	28.751	201.351	41.3633	0.205106	0	0.0887483	1	0.155336	2	5	4	1	3	5	-0.961126	-1	1
219130_at	CCDC76	355.85	130.21	286.015	902.427	283.842	0.292198	0	0.201763	1	0.198949	2	5	3	1	4	5	-0.961165	-0.9	1
204843_s_at	PRKAR2A	112.509	59.7857	37.992	193.022	106.085	0.480662	0.140577	0	1	0.439225	2	4	5	1	3	5	-0.961325	-0.9	1
202732_at	PKIG	726.781	442.597	542.434	1744.12	752.246	0.218347	0	0.0767078	1	0.237913	3	5	4	1	2	5	-0.961495	-0.9	1
205358_at	GRIA2	1.6907	0.672219	1.08267	5.44656	1.05667	0.213324	0	0.0859702	1	0.0805244	2	5	3	1	4	5	-0.961757	-0.9	1
220843_s_at	WDSOF1	76.9912	35.0292	40.8994	97.5251	60.4723	0.671436	0	0.0939294	1	0.407116	2	5	4	1	3	5	-0.962259	-1	1
209034_at	PNRC1	1273.62	427.383	565.701	1664.77	582.191	0.68389	0	0.111782	1	0.125109	2	5	4	1	3	5	-0.962441	-1	1
203580_s_at	SLC7A6	1309.45	459.888	732.863	1765.42	990.956	0.65074	0	0.209091	1	0.406783	2	5	4	1	3	5	-0.963181	-1	1
221901_at	LL22NC03-75B3.6	32.773	13.1379	11.2139	41.854	20.6117	0.703624	0.0627935	0	1	0.306716	2	4	5	1	3	5	-0.963457	-0.9	1
204885_s_at	MSLN	464.602	3.31294	45.5609	748.116	24.5821	0.619344	0	0.0567237	1	0.0285568	2	5	3	1	4	5	-0.9645	-0.9	1
208443_x_at	SHOX2	87.8077	22.6429	33.2845	365.502	53.8526	0.190063	0	0.0310378	1	0.0910278	2	5	4	1	3	5	-0.964519	-1	1
220411_x_at	PODNL1	49.4308	11.626	17.9627	76.4285	40.6767	0.583385	0	0.0977848	1	0.448296	2	5	4	1	3	5	-0.964656	-1	1
210988_s_at	PRUNE	217.037	128.386	128.844	435.117	231.379	0.289019	0	0.00149317	1	0.335776	3	5	4	1	2	5	-0.966564	-0.9	1
212633_at	KIAA0776	639.31	522.186	594.237	807.755	611.898	0.410143	0	0.252307	1	0.314152	2	5	4	1	3	5	-0.967767	-1	1
204549_at	IKBKE	48.209	31.2451	35.6407	95.9649	32.0955	0.262113	0	0.0679174	1	0.0131397	2	5	3	1	4	5	-0.967793	-0.9	1
215991_s_at	KIAA0090	75.7752	23.7368	23.1737	146.725	73.9674	0.425746	0.00455762	0	1	0.411114	2	4	5	1	3	5	-0.96799	-0.9	1
218510_x_at	FAM134B	376.92	1.56237	35.537	549.164	182.614	0.685457	0	0.0620426	1	0.330627	2	5	4	1	3	5	-0.968152	-1	1
211672_s_at	TTLL3;ARPC4	978.978	616.717	373.503	1723.96	880.246	0.448348	0.180098	0	1	0.375238	2	4	5	1	3	5	-0.968518	-0.9	1
221194_s_at	RNFT1	305.914	166.227	195.814	829.264	266.242	0.210678	0	0.0446235	1	0.150844	2	5	4	1	3	5	-0.968642	-1	1
212647_at	RRAS	1212.88	709.522	739.261	2295.35	1268.58	0.31741	0	0.018753	1	0.352534	3	5	4	1	2	5	-0.968855	-0.9	1
217889_s_at	CYBRD1	888.379	19.9121	217.999	1632.76	60.8557	0.538468	0	0.122818	1	0.0253859	2	5	3	1	4	5	-0.968861	-0.9	1
210235_s_at	PPFIA1	604.555	359.514	261.214	990.546	557.851	0.470761	0.134781	0	1	0.406724	2	4	5	1	3	5	-0.969273	-0.9	1
210034_s_at	LOC388907;LOC647436;RPL5	62.2475	32.1862	47.2816	143.947	49.2549	0.268979	0	0.135069	1	0.152725	2	5	4	1	3	5	-0.969737	-1	1
211872_s_at	RGS11	49.0998	8.11937	5.70791	71.8265	27.9711	0.656274	0.0364717	0	1	0.336716	2	4	5	1	3	5	-0.970321	-0.9	1
202999_s_at	LOXL2;ENTPD4	7.18064	1.80921	4.22042	22.7782	4.99784	0.256161	0	0.114989	1	0.152064	2	5	4	1	3	5	-0.970338	-1	1
201635_s_at	FXR1	1880.32	1255.42	600.114	3602.47	1291.04	0.4264	0.218264	0	1	0.230128	2	4	5	1	3	5	-0.970409	-0.9	1
219558_at	ATP13A3	466.433	72.7639	93.8642	997.748	449.481	0.425596	0	0.0228115	1	0.407269	2	5	4	1	3	5	-0.970436	-1	1
203736_s_at	PPFIBP1	333.696	44.0043	76.2102	1374.47	292.282	0.217737	0	0.0242065	1	0.18661	2	5	4	1	3	5	-0.970744	-1	1
208103_s_at	ANP32E	725.225	458.6	432.512	1006.22	671.473	0.510213	0.0454726	0	1	0.41652	2	4	5	1	3	5	-0.970794	-0.9	1
211810_s_at	GALC	167.347	105.086	65.6868	372.171	158.084	0.331698	0.128552	0	1	0.301475	2	4	5	1	3	5	-0.970827	-0.9	1
58308_at	TRIM62	85.9561	58.078	59.5144	189.108	66.8428	0.212761	0	0.0109624	1	0.0668916	2	5	4	1	3	5	-0.97111	-1	1
221190_s_at	C18orf8	450.063	342.065	368.553	502.085	388.726	0.674903	0	0.165529	1	0.291595	2	5	4	1	3	5	-0.971232	-1	1
218304_s_at	OSBPL11	577.771	453.629	500.746	923.615	565.847	0.26414	0	0.100252	1	0.238769	2	5	4	1	3	5	-0.971383	-1	1
202202_s_at	LAMA4	47.5248	6.70402	29.926	106.328	23.1338	0.409749	0	0.233096	1	0.164918	2	5	3	1	4	5	-0.971433	-0.9	1
202660_at	ITPR2	645.005	126.532	123.733	2481.68	206.181	0.22107	0.00118705	0	1	0.034966	2	4	5	1	3	5	-0.971481	-0.9	1
208925_at	CLDND1	1098.14	618.235	464.634	2338.62	1097.67	0.338053	0.0819649	0	1	0.337802	2	4	5	1	3	5	-0.971654	-0.9	1
202742_s_at	PRKACB	571.336	125.799	239.003	968.947	486.412	0.528421	0	0.134263	1	0.427698	2	5	4	1	3	5	-0.972086	-1	1
213716_s_at	SECTM1	234.574	103.704	8.05318	591.815	195.476	0.388036	0.163852	0	1	0.32106	2	4	5	1	3	5	-0.972396	-0.9	1
202316_x_at	UBE4B	651.523	232.067	263.452	2070.2	609.043	0.228197	0	0.0170744	1	0.205086	2	5	4	1	3	5	-0.972455	-1	1
217267_s_at	RAB7A	13.1006	0.735242	2.35644	19.4131	3.7578	0.662033	0	0.0867979	1	0.161826	2	5	4	1	3	5	-0.972778	-1	1
209298_s_at	ITSN1	460.226	129.397	166.443	682.072	162.839	0.598596	0	0.0670304	1	0.0605093	2	5	3	1	4	5	-0.972986	-0.9	1
218959_at	HOXC10	227.692	58.6691	80.5008	363.267	66.5091	0.554905	0	0.0716738	1	0.0257389	2	5	3	1	4	5	-0.973021	-0.9	1
218887_at	MRPL2	259.611	171.663	170.966	306.33	210.541	0.654864	0.00514908	0	1	0.29236	2	4	5	1	3	5	-0.973676	-0.9	1
203357_s_at	CAPN7	705.75	255.911	511.943	1304.31	562.154	0.429072	0	0.244212	1	0.292105	2	5	4	1	3	5	-0.973823	-1	1
217926_at	C19orf53	3882.03	3130.58	2501.41	5422.93	3233.93	0.472569	0.215357	0	1	0.250732	2	4	5	1	3	5	-0.974179	-0.9	1
208027_s_at	TLL2	10.173	4.0342	5.15609	26.4207	4.71018	0.274219	0	0.0501146	1	0.0301959	2	5	3	1	4	5	-0.974677	-0.9	1
209599_s_at	PRUNE	117.021	50.385	58.1458	251.635	118.391	0.331111	0	0.038563	1	0.337918	3	5	4	1	2	5	-0.974863	-0.9	1
217237_at	217237_at	3.7547	1.78317	1.95222	5.06141	3.03069	0.601399	0	0.0515673	1	0.380546	2	5	4	1	3	5	-0.974875	-1	1
206770_s_at	SLC35A3	519.864	276.465	219.048	1072.23	509.445	0.352581	0.0672975	0	1	0.340369	2	4	5	1	3	5	-0.974881	-0.9	1
208525_s_at	OR2F1;OR2F2	5.30719	1.02823	3.15006	14.9965	3.84341	0.306334	0	0.151904	1	0.201541	2	5	4	1	3	5	-0.97535	-1	1
222088_s_at	SLC2A14;SLC2A3	591.992	292.89	307.952	743.231	392.459	0.664168	0	0.0334458	1	0.221097	2	5	4	1	3	5	-0.975597	-1	1
213353_at	ABCA5	350.109	41.9582	135.581	534.519	149.705	0.62561	0	0.190074	1	0.218748	2	5	4	1	3	5	-0.975779	-1	1
217917_s_at	DYNLRB1	4323.33	3529.42	2922.09	6169.65	3891.58	0.431475	0.187011	0	1	0.298529	2	4	5	1	3	5	-0.975915	-0.9	1
210281_s_at	ZMYM2	172.643	118.691	97.9035	237.543	149.717	0.535232	0.148865	0	1	0.371052	2	4	5	1	3	5	-0.975932	-0.9	1
201058_s_at	MYL9	2617	1073.23	108.805	4879.17	1537.74	0.525787	0.20217	0	1	0.299544	2	4	5	1	3	5	-0.976097	-0.9	1
205953_at	LRIG2	198.546	124.945	87.879	380.015	182.7	0.37882	0.126879	0	1	0.324578	2	4	5	1	3	5	-0.976117	-0.9	1
201831_s_at	USO1	1093.75	588.953	738.414	1884.62	1066.06	0.389604	0	0.115354	1	0.368233	2	5	4	1	3	5	-0.976263	-1	1
211098_x_at	TMCO1	1000.97	625.445	657.413	1815.67	1001.11	0.315508	0	0.0268588	1	0.315625	3	5	4	1	2	5	-0.976386	-0.9	1
202766_s_at	FBN1	1615.27	75.2869	291.897	3289.31	83.9108	0.479145	0	0.0673953	1	0.00268321	2	5	3	1	4	5	-0.976474	-0.9	1
202621_at	IRF3	1325.59	636.8	784.209	3184.13	825.968	0.270397	0	0.057868	1	0.0742613	2	5	4	1	3	5	-0.977715	-1	1
208767_s_at	LAPTM4B	4867.79	2236.53	3424.29	7944.69	4258.46	0.460965	0	0.208081	1	0.354217	2	5	4	1	3	5	-0.977763	-1	1
215533_s_at	UBE4B	613.098	209.395	168.601	1872.51	533.978	0.260869	0.0239414	0	1	0.214435	2	4	5	1	3	5	-0.978016	-0.9	1
201179_s_at	GNAI3	896.933	451.936	512.504	2247.82	764.463	0.247787	0	0.033726	1	0.174024	2	5	4	1	3	5	-0.978037	-1	1
209402_s_at	SLC12A4	130.744	80.9582	103.527	230.497	120.563	0.332929	0	0.150923	1	0.264846	2	5	4	1	3	5	-0.978068	-1	1
218036_x_at	NMD3	881.521	712.098	693.43	1436.51	831.973	0.253123	0.0251225	0	1	0.186444	2	4	5	1	3	5	-0.978146	-0.9	1
216110_x_at	216110_x_at	60.7254	6.81336	33.373	168.417	40.5243	0.333607	0	0.164351	1	0.208603	2	5	4	1	3	5	-0.978418	-1	1
203391_at	FKBP2	1240.23	404.48	836.599	2287.09	953.758	0.443932	0	0.229532	1	0.291764	2	5	4	1	3	5	-0.978587	-1	1
221881_s_at	CLIC4	931.785	312.081	59.3723	1612.66	362.946	0.561656	0.162693	0	1	0.195439	2	4	5	1	3	5	-0.979071	-0.9	1
208911_s_at	PDHB	1633.47	939.608	1132.95	2072.96	1169	0.612221	0	0.170593	1	0.202401	2	5	4	1	3	5	-0.979115	-1	1
211755_s_at	ATP5F1	5999.6	4605.68	5074.12	9511.34	5309.53	0.284145	0	0.0954897	1	0.143477	2	5	4	1	3	5	-0.979312	-1	1
214305_s_at	SF3B1	1657.69	799.792	706.74	3153.05	1561.42	0.388728	0.0380377	0	1	0.349375	2	4	5	1	3	5	-0.979405	-0.9	1
211299_s_at	FLOT2	219.33	104.342	63.7883	343.782	108.382	0.555519	0.144838	0	1	0.159267	2	4	5	1	3	5	-0.979435	-0.9	1
211801_x_at	MFN1	597.578	198.479	140.051	1017.1	469.249	0.521666	0.0666189	0	1	0.375347	2	4	5	1	3	5	-0.979624	-0.9	1
213290_at	COL6A2	43.5654	1.80711	6.75767	77.8796	30.8645	0.548928	0	0.0650769	1	0.38197	2	5	4	1	3	5	-0.979998	-1	1
205369_x_at	DBT	184.909	29.713	66.7118	579.633	153.329	0.282216	0	0.0672803	1	0.224789	2	5	4	1	3	5	-0.980175	-1	1
213176_s_at	LTBP4	67.6685	22.4698	23.131	154.161	64.3938	0.343217	0	0.00502084	1	0.318351	2	5	4	1	3	5	-0.980182	-1	1
208495_at	TLX3	34.6607	16.162	3.24324	81.3694	22.2946	0.402138	0.165358	0	1	0.243854	2	4	5	1	3	5	-0.980224	-0.9	1
208957_at	TXNDC4	116.554	36.2503	72.1866	206.076	65.3441	0.47286	0	0.211607	1	0.171316	2	5	3	1	4	5	-0.980435	-0.9	1
216100_s_at	TOR1AIP1	232.881	100.913	114.831	573.467	213.759	0.279265	0	0.0294527	1	0.2388	2	5	4	1	3	5	-0.980451	-1	1
201863_at	FAM32A	1356.34	1112.35	1023.22	2098.03	1270.91	0.309934	0.0829263	0	1	0.23045	2	4	5	1	3	5	-0.98047	-0.9	1
37590_g_at	37590_g_at	125.768	59.784	69.3838	191.338	64.5032	0.501573	0	0.0729723	1	0.0358727	2	5	3	1	4	5	-0.980535	-0.9	1
212009_s_at	STIP1	1710.36	480.911	793.261	2691.61	1317.15	0.556136	0	0.14129	1	0.378269	2	5	4	1	3	5	-0.980881	-1	1
212409_s_at	TOR1AIP1	678.096	313.589	291.354	1216.17	620.633	0.418183	0.0240426	0	1	0.356048	2	4	5	1	3	5	-0.980965	-0.9	1
218923_at	CTBS	435.8	135.547	207.711	1231.73	313.251	0.273908	0	0.0658321	1	0.162112	2	5	4	1	3	5	-0.981105	-1	1
203053_at	BCAS2	1900.07	1539.05	1447.35	2849.96	1546.31	0.32277	0.0653781	0	1	0.0705542	2	4	5	1	3	5	-0.981317	-0.9	1
203501_at	PGCP	105.109	38.6195	18.1787	170.853	45.9903	0.569384	0.133885	0	1	0.182163	2	4	5	1	3	5	-0.981531	-0.9	1
208784_s_at	KLHDC3	275.042	171.45	135.82	576.627	239.123	0.315834	0.080829	0	1	0.23435	2	4	5	1	3	5	-0.981568	-0.9	1
214843_s_at	USP33	511.358	303.085	227.294	924.515	452.227	0.407423	0.108704	0	1	0.322614	2	4	5	1	3	5	-0.982185	-0.9	1
209677_at	PRKCI	176.07	81.3826	48.5923	466.551	116.363	0.305001	0.0784534	0	1	0.162147	2	4	5	1	3	5	-0.982238	-0.9	1
208055_s_at	HERC4	646.668	244.373	345.322	922.609	474.245	0.593149	0	0.148841	1	0.338926	2	5	4	1	3	5	-0.982557	-1	1
212225_at	EIF1	162.714	40.0132	84.9884	296.425	130.888	0.47853	0	0.175402	1	0.35441	2	5	4	1	3	5	-0.982878	-1	1
209621_s_at	PDLIM3	7.67905	4.28488	2.73216	13.0767	4.36027	0.478213	0.1501	0	1	0.157388	2	4	5	1	3	5	-0.983314	-0.9	1
201803_at	POLR2B	2724.11	2155.91	2048.44	4252.55	2558.23	0.30655	0.0487589	0	1	0.231291	2	4	5	1	3	5	-0.983587	-0.9	1
200010_at	RPL11	12059.4	10516.6	10373.4	13703.2	10552.2	0.506337	0.0430056	0	1	0.0536969	2	4	5	1	3	5	-0.983701	-0.9	1
213295_at	CYLD	229.676	143.721	149.975	448.288	208.436	0.28222	0	0.0205341	1	0.212482	2	5	4	1	3	5	-0.983769	-1	1
202498_s_at	SLC2A3	256.653	90.5496	118.849	367.514	180.994	0.599728	0	0.102177	1	0.326556	2	5	4	1	3	5	-0.98392	-1	1
210467_x_at	MAGEA12	1305.79	15.7672	70.8119	3120.25	37.9135	0.415535	0	0.0177307	1	0.00713365	2	5	3	1	4	5	-0.984269	-0.9	1
212688_at	PIK3CB	1094.89	782.356	831.039	1299.98	871.641	0.603786	0	0.0940509	1	0.17249	2	5	4	1	3	5	-0.984307	-1	1
214251_s_at	NUMA1	135.909	74.6146	42.5259	256.459	80.7975	0.436506	0.149994	0	1	0.178895	2	4	5	1	3	5	-0.984605	-0.9	1
219939_s_at	CSDE1	4178.71	1772.3	2679.36	8057.78	2590.01	0.382852	0	0.14431	1	0.130095	2	5	3	1	4	5	-0.984973	-0.9	1
210818_s_at	BACH1	109.321	42.9769	42.0518	167.575	50.2751	0.53591	0.00736995	0	1	0.0655122	2	4	5	1	3	5	-0.985056	-0.9	1
221695_s_at	MAP3K2	347.699	46.6869	95.0692	703.205	283.245	0.458498	0	0.0736953	1	0.360322	2	5	4	1	3	5	-0.985148	-1	1
217385_at	217385_at	6.22378	2.43133	2.29475	8.84323	3.79016	0.599991	0.0208567	0	1	0.22836	2	4	5	1	3	5	-0.986039	-0.9	1
221593_s_at	RPL31	525.162	357.635	357.459	696.648	370.949	0.494423	0.000518885	0	1	0.0397713	2	4	5	1	3	5	-0.986251	-0.9	1
211540_s_at	RB1	93.8444	1.29797	4.14661	189.076	65.3781	0.49285	0	0.0151703	1	0.341255	2	5	4	1	3	5	-0.986435	-1	1
217818_s_at	TTLL3;ARPC4	665.066	413.342	290.124	1127.04	497.984	0.448004	0.147229	0	1	0.248364	2	4	5	1	3	5	-0.986739	-0.9	1
219277_s_at	OGDHL	27.9027	2.07407	7.83815	49.9751	8.3734	0.539208	0	0.120333	1	0.131507	2	5	4	1	3	5	-0.986868	-1	1
210555_s_at	NFATC3	567.501	277.984	330.985	844.64	331.373	0.510922	0	0.0935329	1	0.0942177	2	5	4	1	3	5	-0.987175	-1	1
203808_at	203808_at	4.45921	1.22411	1.4615	11.7921	2.10851	0.306123	0	0.0224631	1	0.0836867	2	5	4	1	3	5	-0.987396	-1	1
218379_at	RBM7	1692.19	1055.2	805.288	3189.82	1212.65	0.37194	0.104805	0	1	0.170835	2	4	5	1	3	5	-0.987553	-0.9	1
208374_s_at	CAPZA1	3582.02	2802.36	3080.7	4907.81	3329.28	0.370306	0	0.1322	1	0.250265	2	5	4	1	3	5	-0.98794	-1	1
217250_s_at	CHD5	27.1318	3.42289	1.88225	85.472	12.3183	0.302065	0.018431	0	1	0.124848	2	4	5	1	3	5	-0.988464	-0.9	1
213221_s_at	SNF1LK2	130.338	89.0927	84.8511	225.053	116.211	0.324439	0.0302535	0	1	0.223677	2	4	5	1	3	5	-0.988648	-0.9	1
219447_s_at	SLC35C2	539.017	222.264	157.939	894.335	260.04	0.517491	0.0873511	0	1	0.13865	2	4	5	1	3	5	-0.988709	-0.9	1
208803_s_at	SRP72	684.813	471.394	392.607	1139.62	556.805	0.391166	0.105469	0	1	0.219806	2	4	5	1	3	5	-0.989569	-0.9	1
209158_s_at	CYTH2	614.957	403.776	410.566	872.696	425.915	0.450356	0	0.0144801	1	0.0472127	2	5	4	1	3	5	-0.989673	-1	1
212497_at	MAPK1IP1L	104.983	66.2471	78.5773	151.09	92.8485	0.45656	0	0.14533	1	0.313537	2	5	4	1	3	5	-0.989701	-1	1
211631_x_at	B4GALT1	119.699	51.7286	45.2605	271.285	92.0591	0.329338	0.0286168	0	1	0.207051	2	4	5	1	3	5	-0.990524	-0.9	1
200646_s_at	NUCB1	568.266	317.559	255.134	866.777	371.606	0.511952	0.102061	0	1	0.190425	2	4	5	1	3	5	-0.991172	-0.9	1
216831_s_at	RUNX1T1	6.25923	0.803274	2.49913	11.3321	3.71984	0.518192	0	0.161068	1	0.277008	2	5	4	1	3	5	-0.991292	-1	1
210516_at	FAM120A	19.7692	4.46473	5.19387	31.4415	10.2187	0.56732	0	0.0270284	1	0.213294	2	5	4	1	3	5	-0.991798	-1	1
202195_s_at	TMED5	917.005	281.664	240.184	2077.39	711.573	0.368397	0.0225778	0	1	0.256579	2	4	5	1	3	5	-0.991807	-0.9	1
217399_s_at	FOXO3	25.6533	1.88002	1.83247	72.6675	8.03316	0.336286	0.000671278	0	1	0.0875371	2	4	5	1	3	5	-0.992091	-0.9	1
211505_s_at	STAU1	1744.2	1239.48	1131.36	2741.75	1366.8	0.380554	0.067139	0	1	0.146201	2	4	5	1	3	5	-0.992481	-0.9	1
221561_at	SOAT1	583.052	401.775	404.47	939.42	516.131	0.337169	0	0.0050126	1	0.212698	2	5	4	1	3	5	-0.992736	-1	1
221471_at	SERINC3	3413.22	1700.62	1694.29	5112.36	2665.3	0.502895	0.00185192	0	1	0.284081	2	4	5	1	3	5	-0.992764	-0.9	1
203165_s_at	SLC33A1	276.049	173.853	198.247	457.306	231.326	0.360539	0	0.0860601	1	0.20276	2	5	4	1	3	5	-0.992925	-1	1
206943_at	TGFBR1	164.216	30.9429	51.1068	268.894	86.5662	0.560086	0	0.0847397	1	0.233759	2	5	4	1	3	5	-0.993049	-1	1
214157_at	GNAS	252.905	26.3599	76.1508	604.881	99.7862	0.391593	0	0.0860658	1	0.126921	2	5	4	1	3	5	-0.993197	-1	1
56256_at	SIDT2	726.628	271.826	169.42	1418.78	356.002	0.445995	0.0819668	0	1	0.149342	2	4	5	1	3	5	-0.993217	-0.9	1
204784_s_at	MLF1	1174.69	506.234	477.039	2266.68	649.157	0.389827	0.0163133	0	1	0.0961746	2	4	5	1	3	5	-0.994695	-0.9	1
201559_s_at	CLIC4	1598.21	282.632	240.034	3220.49	559.126	0.455694	0.0142924	0	1	0.107061	2	4	5	1	3	5	-0.995624	-0.9	1
203615_x_at	SULT1A1	795.839	301.156	283.576	1459.63	416.335	0.435578	0.0149483	0	1	0.112885	2	4	5	1	3	5	-0.996556	-0.9	1
209566_at	INSIG2	629.31	358.996	335.324	1082.72	480.835	0.393347	0.0316726	0	1	0.194691	2	4	5	1	3	5	-0.997139	-0.9	1
213749_at	MASP1	21.9068	4.22889	4.98052	50.8357	13.4898	0.379299	0	0.016127	1	0.198703	2	5	4	1	3	5	-0.997572	-1	1
204032_at	BCAR3	997.86	533.058	481.719	1611.49	702.69	0.456855	0.045442	0	1	0.195589	2	4	5	1	3	5	-0.997898	-0.9	1
210458_s_at	TANK	319.221	111.062	137.908	527.673	209.032	0.499648	0	0.064439	1	0.235159	2	5	4	1	3	5	-0.998051	-1	1
202098_s_at	PRMT2	485.865	278.643	286.75	740.74	348.074	0.448438	0	0.0175439	1	0.150252	2	5	4	1	3	5	-0.999123	-1	1
212972_x_at	APBB2	33.16	54.3613	46.533	7.72323	41.2726	0.545408	1	0.832148	0	0.719356	4	1	2	5	3	0	0.990002	1	0
221406_s_at	C6orf26;MSH5	37.6331	54.5261	55.0771	1.15964	51.9249	0.676468	0.989781	1	0	0.941537	4	2	1	5	3	0	0.987559	0.9	0
219077_s_at	WWOX	204.095	433.444	390.101	49.2109	355.327	0.403099	1	0.887196	0	0.796694	4	1	2	5	3	0	0.986429	1	0
219419_at	C18orf22	215.253	293.08	328.84	97.8807	285.042	0.508195	0.845168	1	0	0.810365	4	2	1	5	3	0	0.984639	0.9	0
212001_at	SFRS14	215.907	261.317	265.165	160.742	228.243	0.528284	0.96315	1	0	0.646419	4	2	1	5	3	0	0.984011	0.9	0
217027_x_at	KPNB1	94.9404	163.266	161.345	37.3652	119.744	0.457306	1	0.984742	0	0.654315	4	1	2	5	3	1	0.983527	1	0
205790_at	SKAP1	18.6505	29.7443	24.2497	2.87421	22.4318	0.587132	1	0.795512	0	0.727857	4	1	2	5	3	4	0.981302	1	0
215879_at	ITGB1	9.29209	17.3774	15.6853	3.20886	15.7588	0.429348	1	0.880573	0	0.885761	4	1	3	5	2	4	0.981017	0.9	0
211280_s_at	NRF1	35.0194	60.2284	58.0617	5.51648	39.4484	0.539241	1	0.960398	0	0.620192	4	1	2	5	3	0	0.980167	1	0
219264_s_at	PPP2R3B;LOC100134089	57.7503	105.593	98.4205	10.3933	67.7374	0.497449	1	0.924658	0	0.602356	4	1	2	5	3	2	0.978555	1	0
219027_s_at	MYO9A	240.753	265.518	283.717	168.766	252.246	0.626241	0.84168	1	0	0.726222	4	2	1	5	3	1	0.976295	0.9	0
220758_s_at	ROBO4	24.6116	36.5861	35.0014	13.7516	36.0716	0.475596	1	0.930601	0	0.977468	4	1	3	5	2	0	0.976257	0.9	0
209235_at	CLCN7	49.2552	87.638	74.4251	9.11752	55.3587	0.511175	1	0.831727	0	0.588906	4	1	2	5	3	1	0.973555	1	0
219990_at	E2F8	216.039	375.421	297.238	59.1576	262.223	0.496047	1	0.752792	0	0.642077	4	1	2	5	3	0	0.973181	1	0
220804_s_at	TP73	11.1448	14.6973	18.1561	1.73495	13.9766	0.573032	0.789369	1	0	0.745481	4	2	1	5	3	4	0.972421	0.9	0
212681_at	EPB41L3	4.9472	9.04187	10.4081	1.25325	9.08834	0.403497	0.850764	1	0	0.85584	4	3	1	5	2	0	0.971743	0.7	0
215114_at	SENP3	79.9164	123.826	120.388	51.7554	119.726	0.390742	1	0.952297	0	0.943111	4	1	2	5	3	1	0.971704	1	0
208856_x_at	RPLP0	16025.4	17099.9	17804.2	13836.2	17404.6	0.551714	0.822505	1	0	0.899294	4	3	1	5	2	5	0.970471	0.7	0
221868_at	PAIP2B	38.1151	59.4787	62.7304	12.3934	63.7505	0.50084	0.916822	0.980137	0	1	4	3	2	5	1	5	0.968751	0.6	0
201985_at	KIAA0196	675.378	704.908	721.178	556.646	709.817	0.721635	0.901113	1	0	0.93095	4	3	1	5	2	5	0.968247	0.7	0
204962_s_at	CENPA	868.31	1546.04	1671.92	123.226	1671.59	0.481105	0.918719	1	0	0.999787	4	3	1	5	2	5	0.967841	0.7	0
203218_at	MAPK9	836.911	981.082	1065.18	542.117	1033.35	0.563592	0.83922	1	0	0.939147	4	3	1	5	2	5	0.967793	0.7	0
212141_at	MCM4	1078.5	1298.4	1437.28	155.022	1338.72	0.720197	0.891691	1	0	0.923136	4	3	1	5	2	5	0.967241	0.7	0
205046_at	CENPE	399.101	668.575	602.426	91.5	676.211	0.526074	0.986941	0.873809	0	1	4	2	3	5	1	5	0.967206	0.7	0
212316_at	NUP210	157.892	385.871	353.553	63.9444	300.505	0.291829	1	0.899611	0	0.734828	4	1	2	5	3	0	0.966655	1	0
219556_at	C16orf59	63.7059	103.917	82.8364	7.25038	66.2535	0.584023	1	0.781925	0	0.610377	4	1	2	5	3	0	0.964652	1	0
210106_at	RDH5	42.9841	77.9296	99.9233	6.03269	71.8166	0.393558	0.765752	1	0	0.700644	4	2	1	5	3	2	0.963968	0.9	0
214942_at	RBM34	37.0386	46.1792	46.4528	10.4957	49.2204	0.685426	0.921466	0.928531	0	1	4	3	2	5	1	3	0.96117	0.6	0
217608_at	SFRS12IP1	49.0535	70.6034	68.9586	28.5021	51.0944	0.488142	1	0.960932	0	0.536618	4	1	2	5	3	0	0.959598	1	0
213699_s_at	YWHAQ	8231.26	9705.8	10619.5	6704.96	9877.46	0.389905	0.766588	1	0	0.81044	4	3	1	5	2	5	0.958127	0.7	0
205235_s_at	KIF20B	275.974	328.803	370.791	72.2162	266.733	0.682435	0.859372	1	0	0.651484	3	2	1	5	4	5	0.957618	0.8	0
204822_at	TTK	347.621	608.672	578.773	136.74	633.619	0.424411	0.949793	0.889619	0	1	4	2	3	5	1	0	0.957306	0.7	0
213336_at	BAZ1B	92.8949	111.281	134.549	26.9331	123.174	0.612937	0.783787	1	0	0.8943	4	3	1	5	2	1	0.956891	0.7	0
206942_s_at	PMCH	25.3657	56.1672	65.2515	1.43366	61.1453	0.375005	0.857653	1	0	0.935657	4	3	1	5	2	5	0.955622	0.7	0
210053_at	TAF5	138.053	291.864	244.13	66.8807	255.47	0.316345	1	0.787833	0	0.838237	4	1	3	5	2	3	0.955375	0.9	0
210879_s_at	RAB11FIP5	209.486	246.49	242.121	115.836	259.579	0.65151	0.908942	0.878547	0	1	4	2	3	5	1	5	0.955302	0.7	0
222269_at	APOOL	156.999	186.777	191.843	59.3324	202.727	0.681104	0.888768	0.924098	0	1	4	3	2	5	1	5	0.954521	0.6	0
201033_x_at	RPLP0	15321.8	16477.3	17706.1	13422.2	16723.4	0.443428	0.713159	1	0	0.770606	4	3	1	5	2	5	0.952251	0.7	0
211289_x_at	CDC2L1;CDC2L2	234.901	273.988	262.019	219.393	262.92	0.284055	1	0.780767	0	0.797271	4	1	3	5	2	1	0.951875	0.9	0
204123_at	LIG3	142.771	195.835	233.922	80.9587	209.77	0.404099	0.751006	1	0	0.842106	4	3	1	5	2	5	0.951838	0.7	0
221895_at	MOSPD2	240.963	310.411	321.421	212.177	305.943	0.263502	0.899216	1	0	0.858317	4	2	1	5	3	0	0.948375	0.9	0
219565_at	CYP20A1	206.684	239.046	244.446	135.803	258.609	0.577179	0.8407	0.884672	0	1	4	3	2	5	1	0	0.947983	0.6	0
218662_s_at	NCAPG	463.447	734.429	906.115	155.32	833.244	0.410401	0.771328	1	0	0.902942	4	3	1	5	2	2	0.947903	0.7	0
217008_s_at	GRM7	16.5549	20.7611	18.3487	11.8027	20.3161	0.530474	1	0.730711	0	0.950326	4	1	3	5	2	0	0.943889	0.9	0
209438_at	PHKA2	57.0448	100.262	82.0396	39.5565	83.4906	0.288084	1	0.699823	0	0.723725	4	1	3	5	2	0	0.943367	0.9	0
222178_s_at	222178_s_at	1.14496	1.65752	1.36224	0.778288	1.49874	0.417037	1	0.664161	0	0.819411	4	1	3	5	2	4	0.942664	0.9	0
212260_at	GIGYF2	230.856	285.807	282.03	168.347	226.052	0.532173	1	0.967844	0	0.491274	3	1	2	5	4	0	0.942474	0.9	0
2028_s_at	E2F1	150.094	183.54	208.524	26.4148	132.743	0.679149	0.862808	1	0	0.583871	3	2	1	5	4	5	0.942315	0.8	0
215408_at	215408_at	33.4364	38.6315	39.6831	3.90379	29.1734	0.82541	0.970609	1	0	0.706263	3	2	1	5	4	0	0.941706	0.8	0
220054_at	IL23A	33.0428	40.5613	39.4985	24.0075	43.0334	0.474895	0.870067	0.814206	0	1	4	2	3	5	1	0	0.941415	0.7	0
209892_at	FUT4	62.9686	66.9664	69.2258	24.446	60.5148	0.860267	0.949544	1	0	0.80547	3	2	1	5	4	0	0.941279	0.8	0
204237_at	GULP1	667.12	1499.91	1777.74	58.0573	1737.51	0.354172	0.838441	1	0	0.976606	4	3	1	5	2	5	0.939657	0.7	0
61297_at	CASKIN2	44.6145	67.616	87.5396	21.7677	69.9665	0.347364	0.69708	1	0	0.732818	4	3	1	5	2	5	0.939613	0.7	0
214591_at	KLHL4	14.6848	53.0322	57.5549	1.71954	50.8751	0.232205	0.918999	1	0	0.880366	4	2	1	5	3	1	0.939311	0.9	0
219673_at	MCM9	105.302	235.747	218.184	73.3811	201.554	0.196599	1	0.891831	0	0.789408	4	1	2	5	3	0	0.939249	1	0
209642_at	BUB1	414.395	791.831	881.904	151.889	896.961	0.352323	0.8589	0.979791	0	1	4	3	2	5	1	5	0.938221	0.6	0
202240_at	PLK1	655.152	771.586	816.079	139.712	556.962	0.762071	0.934218	1	0	0.616899	3	2	1	5	4	5	0.936839	0.8	0
219306_at	KIF15	178.206	407.91	269.485	40.5546	284.618	0.374709	1	0.623185	0	0.66438	4	1	3	5	2	0	0.936779	0.9	0
218663_at	NCAPG	290.515	446.444	605.392	100.23	498.358	0.376681	0.685352	1	0	0.788119	4	3	1	5	2	5	0.935235	0.7	0
213777_s_at	213777_s_at	30.2665	38.8167	36.4524	13.5468	26.5796	0.661645	1	0.906438	0	0.515744	3	1	2	5	4	1	0.933141	0.9	0
218794_s_at	TXNL4B	223.473	319.539	246.261	106.016	229.212	0.550091	1	0.656814	0	0.576968	4	1	2	5	3	0	0.932358	1	0
220952_s_at	PLEKHA5	324.146	469.73	474.891	40.7467	261.43	0.652777	0.988112	1	0	0.508318	3	2	1	5	4	2	0.93109	0.8	0
218497_s_at	RNASEH1	1141.32	1747.7	1830.92	806.273	1887.48	0.309882	0.870719	0.947688	0	1	4	3	2	5	1	5	0.930905	0.6	0
214168_s_at	TJP1	449.626	596.143	594.099	363.681	627.409	0.325885	0.881446	0.873696	0	1	4	2	3	5	1	5	0.930819	0.7	0
209547_s_at	SF4	110.128	152.191	113.34	22.9664	107.466	0.674497	1	0.699353	0	0.653897	3	1	2	5	4	4	0.930479	0.9	0
212312_at	BCL2L1	435.534	948.186	985.27	223.351	1011.11	0.26935	0.920123	0.967198	0	1	4	3	2	5	1	5	0.929167	0.6	0
203280_at	SAFB2	56.4282	63.3854	68.2441	39.4807	53.6535	0.589204	0.83108	1	0	0.492737	3	2	1	5	4	5	0.927964	0.8	0
217331_at	217331_at	27.2361	28.0931	32.4537	4.51551	31.4943	0.813245	0.84392	1	0	0.96566	4	3	1	5	2	5	0.92745	0.7	0
208347_at	208347_at	26.7552	27.6627	32.2732	5.88159	31.6576	0.790918	0.825304	1	0	0.976674	4	3	1	5	2	5	0.925835	0.7	0
213270_at	MPP2	64.2097	77.817	79.7178	29.1402	55.3819	0.69338	0.962418	1	0	0.51884	3	2	1	5	4	5	0.925687	0.8	0
211851_x_at	BRCA1	145.23	197.408	259.242	77.4363	182.045	0.372891	0.65989	1	0	0.575387	4	2	1	5	3	3	0.925057	0.9	0
215713_at	215713_at	2.43354	6.87767	5.80738	0.981935	6.58689	0.246213	1	0.818464	0	0.95068	4	1	3	5	2	0	0.924028	0.9	0
218542_at	CEP55	568.756	980.293	1405.33	122.048	1153.9	0.348098	0.668789	1	0	0.804073	4	3	1	5	2	5	0.923489	0.7	0
210552_s_at	RALGPS1	29.9836	36.0853	56.0034	1.14216	38.3259	0.525716	0.636937	1	0	0.677778	4	3	1	5	2	5	0.92345	0.7	0
208473_s_at	GP2	5.31237	5.8489	5.7017	1.13142	6.36639	0.798658	0.901147	0.873029	0	1	4	2	3	5	1	1	0.923341	0.7	0
213088_s_at	DNAJC9	2348.15	3118.55	3272.87	1393.38	2217.16	0.507994	0.917893	1	0	0.4383	3	2	1	5	4	5	0.923037	0.8	0
203270_at	DTYMK;LOC727761	649.202	813.679	851.205	199.776	532.074	0.689908	0.942394	1	0	0.510106	3	2	1	5	4	5	0.922345	0.8	0
210977_s_at	HSF4	24.4787	43.5229	59.7926	3.46181	31.372	0.373098	0.711176	1	0	0.49547	4	2	1	5	3	3	0.922311	0.9	0
213595_s_at	CDC42BPA	112.775	128.496	128.095	76.447	141.749	0.556308	0.797051	0.79091	0	1	4	2	3	5	1	2	0.921709	0.7	0
218781_at	SMC6	1004.66	1485.62	1691.53	821.642	1503.07	0.210393	0.763291	1	0	0.783351	4	3	1	5	2	5	0.921486	0.7	0
200061_s_at	RPS24	16563	16661.6	17482.5	14374.7	16417.5	0.704132	0.735858	1	0	0.657314	3	2	1	5	4	5	0.920963	0.8	0
220258_s_at	WDR79	135.663	253.497	191.415	79.0463	167.617	0.324543	1	0.644129	0	0.507712	4	1	2	5	3	0	0.920861	1	0
220035_at	NUP210	79.8038	122.768	159.13	32.3877	149.842	0.374114	0.713103	1	0	0.926717	4	3	1	5	2	5	0.92015	0.7	0
208373_s_at	P2RY6	118.752	224.787	135.117	7.78594	145.69	0.511362	1	0.586776	0	0.635499	4	1	3	5	2	0	0.919304	0.9	0
214021_x_at	ITGB5	86.7487	89.6001	106.106	59.2467	95.73	0.586906	0.647756	1	0	0.778571	4	3	1	5	2	0	0.919291	0.7	0
213096_at	TMCC2	32.8665	84.7353	66.5585	17.1667	75.8966	0.232353	1	0.730987	0	0.869189	4	1	3	5	2	0	0.919174	0.9	0
212275_s_at	SRCAP	74.4817	86.9361	78.6829	27.4514	93.4195	0.712925	0.901719	0.77661	0	1	4	2	3	5	1	0	0.918534	0.7	0
202870_s_at	CDC20	1079.46	1922.99	1686.23	272.136	2188.76	0.421222	0.861334	0.737805	0	1	4	2	3	5	1	5	0.918324	0.7	0
201557_at	VAMP2	64.0167	78.1426	62.2398	22.7676	61.6757	0.744905	1	0.712816	0	0.702629	2	1	3	5	4	5	0.918146	0.7	0
202640_s_at	RANBP3	123.283	216.934	225.343	96.9375	223.371	0.205174	0.934512	1	0	0.984642	4	3	1	5	2	5	0.917783	0.7	0
210789_x_at	CEACAM3	3.67946	8.42605	7.16575	2.88401	6.85063	0.14353	1	0.772593	0	0.715733	4	1	2	5	3	1	0.916829	1	0
220690_s_at	DHRS7B	183.435	373.556	455.253	123.558	333.719	0.180518	0.753698	1	0	0.633597	4	2	1	5	3	0	0.915053	0.9	0
221044_s_at	TRIM6-TRIM34;TRIM6;TRIM34	206.835	253.065	202.583	72.0999	191.428	0.744536	1	0.72104	0	0.659398	2	1	3	5	4	0	0.914917	0.7	0
217216_x_at	MLH3	96.9593	158.185	151.95	79.1446	160.941	0.217793	0.966307	0.890081	0	1	4	2	3	5	1	4	0.914678	0.7	0
212880_at	WDR7	167.507	278.465	363.272	79.7708	330.114	0.309474	0.700858	1	0	0.883041	4	3	1	5	2	3	0.914308	0.7	0
205667_at	WRN	148.169	233.756	333.271	61.9786	257.707	0.317703	0.633182	1	0	0.721467	4	3	1	5	2	0	0.914251	0.7	0
219063_at	C1orf35	158.758	175.556	157.463	106.557	173.278	0.756547	1	0.737779	0	0.966985	3	1	4	5	2	5	0.913438	0.7	0
206731_at	CNKSR2	15.409	18.374	26.0433	6.77739	19.2847	0.448025	0.601924	1	0	0.649194	4	3	1	5	2	0	0.911908	0.7	0
201273_s_at	SRP9;hCG_1781062	5059.48	5416.69	5898.94	4225.3	5012.22	0.498423	0.711856	1	0	0.470185	3	2	1	5	4	5	0.911091	0.8	0
212028_at	RBM25	607.844	841.456	719.921	427.527	853.048	0.423756	0.972758	0.687144	0	1	4	2	3	5	1	5	0.910958	0.7	0
215859_at	NCLN	18.3867	27.1333	21.9856	7.48792	16.171	0.554776	1	0.737969	0	0.441991	3	1	2	5	4	2	0.910377	0.9	0
209464_at	AURKB	333.332	966.133	624.419	118.016	663.602	0.253875	1	0.597091	0	0.643291	4	1	3	5	2	5	0.909993	0.9	0
200837_at	BCAP31	2024.5	2951.68	2907.34	1679.66	3112.56	0.240659	0.887724	0.85678	0	1	4	2	3	5	1	5	0.909865	0.7	0
214825_at	FAM155A	26.2381	26.0272	31.6873	10.786	24.8981	0.739289	0.729199	1	0	0.675178	2	3	1	5	4	1	0.909461	0.5	0
205398_s_at	SMAD3	332.191	667.687	742.865	125.613	378.175	0.334674	0.878205	1	0	0.409172	4	2	1	5	3	5	0.909328	0.9	0
206587_at	CCT6B	129.353	160.288	177.451	77.3839	192.881	0.44996	0.717802	0.866404	0	1	4	3	2	5	1	5	0.908979	0.6	0
221703_at	BRIP1	101.67	112.102	96.832	36.3164	105.807	0.862349	1	0.798511	0	0.916937	3	1	4	5	2	0	0.908611	0.7	0
208513_at	FOXB1	7.76376	19.8709	17.3215	1.76884	8.85033	0.331173	1	0.859165	0	0.391198	4	1	2	5	3	2	0.907936	1	0
207988_s_at	ARPC2	2512.76	3298.05	3048.19	2225.33	3299.91	0.267481	0.998269	0.76575	0	1	4	2	3	5	1	5	0.907668	0.7	0
204641_at	NEK2	329.754	725.56	665.735	97.6385	340.3	0.369657	1	0.904725	0	0.386452	4	1	2	5	3	5	0.907346	1	0
204817_at	ESPL1	205.658	759.824	911.336	101.402	715.956	0.128722	0.812933	1	0	0.75877	4	2	1	5	3	5	0.907195	0.9	0
202849_x_at	GRK6	79.7705	108.145	79.7541	27.0411	102.088	0.650146	1	0.649944	0	0.925318	3	1	4	5	2	5	0.906699	0.7	0
219640_at	CLDN15	148.965	171.086	201.521	122.553	182.561	0.334465	0.614591	1	0	0.759903	4	3	1	5	2	5	0.906189	0.7	0
201220_x_at	CTBP2	2852.2	4845.03	4247.33	1725.35	2917.07	0.361207	1	0.80841	0	0.382001	4	1	2	5	3	5	0.905957	1	0
204235_s_at	GULP1	556.247	1690.56	1705.16	47.3958	2011.24	0.25911	0.836708	0.844142	0	1	4	3	2	5	1	5	0.905789	0.6	0
204874_x_at	BAIAP3	6.4411	31.3896	35.9853	2.96891	24.9927	0.105166	0.860805	1	0	0.667056	4	2	1	5	3	5	0.905748	0.9	0
204332_s_at	AGA	849.674	1309.91	895.428	363.752	944.838	0.513574	1	0.561932	0	0.614153	4	1	3	5	2	5	0.905666	0.9	0
204826_at	CCNF	131.882	266.816	205.858	25.2934	120.219	0.441319	1	0.74761	0	0.39303	3	1	2	5	4	5	0.905629	0.9	0
221817_at	DOLPP1	220.08	338.645	341.385	88.2711	189.789	0.520749	0.989175	1	0	0.401076	3	2	1	5	4	0	0.905345	0.8	0
219374_s_at	ALG9	237.487	343.019	278.415	142.683	347.245	0.463449	0.979341	0.663525	0	1	4	2	3	5	1	0	0.90513	0.7	0
219709_x_at	FAM173A	183.911	364.778	339.403	126.206	384.279	0.2236	0.924436	0.826111	0	1	4	2	3	5	1	0	0.904996	0.7	0
201970_s_at	NASP	1889.27	2193.64	1812.66	822.872	2116.4	0.777957	1	0.722068	0	0.943652	3	1	4	5	2	5	0.90496	0.7	0
218069_at	XTP3TPA	1050.36	2075.82	2635.65	538.325	2439.07	0.244137	0.733074	1	0	0.906271	4	3	1	5	2	5	0.904904	0.7	0
AFFX-r2-P1-cre-5_at	AFFX-r2-P1-cre-5_at	14601.1	15057.2	15956.1	13746.2	15393.2	0.38685	0.59324	1	0	0.745283	4	3	1	5	2	5	0.904052	0.7	0
219816_s_at	RBM23	486.823	1058.52	844.04	353.843	945.91	0.188711	1	0.695634	0	0.840196	4	1	3	5	2	5	0.904015	0.9	0
209095_at	DLD	3212.68	3720.31	3873.99	3105.39	3543.05	0.139591	0.800052	1	0	0.569425	4	2	1	5	3	5	0.90395	0.9	0
204097_s_at	RBMX2	275.886	269.075	293.234	149.528	262.812	0.879281	0.831886	1	0	0.788304	2	3	1	5	4	3	0.903462	0.5	0
207282_s_at	MYOG	3.76907	10.3216	7.64277	2.08995	8.9831	0.203983	1	0.674569	0	0.837396	4	1	3	5	2	5	0.903256	0.9	0
202617_s_at	MECP2	79.9708	240.997	182.026	51.4897	159.842	0.15029	1	0.688819	0	0.571758	4	1	2	5	3	5	0.903166	1	0
205665_at	TSPAN9	44.916	43.6012	53.1095	12.4856	40.5387	0.798308	0.765943	1	0	0.690557	2	3	1	5	4	5	0.90269	0.5	0
214919_s_at	EIF4EBP3;ANKHD1-EIF4EBP3	214.024	324.002	239.476	100.704	207.742	0.507483	1	0.621465	0	0.47935	3	1	2	5	4	0	0.902351	0.9	0
206819_at	DKFZP434P211	22.8074	32.9291	32.7761	3.8565	42.4227	0.491386	0.753836	0.749869	0	1	4	2	3	5	1	5	0.902307	0.7	0
222006_at	LETM1	141.801	203.786	154.322	88.5382	149.453	0.462159	1	0.570803	0	0.528555	4	1	2	5	3	5	0.902214	1	0
212022_s_at	MKI67	945.79	2419.9	1550.41	124.785	1154.55	0.357718	1	0.621156	0	0.448677	4	1	2	5	3	5	0.902204	1	0
221206_at	PMS2CL;PMS2	329.744	490.409	449.103	220.973	320.149	0.403699	1	0.846695	0	0.368087	3	1	2	5	4	1	0.90193	0.9	0
212966_at	HIC2	91.6361	144.407	114.287	49.4513	88.2749	0.444258	1	0.682799	0	0.40886	3	1	2	5	4	1	0.901308	0.9	0
209709_s_at	HMMR	395.851	850.54	1101.11	258.221	802.069	0.163284	0.702725	1	0	0.645219	4	2	1	5	3	5	0.900577	0.9	0
209605_at	TST	874.495	2276.4	2443.61	423.846	1296.63	0.22312	0.917213	1	0	0.432122	4	2	1	5	3	5	0.900401	0.9	0
218060_s_at	C16orf57	126.708	190.459	257.155	55.1945	243.574	0.354096	0.669757	1	0	0.932754	4	3	1	5	2	3	0.90024	0.7	0
205167_s_at	CDC25C	294.622	345.511	265.184	30.362	308.526	0.838524	1	0.745114	0	0.882643	3	1	4	5	2	5	0.90006	0.7	0
214525_x_at	MLH3	82.7509	105.009	108.992	23.2952	134.455	0.534867	0.735102	0.770933	0	1	4	3	2	5	1	1	0.900047	0.6	0
207891_s_at	TREX2;UCHL5IP	115.419	247.024	174.359	74.0774	192.121	0.239043	1	0.579841	0	0.682544	4	1	3	5	2	5	0.900028	0.9	0
215719_x_at	FAS	59.8678	180.159	221.614	34.6356	140.901	0.134947	0.77829	1	0	0.56833	4	2	1	5	3	2	0.900025	0.9	0
203436_at	RPP30	876.995	903.891	1076.14	557.644	844.431	0.615918	0.667791	1	0	0.553113	3	2	1	5	4	5	0.899723	0.8	0
201429_s_at	RPL37A	22532.7	23663.7	27653.3	18225.1	24288.9	0.456885	0.576844	1	0	0.643156	4	3	1	5	2	5	0.899569	0.7	0
204441_s_at	POLA2	179.404	376.516	428.889	150.227	325.212	0.104704	0.812055	1	0	0.627947	4	2	1	5	3	5	0.899485	0.9	0
201887_at	IL13RA1	742.649	1475.83	1225.61	643.475	1199.82	0.119149	1	0.699383	0	0.668399	4	1	2	5	3	5	0.899063	1	0
214507_s_at	EXOSC2	593.8	823.9	995.316	248.06	546.4	0.462679	0.770606	1	0	0.399247	3	2	1	5	4	5	0.89887	0.8	0
205284_at	URB2	111.002	249.328	321.761	56.3526	185.955	0.205907	0.727089	1	0	0.488313	4	2	1	5	3	5	0.898827	0.9	0
212675_s_at	CEP68	358.264	643.276	613.321	339.599	552.548	0.0614633	1	0.901359	0	0.701235	4	1	2	5	3	5	0.898452	1	0
219034_at	PARP16	99.371	179.571	176.802	55.0022	102.229	0.356179	1	0.977771	0	0.379122	4	1	2	5	3	5	0.898334	1	0
206297_at	CTRC	16.4383	23.7371	28.9957	8.46263	30.2128	0.366695	0.702269	0.944042	0	1	4	3	2	5	1	0	0.898248	0.6	0
208382_s_at	DMC1	50.1183	53.9135	51.6783	28.4447	59.1069	0.706851	0.830625	0.757728	0	1	4	2	3	5	1	5	0.898061	0.7	0
221622_s_at	TMEM126B	1369.83	3034.1	3209.55	1234.8	2655.64	0.0683783	0.911153	1	0	0.719504	4	2	1	5	3	5	0.89776	0.9	0
207872_s_at	LILRA1	21.0118	19.4787	23.8932	3.58747	20.6159	0.858099	0.782598	1	0	0.838602	2	4	1	5	3	5	0.897469	0.3	0
208828_at	POLE3	646.107	1005.52	1071.17	457.54	693.292	0.307298	0.893014	1	0	0.384192	4	2	1	5	3	5	0.897444	0.9	0
201928_at	PKP4	694.924	798.639	719.971	600.938	693.891	0.475395	1	0.602086	0	0.47017	3	1	2	5	4	5	0.897421	0.9	0
211481_at	SLCO1A2	12.438	24.5913	31.5316	3.24037	32.7281	0.311914	0.724061	0.959424	0	1	4	3	2	5	1	5	0.896357	0.6	0
210271_at	NEUROD2	17.4861	18.4322	22.5637	5.28499	24.0716	0.649458	0.699818	0.919735	0	1	4	3	2	5	1	0	0.89597	0.6	0
212274_at	LPIN1	1047.07	1970.93	1449.15	761.412	1574.12	0.236175	1	0.568605	0	0.671927	4	1	3	5	2	5	0.895853	0.9	0
209119_x_at	NR2F2	45.9531	75.1895	66.6584	15.9223	89.286	0.409341	0.807855	0.69157	0	1	4	2	3	5	1	2	0.895419	0.7	0
213945_s_at	NUP210	94.7846	98.5106	95.6077	81.7902	101.327	0.665124	0.855841	0.707255	0	1	4	2	3	5	1	1	0.895328	0.7	0
201417_at	SOX4	1444.8	3415.64	3910.27	931.129	2298.46	0.172423	0.833969	1	0	0.458968	4	2	1	5	3	5	0.8953	0.9	0
211578_s_at	RPS6KB1	334.414	356.078	441.461	244.774	379.224	0.455749	0.565894	1	0	0.683573	4	3	1	5	2	5	0.895114	0.7	0
208478_s_at	BAX	375.058	467.925	442.015	318.658	493.533	0.322516	0.853564	0.705401	0	1	4	2	3	5	1	0	0.89492	0.7	0
211993_at	WNK1	154.708	178.516	230.443	109.254	182.777	0.375067	0.571521	1	0	0.60668	4	3	1	5	2	0	0.894899	0.7	0
209366_x_at	CYB5A	483.203	2656.69	2781.43	317.902	1854.33	0.0670993	0.949365	1	0	0.62367	4	2	1	5	3	5	0.894261	0.9	0
217789_at	SNX6	886.854	1318.28	1516.29	786.374	1201.99	0.13766	0.728722	1	0	0.569403	4	2	1	5	3	5	0.893685	0.9	0
211897_s_at	CRHR1	2.62121	3.4118	2.56002	1.47906	2.75557	0.590949	1	0.559289	0	0.660466	3	1	4	5	2	5	0.893682	0.7	0
221138_s_at	221138_s_at	21.7283	51.0002	30.2988	7.11958	37.5501	0.33292	1	0.528234	0	0.693484	4	1	3	5	2	0	0.893624	0.9	0
215179_x_at	PGF	326.565	484.089	389.397	273.081	406.412	0.253469	1	0.55124	0	0.631877	4	1	3	5	2	1	0.893566	0.9	0
218356_at	FTSJ2	1055.64	1538.31	1047.82	472.832	1214.59	0.546992	1	0.539653	0	0.696174	3	1	4	5	2	5	0.893419	0.7	0
212576_at	MGRN1	348.202	708.258	506.873	240.044	571.407	0.231001	1	0.569887	0	0.707717	4	1	3	5	2	5	0.893061	0.9	0
203871_at	SENP3	273.011	332.783	376.82	209.838	387.484	0.355612	0.692079	0.939971	0	1	4	3	2	5	1	5	0.892991	0.6	0
221822_at	CCDC101	231.831	284.179	221.831	125.825	227.718	0.669424	1	0.606275	0	0.643451	2	1	4	5	3	5	0.892894	0.6	0
204780_s_at	FAS	172.608	485.277	592.988	72.0014	301.522	0.193108	0.793256	1	0	0.44055	4	2	1	5	3	5	0.892623	0.9	0
219671_at	HPCAL4	57.9879	71.6026	62.871	42.3644	54.2604	0.534352	1	0.701363	0	0.406865	3	1	2	5	4	0	0.89236	0.9	0
205053_at	PRIM1	428.315	1248.36	1532.84	304.011	1054.41	0.101156	0.768495	1	0	0.610662	4	2	1	5	3	5	0.89199	0.9	0
210290_at	ZNF174	66.8844	116.087	100.41	54.731	114.526	0.19808	1	0.744491	0	0.974558	4	1	3	5	2	3	0.891713	0.9	0
215852_x_at	C20orf117	40.0515	47.3498	46.8916	11.8872	29.7076	0.794197	1	0.987079	0	0.502513	3	1	2	5	4	1	0.891606	0.9	0
211971_s_at	LRPPRC	1974.51	3699.82	4106.85	1609.11	2780.4	0.146292	0.837041	1	0	0.46894	4	2	1	5	3	5	0.891252	0.9	0
219105_x_at	ORC6L	843.808	948.977	952.427	218.982	1180.98	0.649509	0.758832	0.762418	0	1	4	3	2	5	1	5	0.890767	0.6	0
207290_at	PLXNA2	10.6938	22.1938	28.2602	3.50425	13.2447	0.290417	0.754952	1	0	0.393459	4	2	1	5	3	3	0.8906	0.9	0
203856_at	VRK1	461.395	1352.53	1365.53	391.923	953.141	0.0713553	0.986648	1	0	0.576432	4	2	1	5	3	5	0.890085	0.9	0
219435_at	C17orf68	97.4673	216.68	154.126	63.4704	140.327	0.221898	1	0.59171	0	0.501644	4	1	2	5	3	5	0.890073	1	0
218391_at	SNF8	1440.41	1708.89	1992.74	1273.78	1740.68	0.231765	0.605194	1	0	0.64941	4	3	1	5	2	5	0.890063	0.7	0
212330_at	TFDP1	723.422	1028.25	1467.46	403.413	994.726	0.300747	0.587227	1	0	0.555721	4	2	1	5	3	5	0.890025	0.9	0
214659_x_at	YLPM1	383.016	666.686	615.161	327.423	676.659	0.159185	0.971443	0.823907	0	1	4	2	3	5	1	5	0.889925	0.7	0
208487_at	LMX1B	21.2586	20.7127	31.1842	1.62144	19.7436	0.664253	0.645787	1	0	0.613006	2	3	1	5	4	5	0.889801	0.5	0
218815_s_at	TMEM51	157.479	311.908	357.942	130.764	247.843	0.117595	0.797366	1	0	0.515362	4	2	1	5	3	0	0.889585	0.9	0
213671_s_at	MARS	1812.95	2981.13	2724.21	1579.99	2163.97	0.166265	1	0.816635	0	0.416789	4	1	2	5	3	5	0.889358	1	0
217853_at	TNS3	4294.62	4023.85	5452.35	672.328	3828.39	0.757798	0.701152	1	0	0.660261	2	3	1	5	4	5	0.888939	0.5	0
34858_at	KCTD2	127.063	254.698	196.232	82.4925	152.128	0.258822	1	0.660487	0	0.404374	4	1	2	5	3	5	0.888821	1	0
214805_at	EIF4A1	529.662	677.676	607.172	339.713	467.721	0.562041	1	0.791385	0	0.378763	3	1	2	5	4	5	0.888719	0.9	0
213090_s_at	TAF4	489.543	643.433	706.349	459.844	658.15	0.12048	0.744768	1	0	0.80447	4	3	1	5	2	5	0.888569	0.7	0
206364_at	KIF14	258.503	387.082	606.077	64.068	522.537	0.35873	0.595957	1	0	0.84587	4	3	1	5	2	5	0.888438	0.7	0
201090_x_at	TUBA1B	13579.9	17122.6	15092.2	12020.8	14209.9	0.305598	1	0.602023	0	0.429084	4	1	2	5	3	5	0.888115	1	0
221846_s_at	CASKIN2	63.3725	68.3684	69.2748	23.9285	49.7364	0.869839	0.980012	1	0	0.569129	3	2	1	5	4	0	0.887938	0.8	0
205047_s_at	ASNS	1711.92	2957.11	2170.03	120.253	1251.62	0.561067	1	0.722552	0	0.39881	3	1	2	5	4	5	0.887716	0.9	0
219261_at	C7orf26	235.774	442.47	303.879	103.09	249.046	0.39096	1	0.591635	0	0.430067	4	1	2	5	3	5	0.887649	1	0
204386_s_at	MRP63	2252.43	4155.86	3871.25	1902.39	4261.87	0.148355	0.955071	0.834447	0	1	4	2	3	5	1	5	0.887482	0.7	0
201555_at	MCM3	773.635	832.673	1213	279.694	1088.91	0.529238	0.592495	1	0	0.867043	4	3	1	5	2	5	0.88712	0.7	0
205117_at	FGF1	30.9312	66.8347	37.4415	7.46763	44.9535	0.395229	1	0.504891	0	0.631425	4	1	3	5	2	5	0.886847	0.9	0
212429_s_at	GTF3C2	1667.1	2433.21	2486.23	1448.91	1862.46	0.21034	0.948888	1	0	0.398672	4	2	1	5	3	5	0.88682	0.9	0
219112_at	RAPGEF6	243.14	307.735	400.724	159.332	272.051	0.347186	0.61478	1	0	0.466954	4	2	1	5	3	3	0.886746	0.9	0
204651_at	NRF1	140.929	222.046	235.769	114.479	161.879	0.218072	0.886858	1	0	0.390799	4	2	1	5	3	5	0.886723	0.9	0
200959_at	FUS	1031.82	2249.18	1655.84	641.321	2094.34	0.242869	1	0.630975	0	0.903698	4	1	3	5	2	5	0.886654	0.9	0
202345_s_at	FABP5L7;FABP5;FABP5L2	3115.66	2990.5	3499.26	1053.4	3627.49	0.801161	0.752538	0.950184	0	1	3	4	2	5	1	5	0.886496	0.3	0
210052_s_at	TPX2	2336.4	2653.29	2137.07	918.114	2528.9	0.817373	1	0.702497	0	0.928313	3	1	4	5	2	5	0.886111	0.7	0
221519_at	FBXW4	476.426	619.992	466.596	260.628	465.863	0.6005	1	0.573146	0	0.571106	2	1	3	5	4	5	0.88599	0.7	0
221521_s_at	GINS2	453.838	995.967	1618	74.9065	1205.85	0.245566	0.596892	1	0	0.732907	4	3	1	5	2	0	0.885936	0.7	0
212810_s_at	SLC1A4	151.259	198.241	135.31	36.3844	146.704	0.709731	1	0.611193	0	0.681589	2	1	4	5	3	1	0.885804	0.6	0
206088_at	LRRC37A2;LRRC37A	82.166	140.628	186.134	56.481	123.097	0.198106	0.649017	1	0	0.513802	4	2	1	5	3	5	0.885383	0.9	0
206003_at	CEP135	116.493	145.035	177.58	95.8168	139.411	0.252879	0.60196	1	0	0.533176	4	2	1	5	3	5	0.885244	0.9	0
202365_at	UNC119B	702.585	913.529	1127.31	537.923	806.182	0.279378	0.637282	1	0	0.455149	4	2	1	5	3	5	0.884607	0.9	0
219013_at	GALNT11	785.088	1031	794.793	404.42	712.869	0.607533	1	0.623022	0	0.492274	3	1	2	5	4	5	0.884219	0.9	0
210599_at	ZNF614	33.8225	47.8798	45.2407	4.63561	22.191	0.674932	1	0.938972	0	0.40596	3	1	2	5	4	0	0.884185	0.9	0
219479_at	KDELC1	192.775	237.948	192.788	144.659	212.351	0.515774	1	0.515913	0	0.725616	4	1	3	5	2	0	0.884161	0.9	0
212578_x_at	RPS17	11781.3	13399.2	13197.1	11745.9	12931.9	0.0214117	1	0.87776	0	0.717353	4	1	2	5	3	5	0.884145	1	0
217772_s_at	MTCH2	2412.01	3455.83	3687.72	2306.03	3493.08	0.0767032	0.832169	1	0	0.859129	4	3	1	5	2	1	0.884124	0.7	0
205055_at	ITGAE	2013.11	2687.15	3301.67	1699.32	2820.47	0.195831	0.616488	1	0	0.699691	4	3	1	5	2	5	0.883996	0.7	0
202725_at	POLR2A	301.302	469.128	566.8	124.043	280.209	0.400353	0.7794	1	0	0.352713	3	2	1	5	4	5	0.882764	0.8	0
200888_s_at	RPL23	10808.9	11345.5	12498.3	9942.8	11475.3	0.338916	0.548895	1	0	0.599687	4	3	1	5	2	5	0.881818	0.7	0
208795_s_at	MCM7	755.64	2637.39	2112.37	510.467	1465.95	0.115271	1	0.753155	0	0.449233	4	1	2	5	3	5	0.881648	1	0
211487_x_at	RPS17	12753	13948.2	14821.2	12383.5	14013.3	0.151577	0.641876	1	0	0.668581	4	3	1	5	2	5	0.88138	0.7	0
213457_at	MFHAS1	70.9728	446.229	430.706	67.1451	327.479	0.0100972	1	0.959051	0	0.686745	4	1	2	5	3	5	0.881007	1	0
211927_x_at	EEF1G	12346.1	14267	12915.1	11409.8	13679.7	0.327698	1	0.526844	0	0.794449	4	1	3	5	2	0	0.880985	0.9	0
204808_s_at	TMEM5	700.144	2534.12	2808.94	605.556	2454.21	0.0429285	0.875274	1	0	0.839007	4	2	1	5	3	5	0.880741	0.9	0
204106_at	TESK1	190.015	253.229	218.502	102.568	159.197	0.580422	1	0.769502	0	0.37587	3	1	2	5	4	5	0.88066	0.9	0
204768_s_at	FEN1	963.666	1125.97	1661.53	506.656	1268.87	0.395723	0.536261	1	0	0.659998	4	3	1	5	2	5	0.880435	0.7	0
218560_s_at	JMJD4	77.7567	80.5698	80.3872	20.9458	97.0031	0.746949	0.783935	0.781534	0	1	4	2	3	5	1	5	0.88042	0.7	0
221591_s_at	FAM64A	391.641	632.682	599.976	47.4628	844.162	0.432005	0.734555	0.693503	0	1	4	2	3	5	1	5	0.8804	0.7	0
207846_at	POU1F1	11.8483	21.1523	29.6585	7.53301	23.9335	0.195037	0.615547	1	0	0.741249	4	3	1	5	2	0	0.880309	0.7	0
203725_at	GADD45A	721.067	1252.59	806.82	311.078	786.563	0.435458	1	0.526538	0	0.505023	4	1	2	5	3	5	0.880241	1	0
207856_s_at	FLJ41352;SMPD4	463.268	710.981	558.379	381.407	554.503	0.248384	1	0.536972	0	0.525211	4	1	2	5	3	5	0.880231	1	0
203489_at	SIVA1	356.603	734.926	512.23	228.193	467.064	0.253408	1	0.560526	0	0.471394	4	1	2	5	3	5	0.880181	1	0
216802_at	216802_at	2.77674	11.7536	10.4866	0.901317	5.05914	0.172814	1	0.88325	0	0.383129	4	1	2	5	3	5	0.880079	1	0
207551_s_at	MSL3	405.937	769.463	957.456	309.99	619.694	0.148188	0.709648	1	0	0.478332	4	2	1	5	3	5	0.879838	0.9	0
207843_x_at	CYB5A	293.317	2098.08	2175.05	249.832	1433.63	0.0225871	0.96002	1	0	0.61489	4	2	1	5	3	5	0.879311	0.9	0
215227_x_at	ACP1	2594	3178.52	4370.54	1535.03	2912.4	0.373467	0.57961	1	0	0.485757	4	2	1	5	3	5	0.87924	0.9	0
216299_s_at	XRCC3	45.0794	181.753	107.143	7.71764	91.3811	0.214679	1	0.571294	0	0.480727	4	1	2	5	3	5	0.878984	1	0
202903_at	LSM5	176.778	187.644	258.664	65.5216	161.015	0.576033	0.632292	1	0	0.49442	3	2	1	5	4	5	0.878926	0.8	0
201416_at	SOX4	634.479	2887.35	2652.33	172.133	1215.92	0.17028	1	0.913443	0	0.384421	4	1	2	5	3	5	0.878659	1	0
46947_at	GNL3L	88.4879	192.674	166.108	52.2309	99.4574	0.258161	1	0.810842	0	0.336268	4	1	2	5	3	5	0.878622	1	0
212796_s_at	TBC1D2B	166.143	278.428	327.49	109.402	345.719	0.240105	0.715251	0.922862	0	1	4	3	2	5	1	0	0.878131	0.6	0
215251_at	215251_at	17.4506	32.9122	26.6659	6.45143	15.0393	0.415678	1	0.763941	0	0.324551	3	1	2	5	4	0	0.877918	0.9	0
216306_x_at	PTBP1	2990.99	4755.4	5143.89	2921.63	4515.31	0.0312115	0.825182	1	0	0.717144	4	2	1	5	3	5	0.877828	0.9	0
201277_s_at	HNRNPAB	5524.49	5842.18	7663.61	3760.55	6305.44	0.451938	0.533333	1	0	0.652024	4	3	1	5	2	5	0.877688	0.7	0
201479_at	DKC1	1254.76	3896.19	3411.86	1222.97	3083.18	0.011892	1	0.818821	0	0.695869	4	1	2	5	3	5	0.877422	1	0
203324_s_at	CAV2	3905.22	4520.16	3604.49	1655.82	3453.93	0.785312	1	0.680321	0	0.627757	2	1	3	5	4	5	0.877179	0.7	0
200773_x_at	PTMA	7464.29	8036.66	8024.9	6147.84	6909.44	0.69697	1	0.993774	0	0.403215	3	1	2	5	4	5	0.876943	0.9	0
212276_at	LPIN1	577.334	1294.62	1024.56	499.705	908.188	0.097657	1	0.660266	0	0.51387	4	1	2	5	3	1	0.876228	1	0
204026_s_at	ZWINT	2003.8	2807.11	4341.51	545.982	4022.92	0.384088	0.595735	1	0	0.916062	4	3	1	5	2	4	0.876194	0.7	0
210792_x_at	SIVA1	546.417	1220.49	757.414	197.383	649.26	0.341151	1	0.547383	0	0.441671	4	1	2	5	3	4	0.875869	1	0
204262_s_at	PSEN2	74.6956	136.484	131.522	63.2701	146.431	0.13739	0.880389	0.820721	0	1	4	2	3	5	1	4	0.875689	0.7	0
202188_at	NUP93	1424.61	1614.75	1332.02	770.385	1593.41	0.774813	1	0.665157	0	0.974727	3	1	4	5	2	5	0.875587	0.7	0
204602_at	DKK1	266.194	3066.43	2956.65	232.612	2740.9	0.0118504	1	0.961261	0	0.885127	4	1	2	5	3	5	0.875473	1	0
205452_at	PIGB	407.842	473.816	576.382	337.292	529.408	0.295077	0.571015	1	0	0.80353	4	3	1	5	2	3	0.875455	0.7	0
215006_at	215006_at	106.105	149.14	110.908	25.6028	80.6515	0.651643	1	0.690522	0	0.445604	3	1	2	5	4	5	0.875309	0.9	0
204686_at	IRS1	72.9456	600.094	531.703	67.0996	380.405	0.0109682	1	0.871685	0	0.587821	4	1	2	5	3	5	0.875149	1	0
218000_s_at	PHLDA1	85.9322	180.468	218.787	30.9033	94.9589	0.292888	0.796049	1	0	0.340932	4	2	1	5	3	0	0.875138	0.9	0
213832_at	KCND3	8.9933	23.8367	20.3062	5.99646	12.5889	0.167982	1	0.802105	0	0.369526	4	1	2	5	3	3	0.875109	1	0
206052_s_at	SLBP	1719.67	2057.66	1993.99	1025.16	1423.27	0.672649	1	0.938334	0	0.385579	3	1	2	5	4	5	0.875105	0.9	0
204315_s_at	GTSE1	243.883	370.946	243.124	52.5211	367.367	0.600964	1	0.59858	0	0.98876	3	1	4	5	2	5	0.874838	0.7	0
206466_at	ACSBG1	11.3296	36.8478	31.9353	3.17464	14.3434	0.24218	1	0.854112	0	0.331681	4	1	2	5	3	5	0.874803	1	0
211780_x_at	DCTN1	495.086	708.013	566.409	306.907	455.806	0.46915	1	0.646966	0	0.371221	3	1	2	5	4	0	0.874574	0.9	0
204318_s_at	GTSE1	361.466	714.98	396.999	99.9198	519.273	0.425237	1	0.483008	0	0.681808	4	1	3	5	2	5	0.874559	0.9	0
201376_s_at	HNRNPF	876.696	1080.36	1292.84	725.828	973.011	0.266075	0.625264	1	0	0.43594	4	2	1	5	3	5	0.874367	0.9	0
221893_s_at	ADCK2	120.491	326.725	224.238	78.2746	276.038	0.169919	1	0.587495	0	0.795987	4	1	3	5	2	0	0.874086	0.9	0
201518_at	CBX1	1979.03	2313.03	3115.38	1281.23	2186.35	0.380449	0.562549	1	0	0.493482	4	2	1	5	3	5	0.873933	0.9	0
205404_at	HSD11B1	6.5737	6.4455	10.6483	1.31114	8.23256	0.563615	0.549885	1	0	0.741277	3	4	1	5	2	0	0.873576	0.4	0
215385_at	215385_at	226.391	228.598	215.99	157.941	219.276	0.968765	1	0.82156	0	0.868067	2	1	4	5	3	5	0.872772	0.6	0
221515_s_at	LCMT1	800.388	1059.72	983.306	750.182	865.438	0.162197	1	0.753135	0	0.372348	4	1	2	5	3	0	0.872505	1	0
217802_s_at	NUCKS1	3767.04	6137.83	6754.11	3352.5	4787.02	0.121866	0.818827	1	0	0.421718	4	2	1	5	3	5	0.872499	0.9	0
211471_s_at	RAB36	5.11818	94.5722	114.004	2.4112	69.3614	0.0242577	0.825869	1	0	0.599951	4	2	1	5	3	0	0.872464	0.9	0
206081_at	SLC24A1	187.312	276.378	192.223	88.8669	179.066	0.525009	1	0.5512	0	0.481033	3	1	2	5	4	5	0.871877	0.9	0
214041_x_at	RPL37A	218.886	217.491	223.265	178.538	231.862	0.756657	0.730497	0.838778	0	1	3	4	2	5	1	4	0.871867	0.3	0
220719_at	FLJ13769	65.3599	93.2303	67.5519	43.3018	80.3316	0.441794	1	0.485697	0	0.741657	4	1	3	5	2	0	0.871683	0.9	0
44563_at	WDR79	299.854	722.859	868.568	213.162	488.988	0.132272	0.777681	1	0	0.420848	4	2	1	5	3	5	0.871671	0.9	0
204947_at	E2F1	202.428	195.527	258.37	38.3787	158.69	0.745708	0.714339	1	0	0.546891	2	3	1	5	4	1	0.871158	0.5	0
217231_s_at	MAST1	3.58165	7.43607	4.86339	1.91701	4.40191	0.301617	1	0.533855	0	0.45024	4	1	2	5	3	5	0.871144	1	0
202134_s_at	WWTR1	474.559	881.007	628.783	272.444	507.934	0.332118	1	0.585542	0	0.386961	4	1	2	5	3	5	0.871142	1	0
214682_at	LOC399491	64.5216	99.0354	116.497	23.8944	53.8202	0.438726	0.811435	1	0	0.323164	3	2	1	5	4	4	0.871024	0.8	0
220148_at	ALDH8A1	3.83768	30.3812	22.0978	2.19852	24.8603	0.058162	1	0.706082	0	0.804103	4	1	3	5	2	5	0.871009	0.9	0
209567_at	RRS1	603.278	2270.18	1644.77	478.442	1763.44	0.0696731	1	0.650948	0	0.71718	4	1	3	5	2	4	0.870884	0.9	0
203831_at	R3HDM2	577.516	938.538	586.435	220.063	605.561	0.497516	1	0.50993	0	0.53655	4	1	3	5	2	5	0.870739	0.9	0
222207_x_at	222207_x_at	274.107	266.137	278.628	200.169	284.674	0.874954	0.78064	0.928454	0	1	3	4	2	5	1	5	0.870309	0.3	0
221004_s_at	ITM2C	690.237	710.894	666.535	364.839	771.441	0.800286	0.85109	0.741993	0	1	3	2	4	5	1	0	0.870236	0.5	0
203046_s_at	TIMELESS	454.09	1130.59	1588.17	152.524	732.444	0.210056	0.681272	1	0	0.403944	4	2	1	5	3	5	0.870036	0.9	0
222024_s_at	AKAP13	306.772	371.063	510.125	215.004	390.197	0.31095	0.528797	1	0	0.593631	4	3	1	5	2	5	0.869454	0.7	0
217195_at	217195_at	31.3598	35.5775	33.7002	3.30261	20.1688	0.869319	1	0.941834	0	0.522579	3	1	2	5	4	1	0.868736	0.9	0
209487_at	RBPMS	483.268	868.837	1188.2	255.796	626.892	0.243963	0.657484	1	0	0.397999	4	2	1	5	3	5	0.86858	0.9	0
204887_s_at	PLK4	401.782	353.462	493.083	100.24	393.844	0.767589	0.644588	1	0	0.747383	2	4	1	5	3	5	0.868326	0.3	0
214149_s_at	ATP6V0E1	185.906	319.744	273.514	178.381	255.797	0.0532318	1	0.67297	0	0.54764	4	1	2	5	3	1	0.868272	1	0
208956_x_at	DUT	4087.1	4557.57	4105.99	3687.4	4333.28	0.459336	1	0.481044	0	0.742246	4	1	3	5	2	0	0.868136	0.9	0
220290_at	AIM1L	7.36477	37.009	23.6036	2.74037	18.6177	0.134946	1	0.608814	0	0.46332	4	1	2	5	3	0	0.867974	1	0
201492_s_at	RPL41	22327	22155.5	22401.5	15763.5	24028.5	0.794132	0.773382	0.803146	0	1	3	4	2	5	1	5	0.867742	0.3	0
209715_at	CBX5	315.257	668.296	651.222	240.217	757.005	0.145205	0.828345	0.795307	0	1	4	2	3	5	1	4	0.867338	0.7	0
201664_at	SMC4	1866.33	2871.47	3305.78	1382.14	2031.03	0.251705	0.774225	1	0	0.337324	4	2	1	5	3	5	0.867183	0.9	0
218993_at	RNMTL1	280.19	762.852	736.321	196.839	405.938	0.14726	1	0.953127	0	0.369424	4	1	2	5	3	5	0.866684	1	0
219522_at	FJX1	340.208	380.368	395.014	72.1144	514.452	0.606084	0.696874	0.729985	0	1	4	3	2	5	1	1	0.866547	0.6	0
222189_at	222189_at	13.2593	28.4233	15.4668	3.34809	22.7895	0.395259	1	0.483294	0	0.775324	4	1	3	5	2	5	0.866529	0.9	0
211965_at	ZFP36L1	144.092	147.382	176.667	34.1303	104.365	0.771462	0.794544	1	0	0.492748	3	2	1	5	4	5	0.866115	0.8	0
203145_at	SPAG5	478.018	848.361	1285.42	208.388	1141.76	0.250345	0.594201	1	0	0.866615	4	3	1	5	2	3	0.866088	0.7	0
211270_x_at	PTBP1	2855.78	4446.5	4842.73	2845.99	4149.19	0.00490299	0.801562	1	0	0.652664	4	2	1	5	3	1	0.865775	0.9	0
202338_at	TK1	505.979	626.866	990.666	138.94	525.878	0.430936	0.572867	1	0	0.454299	4	2	1	5	3	5	0.865698	0.9	0
214426_x_at	CHAF1A	156.97	464.339	362.681	99.9391	232.051	0.156506	1	0.721026	0	0.362546	4	1	2	5	3	3	0.865521	1	0
214228_x_at	TNFRSF4	2.30718	3.63883	4.01614	1.31931	4.74925	0.288014	0.676257	0.786262	0	1	4	3	2	5	1	5	0.865385	0.6	0
210674_s_at	PCDHA2;PCDHA3;PCDHA1;PCDHA6;PCDHA7;PCDHA4;PCDHA5;PCDHA8;PCDHA9;PCDHAC2;PCDHAC1;PCDHA10;PCDHA11;PCDHA12;PCDHA13	202.111	219.906	216.237	29.4974	288.625	0.666134	0.734806	0.720647	0	1	4	2	3	5	1	5	0.865382	0.7	0
209516_at	SMYD5	213.529	390.726	362.628	103.486	186.325	0.383105	1	0.902179	0	0.288396	3	1	2	5	4	0	0.864739	0.9	0
35671_at	GTF3C1	816.601	924.512	927.465	703.546	772.841	0.504892	0.986812	1	0	0.309465	3	2	1	5	4	4	0.864601	0.8	0
213665_at	SOX4	39.1869	69.9387	39.6317	9.27806	41.2266	0.493052	1	0.500384	0	0.526677	4	1	3	5	2	5	0.864544	0.9	0
207479_at	207479_at	5.95667	14.3897	15.9658	3.90049	17.6838	0.149179	0.761008	0.875356	0	1	4	3	2	5	1	0	0.864342	0.6	0
203572_s_at	TAF6	560.152	569.735	671.331	304.037	475.139	0.697302	0.723393	1	0	0.465845	3	2	1	5	4	5	0.863713	0.8	0
214112_s_at	CXorf40A;CXorf40B	511.066	748.117	550.123	359.592	551.192	0.389869	1	0.490396	0	0.493147	4	1	3	5	2	2	0.863469	0.9	0
201587_s_at	IRAK1	1878.38	6043.55	5114.64	1723.87	5662.69	0.0357689	1	0.784959	0	0.911831	4	1	3	5	2	5	0.863113	0.9	0
216737_at	216737_at	24.9587	33.1815	31.7466	11.3526	42.1526	0.441756	0.708731	0.662143	0	1	4	2	3	5	1	0	0.862926	0.7	0
215376_at	215376_at	16.0096	44.6102	32.7345	9.63814	44.1274	0.182187	1	0.660423	0	0.986195	4	1	3	5	2	0	0.862397	0.9	0
212861_at	MFSD5	423.432	904.574	625.052	292.555	564.111	0.213845	1	0.543279	0	0.443705	4	1	2	5	3	5	0.862382	1	0
221059_s_at	COTL1	1095.68	2594.96	1585.9	348.702	2455.39	0.332543	1	0.550782	0	0.937866	4	1	3	5	2	4	0.862364	0.9	0
216714_at	CCL13	3.36123	10.8425	7.15455	1.34351	10.3748	0.212414	1	0.611753	0	0.950763	4	1	3	5	2	5	0.862209	0.9	0
205929_at	GPA33	5.80088	21.8586	15.0839	2.58775	9.84543	0.166735	1	0.648448	0	0.376614	4	1	2	5	3	5	0.862194	1	0
213639_s_at	ZNF500	177.852	192.968	213.453	104.864	147.649	0.672149	0.811353	1	0	0.394009	3	2	1	5	4	4	0.861998	0.8	0
207133_x_at	ALPK1	54.8248	122.252	73.6244	8.78412	51.7697	0.40576	1	0.571442	0	0.378835	3	1	2	5	4	4	0.861767	0.9	0
203213_at	CDC2	863.209	1200.6	1927.52	220.695	1807.94	0.376438	0.57411	1	0	0.92994	4	3	1	5	2	1	0.86175	0.7	0
210260_s_at	TNFAIP8	602.492	650.004	548.082	220.842	690.703	0.812261	0.913381	0.696461	0	1	3	2	4	5	1	2	0.861746	0.5	0
219279_at	DOCK10	69.069	313.823	475.736	5.34636	409.56	0.135468	0.65579	1	0	0.859317	4	3	1	5	2	2	0.861613	0.7	0
216212_s_at	DKC1	593.904	1599.53	992.94	369.458	1135.94	0.182466	1	0.506866	0	0.62312	4	1	3	5	2	5	0.861318	0.9	0
213947_s_at	NUP210	242.043	289.11	438.624	132.66	305.393	0.357503	0.511335	1	0	0.564553	4	3	1	5	2	5	0.861284	0.7	0
222167_at	222167_at	34.5942	50.7042	38.5896	8.57448	24.4505	0.61761	1	0.712445	0	0.376837	3	1	2	5	4	4	0.860834	0.9	0
204334_at	KLF7	219.578	507.675	287.197	95.171	337.217	0.30159	1	0.465513	0	0.586772	4	1	3	5	2	5	0.860811	0.9	0
212256_at	GALNT10	703.954	1310.23	1426.28	145.724	518.265	0.435928	0.909375	1	0	0.290921	3	2	1	5	4	1	0.860768	0.8	0
208021_s_at	RFC1	457.125	509.288	510.955	420.147	446.509	0.407211	0.981643	1	0	0.290305	3	2	1	5	4	0	0.86043	0.8	0
211040_x_at	GTSE1	335.934	588.991	313.361	65.9922	419.477	0.516142	1	0.472982	0	0.675881	3	1	4	5	2	5	0.860298	0.7	0
204244_s_at	DBF4	512.195	1499.21	859.081	137.447	711.411	0.275193	1	0.529926	0	0.421486	4	1	2	5	3	5	0.860123	1	0
215093_at	NSDHL	563.214	676.609	762.023	417.282	525.414	0.423309	0.752237	1	0	0.313662	3	2	1	5	4	0	0.85995	0.8	0
213535_s_at	UBE2I	3604.72	4297.98	4831.97	2466.35	3217.48	0.481214	0.774271	1	0	0.317519	3	2	1	5	4	5	0.859719	0.8	0
206442_at	SEMG1	10.1066	22.5431	27.575	7.86553	27.0148	0.113705	0.744696	1	0	0.971577	4	3	1	5	2	5	0.859544	0.7	0
215218_s_at	WDR62	58.1323	105.392	126.423	36.7463	65.7818	0.238479	0.76548	1	0	0.32378	4	2	1	5	3	1	0.859278	0.9	0
213865_at	DCBLD2	217.313	507.064	420.421	217.255	408.557	0.000200132	1	0.701034	0	0.660097	4	1	2	5	3	5	0.859258	1	0
206776_x_at	ACRV1	10.2635	24.8682	24.5802	7.62428	13.6498	0.153052	1	0.983298	0	0.349429	4	1	2	5	3	5	0.859103	1	0
220070_at	JMJD5	29.5347	55.402	41.0208	23.2193	37.016	0.196236	1	0.553139	0	0.428699	4	1	2	5	3	0	0.859053	1	0
217900_at	IARS2	3457.45	3575.32	3936.63	2814.19	3259.92	0.573091	0.678103	1	0	0.397108	3	2	1	5	4	2	0.858724	0.8	0
202503_s_at	KIAA0101	5753.04	5706.77	8975.46	2193.37	7402.26	0.524863	0.518041	1	0	0.768036	3	4	1	5	2	5	0.858447	0.4	0
205296_at	RBL1	116.753	159.262	213.387	84.7073	141.107	0.249035	0.579382	1	0	0.438295	4	2	1	5	3	5	0.858203	0.9	0
213944_x_at	GNA11	188.386	465.25	345.033	101.905	218.456	0.238013	1	0.669138	0	0.320772	4	1	2	5	3	5	0.857822	1	0
209622_at	STK16	381.643	501.953	335.458	137.624	449.653	0.669776	1	0.543009	0	0.856448	3	1	4	5	2	1	0.857803	0.7	0
214617_at	PRF1	30.3959	34.7463	45.8831	23.4494	37.2851	0.309646	0.503568	1	0	0.616737	4	3	1	5	2	3	0.857802	0.7	0
200913_at	PPM1G	499.048	1221.22	1346.66	526.78	1115.45	0	0.852008	1	0.0327178	0.727222	5	2	1	4	3	1	0.857669	0.8	0
201697_s_at	DNMT1	1147.11	2038.51	1428.76	875.142	1565.31	0.233776	1	0.475875	0	0.59325	4	1	3	5	2	5	0.857529	0.9	0
220688_s_at	MRTO4	673.457	951.655	1167.29	578.971	833.535	0.160603	0.633473	1	0	0.432697	4	2	1	5	3	2	0.856875	0.9	0
219512_at	DSN1	423.414	401.386	390.522	111.202	443.342	0.940001	0.87368	0.840971	0	1	2	3	4	5	1	5	0.856622	0.2	0
214758_at	WDR21A	30.015	91.1489	56.1356	19.0221	60.1884	0.152411	1	0.514559	0	0.570749	4	1	3	5	2	5	0.856248	0.9	0
209848_s_at	SILV	34.9191	44.647	33.5937	4.86503	23.655	0.75547	1	0.722153	0	0.472324	2	1	3	5	4	5	0.855919	0.7	0
210929_s_at	LOC100131613;AHSG	4.23606	19.5327	29.1812	1.28817	14.3973	0.105686	0.654089	1	0	0.469979	4	2	1	5	3	2	0.855808	0.9	0
219255_x_at	IL17RB	27.7097	67.068	44.8474	2.83096	22.6609	0.387296	1	0.654084	0	0.308699	3	1	2	5	4	5	0.855338	0.9	0
208548_at	IFNA6	1.31489	16.4802	11.485	1.26435	11.2227	0.00332154	1	0.671711	0	0.654472	4	1	2	5	3	5	0.855163	1	0
215942_s_at	GTSE1	148.663	279.84	179.009	40.3489	290.989	0.43215	0.955518	0.553224	0	1	4	2	3	5	1	0	0.854692	0.7	0
204130_at	HSD11B2	6.68913	17.1018	24.0316	2.75068	23.7698	0.18507	0.674366	1	0	0.987698	4	3	1	5	2	0	0.854517	0.7	0
203941_at	INTS9	102.894	377.873	353.761	88.2647	204.43	0.0505141	1	0.916743	0	0.401112	4	1	2	5	3	5	0.854404	1	0
209003_at	SLC25A11	375.029	406.631	477.699	282.043	494.77	0.437114	0.585671	0.919752	0	1	4	3	2	5	1	0	0.854392	0.6	0
213649_at	SFRS7	836.015	1182.73	1174.8	721.947	1335.95	0.185778	0.750457	0.737542	0	1	4	2	3	5	1	0	0.854362	0.7	0
218669_at	RAP2C	800.783	796.904	1139.52	449.332	892.633	0.509211	0.50359	1	0	0.64229	3	4	1	5	2	4	0.854153	0.4	0
218014_at	NUP85	777.738	1236.15	1640.35	383.281	794.999	0.313791	0.678458	1	0	0.327522	4	2	1	5	3	0	0.853837	0.9	0
209482_at	POP7	878.725	2197.02	1485.55	463.318	1075.07	0.239607	1	0.589624	0	0.352859	4	1	2	5	3	1	0.853565	1	0
220882_at	220882_at	1.80323	4.00859	3.46647	1.5481	2.40454	0.103691	1	0.77967	0	0.348077	4	1	2	5	3	1	0.853056	1	0
207598_x_at	XRCC2	126.821	273.821	198.309	64.5376	129.3	0.297603	1	0.639188	0	0.309448	4	1	2	5	3	4	0.852775	1	0
212081_x_at	BAT2	196.773	361.808	235.414	104.141	338.156	0.359503	1	0.509468	0	0.908207	4	1	3	5	2	0	0.852644	0.9	0
212048_s_at	YARS	1613.4	2148.4	1902.07	1536.87	1790.11	0.125145	1	0.597191	0	0.414109	4	1	2	5	3	3	0.852475	1	0
204092_s_at	AURKA	1221.78	1366.19	1459.84	565.759	1807.65	0.528244	0.644526	0.719935	0	1	4	3	2	5	1	5	0.852455	0.6	0
208511_at	PTTG3	87.177	76.9917	89.1357	32.6975	81.4339	0.965295	0.784827	1	0	0.863536	2	4	1	5	3	2	0.852338	0.3	0
220085_at	HELLS	428.969	530.463	695	118.732	317.408	0.538355	0.714478	1	0	0.344763	3	2	1	5	4	0	0.852218	0.8	0
218115_at	ASF1B	449.98	624.341	381.623	35.4432	357.376	0.70392	1	0.587844	0	0.54667	2	1	3	5	4	5	0.851703	0.7	0
211222_s_at	HAP1	25.1425	34.8678	41.7414	3.47943	54.3743	0.425643	0.61673	0.751784	0	1	4	3	2	5	1	5	0.851501	0.6	0
216305_s_at	C2orf3	201.249	300.539	416.999	142.1	261.898	0.215166	0.576353	1	0	0.435789	4	2	1	5	3	5	0.851492	0.9	0
205020_s_at	ARL4A	712.592	1451.36	767.212	158.376	798.718	0.428633	1	0.470877	0	0.495244	4	1	3	5	2	5	0.851111	0.9	0
215593_at	215593_at	37.4673	36.8399	32.6167	2.16956	42.1894	0.882006	0.866329	0.760801	0	1	2	3	4	5	1	0	0.850971	0.2	0
217650_x_at	ST3GAL2	213.634	195.628	280.994	57.7793	279.733	0.698228	0.617561	1	0	0.994351	3	4	1	5	2	5	0.850855	0.4	0
217768_at	C14orf166	4243.92	6772.74	6979.85	4004.69	7419.42	0.0700582	0.81062	0.871272	0	1	4	3	2	5	1	5	0.850471	0.6	0
218755_at	KIF20A	715.602	938.34	834.2	224.547	1208.22	0.499206	0.725641	0.619772	0	1	4	2	3	5	1	0	0.850242	0.7	0
201563_at	SORD	365.424	1175.68	789.531	270.935	998.588	0.104437	1	0.573196	0	0.804263	4	1	3	5	2	5	0.849849	0.9	0
218548_x_at	TEX264	384.123	476.62	382.339	301.451	440.811	0.471956	1	0.461771	0	0.795575	3	1	4	5	2	3	0.84965	0.7	0
204781_s_at	FAS	126.847	617.448	471.291	40.5006	221.483	0.149661	1	0.746672	0	0.31369	4	1	2	5	3	5	0.84961	1	0
208640_at	RAC1	9383.5	9625.59	9381.42	5305.03	7717.05	0.943968	1	0.943486	0	0.558266	2	1	3	5	4	5	0.849558	0.7	0
AFFX-BioDn-3_at	#VALUE!	4375.35	4339.03	4606.97	4045.17	4400.8	0.587718	0.523069	1	0	0.633019	3	4	1	5	2	5	0.849507	0.4	0
212448_at	NEDD4L	121.181	144.148	142.088	74.0962	97.4193	0.672143	1	0.970593	0	0.332941	3	1	2	5	4	0	0.849355	0.9	0
213668_s_at	SOX4	149.978	599.806	399.565	48.7779	232.431	0.183657	1	0.636605	0	0.333292	4	1	2	5	3	5	0.849072	1	0
219120_at	C2orf44	80.6436	251.157	237.556	85.4348	247.285	0	1	0.920235	0.0280987	0.977292	5	1	3	4	2	3	0.849019	0.8	0
216766_at	216766_at	95.6258	125.306	72.3838	1.79654	104.965	0.759693	1	0.571513	0	0.835308	3	1	4	5	2	5	0.848821	0.7	0
218760_at	COQ6	177.501	193.739	201.846	100.385	244.465	0.53523	0.647932	0.704199	0	1	4	3	2	5	1	5	0.848639	0.6	0
215151_at	DOCK10	3.3979	43.1144	35.6111	5.69526	33.6665	0	1	0.811079	0.057844	0.762117	5	1	2	4	3	3	0.848271	0.9	0
216026_s_at	POLE	161.592	226.723	393.337	58.069	230.735	0.308777	0.503042	1	0	0.515009	4	3	1	5	2	0	0.848164	0.7	0
212087_s_at	ERAL1	438.627	622.589	715.965	398.654	713.474	0.125974	0.705727	1	0	0.99215	4	3	1	5	2	5	0.847993	0.7	0
217112_at	PDGFB	1.90738	3.35438	3.38585	1.51374	4.0016	0.158224	0.739849	0.752498	0	1	4	3	2	5	1	5	0.847354	0.6	0
44120_at	ADCK2	135.935	288.313	281.659	74.5543	369.152	0.208354	0.725595	0.703009	0	1	4	2	3	5	1	5	0.847045	0.7	0
214541_s_at	QKI	2.40338	3.79594	3.0753	2.1179	2.75715	0.170127	1	0.570547	0	0.38095	4	1	2	5	3	0	0.84686	1	0
203975_s_at	CHAF1A	116.302	457.955	252.972	42.13	233.648	0.178373	1	0.507045	0	0.460574	4	1	2	5	3	5	0.846715	1	0
205162_at	ERCC8;FLJ12595	182.872	234.301	353.908	79.7682	345.467	0.376099	0.563701	1	0	0.969209	4	3	1	5	2	1	0.84668	0.7	0
215726_s_at	CYB5A	247.79	1581.24	2019.4	215.931	1056.08	0.0176654	0.757046	1	0	0.465852	4	2	1	5	3	0	0.846505	0.9	0
214170_x_at	FH	978.447	1500.08	1283.06	755.887	956.922	0.299062	1	0.708382	0	0.270138	3	1	2	5	4	5	0.846399	0.9	0
208636_at	ACTN1	2587.01	6810.87	4913.44	2378.59	5233.24	0.0470232	1	0.571907	0	0.644059	4	1	3	5	2	2	0.845969	0.9	0
38892_at	KIAA0240	172.929	187.493	179.766	163.852	170.494	0.383952	1	0.673153	0	0.280953	3	1	2	5	4	5	0.845887	0.9	0
206852_at	EPHA7	2.2546	3.02029	4.38329	1.22443	4.25776	0.326121	0.568515	1	0	0.960261	4	3	1	5	2	0	0.845881	0.7	0
209539_at	ARHGEF6	2.23613	13.239	7.31138	0.941247	8.09263	0.105294	1	0.517992	0	0.581519	4	1	3	5	2	0	0.845735	0.9	0
214652_at	DRD1	4.76648	24.579	31.7756	3.93834	29.0489	0.0297493	0.741476	1	0	0.902049	4	3	1	5	2	0	0.845688	0.7	0
207862_at	UPK2	7.69179	25.9788	20.3091	4.62018	28.0419	0.131144	0.911915	0.669845	0	1	4	2	3	5	1	0	0.845576	0.7	0
215129_at	PIK3C2G	24.6048	35.9458	19.5656	2.395	29.8928	0.661975	1	0.511779	0	0.819587	3	1	4	5	2	5	0.845387	0.7	0
64371_at	SFRS14	109.508	96.7891	106.906	34.4869	110.683	0.984579	0.817656	0.950431	0	1	2	4	3	5	1	5	0.845286	0.1	0
213504_at	COPS6	573.321	957.947	731.094	468.666	910.661	0.213895	1	0.536354	0	0.903356	4	1	3	5	2	5	0.844443	0.9	0
215272_at	TADA3L	19.8789	30.7171	20.5327	1.83008	12.9285	0.624807	1	0.64744	0	0.384201	3	1	2	5	4	0	0.844303	0.9	0
202189_x_at	PTBP1	2854.62	4603.34	5024.82	2967.76	4370.7	0	0.805787	1	0.0521334	0.69859	5	2	1	4	3	4	0.844262	0.8	0
38158_at	ESPL1	362.024	994.773	916.384	93.3726	1318.78	0.219234	0.735592	0.671623	0	1	4	2	3	5	1	5	0.844186	0.7	0
216852_x_at	IGL@	2.8843	5.41962	6.27751	1.29889	2.60253	0.318444	0.827685	1	0	0.261848	3	2	1	5	4	5	0.844161	0.8	0
201923_at	PRDX4	4337.73	5493.32	7408.75	3526.25	5839.94	0.20901	0.50665	1	0	0.595928	4	3	1	5	2	5	0.844104	0.7	0
56748_at	TRIM10	17.682	15.7101	23.4485	2.44268	24.1717	0.701335	0.610585	0.966717	0	1	3	4	2	5	1	5	0.84386	0.3	0
219037_at	RRP15	578.837	1030.76	955.056	518.205	675.224	0.118294	1	0.852301	0	0.306346	4	1	2	5	3	5	0.84369	1	0
219510_at	POLQ	153.999	228.052	429.46	39.925	314.037	0.292847	0.482953	1	0	0.70369	4	3	1	5	2	0	0.842804	0.7	0
205800_at	205800_at	1.65218	1.892	2.38108	1.00133	1.46932	0.471716	0.64553	1	0	0.339185	3	2	1	5	4	5	0.84251	0.8	0
207805_s_at	PSMD9	940.92	1330.69	1417.51	969.858	1264.19	0	0.817831	1	0.0607189	0.678298	5	2	1	4	3	2	0.842076	0.8	0
213384_x_at	PLCB3	83.697	105.037	84.9793	69.8596	95.0461	0.393361	1	0.429813	0	0.715985	4	1	3	5	2	5	0.842055	0.9	0
213242_x_at	KIAA0284	82.3563	350.439	279.148	95.3232	241.401	0	1	0.734071	0.048369	0.593267	5	1	2	4	3	0	0.841649	0.9	0
201368_at	ZFP36L2	946.937	1568.33	1952.12	381.812	804.843	0.359882	0.755596	1	0	0.269394	3	2	1	5	4	5	0.841286	0.8	0
213008_at	FANCI	536.971	643.604	1093.51	247.277	788.738	0.342334	0.468343	1	0	0.639849	4	3	1	5	2	0	0.841162	0.7	0
212801_at	CIT	162.354	242.53	506.025	7.41563	318.818	0.310741	0.47154	1	0	0.624542	4	3	1	5	2	4	0.840843	0.7	0
209121_x_at	NR2F2	256.712	803.941	483.634	168.482	626.5	0.138845	1	0.495944	0	0.720767	4	1	3	5	2	5	0.840741	0.9	0
201529_s_at	RPA1	1322.69	1312.16	1637.86	752.586	1145.7	0.643986	0.632091	1	0	0.444059	2	3	1	5	4	5	0.840734	0.5	0
218200_s_at	NDUFB2	7422.81	8435.08	8057	6099.97	6750.1	0.5665	1	0.838089	0	0.278415	3	1	2	5	4	5	0.840639	0.9	0
204405_x_at	DIMT1L	2053.07	1846.34	2766.08	747.773	2519.33	0.646729	0.544301	1	0	0.877744	3	4	1	5	2	0	0.840443	0.4	0
205590_at	RASGRP1	37.3304	38.2263	75.8957	2.61322	43.6793	0.473745	0.48597	1	0	0.560381	4	3	1	5	2	0	0.84033	0.7	0
218963_s_at	KRT23	4.2676	30.311	17.4522	2.38545	21.5037	0.0673989	1	0.539533	0	0.684615	4	1	3	5	2	1	0.84032	0.9	0
217610_at	POLR2J4	137.761	209.172	181.535	33.3356	83.9369	0.593878	1	0.842825	0	0.287775	3	1	2	5	4	4	0.840155	0.9	0
214476_at	TFF2	3.30098	49.7529	46.9999	5.22618	50.6602	0	0.980842	0.922712	0.040651	1	5	2	3	4	1	5	0.840152	0.6	0
203994_s_at	C21orf2	25.0192	88.8118	87.5453	31.5292	71.8136	0	1	0.980147	0.102049	0.73354	5	1	2	4	3	4	0.83981	0.9	0
203358_s_at	EZH2	353.958	852.299	818.685	184.863	353.926	0.25335	1	0.949637	0	0.253302	3	1	2	5	4	5	0.839756	0.9	0
218625_at	NRN1	47.2556	41.6729	50.0131	9.34315	35.248	0.932198	0.79493	1	0	0.636953	2	3	1	5	4	0	0.839515	0.5	0
207552_at	ATP5G2	17.1572	15.8512	29.6699	2.79965	20.3954	0.534329	0.485725	1	0	0.654841	3	4	1	5	2	0	0.839451	0.4	0
221889_at	KCTD13	116.809	166.136	147.229	117.124	149.079	0	1	0.616701	0.00638595	0.654206	5	1	3	4	2	2	0.839388	0.8	0
218719_s_at	GINS3	213.342	492.938	333.567	76.2282	541.765	0.294528	0.895117	0.552779	0	1	4	2	3	5	1	4	0.839016	0.7	0
45633_at	GINS3	171.293	436.409	260.225	70.5329	414.67	0.275394	1	0.51846	0	0.940584	4	1	3	5	2	5	0.838803	0.9	0
204305_at	MIPEP	114.96	300.56	267.276	33.7811	96.8922	0.304293	1	0.875238	0	0.236567	3	1	2	5	4	4	0.838779	0.9	0
212315_s_at	NUP210	75.5276	118.131	155.337	68.442	125.193	0.0815421	0.571828	1	0	0.653099	4	3	1	5	2	0	0.838597	0.7	0
201952_at	ALCAM	1084.6	6913.52	4508.36	1036.35	4915.01	0.00820973	1	0.590762	0	0.659954	4	1	3	5	2	5	0.838136	0.9	0
215866_at	215866_at	30.9633	98.5238	93.8254	27.3642	51.7808	0.0505779	1	0.933974	0	0.343124	4	1	2	5	3	1	0.837825	1	0
200724_at	RPL10	69.2427	66.3742	60.0519	22.5425	60.7229	1	0.938576	0.803196	0	0.817564	1	2	4	5	3	5	0.83751	0.3	0
203410_at	AP3M2	132.703	271.956	422.659	73.1616	220.471	0.170363	0.568801	1	0	0.421489	4	2	1	5	3	5	0.837487	0.9	0
200657_at	SLC25A5	4773.55	6736.8	8560.96	4070.89	8124.65	0.156492	0.593735	1	0	0.902828	4	3	1	5	2	5	0.837208	0.7	0
218834_s_at	TMEM132A	189.97	234.668	204.852	63.5809	126.53	0.738741	1	0.825726	0	0.367936	3	1	2	5	4	1	0.837162	0.9	0
202600_s_at	NRIP1	501.435	1441.66	1498.8	102.515	446.188	0.285701	0.959077	1	0	0.246134	3	2	1	5	4	5	0.837102	0.8	0
AFFX-r2-Bs-thr-3_s_at	AFFX-r2-Bs-thr-3_s_at	687.878	1140.51	987.212	593.442	744.288	0.172622	1	0.719783	0	0.275735	4	1	2	5	3	0	0.836993	1	0
210483_at	TNFRSF10C;MGC31957	13.9621	26.2177	48.8875	3.81521	27.3388	0.225125	0.497035	1	0	0.521908	4	3	1	5	2	0	0.836831	0.7	0
216158_at	216158_at	17.98	25.5136	33.8226	1.28689	10.7894	0.51307	0.744619	1	0	0.292064	3	2	1	5	4	5	0.836819	0.8	0
202126_at	PRPF4B	798.996	1000.58	1002.22	821.047	947.759	0	0.99193	1	0.108506	0.732015	5	2	1	4	3	5	0.836743	0.8	0
210013_at	HPX	2.96248	34.6222	34.2465	4.1103	37.1754	0	0.925373	0.914392	0.0335493	1	5	2	3	4	1	0	0.836492	0.6	0
34260_at	TELO2	77.0747	243.91	146.336	53.3807	153.86	0.124359	1	0.487879	0	0.527369	4	1	3	5	2	5	0.836402	0.9	0
207407_x_at	CYP4A11	1.42766	6.4645	6.12198	1.06641	2.82446	0.0669218	1	0.936548	0	0.32568	4	1	2	5	3	1	0.83629	1	0
203976_s_at	CHAF1A	75.4514	242.423	168.745	43.6657	105.661	0.159922	1	0.629307	0	0.311915	4	1	2	5	3	5	0.836068	1	0
221753_at	SSH1	263.5	340.303	362.958	188.444	432.722	0.307256	0.621665	0.714407	0	1	4	3	2	5	1	0	0.836003	0.6	0
207324_s_at	DSC1	1.72252	18.7782	27.2897	0.817394	23.9385	0.0341914	0.678475	1	0	0.873407	4	3	1	5	2	2	0.835602	0.7	0
207622_s_at	ABCF2	689.616	1373	846.044	444.379	1107.88	0.264087	1	0.432539	0	0.714501	4	1	3	5	2	5	0.835438	0.9	0
220165_at	INO80D	23.6344	59.6404	40.6994	19.076	36.4179	0.112374	1	0.533063	0	0.427515	4	1	2	5	3	5	0.834978	1	0
201957_at	PPP1R12B	96.4809	109.522	139.563	60.4758	86.9898	0.455258	0.620153	1	0	0.33525	3	2	1	5	4	5	0.834932	0.8	0
222319_at	222319_at	22.7769	32.6237	41.9481	2.82842	13.8347	0.509935	0.761644	1	0	0.281349	3	2	1	5	4	4	0.83483	0.8	0
209053_s_at	WHSC1	488.148	605.44	486.377	204.866	361.654	0.70719	1	0.702769	0	0.391408	2	1	3	5	4	5	0.834652	0.7	0
212193_s_at	LARP1	867.475	893.537	1051.76	501.916	711.268	0.664841	0.71224	1	0	0.380748	3	2	1	5	4	2	0.834307	0.8	0
201478_s_at	DKC1	945.384	2867.37	2305.17	1052.88	2371.47	0	1	0.70749	0.0559296	0.741986	5	1	3	4	2	5	0.834122	0.8	0
213641_at	ZNF500	72.3686	79.2518	108.185	47.1889	72.5952	0.412808	0.525655	1	0	0.416523	4	2	1	5	3	5	0.834062	0.9	0
216101_at	216101_at	34.7441	70.6436	31.5901	3.0217	44.6548	0.469114	1	0.422473	0	0.615675	3	1	4	5	2	5	0.833953	0.7	0
202848_s_at	GRK6	77.0747	65.1112	89.9568	28.3831	77.9433	0.790786	0.59649	1	0	0.804892	3	4	1	5	2	5	0.833909	0.4	0
212706_at	RASA4;RASA4P;LOC100133005;LOC100134722;LOC100132214	67.0281	103.789	87.3948	40.3065	55.7164	0.420929	1	0.741752	0	0.242742	3	1	2	5	4	1	0.833854	0.9	0
219307_at	PDSS2	123.387	416.415	301.577	126.321	286.282	0	1	0.608099	0.0100127	0.555903	5	1	2	4	3	5	0.833717	0.9	0
219392_x_at	PRR11	706.071	1861.62	1388.53	285.765	678.058	0.266716	1	0.699788	0	0.24894	3	1	2	5	4	1	0.833711	0.9	0
222228_s_at	ALKBH4	52.1619	75.1265	74.4766	50.3882	81.3198	0.0573427	0.799774	0.778763	0	1	4	2	3	5	1	5	0.833649	0.7	0
217330_at	DISC1	13.8775	14.6134	20.1436	5.20045	22.2388	0.509266	0.552457	0.87703	0	1	4	3	2	5	1	3	0.83363	0.6	0
200616_s_at	KIAA0152	1538.48	1422.57	2074.04	753.842	1851.25	0.594334	0.506536	1	0	0.831245	3	4	1	5	2	3	0.833626	0.4	0
220819_at	FRMD1	17.8512	32.4945	15.2501	2.23604	22.5679	0.516059	1	0.430097	0	0.67194	3	1	4	5	2	5	0.833338	0.7	0
213334_x_at	TREX2;UCHL5IP	121.459	505.778	381.246	129.214	303.898	0	1	0.675967	0.0201785	0.474707	5	1	2	4	3	2	0.833278	0.9	0
210966_x_at	LARP1	791.314	912.392	955.126	524.022	648.15	0.620017	0.900873	1	0	0.287931	3	2	1	5	4	5	0.833256	0.8	0
201922_at	TINP1	5629.71	5750.43	6849.23	3717.15	4923.98	0.610636	0.649179	1	0	0.385313	3	2	1	5	4	5	0.833222	0.8	0
208254_at	C15orf31	3.15049	9.02212	11.1999	1.88551	4.66972	0.135809	0.766192	1	0	0.298915	4	2	1	5	3	5	0.833145	0.9	0
212792_at	DPY19L1	1204.31	2605.4	2733.21	978.011	1477.44	0.128931	0.927182	1	0	0.284543	4	2	1	5	3	0	0.833044	0.9	0
212468_at	SPAG9	134.694	192.052	179.399	118.951	212.752	0.167834	0.77932	0.644428	0	1	4	2	3	5	1	0	0.832904	0.7	0
201251_at	PKM2	9054.94	8235.54	12094	3948.1	8671.64	0.626922	0.526331	1	0	0.579867	2	4	1	5	3	2	0.832693	0.3	0
210801_at	DIMT1L	11.1178	20.6106	17.1986	1.3944	28.3309	0.360975	0.713389	0.586721	0	1	4	2	3	5	1	5	0.832563	0.7	0
218693_at	TSPAN15	65.2252	238.161	135.391	8.5339	82.265	0.246884	1	0.552448	0	0.321091	4	1	2	5	3	0	0.832349	1	0
200627_at	PTGES3	7554.66	8890.07	9580.18	6879.03	7587.1	0.250127	0.744513	1	0	0.262136	4	2	1	5	3	5	0.832135	0.9	0
204099_at	SMARCD3	130.862	269.452	149.864	61.9574	167.148	0.332079	1	0.423657	0	0.506956	4	1	3	5	2	5	0.832029	0.9	0
218506_x_at	N-PAC	289.083	504.456	502.552	203.597	274.876	0.28414	1	0.993671	0	0.236918	3	1	2	5	4	5	0.831993	0.9	0
206891_at	ACTN3	19.689	33.2694	29.5014	18.3198	34.9218	0.082472	0.90047	0.673509	0	1	4	2	3	5	1	0	0.831975	0.7	0
203025_at	ARD1A	325.813	1033.73	867.925	363.477	676.872	0	1	0.765785	0.053204	0.495904	5	1	2	4	3	5	0.831888	0.9	0
202111_at	SLC4A2	386.784	782.053	886.361	357.397	537.169	0.0555558	0.802807	1	0	0.339857	4	2	1	5	3	5	0.831777	0.9	0
213587_s_at	ATP6V0E2	192.995	972.54	570.188	105.872	825.951	0.100526	1	0.535748	0	0.830859	4	1	3	5	2	2	0.831205	0.9	0
32094_at	CHST3	172.993	222.64	148.871	2.84417	107.834	0.774122	1	0.664375	0	0.47767	2	1	3	5	4	5	0.830788	0.7	0
219171_s_at	ZNF236	35.3217	44.9157	31.4168	16.9839	31.9447	0.656521	1	0.516719	0	0.535619	2	1	4	5	3	5	0.830682	0.6	0
212457_at	TFE3	347.292	702.867	722.697	232.748	351.005	0.233788	0.959526	1	0	0.241366	4	2	1	5	3	0	0.830517	0.9	0
212333_at	FAM98A	1586.82	2552.67	2257.17	1218.83	2937.74	0.214083	0.77598	0.604069	0	1	4	2	3	5	1	0	0.830468	0.7	0
208683_at	CAPN2	4966.93	11833.3	7372.14	2863.55	6149.15	0.234497	1	0.502644	0	0.366298	4	1	2	5	3	5	0.830144	1	0
210593_at	SAT1;KIAA0913	2.90108	16.1282	21.0944	3.86383	15.9584	0	0.727032	1	0.0529178	0.717699	5	2	1	4	3	5	0.829541	0.8	0
214201_x_at	BAT2	107.795	122.282	102.799	52.89	84.0075	0.79123	1	0.719233	0	0.448431	2	1	3	5	4	4	0.829528	0.7	0
215474_at	215474_at	75.6983	67.4708	70.4482	20.6682	60.2788	1	0.850491	0.904596	0	0.719799	1	3	2	5	4	1	0.829121	0.3	0
202094_at	BIRC5	374.935	416.538	888.531	31.55	627.823	0.400691	0.449237	1	0	0.695783	4	3	1	5	2	5	0.829092	0.7	0
204661_at	CD52	2.58701	28.3804	25.1232	5.22467	18.0026	0	1	0.87372	0.102261	0.597657	5	1	2	4	3	0	0.828958	0.9	0
203378_at	PCF11	293.241	450.089	501.992	284.867	362.66	0.0385676	0.760953	1	0	0.358287	4	2	1	5	3	5	0.828905	0.9	0
202962_at	KIF13B	38.9373	119.751	157.372	25.1998	67.9103	0.103936	0.715364	1	0	0.323143	4	2	1	5	3	5	0.828799	0.9	0
212843_at	NCAM1	14.0641	27.8664	14.4691	1.26754	11.9362	0.481094	1	0.496321	0	0.401095	3	1	2	5	4	5	0.828799	0.9	0
202309_at	MTHFD1	1386.57	4258.67	3515.84	1101.7	4695.63	0.0792642	0.878417	0.671727	0	1	4	2	3	5	1	5	0.828706	0.7	0
201674_s_at	AKAP1	388.676	1481.7	1280.57	199.714	522.11	0.147398	1	0.843111	0	0.251482	4	1	2	5	3	5	0.828566	1	0
217761_at	ADI1	1953.06	1786.09	2262.85	1197.21	1872.96	0.709292	0.552607	1	0	0.634126	2	4	1	5	3	5	0.828439	0.3	0
214898_x_at	MUC3B	33.9213	64.1564	90.5196	16.9093	39.0435	0.231109	0.641854	1	0	0.300694	4	2	1	5	3	5	0.82833	0.9	0
211729_x_at	BLVRA	874.852	3461.83	2448.6	716.634	3322.16	0.0576345	1	0.630908	0	0.949122	4	1	3	5	2	5	0.828329	0.9	0
215170_s_at	CEP152	85.1815	99.7646	128.746	64.3372	128.276	0.323625	0.55004	1	0	0.992703	4	3	1	5	2	1	0.828191	0.7	0
217999_s_at	PHLDA1	195.555	369.35	355.705	31.3768	109.033	0.485773	1	0.959627	0	0.22977	3	1	2	5	4	5	0.828182	0.9	0
201061_s_at	STOM	2195.39	4032.73	2680.45	1652.08	2835.13	0.228219	1	0.43197	0	0.496944	4	1	3	5	2	5	0.827951	0.9	0
212499_s_at	FCF1;MAPK1IP1L	630.517	740.392	605.592	503.954	678.651	0.53529	1	0.429872	0	0.73887	3	1	4	5	2	0	0.827789	0.7	0
220909_at	TRIM46	11.3875	21.0461	11.476	3.58483	19.1263	0.446856	1	0.451924	0	0.890054	4	1	3	5	2	0	0.827788	0.9	0
212443_at	NBEAL2	70.6508	162.735	177.051	46.0371	78.3046	0.187871	0.890729	1	0	0.246291	4	2	1	5	3	5	0.827617	0.9	0
220778_x_at	SEMA6B	11.1321	44.4139	29.0525	10.3842	34.5473	0.0219779	1	0.548588	0	0.710059	4	1	3	5	2	0	0.827426	0.9	0
204199_at	RALGPS1	36.3583	58.0291	114.711	3.96356	53.7295	0.29251	0.488188	1	0	0.449364	4	2	1	5	3	5	0.827147	0.9	0
217861_s_at	PREB	567.491	801.707	872.056	409.841	1045.89	0.247858	0.616094	0.726697	0	1	4	3	2	5	1	5	0.826598	0.6	0
212949_at	NCAPH	232.656	309.94	564.417	77.918	479.916	0.318064	0.476922	1	0	0.826308	4	3	1	5	2	0	0.82644	0.7	0
208006_at	FOXI1	2.68399	18.4946	21.1373	4.65493	16.8361	0	0.85679	1	0.106807	0.766914	5	2	1	4	3	4	0.826403	0.8	0
216842_x_at	RBMY1J;RBMY1H;RBMY3AP;RBMY1B;RBM;RBMY1E;RBMY1D;RBMY1A1;RBMY1F	23.1224	26.3856	28.0213	5.58491	13.6897	0.781654	0.927096	1	0	0.361234	3	2	1	5	4	5	0.826353	0.8	0
212533_at	WEE1	370	496.404	652.548	185.517	314.484	0.395012	0.665667	1	0	0.276142	3	2	1	5	4	5	0.826088	0.8	0
215546_at	PSMD5	14.7384	14.1953	14.7863	10.7804	15.845	0.781503	0.674268	0.790961	0	1	3	4	2	5	1	3	0.825645	0.3	0
218585_s_at	DTL	645.329	908.512	1832.08	92.8847	929.26	0.317644	0.468968	1	0	0.480898	4	3	1	5	2	5	0.825132	0.7	0
212787_at	YLPM1	776.767	1482.99	1333.75	737.77	958.617	0.0523295	1	0.799737	0	0.296351	4	1	2	5	3	0	0.824996	1	0
212538_at	DOCK9	302.128	795.273	769.591	196.646	340.675	0.176207	1	0.957098	0	0.240599	4	1	2	5	3	3	0.824909	1	0
218086_at	NPDC1	210.78	170.424	258.539	46.4165	187.556	0.774852	0.584603	1	0	0.665368	2	4	1	5	3	4	0.824798	0.3	0
213199_at	C2CD3	275.669	316.397	411.497	232.904	363.44	0.239455	0.467504	1	0	0.730913	4	3	1	5	2	5	0.824496	0.7	0
213298_at	NFIC	116.023	160.056	106.575	63.1466	146.016	0.545627	1	0.448134	0	0.855122	3	1	4	5	2	5	0.82428	0.7	0
211999_at	H3F3B;H3F3A	5526.04	8316.74	7002.15	4132.04	5095.58	0.333118	1	0.685858	0	0.230253	3	1	2	5	4	0	0.82427	0.9	0
219836_at	ZBED2	39.1338	85.3851	38.4437	2.57565	73.2654	0.441473	1	0.43314	0	0.853644	3	1	4	5	2	0	0.823923	0.7	0
210983_s_at	MCM7	932.376	3288.83	2850.17	897.83	1665.13	0.0144483	1	0.816537	0	0.320912	4	1	2	5	3	2	0.82364	1	0
217571_at	217571_at	29.1622	34.282	52.7302	7.12226	22.6101	0.483248	0.595505	1	0	0.339586	3	2	1	5	4	1	0.823623	0.8	0
219020_at	HS1BP3	100.728	552.273	395.364	117.44	468.425	0	1	0.652506	0.0370107	0.814309	5	1	3	4	2	1	0.823369	0.8	0
215619_at	215619_at	4.34122	16.7866	16.4252	0.953992	4.56498	0.21394	1	0.977174	0	0.228073	4	1	2	5	3	0	0.823119	1	0
37796_at	LRCH4	30.1827	61.8638	62.3118	34.7009	55.3498	0	0.986056	1	0.140626	0.783312	5	2	1	4	3	5	0.823106	0.8	0
214034_at	ERAP1	31.5769	32.1884	49.2339	18.6011	36.7332	0.423592	0.443554	1	0	0.591918	4	3	1	5	2	0	0.823041	0.7	0
220017_x_at	CYP2C9	9.87702	27.9957	14.0953	2.80926	13.128	0.280618	1	0.4481	0	0.409694	4	1	2	5	3	0	0.822998	1	0
212648_at	DHX29	955.817	888.637	1108.12	537.039	1153.36	0.67948	0.570479	0.926597	0	1	3	4	2	5	1	3	0.822985	0.3	0
220587_s_at	GBL	465.874	595.435	421.928	240.743	414.639	0.634723	1	0.510823	0	0.490273	2	1	3	5	4	5	0.822984	0.7	0
213941_x_at	RPS7	10818.2	13543.6	15074.5	10680.2	12489	0.0314043	0.651617	1	0	0.411624	4	2	1	5	3	5	0.822904	0.9	0
219413_at	ACBD4	61.6985	81.7013	111.25	53.1877	92.2225	0.14658	0.491086	1	0	0.672292	4	3	1	5	2	0	0.82249	0.7	0
219344_at	SLC29A3	70.6814	290.754	244.558	86.0369	175.461	0	1	0.790087	0.0697747	0.476114	5	1	2	4	3	1	0.822341	0.9	0
213682_at	NUP50	613.736	1425.49	1082.26	630.013	1082.61	0	1	0.577175	0.0200516	0.577606	5	1	3	4	2	5	0.822318	0.8	0
214200_s_at	COL6A1	14.1698	20.1729	20.8872	4.32664	30.0175	0.383139	0.616805	0.644609	0	1	4	3	2	5	1	5	0.82221	0.6	0
205023_at	RAD51	44.5421	50.0123	34.838	3.97358	31.9239	0.881183	1	0.670401	0	0.607105	2	1	3	5	4	5	0.822145	0.7	0
203022_at	RNASEH2A	894.009	1831.01	903.617	303.172	1325.43	0.386714	1	0.393003	0	0.669088	4	1	3	5	2	5	0.821987	0.9	0
204397_at	EML2	5.46975	48.0449	34.0941	3.71901	49.2055	0.0384892	0.974485	0.667783	0	1	4	2	3	5	1	5	0.821799	0.7	0
207054_at	IMPG1	1.05411	4.23919	2.21027	0.588919	2.73189	0.12744	1	0.444173	0	0.587072	4	1	3	5	2	5	0.821705	0.9	0
212301_at	RTF1	653.921	690.56	717.718	614.128	638.714	0.384139	0.737832	1	0	0.23734	3	2	1	5	4	0	0.82164	0.8	0
211995_x_at	ACTG1	14593.5	17560.9	19234.8	14035.7	19492.1	0.102229	0.646067	0.952844	0	1	4	3	2	5	1	5	0.821536	0.6	0
213179_at	RQCD1	406.117	802.049	877.456	365.54	510.099	0.079265	0.852697	1	0	0.282388	4	2	1	5	3	0	0.821434	0.9	0
214802_at	EXOC7	88.0104	111.697	89.0273	35.4716	62.1291	0.689256	1	0.702597	0	0.349719	3	1	2	5	4	0	0.821139	0.9	0
205454_at	HPCA	12.6807	15.5086	11.9214	3.42917	18.7595	0.603479	0.787943	0.55395	0	1	3	2	4	5	1	2	0.820972	0.5	0
201023_at	TAF7	2280.12	2494.14	2115.1	1507.83	2018.2	0.783009	1	0.615699	0	0.517454	2	1	3	5	4	5	0.820962	0.7	0
215727_x_at	215727_x_at	12.1846	20.5261	27.3934	1.46858	7.70939	0.41335	0.735107	1	0	0.240727	3	2	1	5	4	0	0.820943	0.8	0
208423_s_at	MSR1	5.21293	8.67973	11.5787	1.26082	14.4584	0.299457	0.562142	0.781801	0	1	4	3	2	5	1	5	0.820928	0.6	0
216415_at	DNAH3	20.3218	39.5682	20.1958	1.09063	40.1815	0.491961	0.984311	0.488737	0	1	3	2	4	5	1	0	0.820909	0.5	0
219989_s_at	ANKS1B	1.25483	3.45096	2.8689	1.47245	2.75887	0	1	0.734961	0.0990925	0.684859	5	1	2	4	3	5	0.820812	0.9	0
207212_at	SLC9A3	3.37968	6.4876	3.79684	2.00081	5.24932	0.307318	1	0.400293	0	0.724017	4	1	3	5	2	5	0.820527	0.9	0
220601_at	C16orf70	19.2335	44.2467	57.3651	18.0917	33.4242	0.0290731	0.665972	1	0	0.390404	4	2	1	5	3	5	0.820413	0.9	0
203664_s_at	POLR2D	466.331	727.332	729.242	480.923	766.115	0	0.87063	0.877001	0.048675	1	5	3	2	4	1	5	0.820191	0.5	0
207078_at	MED6	135.741	221.493	142.304	85.0056	147.884	0.371722	1	0.419807	0	0.46069	4	1	3	5	2	0	0.820157	0.9	0
219607_s_at	MS4A4A	1.42174	4.76864	6.10128	0.856032	2.34525	0.107852	0.745934	1	0	0.283918	4	2	1	5	3	1	0.820041	0.9	0
216071_x_at	MED12	112.36	260.905	214.663	111.861	259.291	0.003348	1	0.689743	0	0.989171	4	1	3	5	2	5	0.820024	0.9	0
206368_at	CPLX2	29.6306	40.127	56.7544	23.2358	37.8381	0.190784	0.503935	1	0	0.435648	4	2	1	5	3	5	0.819993	0.9	0
215604_x_at	215604_x_at	120.796	274.941	262.46	115.546	162.819	0.032937	1	0.921698	0	0.296578	4	1	2	5	3	3	0.819982	1	0
212020_s_at	MKI67	309.251	303.503	619.428	57.6892	424.935	0.447827	0.437594	1	0	0.653766	3	4	1	5	2	5	0.819891	0.4	0
209588_at	EPHB2	58.2008	218.911	170.667	32.0107	77.2179	0.140129	1	0.741873	0	0.241879	4	1	2	5	3	5	0.819879	1	0
201439_at	GBF1	166.765	346.422	258.919	132.033	193.666	0.162005	1	0.591849	0	0.287482	4	1	2	5	3	5	0.819749	1	0
203524_s_at	MPST	231.175	495.917	447.622	264.395	418.295	0	1	0.817577	0.125481	0.706801	5	1	2	4	3	3	0.819719	0.9	0
205527_s_at	GEMIN4	204.075	572.66	601.041	117.895	229.024	0.178373	0.941258	1	0	0.230011	4	2	1	5	3	5	0.819569	0.9	0
215370_at	215370_at	29.0063	56.504	66.8354	8.23443	20.6382	0.354463	0.823699	1	0	0.211665	3	2	1	5	4	0	0.819489	0.8	0
221685_s_at	CCDC99	615.195	790.973	1118	495.92	951.063	0.191736	0.474301	1	0	0.731647	4	3	1	5	2	3	0.819396	0.7	0
201665_x_at	RPS17	11827.5	13981.8	15871.5	11659.2	14300.8	0.0399544	0.551385	1	0	0.627116	4	3	1	5	2	5	0.819286	0.7	0
207400_at	NPY5R	25.7051	27.8152	38.0394	17.7116	36.842	0.39323	0.497034	1	0	0.941095	4	3	1	5	2	0	0.819161	0.7	0
203737_s_at	PPRC1	274.197	564.353	600.817	157.635	250.222	0.263012	0.917722	1	0	0.208914	3	2	1	5	4	5	0.819074	0.8	0
207115_x_at	MBTD1	104.339	159.579	211.265	73.5835	113.488	0.223382	0.624597	1	0	0.289832	4	2	1	5	3	3	0.818949	0.9	0
216195_at	ANK2	3.74613	28.0002	21.6481	2.19717	31.5505	0.0527695	0.879049	0.662648	0	1	4	2	3	5	1	1	0.818622	0.7	0
209680_s_at	KIFC1	232.473	360.747	294.754	43.2015	495.109	0.418828	0.702678	0.556646	0	1	4	2	3	5	1	1	0.818405	0.7	0
57540_at	RBKS	287.817	646.084	445.55	136.734	725.51	0.256605	0.8651	0.524505	0	1	4	2	3	5	1	5	0.818316	0.7	0
206946_at	HCN4	23.5789	39.6275	40.8694	23.1665	44.9129	0.0189641	0.756953	0.814061	0	1	4	3	2	5	1	4	0.818268	0.6	0
203764_at	DLGAP5	735.771	1255.88	1257.79	175.636	1893.5	0.326065	0.62883	0.629942	0	1	4	3	2	5	1	0	0.818169	0.6	0
218776_s_at	TMEM62	131.113	148.27	107.223	43.9874	108.185	0.835476	1	0.606387	0	0.615612	2	1	4	5	3	1	0.818011	0.6	0
201536_at	DUSP3	450.799	648.922	844.777	327.724	475.589	0.238032	0.621209	1	0	0.285976	4	2	1	5	3	5	0.817898	0.9	0
209832_s_at	CDT1	93.102	265.614	119.334	10.2046	228.155	0.324567	1	0.427272	0	0.853337	4	1	3	5	2	1	0.817489	0.9	0
217408_at	MRPS18B	311.834	703.751	512.495	306.285	520.28	0.0139609	1	0.518812	0	0.538398	4	1	3	5	2	5	0.817363	0.9	0
214594_x_at	ATP8B1	160.591	298.09	201.802	84.47	145.204	0.356338	1	0.549256	0	0.284309	3	1	2	5	4	5	0.817283	0.9	0
211359_s_at	OPRM1	13.432	12.4226	24.5767	2.29564	20.1511	0.499813	0.45451	1	0	0.801374	3	4	1	5	2	5	0.817001	0.4	0
221932_s_at	GLRX5	2150.8	3325.2	2603.59	2010.98	2699.54	0.10639	1	0.450921	0	0.523931	4	1	3	5	2	0	0.816874	0.9	0
211955_at	IPO5	534.05	1504.13	1288.19	559.255	883.064	0	1	0.7774	0.0259824	0.359779	5	1	2	4	3	5	0.816608	0.9	0
216477_at	216477_at	1.78357	2.71185	2.58993	1.25451	1.53304	0.363031	1	0.916341	0	0.191122	3	1	2	5	4	5	0.81647	0.9	0
204183_s_at	ADRBK2	163.367	199.635	138.746	68.1425	139.561	0.724182	1	0.536939	0	0.543137	2	1	4	5	3	5	0.816459	0.6	0
203040_s_at	HMBS	440.928	594.805	612.352	414.17	461.175	0.135017	0.91146	1	0	0.237181	4	2	1	5	3	5	0.81624	0.9	0
211271_x_at	PTBP1	2422.29	3235.54	3238.58	2463.79	3381.32	0	0.847992	0.851162	0.0432729	1	5	3	2	4	1	5	0.816047	0.5	0
215816_at	LOC91316	15.5787	27.8944	44.3771	1.80248	50.2354	0.284439	0.538723	0.879043	0	1	4	3	2	5	1	0	0.815786	0.6	0
200779_at	ATF4	6918.46	6829.76	6892.01	4409.02	5753.6	1	0.964653	0.98946	0	0.535809	1	3	2	5	4	5	0.815575	0.3	0
202813_at	TARBP1	524.77	550.61	732.232	154.97	352.682	0.64061	0.685373	1	0	0.3425	3	2	1	5	4	5	0.815511	0.8	0
215534_at	215534_at	3.65951	31.2722	22.8004	2.98588	11.7559	0.0238147	1	0.700498	0	0.310045	4	1	2	5	3	0	0.815481	1	0
217304_at	SHMT1	19.8999	42.5647	27.1886	15.5225	28.4713	0.161873	1	0.431404	0	0.478837	4	1	3	5	2	5	0.81516	0.9	0
219454_at	EGFL6	17.3459	19.6546	20.0811	3.9539	29.1991	0.530477	0.621928	0.638822	0	1	4	3	2	5	1	0	0.81512	0.6	0
218966_at	MYO5C	126.793	938.894	1309.89	145.479	1206.06	0	0.68642	1	0.0157941	0.912239	5	3	1	4	2	1	0.814819	0.6	0
204830_x_at	PSG5	4.42394	31.3621	20.6361	2.35356	11.1033	0.0713714	1	0.630247	0	0.301626	4	1	2	5	3	5	0.814755	1	0
219595_at	ZNF26	200.408	176.002	250.71	74.7097	166.786	0.714194	0.575523	1	0	0.52316	2	3	1	5	4	0	0.814565	0.5	0
217820_s_at	ENAH	1836.85	3044.63	2565.98	1287.12	1639.35	0.312789	1	0.727654	0	0.200414	3	1	2	5	4	0	0.81455	0.9	0
207050_at	CACNA2D1	47.5996	64.2002	89.7806	39.9489	77.6316	0.153531	0.486664	1	0	0.756199	4	3	1	5	2	0	0.814546	0.7	0
214339_s_at	MAP4K1	18.5487	50.7425	35.9691	18.0817	32.3379	0.0142985	1	0.547672	0	0.436493	4	1	2	5	3	0	0.814538	1	0
204478_s_at	RABIF	563.728	551.576	660.162	340.207	729.814	0.573709	0.542518	0.821225	0	1	3	4	2	5	1	5	0.814467	0.3	0
206687_s_at	PTPN6	299.523	304.285	403.233	62.9922	503.473	0.536983	0.547794	0.77243	0	1	4	3	2	5	1	1	0.814237	0.6	0
205536_at	LOC100128155;VAV2	50.8693	71.2476	51.6328	12.7688	32.0749	0.651527	1	0.664583	0	0.330138	3	1	2	5	4	5	0.814235	0.9	0
201361_at	TMEM109	528.225	781.152	461.954	234.661	663.423	0.53718	1	0.415914	0	0.784573	3	1	4	5	2	5	0.814226	0.7	0
217996_at	PHLDA1	647.779	1784.96	2244.22	156.696	609.637	0.235247	0.779998	1	0	0.216975	3	2	1	5	4	5	0.814201	0.8	0
211690_at	RPS6	6.10753	14.3062	7.73437	1.79686	6.09858	0.344596	1	0.474646	0	0.343881	3	1	2	5	4	3	0.814055	0.9	0
221483_s_at	ARPP-19	2174.07	2896.52	4809.69	1379.6	3693.84	0.231618	0.442239	1	0	0.674688	4	3	1	5	2	4	0.813985	0.7	0
208999_at	2008-09-01	393.126	582.286	377.142	224.174	538.812	0.471785	1	0.427151	0	0.878602	3	1	4	5	2	5	0.813958	0.7	0
202183_s_at	KIF22	255.5	556.1	352.613	172.864	311.346	0.215627	1	0.46903	0	0.361349	4	1	2	5	3	5	0.813686	1	0
222254_at	222254_at	16.4777	14.1671	24.4979	5.36449	19.1465	0.580827	0.460065	1	0	0.720311	3	4	1	5	2	5	0.813685	0.4	0
219675_s_at	UXS1	1008.53	1114.27	1286.81	844.439	1356.88	0.320214	0.52656	0.863262	0	1	4	3	2	5	1	3	0.81347	0.6	0
203613_s_at	NDUFB6	2445.75	2590.36	3045.54	2005.3	2343.34	0.423412	0.562428	1	0	0.324963	3	2	1	5	4	5	0.813299	0.8	0
220334_at	RGS17	18.5743	210.016	181.032	27.6593	227.898	0	0.914573	0.776108	0.0434017	1	5	2	3	4	1	5	0.813238	0.6	0
210625_s_at	AKAP1	178.292	334.827	255.297	106.303	156.379	0.315017	1	0.651984	0	0.219128	3	1	2	5	4	1	0.813089	0.9	0
203696_s_at	RFC2	547.704	1106.1	584.83	267.41	825.16	0.334205	1	0.378471	0	0.665025	4	1	3	5	2	5	0.812935	0.9	0
216811_at	216811_at	10.3909	60.3282	33.4027	8.45117	38.2503	0.0373909	1	0.480975	0	0.574419	4	1	3	5	2	5	0.812869	0.9	0
205037_at	RABL4	406.609	753.254	417.673	127.452	741.707	0.446079	1	0.463759	0	0.981548	4	1	3	5	2	5	0.812838	0.9	0
210480_s_at	MYO6	187.068	445.079	207.567	18.5162	186.738	0.395139	1	0.443196	0	0.394366	3	1	2	5	4	2	0.812726	0.9	0
221915_s_at	RANBP1	42.681	38.0259	60.6408	17.4534	42.0748	0.584143	0.476354	1	0	0.570106	2	4	1	5	3	5	0.812712	0.3	0
211628_x_at	FTHP1	11622.6	10323.5	13486.5	6944.55	11905.4	0.715085	0.516505	1	0	0.758314	3	4	1	5	2	5	0.812617	0.4	0
217998_at	LOC652993;PHLDA1	101.337	165.637	99.1399	53.8309	145.829	0.424897	1	0.405246	0	0.822836	3	1	4	5	2	1	0.812494	0.7	0
217874_at	SUCLG1	2831.34	2514.09	2730.11	1502.3	2590.12	1	0.761294	0.923832	0	0.818501	1	4	2	5	3	3	0.812343	0.1	0
204170_s_at	CKS2	3496.28	5301.21	6699.47	1909.14	2990.3	0.331322	0.708108	1	0	0.225696	3	2	1	5	4	4	0.812339	0.8	0
218981_at	ACN9	137.436	342.942	294.063	161.099	258.443	0	1	0.762153	0.115145	0.588825	5	1	2	4	3	4	0.812251	0.9	0
211039_at	CHRNA1	1.97761	16.6204	16.2436	0.676577	22.34	0.0600567	0.735979	0.718586	0	1	4	2	3	5	1	0	0.811897	0.7	0
201767_s_at	ELAC2	431.104	1138.11	1279.83	532.947	943.831	0	0.83302	1	0.119995	0.604114	5	2	1	4	3	5	0.811853	0.8	0
219327_s_at	GPRC5C	57.8363	264.241	262.048	45.3112	103.577	0.0572106	1	0.989983	0	0.266139	4	1	2	5	3	0	0.811853	1	0
201260_s_at	SYPL1	1152.24	1319.22	1612.94	1025.11	1548.11	0.21627	0.500332	1	0	0.889713	4	3	1	5	2	5	0.811737	0.7	0
214184_at	NPFF	32.2289	62.7313	57.5142	10.1403	19.896	0.420007	1	0.900799	0	0.185501	3	1	2	5	4	4	0.811465	0.9	0
208364_at	INPP4A	21.1862	20.4467	19.6725	2.49354	28.3123	0.723995	0.695353	0.665367	0	1	2	3	4	5	1	5	0.811354	0.2	0
218903_s_at	OBFC2B	447.764	779.928	458.644	236.178	483.227	0.389124	1	0.409133	0	0.454343	4	1	3	5	2	5	0.811292	0.9	0
36830_at	MIPEP	112.458	277.01	281.677	46.4965	91.2895	0.280472	0.980156	1	0	0.190462	3	2	1	5	4	0	0.810936	0.8	0
206431_x_at	TBC1D9B	248.729	247.183	260.466	162.805	205.176	0.879819	0.863989	1	0	0.433858	2	3	1	5	4	0	0.810859	0.5	0
218121_at	HMOX2	92.5423	87.3414	75.426	25.0009	78.0057	1	0.922997	0.746581	0	0.784775	1	2	4	5	3	5	0.810851	0.3	0
201159_s_at	NMT1	108.99	136.211	100.471	74.956	123.397	0.555612	1	0.416537	0	0.790809	3	1	4	5	2	5	0.810838	0.7	0
217848_s_at	PPA1	4694.68	9704.31	6477.07	4005.48	7994.08	0.120937	1	0.433701	0	0.699898	4	1	3	5	2	0	0.810821	0.9	0
215409_at	LPCAT4	3.15056	41.2425	31.8831	7.2363	35.5378	0	1	0.754294	0.10726	0.850239	5	1	3	4	2	0	0.810755	0.8	0
205300_s_at	SNRNP35	357.472	350.873	433.802	279.549	357.799	0.505164	0.462383	1	0	0.507283	3	4	1	5	2	2	0.810677	0.4	0
210559_s_at	CDC2	1356.19	1557.93	2590.23	385.326	2706.65	0.418237	0.505144	0.949848	0	1	4	3	2	5	1	1	0.810667	0.6	0
201004_at	SSR4	2832.92	4369.75	3108.31	2087.08	4222.53	0.32674	1	0.447384	0	0.935505	4	1	3	5	2	5	0.810515	0.9	0
220055_at	ZNF287	26.5989	21.3326	33.3248	1.11415	36.6764	0.716624	0.568537	0.905754	0	1	3	4	2	5	1	0	0.810483	0.3	0
204634_at	NEK4	546.566	543.253	513.209	394.155	575.074	0.842427	0.824115	0.658051	0	1	2	3	4	5	1	5	0.810405	0.2	0
218349_s_at	ZWILCH	620.381	643.604	969.141	409.229	794.537	0.377116	0.418593	1	0	0.688158	4	3	1	5	2	0	0.809989	0.7	0
209646_x_at	ALDH1B1	36.4008	100.592	69.9141	21.0323	40.1901	0.193169	1	0.614404	0	0.240798	4	1	2	5	3	5	0.809768	1	0
220384_at	TXNDC3	18.2883	27.3571	24.0191	15.1091	17.4767	0.259569	1	0.727466	0	0.193305	3	1	2	5	4	5	0.809583	0.9	0
209317_at	POLR1C	353.539	465.206	566.026	295.176	367.311	0.215481	0.627764	1	0	0.266328	4	2	1	5	3	0	0.809223	0.9	0
206097_at	SLC22A18AS	6.62438	224.048	260.209	16.6474	99.2491	0	0.857401	1	0.0395253	0.365262	5	2	1	4	3	0	0.808808	0.8	0
204147_s_at	TFDP1	159.17	194.441	318.975	90.6518	191.62	0.300093	0.454571	1	0	0.442216	4	2	1	5	3	4	0.808687	0.9	0
215388_s_at	CFHR1;CFH	24.8547	352.83	592.588	30.4283	333.863	0	0.577693	1	0.00981729	0.544284	5	2	1	4	3	0	0.808182	0.8	0
201087_at	PXN	322.229	618.226	350.071	123.349	302.059	0.401878	1	0.458138	0	0.36112	3	1	2	5	4	5	0.807991	0.9	0
221828_s_at	FAM125B	14.4835	69.3217	37.5519	1.43334	71.1486	0.187192	0.973795	0.518087	0	1	4	2	3	5	1	4	0.807871	0.7	0
204960_at	PTPRCAP	7.7424	34.5118	36.0879	1.8475	8.83657	0.172162	0.95397	1	0	0.204118	4	2	1	5	3	5	0.807853	0.9	0
216887_s_at	LDB3	38.729	40.9491	34.5321	14.4372	48.6926	0.709138	0.773948	0.58662	0	1	3	2	4	5	1	5	0.807358	0.5	0
210128_s_at	LTB4R	32.9963	142.201	156.896	38.6836	78.4769	0	0.881396	1	0.0459025	0.367076	5	2	1	4	3	0	0.807273	0.8	0
218171_at	VPS4B	661.31	703.755	590.959	449.35	680.882	0.83316	1	0.556628	0	0.910092	3	1	4	5	2	4	0.807143	0.7	0
206828_at	TXK	23.2201	53.9165	27.3501	9.5365	46.0278	0.308328	1	0.401388	0	0.822247	4	1	3	5	2	5	0.807126	0.9	0
206720_at	MGAT5	28.8551	45.8546	29.6902	20.0429	38.463	0.341403	1	0.373757	0	0.713634	4	1	3	5	2	5	0.806884	0.9	0
208975_s_at	KPNB1	1296.87	1670.99	2531.38	891.949	1556.57	0.246989	0.47519	1	0	0.405397	4	2	1	5	3	2	0.806871	0.9	0
202419_at	KDSR	417.645	1059.75	660.04	318.132	608.941	0.134184	1	0.46103	0	0.392128	4	1	2	5	3	5	0.806804	1	0
222276_at	222276_at	34.348	88.496	88.6932	26.8521	40.5529	0.121212	0.996811	1	0	0.221548	4	2	1	5	3	5	0.806663	0.9	0
204146_at	RAD51AP1	569.944	509.311	947.102	95.5259	507.053	0.557106	0.485905	1	0	0.483253	2	3	1	5	4	3	0.806641	0.5	0
209944_at	ZNF410	2226.6	3004.6	3082.04	2266.72	3221.18	0	0.78224	0.860102	0.0403386	1	5	3	2	4	1	5	0.806364	0.5	0
207046_at	HIST1H4C;HIST1H4B;HIST1H4A;HIST4H4;HIST1H4F;HIST1H4E;HIST1H4D;HIST1H4K;HIST1H4J;HIST1H4I;HIST1H4H;HIST1H4L;HIST2H4B;HIST2H4A	55.2416	107.175	56.9758	27.8052	74.6251	0.345678	1	0.367528	0	0.589896	4	1	3	5	2	5	0.806244	0.9	0
216754_at	216754_at	2.09628	11.3656	9.00608	1.52866	3.92639	0.0577029	1	0.760137	0	0.243748	4	1	2	5	3	5	0.806187	1	0
202599_s_at	NRIP1	610.232	1703.33	2077.39	138.346	513.654	0.24336	0.807091	1	0	0.193553	3	2	1	5	4	5	0.806134	0.8	0
222104_x_at	GTF2H3	920.11	944.044	814.403	573.698	951.485	0.916951	0.980304	0.637145	0	1	3	2	4	5	1	5	0.806083	0.5	0
218185_s_at	ARMC1	1056.58	1757.93	1205.51	839.558	1547.22	0.236312	1	0.398479	0	0.770561	4	1	3	5	2	5	0.80599	0.9	0
210525_x_at	C14orf143	20.4341	26.7571	18.5379	10.2126	27.5538	0.589434	0.954057	0.480088	0	1	3	2	4	5	1	0	0.805497	0.5	0
221676_s_at	CORO1C	2617.62	3536.98	3183.1	2470.15	3723.1	0.117698	0.851455	0.569017	0	1	4	2	3	5	1	4	0.805365	0.7	0
210410_s_at	C6orf26;MSH5	143.442	244.377	257.385	51.8473	373.012	0.285195	0.599473	0.639976	0	1	4	3	2	5	1	3	0.80519	0.6	0
201853_s_at	CDC25B	848.876	2483.62	2179.39	518.086	3200.46	0.12332	0.732759	0.619341	0	1	4	2	3	5	1	5	0.805185	0.7	0
216094_at	216094_at	80.0338	84.0436	64.1344	21.9517	91.4392	0.835864	0.893569	0.607055	0	1	3	2	4	5	1	5	0.805132	0.5	0
221069_s_at	CCDC44	300.865	765.608	702.264	294.216	417.009	0.014105	1	0.865624	0	0.26049	4	1	2	5	3	0	0.805086	1	0
203755_at	BUB1B	599.119	711.18	1206.25	146.428	1284.08	0.397917	0.496419	0.931587	0	1	4	3	2	5	1	0	0.804963	0.6	0
222250_s_at	INTS7	905.13	1018.38	781.03	426.831	740.479	0.808553	1	0.598765	0	0.530215	2	1	3	5	4	5	0.804952	0.7	0
205345_at	BARD1	531.679	632.892	426.337	174.482	641.768	0.764408	0.981005	0.538974	0	1	3	2	4	5	1	5	0.804677	0.5	0
202852_s_at	FLJ11506	752.196	763.95	819.327	430.91	1003.23	0.561375	0.581912	0.678671	0	1	4	3	2	5	1	5	0.804599	0.6	0
201528_at	RPA1	2347.56	2853.49	2710.5	1352.03	1722.29	0.663041	1	0.904766	0	0.2466	3	1	2	5	4	5	0.804561	0.9	0
218777_at	REEP4	104.323	324.296	288.082	122.196	194.495	0	1	0.835371	0.0812509	0.409923	5	1	2	4	3	5	0.804462	0.9	0
211163_s_at	TNFRSF10C	3.01239	31.2683	23.6332	5.22233	15.3608	0	1	0.729788	0.0782116	0.43702	5	1	2	4	3	0	0.804289	0.9	0
202633_at	TOPBP1	1129.65	1797.97	1689.68	1165.13	1366.68	0	1	0.837967	0.0530883	0.354665	5	1	2	4	3	4	0.804254	0.9	0
213511_s_at	MTMR1	1055.83	1438.33	860.304	438.384	1111.98	0.617479	1	0.421943	0	0.673632	3	1	4	5	2	5	0.804253	0.7	0
219526_at	C14orf169	268.676	452.15	531.83	260.618	551.673	0.0276855	0.658061	0.931824	0	1	4	3	2	5	1	2	0.804113	0.6	0
213092_x_at	DNAJC9	453.207	809.859	807.108	251.894	348.32	0.360799	1	0.99507	0	0.172817	3	1	2	5	4	4	0.804088	0.9	0
206337_at	CCR7	4.885	23.6823	34.7979	3.36404	35.2229	0.0477406	0.637759	0.98666	0	1	4	3	2	5	1	0	0.804053	0.6	0
221995_s_at	221995_s_at	102.795	171.428	160.564	72.9111	89.2223	0.303338	1	0.889725	0	0.165568	3	1	2	5	4	4	0.803826	0.9	0
201367_s_at	ZFP36L2	43.525	70.8641	41.0409	23.5523	56.4927	0.42215	1	0.369646	0	0.696241	3	1	4	5	2	5	0.803683	0.7	0
212563_at	BOP1	298.883	585.882	884.617	269.639	710.2	0.0475529	0.514235	1	0	0.716385	4	3	1	5	2	5	0.803328	0.7	0
203499_at	EPHA2	460.594	493.46	683.546	326.689	659.232	0.375234	0.467333	1	0	0.931866	4	3	1	5	2	0	0.803295	0.7	0
203103_s_at	PRPF19	670.693	1279.07	959.227	661.224	973.286	0.0153258	1	0.482326	0	0.505081	4	1	3	5	2	5	0.803196	0.9	0
212473_s_at	MICAL2	352.312	1783.03	1330.36	363.453	793.016	0	1	0.683606	0.007787	0.30803	5	1	2	4	3	5	0.802759	0.9	0
206598_at	INS	1.44328	3.54936	2.98425	1.68023	3.2526	0	1	0.731677	0.112508	0.859094	5	1	3	4	2	5	0.802561	0.8	0
1053_at	RFC2	372.487	761.75	394.868	187.487	534.266	0.322152	1	0.361125	0	0.603868	4	1	3	5	2	5	0.802501	0.9	0
207678_s_at	SOX30	1.56954	45.2079	27.1493	4.5128	29.4903	0	1	0.586176	0.0674466	0.639821	5	1	3	4	2	2	0.802392	0.8	0
221196_x_at	BRCC3	230.029	626.427	718.626	232.846	374.567	0	0.811298	1	0.00576549	0.295823	5	2	1	4	3	4	0.802373	0.8	0
204343_at	ABCA3	4.56994	351.79	209.32	4.69073	125.531	0	1	0.589684	0.000347877	0.34837	5	1	2	4	3	5	0.802104	0.9	0
210251_s_at	RUFY3	83.8237	78.3339	74.6378	37.7262	89.3389	0.893143	0.786777	0.715165	0	1	2	3	4	5	1	0	0.801834	0.2	0
221539_at	EIF4EBP1	1442.68	1997.5	1996.1	795.591	1028.47	0.538384	1	0.998835	0	0.193758	3	1	2	5	4	1	0.801679	0.9	0
218383_at	C14orf94	204.241	1081.78	810.668	297.778	916.244	0	1	0.691054	0.10659	0.811363	5	1	3	4	2	5	0.801354	0.8	0
216787_at	216787_at	2.31041	6.11739	10.186	1.32406	4.53186	0.111302	0.540889	1	0	0.361975	4	2	1	5	3	5	0.801249	0.9	0
204027_s_at	METTL1	113.765	413.663	295.055	137.975	305.503	0	1	0.604506	0.0807274	0.639344	5	1	3	4	2	0	0.800696	0.8	0
211239_s_at	ADAM7	1.14722	26.7128	26.3853	1.96804	9.22349	0	1	0.98719	0.0321064	0.315904	5	1	2	4	3	0	0.800591	0.9	0
205239_at	AREGB;AREG	79.993	896.179	806.391	51.0371	1154.29	0.0262459	0.766045	0.684661	0	1	4	2	3	5	1	3	0.800507	0.7	0
218985_at	SLC2A8	69.4409	133.505	92.7214	63.3715	105.75	0.0865407	1	0.418486	0	0.604255	4	1	3	5	2	1	0.800365	0.9	0
221520_s_at	CDCA8	430.687	515.866	531.505	53.4652	828.133	0.486947	0.596902	0.61709	0	1	4	3	2	5	1	5	0.800324	0.6	0
222158_s_at	FAM152A	569.851	632.592	628.456	262.402	384.465	0.830517	1	0.988827	0	0.329731	3	1	2	5	4	5	0.800221	0.9	0
202384_s_at	TCOF1	124.086	308.471	382.534	84.2793	149.735	0.133465	0.751679	1	0	0.219462	4	2	1	5	3	5	0.800173	0.9	0
211951_at	NOLC1	1422.49	3237.57	3283.43	1669.53	2372.22	0	0.975357	1	0.13275	0.51035	5	2	1	4	3	5	0.800143	0.8	0
203733_at	DEXI	273.392	435.943	418.678	194.297	232.641	0.327318	1	0.928553	0	0.158678	3	1	2	5	4	5	0.799964	0.9	0
206063_x_at	PPIL2	78.4637	136.298	122.272	76.0874	90.2861	0.0394665	1	0.767051	0	0.235817	4	1	2	5	3	5	0.799805	1	0
202458_at	PRSS23	3539.01	5443.32	4009.4	1264.59	2296.33	0.544285	1	0.656853	0	0.246903	3	1	2	5	4	5	0.799804	0.9	0
218369_s_at	EXOSC1	17.7378	40.9832	37.8435	16.0007	21.3278	0.0695327	1	0.874324	0	0.213233	4	1	2	5	3	5	0.799738	1	0
220855_at	220855_at	70.3359	63.5287	86.1611	33.4672	58.0514	0.699677	0.570493	1	0	0.466547	2	3	1	5	4	5	0.799449	0.5	0
204064_at	THOC1	736.412	786.901	722.056	659.435	712.806	0.603902	1	0.491276	0	0.418708	2	1	3	5	4	5	0.799398	0.7	0
217833_at	SYNCRIP	603.176	592.048	768.285	471.188	661.456	0.444259	0.406803	1	0	0.640424	3	4	1	5	2	5	0.79919	0.4	0
202473_x_at	HCFC1	10.1943	60.7214	72.3039	18.3343	45.2103	0	0.813515	1	0.131059	0.563778	5	2	1	4	3	5	0.798946	0.8	0
220301_at	CCDC102B	1.04086	15.7636	10.6653	2.5562	12.0943	0	1	0.653713	0.102925	0.750773	5	1	3	4	2	0	0.798922	0.8	0
212027_at	RBM25	408.228	998.234	555.122	279.973	656.366	0.178563	1	0.383077	0	0.524034	4	1	3	5	2	0	0.798872	0.9	0
216002_at	216002_at	5.1417	71.9223	40.9378	8.08217	45.1983	0	1	0.536025	0.0440318	0.599824	5	1	3	4	2	0	0.798696	0.8	0
207227_x_at	RFPL2	24.4947	25.6593	16.6335	1.20169	21.6007	0.952383	1	0.630961	0	0.834056	2	1	4	5	3	5	0.79865	0.6	0
220118_at	ZBTB32	2.51154	19.594	26.3707	3.12143	10.9381	0	0.715971	1	0.0255621	0.353179	5	2	1	4	3	0	0.79864	0.8	0
206432_at	HAS2	7.57889	132.139	115.108	22.6344	135.712	0	0.972115	0.839198	0.117499	1	5	2	3	4	1	0	0.798507	0.6	0
217455_s_at	SSTR2	22.7613	28.5177	23.6445	9.1321	36.7511	0.493472	0.701894	0.52545	0	1	4	2	3	5	1	5	0.79838	0.7	0
214043_at	PTPRD	3.05007	11.1593	6.59502	1.17313	3.72047	0.187954	1	0.54294	0	0.255087	4	1	2	5	3	2	0.798056	1	0
211300_s_at	TP53	57.909	395.984	237.021	68.4467	227.927	0	1	0.5298	0.0311697	0.5029	5	1	2	4	3	0	0.797673	0.9	0
207155_at	TBX5	21.1873	19.4008	21.1141	12.1387	17.6191	1	0.802566	0.99191	0	0.605663	1	3	2	5	4	0	0.797567	0.3	0
204091_at	PDE6D	599.773	631.747	820.943	487.298	635.806	0.33711	0.432942	1	0	0.445108	4	3	1	5	2	5	0.797533	0.7	0
212363_x_at	ACTG1	9546.54	14662.8	15583.8	9906.38	16332.9	0	0.753903	0.889617	0.053024	1	5	3	2	4	1	5	0.797498	0.5	0
213420_at	DHX57	169.586	297.21	372.626	181.682	325.403	0	0.628566	1	0.0595745	0.76742	5	3	1	4	2	5	0.797317	0.6	0
217997_at	PHLDA1	312.858	813.874	1062.29	89.5178	274.314	0.229591	0.744631	1	0	0.189969	3	2	1	5	4	2	0.797062	0.8	0
210316_at	FLT4	5.30448	25.5534	20.7601	6.50507	12.4582	0	1	0.763281	0.0592916	0.353289	5	1	2	4	3	5	0.796815	0.9	0
208660_at	CS	2879.22	5012.65	4423.02	2635.19	3107.44	0.102643	1	0.751992	0	0.198636	4	1	2	5	3	0	0.796583	1	0
204709_s_at	KIF23	481.253	528.163	1039.8	164.428	864.044	0.361932	0.41552	1	0	0.799221	4	3	1	5	2	5	0.79654	0.7	0
203421_at	TP53I11	30.8257	127.733	59.016	4.28812	46.3158	0.214975	1	0.443339	0	0.340457	4	1	2	5	3	5	0.79649	1	0
203219_s_at	APRT	551.251	1594.68	965.531	440.74	1405.29	0.0957684	1	0.454782	0	0.835875	4	1	3	5	2	5	0.796089	0.9	0
214879_x_at	USF2	127.187	140.422	187.417	86.7815	117.715	0.401503	0.533018	1	0	0.307382	3	2	1	5	4	5	0.795947	0.8	0
212721_at	SFRS12	1512.06	1278.05	1581.36	776.663	1426.18	0.913881	0.623076	1	0	0.807157	2	4	1	5	3	0	0.79576	0.3	0
210263_at	KCNF1	23.403	31.0968	50.2926	15.7078	44.3942	0.222502	0.444964	1	0	0.829451	4	3	1	5	2	2	0.7955	0.7	0
208736_at	ARPC3	4277.29	4070.93	5057.21	3253.84	4843.22	0.567521	0.453091	1	0	0.881339	3	4	1	5	2	5	0.795423	0.4	0
201897_s_at	CKS1B	3765.26	3945.68	6113.92	2015.72	6031.86	0.426904	0.470929	1	0	0.979977	4	3	1	5	2	5	0.795257	0.7	0
203305_at	F13A1	38.5744	67.983	37.0635	17.1607	39.825	0.421345	1	0.391615	0	0.445952	3	1	4	5	2	5	0.795138	0.7	0
207163_s_at	AKT1	323.565	796.334	522.929	268.544	751.117	0.104248	1	0.481981	0	0.914328	4	1	3	5	2	5	0.794808	0.9	0
218413_s_at	ZNF639	15.5717	43.4664	19.0152	2.7375	38.6934	0.315113	1	0.39966	0	0.88281	4	1	3	5	2	1	0.794759	0.9	0
221464_at	OR1D2	36.767	38.4022	34.9523	28.7767	40.5017	0.681475	0.820938	0.526704	0	1	3	2	4	5	1	5	0.794601	0.5	0
214178_s_at	SOX2	10.0782	22.3661	9.3521	1.71011	18.155	0.405117	1	0.369965	0	0.796132	3	1	4	5	2	2	0.794456	0.7	0
206664_at	SI	1.76543	3.34036	4.69582	0.641915	1.48124	0.277144	0.665641	1	0	0.207041	3	2	1	5	4	5	0.794413	0.8	0
204834_at	FGL2	5.79004	28.1321	23.2372	5.04328	33.7377	0.0260246	0.804645	0.634058	0	1	4	2	3	5	1	2	0.794317	0.7	0
211165_x_at	EPHB2	100.543	411.114	393.098	3.43179	66.8168	0.238203	1	0.955809	0	0.155477	3	1	2	5	4	1	0.794286	0.9	0
203414_at	MMD	1119.79	1901.6	2351.42	557.508	875.51	0.313439	0.749252	1	0	0.177267	3	2	1	5	4	5	0.794097	0.8	0
219222_at	RBKS	232.663	496.267	279.83	122.731	470.344	0.294301	1	0.420573	0	0.930601	4	1	3	5	2	5	0.794035	0.9	0
205397_x_at	SMAD3	265.034	378.584	255.134	87.986	181.456	0.609254	1	0.575186	0	0.321647	2	1	3	5	4	5	0.793987	0.7	0
218732_at	PTRH2	1007.38	1723.74	2849.1	456.755	1173.01	0.230161	0.5296	1	0	0.299395	4	2	1	5	3	3	0.793945	0.9	0
203564_at	FANCG;VCP	346.335	636.223	969.362	175.93	382.741	0.21477	0.580129	1	0	0.260654	4	2	1	5	3	5	0.79394	0.9	0
210307_s_at	KLHL25	54.6467	38.6495	71.3924	5.16962	56.418	0.747131	0.505564	1	0	0.773878	3	4	1	5	2	0	0.793882	0.4	0
205190_at	PLS1	181.658	1087.27	1412.54	327.825	1198.02	0	0.735742	1	0.11875	0.825718	5	3	1	4	2	3	0.793787	0.6	0
216228_s_at	WDHD1	152.32	147.296	112.009	4.23965	172.617	0.879455	0.849618	0.640047	0	1	2	3	4	5	1	0	0.793665	0.2	0
220602_s_at	LOC727751;LOC728125;FLJ22795;LOC727849;LOC388161;LOC729353;LOC388152;LOC727994	64.8305	66.3652	58.4392	35.9356	74.9363	0.740882	0.780232	0.577005	0	1	3	2	4	5	1	5	0.793633	0.5	0
201431_s_at	DPYSL3	59.8062	399.696	202.57	2.32245	116.89	0.144659	1	0.503928	0	0.288312	4	1	2	5	3	5	0.793513	1	0
205784_x_at	ARVCF	25.7234	74.3549	32.8614	5.62657	32.8033	0.29241	1	0.396268	0	0.395423	4	1	2	5	3	5	0.793316	1	0
208313_s_at	SF1	389.361	777.541	1077.22	302.676	512.968	0.111917	0.61309	1	0	0.271504	4	2	1	5	3	1	0.793087	0.9	0
203774_at	MTR	351.742	819.478	498.885	275.917	507.164	0.139497	1	0.410199	0	0.42543	4	1	3	5	2	5	0.793011	0.9	0
207614_s_at	CUL1	1177.06	1307.93	1080.64	643.227	924.811	0.803115	1	0.658058	0	0.423624	2	1	3	5	4	5	0.79294	0.7	0
222050_at	FXR2	25.1092	57.0377	81.1727	27.4443	61.8955	0	0.569506	1	0.041651	0.656154	5	3	1	4	2	5	0.7926	0.6	0
41113_at	ZNF500	111.308	125.535	102.102	55.0109	83.8714	0.798268	1	0.667731	0	0.409229	2	1	3	5	4	5	0.792457	0.7	0
205012_s_at	HAGH	253.054	400.213	350.966	229.214	446.447	0.109744	0.787169	0.560467	0	1	4	2	3	5	1	5	0.792245	0.7	0
205309_at	SMPDL3B	33.8393	132.681	49.7503	1.12157	62.3616	0.248692	1	0.369633	0	0.465493	4	1	3	5	2	5	0.792176	0.9	0
211120_x_at	ESR2	6.17193	14.1466	12.3968	0.953809	2.89493	0.395528	1	0.867367	0	0.147135	3	1	2	5	4	2	0.792146	0.9	0
200614_at	CLTC	8213.65	8457.9	11948.7	6074.24	10698.6	0.364188	0.405767	1	0	0.787197	4	3	1	5	2	5	0.791996	0.7	0
204354_at	POT1	458.609	581.716	515.689	265.081	334.091	0.611202	1	0.791473	0	0.217948	3	1	2	5	4	5	0.791772	0.9	0
213483_at	PPWD1	686.763	577.779	612.638	195.043	544.408	1	0.778362	0.849254	0	0.710496	1	3	2	5	4	5	0.791464	0.3	0
209247_s_at	ABCF2	394.936	702.269	663.344	348.468	853.044	0.0920932	0.701185	0.624041	0	1	4	2	3	5	1	0	0.791152	0.7	0
207468_s_at	SFRP5	7.27902	20.6665	17.806	2.32686	4.93489	0.270025	1	0.844026	0	0.142207	3	1	2	5	4	5	0.790974	0.9	0
202029_x_at	RPL38	12376.3	12744.1	15359.2	10624.6	12500.7	0.369978	0.447662	1	0	0.396253	4	2	1	5	3	5	0.790899	0.9	0
201219_at	CTBP2	623.765	657.296	604.478	249.82	417.83	0.91771	1	0.870378	0	0.412319	2	1	3	5	4	5	0.790741	0.7	0
205238_at	TRMT2B	304.256	476	491.667	256.499	609.704	0.13521	0.621455	0.665812	0	1	4	3	2	5	1	4	0.790721	0.6	0
205035_at	CTDP1	83.357	149.526	111.794	79.249	106.488	0.0584544	1	0.463096	0	0.387595	4	1	2	5	3	5	0.790683	1	0
204495_s_at	C15orf39	102.258	168.404	175.642	92.8726	107.904	0.113392	0.912552	1	0	0.181606	4	2	1	5	3	5	0.790637	0.9	0
201225_s_at	SRRM1	2115.3	2319.28	2304.9	1766.42	1878.64	0.631046	1	0.97399	0	0.202981	3	1	2	5	4	5	0.790521	0.9	0
211438_at	TRHR	3.17376	3.03663	5.75866	0.903244	5.33147	0.467625	0.439383	1	0	0.912018	3	4	1	5	2	5	0.79049	0.4	0
200939_s_at	RERE	42.8642	35.4451	45.0363	18.3552	36.7228	0.91859	0.640525	1	0	0.688412	2	4	1	5	3	5	0.790443	0.3	0
204573_at	CROT	351.301	905.4	472.813	118.914	359.985	0.295475	1	0.449975	0	0.306517	4	1	2	5	3	5	0.790434	1	0
209503_s_at	PSMC5	2549.66	3274.65	3997.77	2529.55	3589.95	0.0136969	0.507485	1	0	0.722235	4	3	1	5	2	3	0.790307	0.7	0
215903_s_at	MAST2	308.738	542.302	422.484	210.356	269.797	0.29638	1	0.639044	0	0.179068	3	1	2	5	4	5	0.790245	0.9	0
218212_s_at	MOCS2	505.21	497.906	550.911	336.232	637.123	0.561592	0.537318	0.713478	0	1	3	4	2	5	1	4	0.790197	0.3	0
204366_s_at	GTF3C2	1409.11	2199.35	2702.93	1373.13	1787.35	0.0270567	0.621311	1	0	0.31149	4	2	1	5	3	5	0.789923	0.9	0
65588_at	LOC388796	201.53	815.752	1112.86	289.588	937.694	0	0.673984	1	0.0966258	0.807791	5	3	1	4	2	5	0.789496	0.6	0
208637_x_at	ACTN1	1973.49	5344.75	2866.51	1377.39	4068.79	0.150251	1	0.375343	0	0.678386	4	1	3	5	2	1	0.78949	0.9	0
203426_s_at	IGFBP5	8.38736	18.6029	16.1587	2.49274	4.75001	0.365895	1	0.848282	0	0.140115	3	1	2	5	4	5	0.789437	0.9	0
213076_at	ITPKC	60.4158	82.0819	82.8824	58.3969	93.854	0.0569392	0.66799	0.690567	0	1	4	3	2	5	1	3	0.788947	0.6	0
40016_g_at	LOC100128443;MAST4	36.4936	211.322	178.951	14.2417	47.4536	0.112908	1	0.835747	0	0.16852	4	1	2	5	3	5	0.788819	1	0
213084_x_at	hCG_16001;RPL23A	26799.3	27375.5	28846.5	24425.2	30351.4	0.400611	0.49784	0.74606	0	1	4	3	2	5	1	5	0.788729	0.6	0
222214_at	222214_at	140.8	263.197	319.837	139.861	190.995	0.00521736	0.685291	1	0	0.284116	4	2	1	5	3	5	0.788553	0.9	0
215644_at	ZNF518A	8.43736	22.7469	28.4426	1.60064	39.3053	0.181323	0.560839	0.7119	0	1	4	3	2	5	1	0	0.788523	0.6	0
203276_at	LMNB1	1058.53	989.138	1056.68	114.99	570.299	1	0.926456	0.998039	0	0.482554	1	3	2	5	4	5	0.788521	0.3	0
213715_s_at	KANK3	2.623	31.7918	21.338	3.40608	32.5521	0	0.974597	0.625311	0.0261645	1	5	2	3	4	1	5	0.78848	0.6	0
208202_s_at	PHF15	49.6134	81.1411	73.8102	32.7659	39.395	0.348267	1	0.848457	0	0.137035	3	1	2	5	4	5	0.788454	0.9	0
213379_at	COQ2	479.497	1089.08	691.661	290.204	492.473	0.236949	1	0.502527	0	0.253192	4	1	2	5	3	5	0.788372	1	0
203332_s_at	INPP5D	4.88958	31.2467	42.8159	1.92468	11.2021	0.072507	0.717074	1	0	0.22688	4	2	1	5	3	5	0.788297	0.9	0
205561_at	KCTD17	5.36921	38.7048	52.7891	10.2769	46.3262	0	0.702988	1	0.103494	0.863709	5	3	1	4	2	2	0.788218	0.6	0
220796_x_at	SLC35E1	342.471	558.411	559.982	369.084	436.501	0	0.992777	1	0.122352	0.4323	5	2	1	4	3	3	0.788014	0.8	0
201012_at	ANXA1	10249	11625.1	11609	5322.2	7039.81	0.781672	1	0.997446	0	0.272511	3	1	2	5	4	5	0.787853	0.9	0
221804_s_at	FAM45A;FAM45B	1442.03	2371.95	2679.69	1607.35	2139.95	0	0.751353	1	0.133575	0.563903	5	2	1	4	3	5	0.787694	0.8	0
217369_at	IGHG1;LOC100132941	1.54602	6.12179	11.3318	1.16974	6.13462	0.0370279	0.487308	1	0	0.48857	4	3	1	5	2	4	0.787608	0.7	0
216539_at	ATXN3L	1.49454	23.5042	12.713	1.68741	20.0473	0	1	0.509706	0.00876297	0.842937	5	1	3	4	2	0	0.787507	0.8	0
221250_s_at	MXD3	63.7376	110.588	60.8125	35.0556	79.4491	0.379731	1	0.341005	0	0.587741	3	1	4	5	2	0	0.787458	0.7	0
211460_at	TTTY9A;TTTY9B	2.1676	21.6284	14.1008	1.27386	23.9602	0.0393955	0.897216	0.565404	0	1	4	2	3	5	1	5	0.787347	0.7	0
204776_at	THBS4	4.00839	30.8877	19.7395	2.72609	9.7933	0.0455336	1	0.604135	0	0.250952	4	1	2	5	3	5	0.787304	1	0
202753_at	PSMD6	3726.52	3638.94	3817.05	3214.45	3997.14	0.654244	0.542348	0.769909	0	1	3	4	2	5	1	5	0.787155	0.3	0
210280_at	MPZ	35.252	38.6103	35.3192	14.064	22.7678	0.863185	1	0.865923	0	0.354587	3	1	2	5	4	5	0.787021	0.9	0
201082_s_at	DCTN1	468.836	649.53	599.278	327.837	374.692	0.438303	1	0.843789	0	0.145651	3	1	2	5	4	5	0.786921	0.9	0
201477_s_at	RRM1	707.186	1910.53	2928.1	745.851	2420.12	0	0.541824	1	0.0174095	0.771274	5	3	1	4	2	5	0.786702	0.6	0
203893_at	TAF9	1215.85	1436.04	1876.64	991.521	1899.37	0.247099	0.48964	0.974963	0	1	4	3	2	5	1	4	0.786501	0.6	0
217409_at	MYO5A	1.70032	1.69323	2.70744	1.00776	1.85774	0.407465	0.403294	1	0	0.500082	3	4	1	5	2	0	0.786392	0.4	0
217911_s_at	BAG3	1841.3	2531.23	1473.43	791.416	2112.64	0.603446	1	0.392004	0	0.759405	3	1	4	5	2	2	0.786335	0.7	0
208676_s_at	PA2G4	699.912	3353.33	1970.54	575.809	1484.98	0.0446812	1	0.50215	0	0.327332	4	1	2	5	3	5	0.786002	1	0
37953_s_at	ACCN2	47.5055	65.0951	38.2265	18.8973	60.1973	0.619255	1	0.418401	0	0.893982	3	1	4	5	2	5	0.785546	0.7	0
204835_at	POLA1	259.909	397.376	787.936	120.092	430.055	0.209356	0.415193	1	0	0.464125	4	3	1	5	2	3	0.785125	0.7	0
212444_at	212444_at	961.23	2319.2	2111.07	830.556	1079.45	0.0877806	1	0.860188	0	0.167195	4	1	2	5	3	5	0.784682	1	0
202694_at	STK17A	20.9331	81.3278	68.8517	32.1377	66.2821	0	1	0.793424	0.185523	0.750877	5	1	2	4	3	5	0.784643	0.9	0
221715_at	221715_at	30.7568	37.9635	28.2058	17.1971	25.0287	0.652963	1	0.530121	0	0.377128	2	1	3	5	4	1	0.784296	0.7	0
213459_at	RPL37A	207.926	269.808	229.315	198.341	223.056	0.134118	1	0.433403	0	0.345824	4	1	2	5	3	5	0.784079	1	0
218757_s_at	UPF3B	379.941	621.961	891.203	368.437	631.087	0.022006	0.484967	1	0	0.502424	4	3	1	5	2	0	0.783996	0.7	0
219405_at	TRIM68	97.287	268.834	308.062	134.11	269.008	0	0.813887	1	0.174703	0.814712	5	3	1	4	2	1	0.783896	0.6	0
200854_at	NCOR1	631.11	1113.81	1433.19	550.051	762.913	0.0917851	0.638358	1	0	0.241029	4	2	1	5	3	5	0.783799	0.9	0
218883_s_at	MLF1IP	2197.36	1542.17	2224.42	208.798	2080.01	0.986575	0.661519	1	0	0.928355	2	4	1	5	3	1	0.783568	0.3	0
214721_x_at	CDC42EP4	270.737	374.891	430.849	119.006	170.815	0.486562	0.820557	1	0	0.166138	3	2	1	5	4	1	0.783505	0.8	0
207207_at	RBMXL2	1.84493	1.66698	1.8624	1.30981	1.82447	0.968385	0.646356	1	0	0.93136	2	4	1	5	3	0	0.783436	0.3	0
217932_at	MRPS7	1376.39	1301.79	1590.44	954.416	1220.82	0.663456	0.546165	1	0	0.418858	2	3	1	5	4	0	0.783369	0.5	0
221524_s_at	RRAGD	91.507	128.801	126.199	23.9906	44.4365	0.644177	1	0.975174	0	0.195075	3	1	2	5	4	0	0.78336	0.9	0
214358_at	ACACA	79.3439	140.597	199.262	80.3386	166.489	0	0.510791	1	0.00829483	0.726705	5	3	1	4	2	0	0.783301	0.6	0
212726_at	PHF2	287.186	386.477	414.646	159.361	199.565	0.500715	0.889657	1	0	0.157487	3	2	1	5	4	0	0.783158	0.8	0
212480_at	SPECC1L	363.332	707.772	385.225	208.116	606.072	0.310646	1	0.354462	0	0.79646	4	1	3	5	2	2	0.783133	0.9	0
222336_at	C4orf34	35.7675	57.3333	31.6245	16.9941	37.5768	0.465389	1	0.362684	0	0.510241	3	1	4	5	2	5	0.783098	0.7	0
201153_s_at	MBNL1	1323.18	2736.29	2669.64	1560.64	2046.97	0	1	0.952835	0.168041	0.512197	5	1	2	4	3	5	0.783045	0.9	0
214378_at	TFPI	37.2678	92.3168	35.4644	3.51671	44.0976	0.380079	1	0.359771	0	0.456992	3	1	4	5	2	0	0.782755	0.7	0
219111_s_at	DDX54	95.4748	146.833	160.18	84.1581	96.2914	0.148861	0.824432	1	0	0.159603	4	2	1	5	3	3	0.782711	0.9	0
211028_s_at	KHK	4.71896	73.1311	112.684	9.3056	106.562	0	0.633651	1	0.0424826	0.943296	5	3	1	4	2	5	0.78263	0.6	0
218741_at	CENPM	285.146	381.882	267.006	86.3664	470.362	0.517661	0.769581	0.470421	0	1	3	2	4	5	1	5	0.782609	0.5	0
205426_s_at	HIP1	41.5144	114.018	41.6631	3.8487	87.3706	0.341889	1	0.343239	0	0.758123	4	1	3	5	2	5	0.782435	0.9	0
212973_at	RPIA	482.256	437.044	477.418	284.367	402.21	1	0.771528	0.975552	0	0.595501	1	3	2	5	4	3	0.782036	0.3	0
208893_s_at	DUSP6	41.4094	315.428	163.153	30.4048	134.008	0.0386095	1	0.465745	0	0.36349	4	1	2	5	3	5	0.781743	1	0
210378_s_at	SSNA1	286.771	349.303	310.899	239.628	259.135	0.429843	1	0.649838	0	0.177862	3	1	2	5	4	3	0.781703	0.9	0
200743_s_at	TPP1	339.1	3208.79	1846.21	536.798	2259.98	0	1	0.525182	0.0688918	0.669368	5	1	3	4	2	5	0.781194	0.8	0
219735_s_at	TFCP2L1	13.2396	42.2539	31.1952	2.05907	7.5572	0.278158	1	0.724873	0	0.136787	3	1	2	5	4	0	0.78087	0.9	0
205085_at	ORC1L	105.673	151.752	230.41	77.7676	225.391	0.182816	0.484691	1	0	0.967119	4	3	1	5	2	5	0.780809	0.7	0
211213_at	ORC5L	38.4369	36.2984	42.5674	16.7063	26.7632	0.840281	0.75759	1	0	0.388881	2	3	1	5	4	5	0.780523	0.5	0
207516_at	CHRNB4	9.80077	12.0264	7.25043	1.40948	6.72328	0.79037	1	0.550155	0	0.500503	2	1	3	5	4	5	0.780418	0.7	0
202589_at	TYMS	3424.93	3088.59	5688.47	1055.21	5430.75	0.511458	0.438866	1	0	0.944376	3	4	1	5	2	5	0.780357	0.4	0
213851_at	TMEM110	171.033	143.396	156.048	49.0244	189.415	0.869065	0.672207	0.762327	0	1	2	4	3	5	1	2	0.780343	0.1	0
207130_at	ZMYND8	41.1629	131.304	92.1062	49.843	99.7473	0	1	0.565151	0.0962946	0.649919	5	1	3	4	2	0	0.780257	0.8	0
201890_at	RRM2	3542.87	3801.94	5075.83	302.71	7181.65	0.471026	0.508687	0.693874	0	1	4	3	2	5	1	5	0.780154	0.6	0
213911_s_at	H2AFZ	6189.15	6141.14	7194.5	5409.29	6970.03	0.436845	0.409952	1	0	0.874261	3	4	1	5	2	0	0.779909	0.4	0
203617_x_at	ELK1	187.458	304.804	299.831	167.019	186.546	0.14834	1	0.963908	0	0.141721	3	1	2	5	4	5	0.779829	0.9	0
203458_at	SPR	565.766	492.651	766.546	217.961	796.283	0.601404	0.474978	0.948581	0	1	3	4	2	5	1	1	0.77973	0.3	0
215008_at	TLL2	4.71953	46.061	27.0113	3.42305	14.9348	0.0304067	1	0.553222	0	0.269988	4	1	2	5	3	5	0.779556	1	0
203611_at	TERF2	693.056	751.544	937.444	528.598	1010.23	0.34146	0.462897	0.848876	0	1	4	3	2	5	1	4	0.779308	0.6	0
204921_at	GAS8	77.0551	202.739	160.854	93.4017	183.498	0	1	0.666743	0.130061	0.84691	5	1	3	4	2	5	0.779196	0.8	0
209251_x_at	TUBA1C	12468.6	14341	13380.1	11498.7	11933.9	0.341238	1	0.661929	0	0.153115	3	1	2	5	4	5	0.779109	0.9	0
213276_at	CAMK2B	8.92419	20.7839	13.4655	1.99605	5.29138	0.368756	1	0.610472	0	0.175397	3	1	2	5	4	5	0.778448	0.9	0
206857_s_at	FKBP1B	119.049	339.818	303.844	159.863	242.929	0	1	0.837051	0.184872	0.56113	5	1	2	4	3	3	0.777712	0.9	0
208025_s_at	HMGA2	26.0457	850.157	1498.33	76.8674	674.704	0	0.55975	1	0.0345189	0.44058	5	2	1	4	3	5	0.777372	0.8	0
201292_at	TOP2A	850.891	1507.03	2723.86	337.245	2762.54	0.211787	0.482327	0.984051	0	1	4	3	2	5	1	4	0.777179	0.6	0
218301_at	RNPEPL1	64.4871	57.8668	74.7924	36.3598	53.9773	0.73186	0.559603	1	0	0.4584	2	3	1	5	4	5	0.77713	0.5	0
203216_s_at	MYO6	486.465	1096.07	456.764	15.8696	407.351	0.435656	1	0.40816	0	0.362416	2	1	3	5	4	5	0.777054	0.7	0
205469_s_at	IRF5	59.4174	156.797	60.2451	7.60824	72.9765	0.347273	1	0.352821	0	0.438158	4	1	3	5	2	5	0.776949	0.9	0
200000_s_at	PRPF8	2213.89	3750.95	4164	2096.78	2474.32	0.056651	0.800191	1	0	0.182632	4	2	1	5	3	5	0.776936	0.9	0
219202_at	RHBDF2	154.427	198.246	235.744	63.9185	94.2154	0.526747	0.781767	1	0	0.176324	3	2	1	5	4	5	0.776912	0.8	0
220676_at	ADAMTS8	4.78681	11.8685	21.5691	2.66875	20.1346	0.112065	0.48675	1	0	0.924102	4	3	1	5	2	5	0.776879	0.7	0
218039_at	NUSAP1	2177.39	1707.92	2184.85	534.157	2488.93	0.840626	0.60046	0.844442	0	1	3	4	2	5	1	0	0.776817	0.3	0
212456_at	KIAA0664	346.621	836.192	734.631	184.667	259.928	0.248577	1	0.844118	0	0.115515	3	1	2	5	4	0	0.776805	0.9	0
212298_at	NRP1	240.361	1780.11	2290.49	145.737	2875.08	0.0346691	0.598816	0.785813	0	1	4	3	2	5	1	5	0.77678	0.6	0
215741_x_at	AKAP8L	34.6512	60.3164	42.3773	11.1801	20.4782	0.477673	1	0.634911	0	0.189231	3	1	2	5	4	0	0.776635	0.9	0
207056_s_at	SLC4A8	33.0244	81.4499	32.4114	7.52297	43.6993	0.344955	1	0.336663	0	0.489353	3	1	4	5	2	5	0.776482	0.7	0
216632_at	NAV3	5.21641	14.7982	17.4831	1.7181	3.79243	0.221904	0.829692	1	0	0.131578	3	2	1	5	4	5	0.776474	0.8	0
207503_at	TCP10	45.2904	53.4812	28.6911	4.08589	42.1197	0.834179	1	0.498128	0	0.769988	2	1	4	5	3	5	0.776158	0.6	0
215460_x_at	BRD1	293.179	371.518	296.809	204.025	247.048	0.532285	1	0.553957	0	0.256864	3	1	2	5	4	2	0.776126	0.9	0
216918_s_at	DST	26.016	155.088	64.4909	11.9564	86.524	0.0982285	1	0.367036	0	0.520972	4	1	3	5	2	5	0.776067	0.9	0
206350_at	APCS	12.4983	26.0249	12.1299	2.23497	10.4519	0.431415	1	0.415929	0	0.345395	2	1	3	5	4	5	0.77583	0.7	0
212071_s_at	SPTBN1	5990.54	6988.85	8775.26	5603.04	6945.2	0.122154	0.436858	1	0	0.423098	4	2	1	5	3	3	0.775724	0.9	0
209718_at	NCAPH2	55.0976	146.277	72.9415	16.6918	53.8995	0.296375	1	0.434075	0	0.287129	3	1	2	5	4	1	0.77568	0.9	0
213333_at	MDH2	296.12	446.192	354.042	217.827	257.273	0.342842	1	0.596479	0	0.172732	3	1	2	5	4	5	0.775655	0.9	0
212738_at	ARHGAP19	70.9903	336.982	217.694	86.3819	302.251	0	1	0.551535	0.057865	0.869428	5	1	3	4	2	0	0.775523	0.8	0
204728_s_at	WDHD1	163.23	137.92	226.511	62.5333	221.788	0.614088	0.459738	1	0	0.971197	3	4	1	5	2	2	0.775447	0.4	0
214873_at	LRP5L	44.2925	41.336	105.266	1.83734	83.4595	0.410478	0.381893	1	0	0.789164	3	4	1	5	2	0	0.775316	0.4	0
212961_x_at	CXorf40A;CXorf40B	788.323	1086.1	697.212	492.829	929.644	0.498076	1	0.344502	0	0.736282	3	1	4	5	2	0	0.775193	0.7	0
210120_s_at	RANBP3	56.9795	124.918	116.667	61.6394	142.902	0	0.790695	0.694667	0.0542338	1	5	2	3	4	1	0	0.775052	0.6	0
218632_at	HECTD3	243.254	535.475	357.816	177.819	259.778	0.182955	1	0.503269	0	0.229156	4	1	2	5	3	0	0.774972	1	0
40465_at	DDX23	254.021	352.381	560.405	204.759	370.138	0.138514	0.415081	1	0	0.46501	4	3	1	5	2	5	0.774939	0.7	0
214481_at	HIST1H2AM	72.2204	108.384	60.1204	29.303	66.6171	0.542702	1	0.389694	0	0.471847	2	1	4	5	3	0	0.774862	0.6	0
207553_at	OPRK1	5.56308	29.0288	25.213	7.09243	12.0999	0	1	0.837388	0.0651738	0.278569	5	1	2	4	3	0	0.774365	0.9	0
216261_at	ITGB3	25.0945	42.6049	29.8521	17.4808	46.1841	0.265255	0.875304	0.431006	0	1	4	2	3	5	1	0	0.774364	0.7	0
212031_at	RBM25	939.014	1330.92	1171.7	765.67	1574.45	0.214328	0.698892	0.502028	0	1	4	2	3	5	1	5	0.774348	0.7	0
202642_s_at	TRRAP	391.478	1131.33	971.753	423.444	575.983	0	1	0.784312	0.0432059	0.249381	5	1	2	4	3	5	0.774001	0.9	0
212701_at	TLN2	40.4324	45.9938	60.2989	23.4844	71.5392	0.352681	0.468411	0.766094	0	1	4	3	2	5	1	5	0.773879	0.6	0
216935_at	C1orf46	5.13892	4.29286	5.7352	1.50552	6.82269	0.683333	0.524215	0.795476	0	1	3	4	2	5	1	5	0.773698	0.3	0
200989_at	HIF1A	5462.24	7698.13	9750.54	5618.41	7693.55	0	0.521393	1	0.0364177	0.520325	5	2	1	4	3	5	0.773571	0.8	0
205068_s_at	ARHGAP26	253.028	460.064	198.869	26.5755	443.199	0.522396	1	0.397458	0	0.961095	3	1	4	5	2	5	0.773463	0.7	0
201440_at	DDX23	373.49	394.237	708.097	178.696	399.226	0.367952	0.407141	1	0	0.416565	4	3	1	5	2	0	0.773399	0.7	0
201338_x_at	GTF3A	2184.75	2564.3	3681.88	1654.41	2330.73	0.261577	0.448781	1	0	0.333578	4	2	1	5	3	5	0.773319	0.9	0
210677_at	SOAT2	3.62279	18.0817	19.4303	7.04483	14.0179	0	0.914686	1	0.216482	0.657606	5	2	1	4	3	3	0.773245	0.8	0
218786_at	NT5DC3	55.5915	92.2818	113.78	46.8756	58.9282	0.130274	0.678673	1	0	0.180147	4	2	1	5	3	0	0.772572	0.9	0
203160_s_at	RNF8	221.758	405.36	384.319	219.55	479.861	0.00848216	0.7138	0.63297	0	1	4	2	3	5	1	3	0.772463	0.7	0
221607_x_at	ACTG1	12958.5	18731.1	20952.9	14040.2	20199.9	0	0.72208	1	0.135307	0.905809	5	3	1	4	2	0	0.772463	0.6	0
216548_x_at	HMG4L	150.982	357.193	362.247	197.916	358.144	0	0.976077	1	0.222157	0.980579	5	3	1	4	2	1	0.772463	0.6	0
206066_s_at	RAD51C	325.339	318.874	558.86	151.975	326.796	0.426076	0.410187	1	0	0.429657	3	4	1	5	2	2	0.772316	0.4	0
220296_at	GALNT10	89.7329	142.507	76.485	40.2474	125.931	0.48392	1	0.354369	0	0.837903	3	1	4	5	2	5	0.772312	0.7	0
202674_s_at	LMO7	1.20519	41.273	27.9238	6.60755	20.9845	0	1	0.666835	0.13483	0.493646	5	1	2	4	3	4	0.772294	0.9	0
218153_at	CARS2	164.924	637.984	423.836	163.554	291.581	0.00288768	1	0.54862	0	0.269854	4	1	2	5	3	5	0.772133	1	0
212023_s_at	MKI67	245.479	170.603	372.683	22.7648	262.379	0.636475	0.422494	1	0	0.684772	3	4	1	5	2	0	0.772026	0.4	0
211345_x_at	EEF1G	9217.18	11419.3	9274.21	8284.33	10085.8	0.297563	1	0.315754	0	0.574637	4	1	3	5	2	0	0.77187	0.9	0
211342_x_at	MED12	93.4574	336.068	214.466	110.22	236.119	0	1	0.498777	0.0690926	0.588027	5	1	3	4	2	0	0.771753	0.8	0
201286_at	SDC1	1405.6	1682.34	1508.31	174.469	599.601	0.81647	1	0.884586	0	0.281942	3	1	2	5	4	5	0.771732	0.9	0
200095_x_at	RPS10	14843.1	19321	18191.9	15583.6	18976.5	0	1	0.747851	0.165368	0.923067	5	1	3	4	2	3	0.771653	0.8	0
217704_x_at	SUZ12P	182.819	458.207	461.801	160.231	204.835	0.0749014	0.988082	1	0	0.147906	4	2	1	5	3	2	0.771442	0.9	0
201830_s_at	NET1	458.929	1325.46	1396.83	373.495	521.475	0.0834859	0.930257	1	0	0.144606	4	2	1	5	3	5	0.771437	0.9	0
215941_at	215941_at	3.32148	36.3524	19.5988	3.2101	34.0597	0.00336066	1	0.494495	0	0.930823	4	1	3	5	2	5	0.771384	0.9	0
221509_at	DENR	2666.98	2505.24	3094.45	1962.86	2469.43	0.62224	0.479308	1	0	0.447662	2	3	1	5	4	1	0.771358	0.5	0
206324_s_at	DAPK2	32.3394	23.7418	43.2476	8.22853	34.9454	0.688507	0.442995	1	0	0.762923	3	4	1	5	2	0	0.771164	0.4	0
201345_s_at	UBE2D2	1767.88	2492.19	1944.73	1541.35	2497.57	0.236902	0.994374	0.421849	0	1	4	2	3	5	1	2	0.771076	0.7	0
218167_at	AMZ2	1632.09	1897.49	2129.78	1610.18	1763.54	0.0421671	0.552945	1	0	0.29515	4	2	1	5	3	5	0.771057	0.9	0
214938_x_at	HMGB1	8441.75	10399.4	11239.1	8027.38	8530.12	0.129018	0.738551	1	0	0.156533	4	2	1	5	3	0	0.770862	0.9	0
205126_at	VRK2	1265.22	1218.17	1258.48	1090.27	1302.85	0.822984	0.601656	0.791279	0	1	2	4	3	5	1	5	0.770861	0.1	0
202771_at	FAM38A	600.1	1572.41	923.354	522.11	1301.91	0.074255	1	0.382028	0	0.742455	4	1	3	5	2	5	0.770792	0.9	0
AFFX-HSAC07/X00351_3_at	ACTB	15058.1	18480.9	16334.5	14919.8	16533.8	0.0388363	1	0.397265	0	0.453231	4	1	3	5	2	3	0.770754	0.9	0
214742_at	AZI1	99.6625	137.583	104.921	47.4742	173.023	0.415681	0.717719	0.457566	0	1	4	2	3	5	1	0	0.770647	0.7	0
210842_at	NRP2	4.28952	22.681	21.5839	1.39417	3.99237	0.136016	1	0.948461	0	0.122057	3	1	2	5	4	2	0.770591	0.9	0
205515_at	PRSS12	34.1487	24.0476	49.7034	1.96521	28.4137	0.674167	0.462573	1	0	0.554032	2	4	1	5	3	0	0.770543	0.3	0
204352_at	TRAF5	81.0432	396.599	436.775	142.708	256.68	0	0.887061	1	0.173346	0.493734	5	2	1	4	3	5	0.770512	0.8	0
221229_s_at	FLJ20628	735.98	957.851	1252.22	713.025	954.977	0.0425727	0.454058	1	0	0.448728	4	2	1	5	3	0	0.770469	0.9	0
210226_at	NR4A1	40.6279	47.0387	38.3768	15.962	26.019	0.79371	1	0.721273	0	0.323619	2	1	3	5	4	1	0.77043	0.7	0
221633_at	NCAPH2	45.6006	39.6649	38.1808	1.11089	25.1162	1	0.866583	0.833224	0	0.53957	1	2	3	5	4	5	0.770174	0.4	0
208126_s_at	CYP2C18	5.44915	28.6013	19.3537	2.37494	6.52614	0.117218	1	0.647393	0	0.158283	4	1	2	5	3	5	0.770034	1	0
215140_at	LOC100128570	2.09897	28.4215	44.5177	4.47216	42.6628	0	0.62054	1	0.0559467	0.956272	5	3	1	4	2	1	0.769966	0.6	0
213054_at	KIAA0841	134.246	183.023	147.31	69.8327	234.56	0.39103	0.687137	0.470337	0	1	4	2	3	5	1	5	0.769951	0.7	0
217776_at	RDH11	2504.2	3489.38	4376.79	2597.48	3525.81	0	0.526106	1	0.0498134	0.54556	5	3	1	4	2	5	0.769924	0.6	0
205939_at	CYP3A7	11.5314	27.7327	17.6816	8.41269	29.0083	0.151426	0.938064	0.450043	0	1	4	2	3	5	1	1	0.769819	0.7	0
211983_x_at	ACTG1	11074.8	16284.3	18796.3	12085.6	17499.9	0	0.674675	1	0.130907	0.832105	5	3	1	4	2	5	0.769748	0.6	0
208688_x_at	EIF3B	3162.27	4911.58	3246.74	1391.83	2271.8	0.503002	1	0.527	0	0.250009	3	1	2	5	4	5	0.769676	0.9	0
218944_at	PYCRL	136.435	144.384	120.02	48.7817	184.271	0.646939	0.705608	0.525785	0	1	3	2	4	5	1	5	0.769474	0.5	0
210422_x_at	SLC11A1	7.70503	24.6702	26.2227	4.81448	7.47394	0.135021	0.927481	1	0	0.124226	3	2	1	5	4	3	0.769387	0.8	0
205069_s_at	ARHGAP26	53.0409	117.316	73.5103	3.09868	159.128	0.320082	0.732025	0.451272	0	1	4	2	3	5	1	0	0.769237	0.7	0
215940_at	215940_at	4.32416	13.0081	10.5527	1.70486	2.91228	0.23173	1	0.78277	0	0.106821	3	1	2	5	4	5	0.769152	0.9	0
208325_s_at	AKAP13	88.4926	133.08	184.216	89.4668	144.627	0	0.465794	1	0.0101772	0.586423	5	3	1	4	2	5	0.769112	0.6	0
219098_at	MYBBP1A	120.462	348.97	341.132	134.564	179.569	0	1	0.965699	0.0617134	0.258665	5	1	2	4	3	2	0.769051	0.9	0
201026_at	EIF5B	308.733	382.526	471.88	301.98	444.729	0.0397469	0.474079	1	0	0.840194	4	3	1	5	2	2	0.769035	0.7	0
212838_at	DNMBP	627.472	1848.02	925.706	305.542	1771.84	0.20871	1	0.402057	0	0.950612	4	1	3	5	2	5	0.768969	0.9	0
218161_s_at	CLN6	51.68	94.9662	132.873	45.6486	68.3354	0.0691481	0.565411	1	0	0.260097	4	2	1	5	3	0	0.768784	0.9	0
208063_s_at	CAPN9	4.58841	13.9319	29.473	2.62194	21.6818	0.0732362	0.421211	1	0	0.709836	4	3	1	5	2	5	0.768653	0.7	0
217964_at	TTC19	1318.99	2022.49	2081.39	1010.34	1118.71	0.288175	0.945007	1	0	0.101181	3	2	1	5	4	0	0.768492	0.8	0
211174_s_at	CCKAR	4.71397	11.3786	21.6201	3.84359	15.112	0.0489624	0.423875	1	0	0.633893	4	3	1	5	2	4	0.768405	0.7	0
AFFX-hum_alu_at	AFFX-hum_alu_at	21669.4	21495.9	21304.8	17990.7	23583.2	0.657792	0.626768	0.592597	0	1	2	3	4	5	1	5	0.768378	0.2	0
219437_s_at	ANKRD11	313.549	763.425	476.904	282.605	676.734	0.0643567	1	0.404099	0	0.819702	4	1	3	5	2	5	0.768371	0.9	0
217013_at	AZGP1P1	2.78443	7.70519	5.90785	1.5759	2.32171	0.197173	1	0.706762	0	0.12168	3	1	2	5	4	5	0.768256	0.9	0
201157_s_at	NMT1	1687.57	1798.85	1694.86	1363.84	1478.06	0.74419	1	0.760948	0	0.262569	3	1	2	5	4	5	0.768211	0.9	0
213892_s_at	APRT	733.657	1392.97	947.078	560.231	1456.23	0.193556	0.929397	0.431749	0	1	4	2	3	5	1	0	0.768086	0.7	0
200663_at	CD63	5953.31	8253.6	7117	5263.46	5695.24	0.230708	1	0.619884	0	0.144401	3	1	2	5	4	5	0.767985	0.9	0
212697_at	FAM134C	557.051	1504.91	1141.72	575.398	793.175	0	1	0.616831	0.0193563	0.249113	5	1	2	4	3	3	0.767912	0.9	0
211350_s_at	C6orf54	6.25923	31.1814	19.7957	1.82251	6.45864	0.15112	1	0.612189	0	0.157912	4	1	2	5	3	1	0.767768	1	0
212470_at	SPAG9	824.494	1129.07	1033.95	763.359	806.602	0.167168	1	0.739904	0	0.118244	3	1	2	5	4	0	0.767636	0.9	0
218830_at	RPL26L1	2675.33	2889.04	3015.3	2553.17	3207.59	0.186669	0.513233	0.706167	0	1	4	3	2	5	1	5	0.767538	0.6	0
217158_at	LOC728683;LOC442421	1.65532	8.55119	9.38616	3.29289	6.32542	0	0.891995	1	0.211823	0.604087	5	2	1	4	3	0	0.767521	0.8	0
213996_at	YPEL1	13.2121	73.5137	47.4616	18.5371	39.7932	0	1	0.56797	0.0883061	0.440803	5	1	2	4	3	0	0.767163	0.9	0
214224_s_at	PIN4	1051.75	2119.29	1931.77	868.662	1006.08	0.146397	1	0.850059	0	0.109879	3	1	2	5	4	4	0.767131	0.9	0
202830_s_at	SLC37A4	141.021	160.153	130.611	29.6473	226.087	0.566961	0.664355	0.513968	0	1	3	2	4	5	1	0	0.767129	0.5	0
222348_at	MAST4	3.45631	11.2098	13.4137	1.04043	2.47968	0.19525	0.821882	1	0	0.116319	3	2	1	5	4	5	0.766804	0.8	0
219472_at	CENPO	43.6851	38.3387	31.1709	4.64405	34.5608	1	0.863057	0.67946	0	0.76629	1	2	4	5	3	0	0.766797	0.3	0
204145_at	FRG1	636.099	1150.83	723.36	521.241	912.716	0.182433	1	0.321033	0	0.621795	4	1	3	5	2	4	0.76675	0.9	0
221255_s_at	TMEM93	1198.95	1187.45	1554.8	951.63	1221.23	0.410034	0.390968	1	0	0.446972	3	4	1	5	2	0	0.766691	0.4	0
220706_at	ADAMTS7	3.02055	4.99397	4.64434	2.31162	2.56264	0.264294	1	0.869655	0	0.0935821	3	1	2	5	4	0	0.766648	0.9	0
204696_s_at	CDC25A	60.8081	57.0343	47.9197	9.30498	74.5211	0.78973	0.731864	0.592104	0	1	2	3	4	5	1	1	0.766614	0.2	0
220353_at	FAM86C	58.2481	131.496	108.298	55.0541	67.4695	0.0417834	1	0.696528	0	0.162416	4	1	2	5	3	5	0.766431	1	0
212510_at	GPD1L	88.1534	473.385	680.44	126.035	299.601	0	0.650414	1	0.0639582	0.357002	5	2	1	4	3	5	0.766421	0.8	0
202680_at	GTF2E2	377.037	636.832	937.213	384.192	694.121	0	0.463774	1	0.0127728	0.566044	5	3	1	4	2	5	0.766393	0.6	0
209890_at	TSPAN5	146.244	589.295	223.682	38.6458	456.435	0.195402	1	0.336033	0	0.758721	4	1	3	5	2	4	0.7663	0.9	0
213737_x_at	GOLGA9P	798.801	1123.5	1521.57	342.101	1977.21	0.279309	0.477888	0.72134	0	1	4	3	2	5	1	5	0.766226	0.6	0
210212_x_at	LOC100133946;MTCP1	690.107	1170.3	681.607	301.487	1255.68	0.407276	0.910521	0.398368	0	1	3	2	4	5	1	0	0.76622	0.5	0
208296_x_at	TNFAIP8	650.197	500.869	639.675	208.305	539.478	1	0.662071	0.976189	0	0.749443	1	4	2	5	3	3	0.766124	0.1	0
220947_s_at	TBC1D10B	202.592	392.05	399.085	132.294	158.048	0.263495	0.973631	1	0	0.0965325	3	2	1	5	4	2	0.76597	0.8	0
202954_at	UBE2C	2158.53	5057.55	2323.4	766.114	4705.94	0.324464	1	0.362882	0	0.918067	4	1	3	5	2	5	0.765969	0.9	0
212252_at	CAMKK2	243.28	326.651	260.997	118.556	160.478	0.599361	1	0.6845	0	0.201456	3	1	2	5	4	0	0.765943	0.9	0
211194_s_at	TP63	7.51999	40.6652	69.8292	2.38388	18.9631	0.0761522	0.56759	1	0	0.245817	4	2	1	5	3	0	0.765658	0.9	0
208246_x_at	208246_x_at	486.626	833.728	711.111	464.156	523.299	0.0608001	1	0.668219	0	0.160031	4	1	2	5	3	5	0.765372	1	0
201168_x_at	ARHGDIA	246	444.642	676.901	251.839	493.517	0	0.460992	1	0.0135507	0.574417	5	3	1	4	2	5	0.765049	0.6	0
212030_at	RBM25	357.939	675.875	506.012	323.27	711.085	0.0893957	0.909209	0.471209	0	1	4	2	3	5	1	0	0.764902	0.7	0
32128_at	CCL18	5.13637	32.0413	24.3893	9.90739	20.0792	0	1	0.715591	0.177329	0.555394	5	1	2	4	3	5	0.764899	0.9	0
207936_x_at	RFPL3	42.7219	38.3603	44.0124	24.1213	50.633	0.7016	0.537084	0.750276	0	1	3	4	2	5	1	5	0.764797	0.3	0
210886_x_at	TP53TG1	250.337	555.429	328.423	45.8813	140.57	0.401249	1	0.554495	0	0.185829	3	1	2	5	4	1	0.764786	0.9	0
202264_s_at	TOMM40	535.236	623.488	828.825	296.468	402.355	0.448511	0.614287	1	0	0.198902	3	2	1	5	4	5	0.764578	0.8	0
201748_s_at	SAFB	501.892	628.854	516.329	391.971	445.222	0.464031	1	0.524976	0	0.224799	3	1	2	5	4	5	0.764531	0.9	0
217755_at	HN1	942.762	3865.32	2777.25	1252.06	2136.84	0	1	0.627699	0.105831	0.408573	5	1	2	4	3	5	0.764498	0.9	0
215949_x_at	IGHM;LOC652494	4.36221	6.51458	4.90233	4.03127	5.11022	0.133266	1	0.350766	0	0.434481	4	1	3	5	2	5	0.764413	0.9	0
209488_s_at	RBPMS	300.194	407.934	779.527	172.928	436.206	0.209803	0.387416	1	0	0.434023	4	3	1	5	2	1	0.764403	0.7	0
212219_at	PSME4	903.545	1385.65	1390.04	1012.56	1418.16	0	0.936827	0.945357	0.211838	1	5	3	2	4	1	5	0.76432	0.5	0
222039_at	KIF18B	263.596	570.649	1178.03	71.0451	426.181	0.173942	0.45132	1	0	0.320814	4	2	1	5	3	5	0.764212	0.9	0
215354_s_at	PELP1	178.331	526.23	516.047	158.576	207.983	0.0537326	1	0.972303	0	0.134385	4	1	2	5	3	5	0.764145	1	0
204659_s_at	GFER	151.648	283.622	151.842	94.4793	216.687	0.302252	1	0.303277	0	0.646114	4	1	3	5	2	5	0.763944	0.9	0
209244_s_at	KIF1C	143.436	211.457	124.616	31.4419	88.7975	0.622137	1	0.51759	0	0.318615	2	1	3	5	4	1	0.763493	0.7	0
210472_at	MT1G	3.74261	10.3353	14.7741	4.78105	12.8719	0	0.597625	1	0.0941342	0.827566	5	3	1	4	2	0	0.763344	0.6	0
208929_x_at	RPL13	7716.74	10949.8	9563.98	7947.08	10766	0	1	0.57136	0.0712452	0.94315	5	1	3	4	2	4	0.7633	0.8	0
201291_s_at	TOP2A	989.766	2037.4	3358.24	367.221	3902.52	0.176094	0.472429	0.846044	0	1	4	3	2	5	1	1	0.763208	0.6	0
204792_s_at	IFT140	46.8898	87.3438	57.85	40.0255	81.0548	0.145066	1	0.376694	0	0.867092	4	1	3	5	2	5	0.763175	0.9	0
221621_at	C17orf86	54.6947	58.6884	53.7888	20.3636	82.5052	0.552466	0.616733	0.537888	0	1	3	2	4	5	1	3	0.763096	0.5	0
205780_at	BIK	47.5184	82.4584	38.1626	8.22868	37.3238	0.529299	1	0.403261	0	0.391961	2	1	3	5	4	5	0.76309	0.7	0
205644_s_at	SNRPG	6979.34	7470.93	9466.79	6352.33	8216.67	0.201322	0.359163	1	0	0.598608	4	3	1	5	2	0	0.762839	0.7	0
204081_at	NRGN	28.0648	86.3998	45.4691	2.09243	18.1001	0.308068	1	0.514506	0	0.189873	3	1	2	5	4	5	0.762749	0.9	0
207746_at	POLQ	98.5956	130.867	352.876	8.34286	191.223	0.261957	0.355624	1	0	0.530806	4	3	1	5	2	0	0.762648	0.7	0
210491_at	210491_at	8.00712	14.6528	17.7869	9.07791	17.4636	0	0.679533	1	0.10949	0.966942	5	3	1	4	2	5	0.762643	0.6	0
201418_s_at	SOX4	176.459	694.66	478.264	118.125	207.198	0.10118	1	0.624661	0	0.154497	4	1	2	5	3	5	0.762578	1	0
210377_at	ACSM3	25.6745	61.4253	98.0098	9.65207	26.5526	0.181336	0.58595	1	0	0.191274	4	2	1	5	3	3	0.762546	0.9	0
208815_x_at	HSPA4	4035.23	3855.31	4434.61	3461.94	4018.66	0.589398	0.404423	1	0	0.572363	2	4	1	5	3	2	0.762469	0.3	0
AFFX-DapX-3_at	AFFX-DapX-3_at	1861.53	2500.45	2056.57	1754.95	1985.18	0.142964	1	0.404588	0	0.308826	4	1	2	5	3	5	0.762433	1	0
220884_at	220884_at	8.4503	17.345	32.9003	6.80417	21.791	0.0630795	0.403923	1	0	0.574293	4	3	1	5	2	5	0.762328	0.7	0
221280_s_at	PARD3	62.822	116.021	141.44	65.4746	151.65	0	0.598899	0.885059	0.0298622	1	5	3	2	4	1	5	0.762268	0.5	0
209411_s_at	GGA3	147.122	352.069	348.369	158.675	194.696	0	1	0.981947	0.0563707	0.232128	5	1	2	4	3	1	0.762199	0.9	0
204133_at	RRP9	60.1766	170.63	90.8227	38.6794	80.1751	0.162919	1	0.395173	0	0.314479	4	1	2	5	3	5	0.762192	1	0
213534_s_at	PASK	137.529	198.012	148.638	39.0747	71.3637	0.619454	1	0.689349	0	0.203156	3	1	2	5	4	0	0.762051	0.9	0
200085_s_at	TCEB2	6429.73	6420.08	5379.33	3741.07	6344.9	1	0.996411	0.609322	0	0.968449	1	2	4	5	3	5	0.762047	0.3	0
206930_at	GLYAT	2.05216	13.577	11.5357	4.11094	7.43208	0	1	0.822878	0.178638	0.466811	5	1	2	4	3	0	0.761994	0.9	0
216095_x_at	MTMR1	1278.98	1330.67	951.45	483.731	1230.79	0.938968	1	0.552246	0	0.882069	2	1	4	5	3	5	0.761935	0.6	0
204739_at	CENPC1	128.174	128.623	154.37	56.5704	83.3125	0.732146	0.736737	1	0	0.273438	3	2	1	5	4	5	0.761931	0.8	0
207392_x_at	UGT2B15	10.6967	20.7633	32.0996	6.0411	36.8228	0.151246	0.478278	0.846558	0	1	4	3	2	5	1	0	0.76139	0.6	0
217464_at	217464_at	5.79585	24.6739	32.0448	7.25687	36.0327	0	0.624339	0.868111	0.0483192	1	5	3	2	4	1	5	0.761255	0.5	0
215882_at	CEP152	15.6297	28.6103	45.382	6.79462	53.5203	0.189084	0.466888	0.825828	0	1	4	3	2	5	1	4	0.761211	0.6	0
222382_x_at	NUP205	80.6366	210.495	222.006	81.1235	102.995	0	0.918575	1	0.00344417	0.158156	5	2	1	4	3	5	0.76116	0.8	0
212856_at	GRAMD4	78.2438	211.598	109.433	38.4172	86.5225	0.229971	1	0.410067	0	0.277775	4	1	2	5	3	0	0.76105	1	0
217838_s_at	EVL	182.01	475.066	251.919	142.759	325.463	0.118117	1	0.328491	0	0.549805	4	1	3	5	2	1	0.760901	0.9	0
219908_at	DKK2	17.0013	12.0428	20.7854	1.13827	23.2148	0.718547	0.493942	0.889956	0	1	3	4	2	5	1	0	0.760669	0.3	0
212894_at	SUPV3L1	768.818	1059.34	733.312	370.828	559.298	0.578044	1	0.526474	0	0.273735	2	1	3	5	4	0	0.760427	0.7	0
222280_at	222280_at	128.425	228.586	361.022	127.859	263.384	0.00242749	0.432003	1	0	0.581246	4	3	1	5	2	5	0.760421	0.7	0
200077_s_at	OAZ1	8293.49	11375.5	9944.25	8620.21	9969.72	0	1	0.535612	0.106009	0.543876	5	1	3	4	2	5	0.760406	0.8	0
207060_at	EN2	2.08634	69.0338	26.8527	1.37794	45.6771	0.0104706	1	0.376534	0	0.654772	4	1	3	5	2	5	0.760255	0.9	0
212564_at	KCTD2	141.85	172.763	173.459	60.9766	81.9	0.718987	0.993812	1	0	0.186015	3	2	1	5	4	5	0.760167	0.8	0
37652_at	CABIN1	183.557	366.379	238.481	128.48	181.195	0.231514	1	0.462385	0	0.221586	3	1	2	5	4	0	0.760116	0.9	0
219960_s_at	UCHL5	713.753	595.525	892.399	390.384	769.97	0.644142	0.408635	1	0	0.756125	3	4	1	5	2	0	0.759958	0.4	0
204454_at	LDOC1	1302.32	2148.47	1469.77	60.2408	3139.03	0.403431	0.678263	0.457819	0	1	4	2	3	5	1	3	0.759949	0.7	0
207987_s_at	GNRH1	5.38464	24.8747	27.8079	3.45909	39.764	0.0530383	0.589882	0.670675	0	1	4	3	2	5	1	5	0.759876	0.6	0
203209_at	RFC5	451.594	627.198	1489.52	146.065	827.741	0.22742	0.358131	1	0	0.507405	4	3	1	5	2	3	0.759591	0.7	0
205024_s_at	RAD51	287.218	292.604	240.16	70.8924	389.329	0.679336	0.69625	0.531558	0	1	3	2	4	5	1	3	0.759468	0.5	0
204252_at	CDK2	590.633	680.763	527.215	308.303	793.344	0.582075	0.767894	0.451327	0	1	3	2	4	5	1	5	0.75939	0.5	0
217047_s_at	FAM13A1	353.323	709.448	453.801	56.9717	163.464	0.454195	1	0.60819	0	0.163213	3	1	2	5	4	5	0.75934	0.9	0
215380_s_at	GGCT	3662.58	4574	3234.09	1157.99	2261.43	0.733192	1	0.607756	0	0.32302	2	1	3	5	4	3	0.759305	0.7	0
202352_s_at	PSMD12	2082.43	2187.59	2838.63	1841.29	2428.76	0.241783	0.347224	1	0	0.589037	4	3	1	5	2	5	0.759239	0.7	0
221097_s_at	KCNMB2	18.7025	16.1593	23.904	4.49554	29.5099	0.567952	0.466283	0.775893	0	1	3	4	2	5	1	0	0.759166	0.3	0
217400_at	PCNA	2.09674	40.2859	28.5139	2.63048	9.18546	0	1	0.691745	0.0139762	0.185621	5	1	2	4	3	5	0.759136	0.9	0
222054_at	LOC728448	14.0571	65.365	48.3503	5.38145	11.9025	0.144634	1	0.716344	0	0.108714	3	1	2	5	4	5	0.758846	0.9	0
218743_at	CHMP6	90.168	111.297	233.053	30.4994	217.759	0.294582	0.398895	1	0	0.924494	4	3	1	5	2	0	0.758821	0.7	0
203321_s_at	ADNP2	237.685	418.663	397.788	168.69	187.868	0.27601	1	0.916491	0	0.0767203	3	1	2	5	4	5	0.758544	0.9	0
212992_at	AHNAK2	1955.35	5158.32	2629.72	1407.94	3198.27	0.145961	1	0.325775	0	0.477373	4	1	3	5	2	0	0.758518	0.9	0
220666_at	220666_at	25.4953	40.8182	46.3298	16.5853	19.4154	0.299551	0.814702	1	0	0.095147	3	2	1	5	4	0	0.758509	0.8	0
220546_at	MLL	11.3957	43.3869	64.2759	9.86274	21.7282	0.0281726	0.616104	1	0	0.218062	4	2	1	5	3	0	0.758441	0.9	0
209384_at	PROSC	357.619	781.944	1099.12	431.65	915.634	0	0.572251	1	0.0998394	0.752548	5	3	1	4	2	4	0.758384	0.6	0
49306_at	RASSF4	4.20143	21.5526	20.0441	2.46791	4.43461	0.090833	1	0.920958	0	0.103051	4	1	2	5	3	4	0.757843	1	0
211049_at	TLX2	4.0348	25.5828	10.2023	2.03434	12.8303	0.0849508	1	0.346858	0	0.458457	4	1	3	5	2	3	0.757569	0.9	0
218275_at	SLC25A10	103.166	91.0331	129.389	15.2377	173.539	0.555449	0.478805	0.721101	0	1	3	4	2	5	1	5	0.757058	0.3	0
214321_at	NOV	38.5275	132.319	78.5992	10.8301	29.1399	0.227983	1	0.557821	0	0.150712	3	1	2	5	4	0	0.757002	0.9	0
214537_at	HIST1H1D	28.2421	28.5897	32.7479	15.2264	19.7599	0.742842	0.76268	1	0	0.258739	3	2	1	5	4	0	0.756888	0.8	0
AFFX-HUMRGE/M10098_5_at	AFFX-HUMRGE/M10098_5_at	1838.85	3532.44	7493.09	460.552	2653.47	0.195989	0.436811	1	0	0.311825	4	2	1	5	3	5	0.756726	0.9	0
219244_s_at	MRPL46	313.138	528.043	860.615	295.186	675.967	0.0317493	0.411824	1	0	0.673437	4	3	1	5	2	0	0.756533	0.7	0
91580_at	LRTM1	1.57226	5.02819	4.23677	1.69951	2.24059	0	1	0.770997	0.0368208	0.193386	5	1	2	4	3	5	0.756397	0.9	0
203860_at	PCCA	96.062	199.537	257.971	120.339	206.024	0	0.639094	1	0.149942	0.679159	5	3	1	4	2	5	0.756347	0.6	0
218057_x_at	COX4NB	1282.39	1530.01	1717.5	1111.1	1972.84	0.198772	0.486121	0.703693	0	1	4	3	2	5	1	5	0.756149	0.6	0
220863_at	MIP	15.9993	18.3495	31.0427	6.46506	34.6401	0.338393	0.421807	0.87232	0	1	4	3	2	5	1	3	0.756075	0.6	0
205907_s_at	OMD	4.16511	18.8494	12.644	4.42172	20.3574	0	0.906869	0.523637	0.0158477	1	5	2	3	4	1	0	0.75594	0.6	0
206316_s_at	KNTC1	393.846	480.109	1004.07	135.048	451.811	0.297804	0.397068	1	0	0.364505	4	2	1	5	3	5	0.755916	0.9	0
201003_x_at	UBE2V1;TMEM189;TMEM189-UBE2V1;RNPEP;UBE2V1P2	1606.01	1975.96	1893.38	1687.2	1833.62	0	1	0.776781	0.219462	0.615245	5	1	2	4	3	3	0.755828	0.9	0
212383_at	ATP6V0A1	391.791	453.386	552.971	165.827	763.054	0.378355	0.48149	0.648236	0	1	4	3	2	5	1	5	0.7558	0.6	0
200070_at	C2orf24	175.732	366.137	195.849	114.379	320.128	0.243698	1	0.323604	0	0.817249	4	1	3	5	2	5	0.755721	0.9	0
218124_at	RETSAT	400.366	646.344	417.133	317.553	557.89	0.251871	1	0.302867	0	0.730972	4	1	3	5	2	1	0.755259	0.9	0
205942_s_at	ACSM3	24.8953	73.015	109.627	2.17881	16.6995	0.211418	0.659259	1	0	0.135141	3	2	1	5	4	5	0.755123	0.8	0
220033_at	220033_at	18.4408	110.807	121.809	42.9377	116.2	0	0.893565	1	0.236987	0.945738	5	3	1	4	2	0	0.755093	0.6	0
219434_at	TREM1	17.6979	39.8137	14.4635	3.88393	28.2129	0.384471	1	0.294451	0	0.677126	3	1	4	5	2	5	0.754909	0.7	0
212539_at	CHD1L	723.583	2469.62	2104.17	1096.02	2348.13	0	1	0.790697	0.213304	0.93042	5	1	3	4	2	5	0.754872	0.8	0
206285_at	NPHP1	3.71535	29.7726	53.8146	6.32546	45.0769	0	0.520113	1	0.0520988	0.825592	5	3	1	4	2	2	0.754868	0.6	0
210821_x_at	CENPA	279.652	293.435	336.6	23.5178	541.609	0.494381	0.520984	0.604299	0	1	4	3	2	5	1	5	0.754701	0.6	0
202330_s_at	UNG	836.769	805.536	1728.42	334.564	1304.58	0.360299	0.337891	1	0	0.695923	3	4	1	5	2	3	0.754569	0.4	0
211762_s_at	KPNA2;LOC728860	3826.2	4575.75	8725.51	2295.43	5367.52	0.238064	0.354633	1	0	0.477769	4	3	1	5	2	5	0.754415	0.7	0
220753_s_at	CRYL1	35.8613	213.775	67.308	2.71585	134.151	0.157043	1	0.306038	0	0.622741	4	1	3	5	2	5	0.754352	0.9	0
207689_at	TBX10	13.4768	31.2044	12.0073	4.13305	22.3142	0.345153	1	0.29087	0	0.671601	3	1	4	5	2	1	0.754341	0.7	0
206704_at	CLCN5	67.5124	78.934	49.4221	26.4293	61.9411	0.782465	1	0.437919	0	0.676355	2	1	4	5	3	0	0.754018	0.6	0
217914_at	TPCN1	262.131	1366.75	540.019	128.435	694.931	0.107966	1	0.332374	0	0.457473	4	1	3	5	2	4	0.754018	0.9	0
201088_at	KPNA2;LOC728860	2175.54	2841.07	4989.82	1479.06	2844.91	0.198384	0.387953	1	0	0.389047	4	3	1	5	2	5	0.754017	0.7	0
200597_at	EIF3A	275.65	591.566	544.548	315.526	376.734	0	1	0.851169	0.126223	0.319971	5	1	2	4	3	5	0.753943	0.9	0
220808_at	THEG	2.17511	6.00766	7.18625	2.04778	2.79428	0.0247797	0.770634	1	0	0.145277	4	2	1	5	3	0	0.753918	0.9	0
214803_at	214803_at	4.68192	30.439	53.8276	7.0205	25.2131	0	0.524097	1	0.0475846	0.417762	5	2	1	4	3	0	0.75389	0.8	0
202431_s_at	MYC	1058.17	12987.2	6410.67	769.834	4113.06	0.0236005	1	0.461706	0	0.273645	4	1	2	5	3	5	0.753483	1	0
209415_at	FZR1	21.5446	36.9581	13.8008	2.04444	30.0729	0.558525	1	0.336727	0	0.802794	3	1	4	5	2	5	0.753314	0.7	0
217131_at	217131_at	2.53677	17.8014	21.4736	0.740289	3.03321	0.0866471	0.822884	1	0	0.110591	4	2	1	5	3	2	0.753299	0.9	0
211716_x_at	ARHGDIA	347.475	520.035	752.933	312.213	740.123	0.08001	0.471551	1	0	0.970934	4	3	1	5	2	5	0.753257	0.7	0
211373_s_at	PSEN2	118.077	206.1	203.015	125.478	242.097	0	0.709748	0.684873	0.0596759	1	5	2	3	4	1	0	0.753113	0.6	0
205344_at	CSPG5	14.1274	38.4736	18.8008	2.15697	44.5677	0.28225	0.856308	0.392444	0	1	4	2	3	5	1	2	0.753084	0.7	0
211156_at	CDKN2A	3.85226	7.17168	11.0009	3.48613	5.72039	0.0487214	0.490441	1	0	0.297316	4	2	1	5	3	0	0.752891	0.9	0
216184_s_at	RIMS1	6.17736	19.2302	24.3617	5.09672	31.0913	0.0415717	0.543709	0.741115	0	1	4	3	2	5	1	0	0.752826	0.6	0
201019_s_at	EIF1AP1;EIF1AX	1858.81	2111.11	2673.32	1774.35	2263.01	0.093952	0.374606	1	0	0.543578	4	3	1	5	2	5	0.75273	0.7	0
219212_at	HSPA14	688.922	1010.08	1725.73	574.45	1386.42	0.0994302	0.378388	1	0	0.705276	4	3	1	5	2	5	0.752494	0.7	0
206596_s_at	NRL	6.93849	19.8063	40.3772	1.89629	40.7267	0.129852	0.461237	0.990999	0	1	4	3	2	5	1	0	0.752319	0.6	0
204473_s_at	ZNF592	67.4135	134.604	131.959	75.5975	87.7933	0	1	0.960634	0.121803	0.303314	5	1	2	4	3	0	0.751983	0.9	0
214885_at	MYST1	47.6552	60.0107	116.054	22.6434	54.9203	0.267762	0.400033	1	0	0.345538	4	2	1	5	3	5	0.75195	0.9	0
219297_at	WDR44	247.869	362.686	508.058	244.717	349.006	0.0119693	0.447971	1	0	0.396023	4	2	1	5	3	0	0.751949	0.9	0
213395_at	MLC1	4.14091	21.7926	35.8425	4.4021	12.8416	0	0.556808	1	0.00823902	0.274456	5	2	1	4	3	3	0.751697	0.8	0
200857_s_at	NCOR1	372.978	577.337	683.241	282.957	323.548	0.224893	0.735428	1	0	0.101406	3	2	1	5	4	5	0.751697	0.8	0
212525_s_at	H2AFX	59.4677	160.735	97.6723	47.3509	74.9313	0.106865	1	0.443814	0	0.243248	4	1	2	5	3	4	0.751689	1	0
216330_s_at	POU6F1	8.93092	28.2592	22.9276	13.1234	23.7032	0	1	0.724155	0.216909	0.764283	5	1	3	4	2	0	0.751663	0.8	0
200041_s_at	BAT1	4874.76	6055.3	5709.77	5089.67	5467.29	0	1	0.707312	0.182044	0.501914	5	1	2	4	3	5	0.751632	0.9	0
203255_at	FBXO11	777.601	1146.11	1404.41	751.585	882.393	0.0398514	0.604335	1	0	0.200372	4	2	1	5	3	5	0.751536	0.9	0
212693_at	MDN1	331.525	395.147	357.461	285.596	298.757	0.419248	1	0.655996	0	0.120136	3	1	2	5	4	0	0.751529	0.9	0
214888_at	CAPN2	67.1237	146.846	68.319	25.9682	68.0716	0.340472	1	0.35036	0	0.348314	4	1	2	5	3	0	0.75148	1	0
205061_s_at	EXOSC9	287.437	612.066	544.888	348.683	625.402	0	0.96054	0.761768	0.18122	1	5	2	3	4	1	3	0.751302	0.6	0
215787_at	ACTA2	9.02711	18.4159	39.2435	5.8409	29.1207	0.0953881	0.376468	1	0	0.696946	4	3	1	5	2	0	0.751295	0.7	0
220417_s_at	LOC728944;THAP4	297.48	664.803	454.74	251.09	332.85	0.112131	1	0.492249	0	0.197625	4	1	2	5	3	0	0.751153	1	0
205409_at	FOSL2	97.7875	133.463	94.0864	77.5348	106.116	0.36212	1	0.295944	0	0.511034	3	1	4	5	2	5	0.751013	0.7	0
218414_s_at	NDE1	100.169	190.71	95.7007	56.4204	155.179	0.325778	1	0.292504	0	0.735415	3	1	4	5	2	5	0.750943	0.7	0
212823_s_at	PLEKHG3	101.369	156.619	79.703	44.2073	129.805	0.508503	1	0.315765	0	0.761466	3	1	4	5	2	0	0.750926	0.7	0
204766_s_at	NUDT1	520.559	898.154	469.257	105.553	330.777	0.5236	1	0.458874	0	0.284158	2	1	3	5	4	5	0.750841	0.7	0
210407_at	PPM1A	77.5645	150.381	118.814	58.2433	187.507	0.149471	0.712789	0.468582	0	1	4	2	3	5	1	5	0.750816	0.7	0
206344_at	PON1	23.1286	16.1562	27.3068	5.36737	26.1934	0.809557	0.491755	1	0	0.949251	3	4	1	5	2	5	0.750527	0.4	0
211962_s_at	ZFP36L1	1383.71	2654.61	2263.28	396.27	582.434	0.437242	1	0.826718	0	0.082434	3	1	2	5	4	1	0.750433	0.9	0
214999_s_at	RAB11FIP3	36.2609	97.7818	100.875	54.0021	87.9434	0	0.952128	1	0.274572	0.799864	5	2	1	4	3	3	0.750409	0.8	0
218097_s_at	CUEDC2	964.443	1774.75	1744.19	1154.69	1404.47	0	1	0.962286	0.234784	0.543037	5	1	2	4	3	5	0.750374	0.9	0
209120_at	NR2F2	361.158	1450.76	843.518	420.974	1179.4	0	1	0.442694	0.0548971	0.750955	5	1	3	4	2	2	0.750206	0.8	0
204214_s_at	RAB32	808.517	992.935	818.211	447.188	1267.94	0.440241	0.664935	0.452053	0	1	4	2	3	5	1	4	0.750159	0.7	0
219754_at	RBM41	165.659	127.64	187.313	69.664	180.428	0.815944	0.492788	1	0	0.941478	3	4	1	5	2	0	0.749941	0.4	0
219481_at	TTC13	153.927	490.022	455.351	165.365	641.026	0	0.689993	0.618815	0.0234819	1	5	2	3	4	1	5	0.749717	0.6	0
212186_at	ACACA	1631.25	1531.4	2692.32	783.959	2619.58	0.443989	0.391666	1	0	0.961884	3	4	1	5	2	5	0.749584	0.4	0
218875_s_at	FBXO5	496.339	402.538	411.115	134.251	503.423	0.980811	0.726726	0.749959	0	1	2	4	3	5	1	5	0.749556	0.1	0
205093_at	PLEKHA6	24.1266	58.6849	147.247	6.52004	111.318	0.125111	0.370681	1	0	0.74469	4	3	1	5	2	0	0.749369	0.7	0
201409_s_at	PPP1CB	1759.48	1870.2	2109.54	937.65	1177.44	0.701286	0.795766	1	0	0.204618	3	2	1	5	4	5	0.74936	0.8	0
216862_s_at	LOC100133946;MTCP1	704.299	1408.25	821.2	369.744	1551.93	0.282997	0.878462	0.381882	0	1	4	2	3	5	1	0	0.749197	0.7	0
216653_at	DR1	1.49066	2.1434	3.56301	0.646346	1.24997	0.289479	0.513276	1	0	0.206957	3	2	1	5	4	5	0.749183	0.8	0
203933_at	RAB11FIP3	55.3632	223.423	212.148	100.668	172.072	0	1	0.932911	0.269575	0.694448	5	1	2	4	3	5	0.749124	0.9	0
201695_s_at	NP	445.975	1331.07	943.894	316.921	1652.35	0.0966386	0.759418	0.469492	0	1	4	2	3	5	1	5	0.749039	0.7	0
210187_at	FKBP1A	107.87	267.469	164.657	99.4713	156.643	0.0499929	1	0.388015	0	0.340312	4	1	2	5	3	5	0.74899	1	0
207969_x_at	ACRV1	25.0806	19.4981	24.0864	3.69185	32.0736	0.753609	0.556916	0.71858	0	1	2	4	3	5	1	5	0.748891	0.1	0
205248_at	DOPEY2	52.275	118.805	60.9496	31.9751	63.2743	0.233789	1	0.333693	0	0.360466	4	1	3	5	2	5	0.748572	0.9	0
212062_at	ATP9A	823.523	1427.81	881.124	515.271	757.364	0.337796	1	0.400918	0	0.265296	3	1	2	5	4	0	0.748334	0.9	0
203776_at	GPKOW	455.011	877.859	895.318	338.992	374.326	0.208545	0.968617	1	0	0.0635131	3	2	1	5	4	5	0.748199	0.8	0
209408_at	KIF2C	703.954	773.25	733.093	287.067	1134.21	0.492109	0.573909	0.526506	0	1	4	2	3	5	1	0	0.747813	0.7	0
216361_s_at	MYST3	5.22529	36.1488	25.1118	10.9092	29.7664	0	1	0.643087	0.183805	0.793607	5	1	3	4	2	0	0.747636	0.8	0
200946_x_at	GLUD1	1622.97	2203.39	1950.95	1437.42	1504.76	0.242242	1	0.670431	0	0.0879147	3	1	2	5	4	5	0.747633	0.9	0
221795_at	NTRK2	7.20967	9.95241	14.3944	2.68976	18.9864	0.277352	0.445653	0.718224	0	1	4	3	2	5	1	1	0.747436	0.6	0
222116_s_at	TBC1D16	92.638	272.683	268.44	99.3755	121.787	0	1	0.976434	0.0374212	0.161898	5	1	2	4	3	5	0.74704	0.9	0
206494_s_at	ITGA2B	9.06895	41.3599	12.9888	1.42655	22.6406	0.191379	1	0.289539	0	0.531236	4	1	3	5	2	5	0.747013	0.9	0
215828_at	215828_at	66.9051	72.9709	145.265	37.8331	109.722	0.270609	0.32707	1	0	0.669158	4	3	1	5	2	0	0.746846	0.7	0
216521_s_at	BRCC3	298.789	283.912	386.547	212.678	388.99	0.488401	0.404022	0.986144	0	1	3	4	2	5	1	0	0.746765	0.3	0
209731_at	NTHL1	104.881	264.159	258.563	124.642	151.257	0	1	0.964866	0.124066	0.291164	5	1	2	4	3	5	0.746607	0.9	0
219004_s_at	C21orf45	240.856	649.141	308.084	164.862	418.458	0.156922	1	0.295743	0	0.523657	4	1	3	5	2	2	0.746605	0.9	0
222141_at	KLHL22	35.8482	56.6597	44.3777	30.5581	34.3709	0.202673	1	0.529454	0	0.146075	3	1	2	5	4	5	0.746345	0.9	0
201710_at	MYBL2	453.237	791.158	416.521	143.819	331.732	0.477984	1	0.421266	0	0.290285	2	1	3	5	4	5	0.746274	0.7	0
205509_at	CPB1	22.6482	24.7883	16.6429	2.8367	31.7965	0.684103	0.758002	0.476737	0	1	3	2	4	5	1	0	0.74627	0.5	0
212858_at	PAQR4	95.0775	247.058	96.4948	21.7621	103.7	0.325418	1	0.331709	0	0.36369	4	1	3	5	2	2	0.746263	0.9	0
215648_at	215648_at	40.5616	57.8521	94.9098	36.2763	71.5927	0.0730862	0.367977	1	0	0.602325	4	3	1	5	2	1	0.746082	0.7	0
209132_s_at	COMMD4	1127.26	1738.79	1615.46	899.988	2280.8	0.164593	0.60747	0.518153	0	1	4	2	3	5	1	0	0.746036	0.7	0
207380_x_at	NOX1	4.00889	9.53765	5.81089	1.75285	11.7092	0.226593	0.781893	0.407583	0	1	4	2	3	5	1	3	0.745967	0.7	0
211377_x_at	MYCN	4.1861	4.76525	9.56592	1.72861	4.48779	0.313563	0.387459	1	0	0.352057	4	2	1	5	3	0	0.745936	0.9	0
212734_x_at	RPL13	14354.4	20248.9	16349.1	14193.4	18771.4	0.0265874	1	0.35599	0	0.756007	4	1	3	5	2	0	0.745593	0.9	0
217895_at	PTCD3	901.511	873.67	914.297	492.196	1200	0.578289	0.538954	0.596353	0	1	3	4	2	5	1	3	0.745547	0.3	0
212988_x_at	ACTG1	10731	15482	17485.9	11948.5	16737.4	0	0.703341	1	0.18024	0.889192	5	3	1	4	2	4	0.745303	0.6	0
215050_x_at	MAPKAPK2	53.1349	101.613	73.6521	35.3394	43.1624	0.268516	1	0.578099	0	0.118041	3	1	2	5	4	5	0.745287	0.9	0
201829_at	NET1	166.05	879.578	604.337	160.24	268.923	0.00807687	1	0.617369	0	0.151088	4	1	2	5	3	5	0.745027	1	0
218860_at	NOC4L	80.6793	491.468	467.263	108.724	162.001	0	1	0.941077	0.0682704	0.197965	5	1	2	4	3	4	0.744892	0.9	0
222203_s_at	RDH14;NT5C1B	603.346	768.438	1396.8	426.645	1174.47	0.182137	0.352308	1	0	0.77083	4	3	1	5	2	5	0.744836	0.7	0
205294_at	BAIAP2	26.5558	99.1587	57.2834	8.13694	20.6042	0.202357	1	0.539942	0	0.13697	3	1	2	5	4	5	0.74478	0.9	0
218507_at	HIG2	316.726	672.108	874.174	147.604	213.666	0.232768	0.721891	1	0	0.0909231	3	2	1	5	4	4	0.744534	0.8	0
203783_x_at	POLRMT	4.30851	40.8718	18.839	2.03806	11.9724	0.0584659	1	0.432638	0	0.255817	4	1	2	5	3	5	0.744523	1	0
202900_s_at	NUP88	778.311	1994.51	1509.32	850.09	1093.09	0	1	0.60106	0.0590191	0.258822	5	1	2	4	3	5	0.744484	0.9	0
201024_x_at	EIF5B	1916.77	2846.58	3621.16	2110.08	2990.53	0	0.545538	1	0.113419	0.629997	5	3	1	4	2	5	0.744063	0.6	0
210651_s_at	EPHB2	115.739	196.372	128.962	47.0094	72.345	0.460153	1	0.548682	0	0.169625	3	1	2	5	4	0	0.743839	0.9	0
200699_at	KDELR2	1968.23	2754.77	2359.01	1251.11	1398.65	0.476916	1	0.736802	0	0.0981206	3	1	2	5	4	5	0.74383	0.9	0
201825_s_at	SCCPDH	616.185	1359.58	1121.81	643.787	752.987	0	1	0.680157	0.0371297	0.184023	5	1	2	4	3	5	0.743813	0.9	0
214458_at	TRAF3IP1	61.2616	41.0467	70.485	13.2828	58.5594	0.838758	0.485364	1	0	0.791519	2	4	1	5	3	0	0.743779	0.3	0
212033_at	RBM25	2151.32	2203.3	1763.63	1270.9	2139.58	0.944251	1	0.528453	0	0.93166	2	1	4	5	3	0	0.743704	0.6	0
212626_x_at	HNRNPC	6151.04	5600.75	6947.99	4747.07	6161.87	0.637901	0.387874	1	0	0.642822	3	4	1	5	2	1	0.743557	0.4	0
211576_s_at	SLC19A1	91.8944	207.271	162.596	73.9391	260.273	0.0963609	0.715554	0.475796	0	1	4	2	3	5	1	5	0.743398	0.7	0
214141_x_at	SFRS7	3054.71	3137.7	3747.14	2842.57	3456.62	0.23452	0.326266	1	0	0.678831	4	3	1	5	2	3	0.743231	0.7	0
201675_at	AKAP1	338.205	1353.74	1324.6	327.833	426.811	0.0101101	1	0.971596	0	0.0964785	4	1	2	5	3	5	0.743047	1	0
209527_at	EXOSC2	276.804	453.633	543.81	212.009	241.175	0.195283	0.72822	1	0	0.0879021	3	2	1	5	4	5	0.742636	0.8	0
206226_at	HRG	4.19007	20.1531	27.5149	2.61567	5.66482	0.0632309	0.704336	1	0	0.12246	4	2	1	5	3	5	0.742456	0.9	0
201663_s_at	SMC4	1529.74	1834.61	1949.44	1170.29	1233.17	0.461336	0.852621	1	0	0.0807033	3	2	1	5	4	5	0.742383	0.8	0
217472_at	217472_at	3.34032	29.1078	20.6017	4.77958	8.83816	0	1	0.66989	0.0558557	0.213364	5	1	2	4	3	0	0.742299	0.9	0
207399_at	BFSP2	5.48016	21.5912	22.4613	3.31453	4.57826	0.113107	0.954556	1	0	0.0660023	3	2	1	5	4	5	0.742207	0.8	0
208505_s_at	FUT2	5.16361	54.7835	20.2094	1.80133	44.7929	0.0634606	1	0.347439	0	0.811435	4	1	3	5	2	5	0.74199	0.9	0
221798_x_at	221798_x_at	20451.4	20040.6	20132.4	17040.9	22272.9	0.651854	0.573337	0.590883	0	1	2	4	3	5	1	3	0.741902	0.1	0
214550_s_at	TNPO3	648.924	857.613	589.871	350.237	499.329	0.58869	1	0.472301	0	0.293849	2	1	3	5	4	0	0.741842	0.7	0
218511_s_at	PNPO	206.021	527.909	390.329	195.139	243.734	0.0327013	1	0.586561	0	0.146032	4	1	2	5	3	5	0.741762	1	0
AFFX-r2-Bs-dap-3_at	AFFX-r2-Bs-dap-3_at	1853.87	2375.79	2271.52	1793.6	1831.73	0.103523	1	0.8209	0	0.0654941	3	1	2	5	4	5	0.741653	0.9	0
209439_s_at	PHKA2	209.524	486.584	694.001	173.059	258.466	0.0699982	0.601842	1	0	0.163947	4	2	1	5	3	5	0.741621	0.9	0
201214_s_at	PPP1R7	858.78	1506.06	1019.28	689.707	882.487	0.207108	1	0.403714	0	0.236148	4	1	2	5	3	5	0.741482	1	0
202382_s_at	GNPDA1	597.31	1267.34	1043.13	661.333	786.268	0	1	0.665373	0.0955524	0.282014	5	1	2	4	3	5	0.741466	0.9	0
213197_at	ASTN1	19.5349	17.1751	24.9184	9.50823	15.1813	0.650653	0.49752	1	0	0.368138	2	3	1	5	4	2	0.741406	0.5	0
221180_at	YSK4	9.7495	23.0785	36.7052	2.03018	6.55996	0.222619	0.607017	1	0	0.130635	3	2	1	5	4	2	0.741348	0.8	0
214361_s_at	RGS12	3.80995	17.107	14.7084	4.61145	6.22131	0	1	0.819614	0.0602765	0.181345	5	1	2	4	3	5	0.741298	0.9	0
203206_at	FAM53B	88.5156	185.337	116.545	45.01	66.1629	0.31003	1	0.509774	0	0.15074	3	1	2	5	4	5	0.741029	0.9	0
219341_at	CLN8	38.4744	63.7185	81.5558	43.2818	57.7907	0	0.585963	1	0.111589	0.448368	5	2	1	4	3	5	0.740912	0.8	0
214908_s_at	TRRAP	315.836	528.237	367.246	294.722	404.501	0.0904182	1	0.310575	0	0.470115	4	1	3	5	2	0	0.740879	0.9	0
221984_s_at	FAM134A	959.708	1442.6	1022.64	778.905	964.364	0.272419	1	0.367239	0	0.279434	4	1	2	5	3	2	0.740825	1	0
215276_at	WFDC8	7.96379	11.8869	7.33598	3.25224	13.9861	0.438943	0.804432	0.380454	0	1	3	2	4	5	1	0	0.740725	0.5	0
210047_at	SLC11A2	52.6203	120.472	142.063	71.8629	104.206	0	0.758605	1	0.215139	0.576746	5	2	1	4	3	5	0.74057	0.8	0
201313_at	ENO2	81.3268	523.331	335.087	47.5887	105.137	0.0709168	1	0.604315	0	0.120965	4	1	2	5	3	5	0.740221	1	0
209484_s_at	NSL1	844.297	1491.22	1895.73	935.308	1203.49	0	0.615277	1	0.086559	0.341622	5	2	1	4	3	5	0.739854	0.8	0
201027_s_at	EIF5B	772.781	1501.02	1606.52	994.933	1345.54	0	0.873462	1	0.266453	0.686976	5	2	1	4	3	5	0.739811	0.8	0
203202_at	KRR1	892.355	701.391	1072.72	435.627	864.097	0.716894	0.417151	1	0	0.672539	2	4	1	5	3	5	0.739692	0.3	0
201000_at	AARS	3313.95	2910.02	2447.01	926.88	3054.03	1	0.830784	0.636818	0	0.891113	1	3	4	5	2	5	0.739621	0.1	0
216348_at	RPS17L4	226.072	187.982	224.073	112.656	181.364	1	0.664157	0.982375	0	0.605805	1	3	2	5	4	0	0.73953	0.3	0
216636_at	216636_at	0.883752	16.6359	21.3043	1.34718	3.96924	0	0.771387	1	0.0226942	0.151097	5	2	1	4	3	0	0.739407	0.8	0
221199_at	GFRA4	1.68939	7.76905	4.34431	1.60071	3.14163	0.0143766	1	0.444787	0	0.249811	4	1	2	5	3	0	0.738799	1	0
203462_x_at	EIF3B	3361.94	5498.87	3302.43	1593.08	2544.4	0.452881	1	0.437645	0	0.243567	2	1	3	5	4	5	0.738658	0.7	0
202602_s_at	HTATSF1	1310.18	1191.98	1698.04	664.77	999.804	0.624629	0.510234	1	0	0.324246	2	3	1	5	4	5	0.738639	0.5	0
221982_x_at	LAGE3	25.1943	108.902	63.4728	33.0395	71.0919	0	1	0.457288	0.0937214	0.548308	5	1	3	4	2	5	0.738625	0.8	0
203178_at	GATM	57.4342	231.812	109.597	11.9453	53.6796	0.206893	1	0.44414	0	0.189816	3	1	2	5	4	5	0.738608	0.9	0
219494_at	RAD54B	289.553	329.525	441.414	72.9619	640.818	0.381419	0.45181	0.648848	0	1	4	3	2	5	1	2	0.738289	0.6	0
221974_at	IPW	386.612	264.662	383.365	3.39077	221.52	1	0.681777	0.991527	0	0.569199	1	3	2	5	4	5	0.738227	0.3	0
219812_at	PVRIG	2.08174	12.4966	7.94896	1.14435	2.44774	0.0825731	1	0.599406	0	0.114813	4	1	2	5	3	4	0.738081	1	0
212691_at	NUP188	366.736	436.386	414.423	277.524	292.06	0.561569	1	0.861748	0	0.0915008	3	1	2	5	4	0	0.738065	0.9	0
208700_s_at	TKT	6549.27	7218.04	11480.7	4613.77	6937.54	0.281858	0.379248	1	0	0.3384	4	2	1	5	3	5	0.737857	0.9	0
208558_at	OR10H1	4.3768	31.843	44.9532	12.4212	31.2935	0	0.676901	1	0.198253	0.663359	5	2	1	4	3	5	0.737809	0.8	0
201256_at	COX7A2L	2177.73	1958.3	2882.28	1501.91	2421.95	0.489593	0.330629	1	0	0.666517	3	4	1	5	2	5	0.737799	0.4	0
216252_x_at	FAS	74.2289	75.3455	161.319	23.1621	72.5682	0.369629	0.377711	1	0	0.357609	3	2	1	5	4	5	0.737403	0.8	0
201068_s_at	PSMC2	5246.14	6361.91	5540.14	4895.68	6600.83	0.20553	0.859883	0.377949	0	1	4	2	3	5	1	3	0.737085	0.7	0
203065_s_at	CAV1	4897.53	5585.85	4251.44	2165.13	3314.68	0.798779	1	0.609904	0	0.336055	2	1	3	5	4	5	0.736885	0.7	0
204702_s_at	NFE2L3	33.6444	115.279	63.2845	35.8474	76.8972	0	1	0.363083	0.0269861	0.529834	5	1	3	4	2	5	0.736688	0.8	0
208117_s_at	LAS1L	301.686	866.911	882.768	217.478	250.542	0.126573	0.976165	1	0	0.0496986	3	2	1	5	4	2	0.736582	0.8	0
200037_s_at	LOC653972;CBX3	5602.11	5842.79	5099.3	2973.16	4005.95	0.916129	1	0.740911	0	0.359904	2	1	3	5	4	5	0.736571	0.7	0
212126_at	CBX5	548.688	1316.41	2443.99	517.579	1254.9	0.0161487	0.414673	1	0	0.382743	4	2	1	5	3	0	0.736395	0.9	0
209358_at	TAF11	385.34	414.237	332.634	215.738	478.604	0.645203	0.755134	0.444698	0	1	3	2	4	5	1	1	0.736283	0.5	0
219208_at	FBXO11	64.9369	66.4261	96.7409	27.7375	42.7992	0.539095	0.560677	1	0	0.218275	3	2	1	5	4	0	0.735843	0.8	0
210921_at	210921_at	2.56195	3.34632	7.32289	1.42443	4.36782	0.19285	0.325829	1	0	0.49901	4	3	1	5	2	1	0.735522	0.7	0
205873_at	PIGL	156.377	329.086	169.231	50.5343	112.063	0.379975	1	0.426121	0	0.220888	3	1	2	5	4	5	0.735485	0.9	0
203210_s_at	RFC5	336.58	248.052	527.453	78.8519	490.504	0.574515	0.377173	1	0	0.917635	3	4	1	5	2	3	0.735418	0.4	0
215617_at	LOC26010	47.5774	214.419	247.945	57.2304	80.2272	0	0.832678	1	0.0481765	0.162949	5	2	1	4	3	3	0.73533	0.8	0
222018_at	NACAP1;NACA2;NACA	323.24	479.943	536.049	176.256	197.245	0.408524	0.84406	1	0	0.0583363	3	2	1	5	4	5	0.735137	0.8	0
216372_at	216372_at	1.97354	15.2694	12.2242	3.27803	5.05461	0	1	0.770966	0.0981125	0.231732	5	1	2	4	3	2	0.734941	0.9	0
203977_at	TAZ	87.6754	133.254	122.838	21.0504	224.347	0.327723	0.551921	0.500685	0	1	4	2	3	5	1	3	0.734871	0.7	0
201197_at	AMD1	501.369	1130.9	1165.6	641.388	784.118	0	0.947759	1	0.210799	0.425679	5	2	1	4	3	5	0.734811	0.8	0
208352_x_at	ANK1	1.79111	32.9154	30.2427	10.3593	20.9003	0	1	0.914128	0.275289	0.613964	5	1	2	4	3	5	0.734792	0.9	0
203176_s_at	TFAM	315.768	662.811	569.842	396.754	518.114	0	1	0.732111	0.23336	0.583057	5	1	2	4	3	2	0.734519	0.9	0
212759_s_at	TCF7L2	259.757	211.262	220.057	100.554	244.829	1	0.695389	0.750633	0	0.906233	1	4	3	5	2	5	0.734467	0	0
216543_at	LOC100093698	2.2439	9.16837	9.73586	2.475	3.17051	0	0.924253	1	0.0308464	0.123681	5	2	1	4	3	3	0.734348	0.8	0
215067_x_at	PRDX2	73.3117	154.631	74.5541	40.67	85.1803	0.286429	1	0.297331	0	0.390575	4	1	3	5	2	0	0.734188	0.9	0
214061_at	WDR67	142.822	346.479	379.087	208.153	315.525	0	0.861985	1	0.276516	0.730972	5	2	1	4	3	0	0.733925	0.8	0
219041_s_at	REPIN1	594.065	1734.29	1243.95	779.815	1202.95	0	1	0.569962	0.162906	0.534004	5	1	2	4	3	5	0.733822	0.9	0
218619_s_at	SUV39H1	107.173	443.909	323.467	63.0384	89.5305	0.115878	1	0.683772	0	0.0695567	3	1	2	5	4	1	0.7338	0.9	0
213503_x_at	ANXA2	18108.3	16637.6	17738.4	14293.7	17907	1	0.614455	0.90303	0	0.947229	1	4	3	5	2	0	0.733684	0	0
206263_at	FMO4	73.1336	82.678	46.3559	16.7874	75.2429	0.855148	1	0.448751	0	0.88716	3	1	4	5	2	5	0.733649	0.7	0
214915_at	ZNF362	30.9722	35.1359	33.3474	9.57081	15.0246	0.837133	1	0.930041	0	0.21333	3	1	2	5	4	0	0.733442	0.9	0
217733_s_at	TMSB10	23125.7	23046.4	20745	16764.3	24609.6	0.810855	0.800747	0.507399	0	1	2	3	4	5	1	0	0.73333	0.2	0
219468_s_at	CUEDC1	75.2259	355.875	230.801	102.095	169.089	0	1	0.55434	0.0957391	0.33445	5	1	2	4	3	1	0.733233	0.9	0
201667_at	GJA1	246.048	2771.72	5078.83	21.6205	5904	0.0381525	0.467515	0.859722	0	1	4	3	2	5	1	5	0.732607	0.6	0
204886_at	PLK4	206.842	142.455	242.589	47.2259	162.4	0.817023	0.487447	1	0	0.589539	2	4	1	5	3	0	0.73239	0.3	0
222375_at	222375_at	106.499	134.801	194.719	85.17	109.988	0.194698	0.453048	1	0	0.226547	4	2	1	5	3	5	0.732365	0.9	0
213700_s_at	213700_s_at	179.516	221.42	300.195	115.907	141.588	0.345161	0.572544	1	0	0.139353	3	2	1	5	4	5	0.732135	0.8	0
218202_x_at	MRPL44	36.3981	71.4835	78.3441	47.8678	69.2286	0	0.836442	1	0.27344	0.782685	5	2	1	4	3	5	0.731816	0.8	0
206715_at	TFEC	2.91778	18.4007	8.27862	2.85781	15.2379	0.00385836	1	0.348765	0	0.796511	4	1	3	5	2	5	0.731793	0.9	0
206339_at	CARTPT	30.6779	43.0969	22.5131	12.7993	30.1322	0.5901	1	0.320613	0	0.572088	2	1	4	5	3	2	0.73178	0.6	0
216499_at	216499_at	24.6258	23.7151	41.0676	15.0751	37.3619	0.367441	0.332404	1	0	0.857432	3	4	1	5	2	0	0.731779	0.4	0
209610_s_at	SLC1A4	364.435	378.332	497.15	221.841	602.022	0.375069	0.411622	0.724152	0	1	4	3	2	5	1	1	0.731627	0.6	0
205767_at	EREG	26.0058	537.378	548.256	6.13705	38.8113	0.0366502	0.979934	1	0	0.0602714	4	2	1	5	3	5	0.731627	0.9	0
203362_s_at	MAD2L1	755.249	768.414	1546.82	403.011	1312.36	0.307952	0.319462	1	0	0.795018	4	3	1	5	2	5	0.731574	0.7	0
222123_s_at	HIF3A	3.68004	13.703	28.3268	2.35872	27.554	0.0508825	0.436855	1	0	0.97024	4	3	1	5	2	5	0.731349	0.7	0
219057_at	RABEP2;LOC100133585	67.2989	54.4194	46.9143	6.53726	66.0993	1	0.788032	0.664515	0	0.980257	1	3	4	5	2	5	0.731223	0.1	0
218175_at	CCDC92	482.663	677.25	1164.15	53.7157	223.249	0.386288	0.561523	1	0	0.152673	3	2	1	5	4	5	0.731113	0.8	0
221458_at	HTR1F	19.8627	14.8513	26.8776	7.86539	23.034	0.631032	0.367443	1	0	0.797835	3	4	1	5	2	5	0.730884	0.4	0
217081_at	OR2H2	17.1272	14.0408	33.3225	0.965125	12.5915	0.499487	0.404102	1	0	0.359311	2	3	1	5	4	5	0.730821	0.5	0
206998_x_at	PRB3	3.64976	33.941	13.8212	3.95773	18.3278	0	1	0.335788	0.010167	0.484564	5	1	3	4	2	0	0.730795	0.8	0
208440_at	C3orf27	1.87914	3.37533	2.95992	2.0732	3.66259	0	0.83893	0.606005	0.108812	1	5	2	3	4	1	5	0.73079	0.6	0
207984_s_at	MPP2	74.4178	102.733	46.6868	15.7537	92.682	0.67446	1	0.355637	0	0.884444	3	1	4	5	2	5	0.730736	0.7	0
218705_s_at	SNX24	271.335	195.926	196.569	9.20116	221.092	1	0.712326	0.714779	0	0.808331	1	4	3	5	2	3	0.730565	0	0
218037_at	FAM134A	439.981	742.967	481.92	343.075	454.381	0.24233	1	0.347206	0	0.27834	4	1	2	5	3	5	0.730512	1	0
209919_x_at	GGT1	258.302	395.275	599.915	44.3649	106.871	0.385091	0.631644	1	0	0.112512	3	2	1	5	4	1	0.730489	0.8	0
200082_s_at	RPS7;LOC644315	11263.5	13077.7	15888.2	11352	14174.3	0	0.392285	1	0.0191364	0.629403	5	3	1	4	2	5	0.730469	0.6	0
205689_at	PCNXL2	72.7374	116.263	104.007	64.3492	66.3783	0.161579	1	0.763916	0	0.0390859	3	1	2	5	4	5	0.730398	0.9	0
209407_s_at	DEAF1	87.4322	180.846	240.867	56.7384	72.241	0.166698	0.674027	1	0	0.0841944	3	2	1	5	4	5	0.730384	0.8	0
216778_s_at	CYLC1	7.16125	18.3801	12.0678	1.41633	2.72679	0.338658	1	0.627895	0	0.0772505	3	1	2	5	4	5	0.730325	0.9	0
202441_at	ERLIN1	1243.03	1133.98	1186.6	839.9	1054.61	1	0.729492	0.86002	0	0.532607	1	3	2	5	4	5	0.730243	0.3	0
213659_at	ZNF75D	84.1604	77.0406	96.2672	64.3095	95.7689	0.621162	0.398373	1	0	0.984408	3	4	1	5	2	5	0.730169	0.4	0
AFFX-r2-Bs-dap-M_at	AFFX-r2-Bs-dap-M_at	1169.76	1560.78	1259.38	1130.5	1315	0.0912429	1	0.299526	0	0.428791	4	1	3	5	2	5	0.729944	0.9	0
206329_at	EXTL1	25.0615	18.5028	36.8929	2.36186	15.7933	0.657369	0.467433	1	0	0.388967	2	3	1	5	4	2	0.729861	0.5	0
220512_at	DLC1	29.9915	40.6582	58.0302	29.4597	52.6934	0.0186136	0.39196	1	0	0.813206	4	3	1	5	2	5	0.729579	0.7	0
202474_s_at	HCFC1	170.182	554.544	427.612	180.101	221.739	0	1	0.669759	0.0258064	0.134137	5	1	2	4	3	5	0.729474	0.9	0
210088_x_at	MYL4	3.91065	46.071	36.3716	15.2136	36.1035	0	1	0.76994	0.268094	0.763581	5	1	2	4	3	5	0.729318	0.9	0
213592_at	APLNR	11.2894	33.5999	40.9975	2.09997	3.65336	0.236247	0.809818	1	0	0.0399354	3	2	1	5	4	1	0.729278	0.8	0
211691_x_at	211691_x_at	2.81667	25.3761	21.6925	8.56657	15.0345	0	1	0.836716	0.254878	0.541584	5	1	2	4	3	5	0.729191	0.9	0
202624_s_at	CABIN1	108.492	247.68	162.994	90.7817	117.102	0.112878	1	0.460249	0	0.167754	4	1	2	5	3	5	0.728788	1	0
208430_s_at	DTNA	4.93485	29.6945	23.762	2.45246	44.7408	0.0587015	0.644197	0.503911	0	1	4	2	3	5	1	3	0.728772	0.7	0
207889_at	SARDH	1.4092	18.5233	36.5696	4.67826	26.8486	0	0.486744	1	0.0929756	0.723524	5	3	1	4	2	5	0.728713	0.6	0
206618_at	IL18R1	22.3502	39.2353	35.5215	2.46137	69.5043	0.296658	0.548513	0.493119	0	1	4	2	3	5	1	1	0.728685	0.7	0
221815_at	ABHD2	72.497	104.982	154.178	65.7101	156.381	0.074852	0.433126	0.975703	0	1	4	3	2	5	1	3	0.728413	0.6	0
205402_x_at	PRSS2	18.7517	98.3616	43.9121	1.72582	18.6896	0.176186	1	0.436549	0	0.175543	3	1	2	5	4	5	0.728355	0.9	0
203087_s_at	KIF2A	1018.68	766.144	1159.25	437.226	912.108	0.805311	0.45555	1	0	0.657709	2	4	1	5	3	3	0.72831	0.3	0
200919_at	PHC2	693.827	1660.01	832.873	386.608	1689.46	0.235805	0.977396	0.342529	0	1	4	2	3	5	1	5	0.728285	0.7	0
216221_s_at	PUM2	1208.27	1693.87	1920.25	946.877	992.785	0.268544	0.767427	1	0	0.0471638	3	2	1	5	4	5	0.728164	0.8	0
211784_s_at	SFRS1	3278.02	4860.75	5992.99	3531.02	4221.53	0	0.582964	1	0.093187	0.347521	5	2	1	4	3	0	0.728131	0.8	0
220530_at	NCRNA00120	16.8997	28.7278	14.0191	3.18948	33.7486	0.448646	0.835702	0.354383	0	1	3	2	4	5	1	0	0.728059	0.5	0
207131_x_at	GGT1	253.34	311.321	474.147	32.3332	95.2844	0.500226	0.63146	1	0	0.142484	3	2	1	5	4	5	0.728022	0.8	0
200596_s_at	EIF3A	1994.13	2601.47	3430.79	1674.41	1943.65	0.182034	0.527824	1	0	0.153293	3	2	1	5	4	5	0.727782	0.8	0
38043_at	FAM3A	206.835	478.107	232.137	111.96	221.953	0.259117	1	0.328221	0	0.300407	4	1	2	5	3	5	0.727525	1	0
203266_s_at	MAP2K4	347.409	759.887	880.419	409.608	489.651	0	0.773865	1	0.116694	0.266866	5	2	1	4	3	5	0.727462	0.8	0
208635_x_at	NACA	16430.8	19329.5	19434.3	14781.9	14878.8	0.354419	0.977474	1	0	0.020828	3	2	1	5	4	5	0.727407	0.8	0
212097_at	CAV1	6492.57	7839.97	6378.87	3596.27	4423.68	0.682494	1	0.655701	0	0.194974	2	1	3	5	4	0	0.727365	0.7	0
218970_s_at	CUTC	268.395	524.672	967.637	213.694	441.297	0.0725532	0.412469	1	0	0.301884	4	2	1	5	3	0	0.727325	0.9	0
210666_at	IDS	19.6669	90.5179	56.5198	24.4154	93.4394	0	0.960399	0.499548	0.0643668	1	5	2	3	4	1	0	0.727255	0.6	0
218001_at	MRPS2	584.366	1548.02	1004.78	285.829	395.342	0.236523	1	0.569606	0	0.0867642	3	1	2	5	4	3	0.727213	0.9	0
214661_s_at	NOP14	188.645	336.254	369.66	184.029	196.876	0.0248665	0.820041	1	0	0.0692072	4	2	1	5	3	0	0.727163	0.9	0
216777_at	216777_at	30.6937	33.2046	26.0513	3.23623	13.0555	0.916215	1	0.761305	0	0.327654	2	1	3	5	4	5	0.727116	0.7	0
211446_at	RGSL1	3.71958	9.76165	5.78106	2.83808	4.15678	0.127319	1	0.425067	0	0.190465	4	1	2	5	3	0	0.727002	1	0
209288_s_at	CDC42EP3	530.547	1181.31	481.471	177.234	546.22	0.351879	1	0.303002	0	0.367488	3	1	4	5	2	0	0.726988	0.7	0
205281_s_at	PIGA	252.107	548.182	424.254	165.549	183.742	0.226217	1	0.676118	0	0.0475469	3	1	2	5	4	5	0.726988	0.9	0
218141_at	UBE2O	100.278	218.656	203.106	81.7622	85.0384	0.135257	1	0.886408	0	0.0239324	3	1	2	5	4	0	0.726956	0.9	0
219449_s_at	TMEM70	1496.53	1916.33	2844.57	1430.12	2326.78	0.0469511	0.343745	1	0	0.633928	4	3	1	5	2	4	0.726821	0.7	0
209279_s_at	NSDHL	859.633	760.889	745.255	486.298	757.988	1	0.735508	0.693632	0	0.727738	1	2	4	5	3	0	0.726811	0.3	0
77508_r_at	RABEP2;LOC100133585	101.314	122.794	91.0478	75.2482	96.2219	0.548225	1	0.332303	0	0.441126	2	1	4	5	3	5	0.726703	0.6	0
215413_at	EXOC7	2.50884	10.4411	6.62704	1.90608	2.87624	0.070622	1	0.553128	0	0.113668	4	1	2	5	3	0	0.726529	1	0
202988_s_at	RGS1	5.15406	6.87148	7.02952	1.5857	2.11622	0.655488	0.970969	1	0	0.0974536	3	2	1	5	4	5	0.726461	0.8	0
211079_s_at	DYRK1A	23.3537	17.6676	20.7479	5.75851	26.0775	0.865948	0.586106	0.737703	0	1	2	4	3	5	1	5	0.726361	0.1	0
222032_s_at	USP7	4.63897	46.4825	65.9188	5.3594	12.7289	0	0.682827	1	0.0117564	0.132016	5	2	1	4	3	5	0.726238	0.8	0
200060_s_at	RNPS1	2380.25	2558.81	2675.19	1535.31	1710.55	0.741253	0.897902	1	0	0.153735	3	2	1	5	4	5	0.726084	0.8	0
217384_x_at	LOC647224;LOC100132941;LOC647187	2.09252	5.88931	2.48234	1.04791	2.78305	0.215766	1	0.296284	0	0.358396	4	1	3	5	2	4	0.725931	0.9	0
222067_x_at	HIST1H2BD	882.082	1621.62	762.107	352.565	801.271	0.417253	1	0.322714	0	0.353575	2	1	4	5	3	0	0.725797	0.6	0
213214_x_at	ACTG1	11434.9	16513.3	17938	13069.9	17280.3	0	0.78092	1	0.251419	0.898864	5	3	1	4	2	5	0.725574	0.6	0
215439_x_at	215439_x_at	13.0153	36.8546	25.1613	7.42473	9.49537	0.189962	1	0.602672	0	0.0703584	3	1	2	5	4	0	0.72554	0.9	0
52975_at	FAM125B	27.8398	238.04	195.106	26.5929	348.387	0.00387484	0.657088	0.523667	0	1	4	2	3	5	1	5	0.725359	0.7	0
217258_x_at	IGL@	2.23571	3.7337	2.76515	2.25786	2.82846	0	1	0.353434	0.0147865	0.395697	5	1	3	4	2	5	0.72532	0.8	0
210695_s_at	WWOX	135.405	100.455	186.846	53.1106	159.14	0.615352	0.354015	1	0	0.79283	3	4	1	5	2	5	0.72508	0.4	0
208907_s_at	MRPS18B	696.001	776.256	685.553	484.911	947.767	0.45606	0.629451	0.433487	0	1	3	2	4	5	1	0	0.724721	0.5	0
216796_s_at	216796_s_at	7.97203	9.08007	15.3132	1.16016	20.8443	0.346059	0.40235	0.719007	0	1	4	3	2	5	1	0	0.724682	0.6	0
204471_at	GAP43	6.72586	12.7923	26.669	1.58734	6.94124	0.204872	0.446739	1	0	0.213459	4	2	1	5	3	5	0.724661	0.9	0
222122_s_at	THOC2	522.769	579.354	691.45	379.836	416.467	0.458686	0.640273	1	0	0.117552	3	2	1	5	4	5	0.724604	0.8	0
217794_at	PRR13	1949.4	2348.14	2895.63	1396.64	1542.16	0.368755	0.634761	1	0	0.0970787	3	2	1	5	4	5	0.724484	0.8	0
206423_at	ANGPTL7	6.32443	9.90764	11.8454	4.09315	4.44611	0.287824	0.750039	1	0	0.04553	3	2	1	5	4	5	0.724444	0.8	0
217255_at	SQSTM1	2.11593	22.1815	12.9088	2.24733	5.17851	0	1	0.53788	0.00654853	0.152629	5	1	2	4	3	5	0.724411	0.9	0
210335_at	RASSF9	22.8479	34.1175	68.4202	6.02754	19.0692	0.269589	0.450213	1	0	0.209026	3	2	1	5	4	4	0.72439	0.8	0
200658_s_at	PHB	2006.45	2231.41	1804.11	1584.24	2160.72	0.652394	1	0.339741	0	0.890771	3	1	4	5	2	5	0.724389	0.7	0
203773_x_at	BLVRA	694.39	2479.42	1979.06	337.535	3758.96	0.1043	0.626021	0.479778	0	1	4	2	3	5	1	5	0.724381	0.7	0
202043_s_at	SMS	1395.52	1694.88	1180.42	832.711	1179.08	0.652783	1	0.403296	0	0.401741	2	1	3	5	4	5	0.724286	0.7	0
215197_at	215197_at	15.2435	14.7177	16.3788	9.3359	20.7969	0.515452	0.469575	0.61451	0	1	3	4	2	5	1	0	0.724271	0.3	0
217586_x_at	217586_x_at	215.625	238.305	287.991	206.446	231.42	0.112564	0.390692	1	0	0.30626	4	2	1	5	3	0	0.724254	0.9	0
202779_s_at	UBE2S;LOC731049	2429.9	6075.85	4554.31	2569.45	3077.45	0	1	0.582677	0.0382753	0.177608	5	1	2	4	3	5	0.724177	0.9	0
218945_at	C16orf68	466.164	730.9	519.167	232.749	294.155	0.468563	1	0.574962	0	0.123268	3	1	2	5	4	5	0.72416	0.9	0
217518_at	FER1L3	143.729	164.212	136.523	68.8145	221.517	0.490591	0.624728	0.443401	0	1	3	2	4	5	1	5	0.724148	0.5	0
202973_x_at	FAM13A1	635.761	1502.15	770.538	116.338	334.702	0.374815	1	0.47207	0	0.157571	3	1	2	5	4	5	0.724124	0.9	0
209385_s_at	PROSC	322.306	781.217	834.963	437.411	932.399	0	0.752198	0.840293	0.188668	1	5	3	2	4	1	0	0.724084	0.5	0
207783_x_at	HUWE1	17909.5	19314.6	20540.1	17945.6	20850.9	0	0.477698	0.894336	0.0122731	1	5	3	2	4	1	0	0.724019	0.5	0
207639_at	FZD9	5.45211	41.285	39.0849	15.1742	24.5361	0	1	0.938601	0.271317	0.532583	5	1	2	4	3	0	0.72397	0.9	0
208658_at	PDIA4	182.314	617.579	318.437	184.583	401.877	0	1	0.312736	0.00521292	0.504435	5	1	3	4	2	5	0.723885	0.8	0
209574_s_at	C18orf1	41.9634	25.8304	44.9366	3.81368	31.6357	0.9277	0.535388	1	0	0.676558	2	4	1	5	3	0	0.723837	0.3	0
219000_s_at	DSCC1	392.866	370.93	722.626	145.252	764.194	0.40006	0.364619	0.93284	0	1	3	4	2	5	1	2	0.723413	0.3	0
212178_s_at	POM121C;POM121	287.682	775.075	493.875	293.486	412.51	0	1	0.423053	0.0119083	0.256114	5	1	2	4	3	2	0.722916	0.9	0
210439_at	ICOS	19.8128	29.6614	15.8896	10.77	25.1363	0.478673	1	0.271002	0	0.760468	3	1	4	5	2	3	0.722777	0.7	0
203214_x_at	CDC2	593.371	720.323	1352.46	219.848	1551.83	0.280426	0.375737	0.850321	0	1	4	3	2	5	1	5	0.722684	0.6	0
210063_at	SARDH	7.46563	32.0088	21.3269	1.80049	3.28668	0.187536	1	0.646392	0	0.0491981	3	1	2	5	4	5	0.722569	0.9	0
214280_x_at	HNRNPA1	2028.77	4596.69	3107.36	1993.56	2557.69	0.013526	1	0.42787	0	0.216712	4	1	2	5	3	5	0.722303	1	0
217965_s_at	SAP30BP	597.397	765.408	744.1	490.448	494.469	0.388962	1	0.922505	0	0.0146239	3	1	2	5	4	1	0.722286	0.9	0
201405_s_at	COPS6	2296.86	3567.44	2282.93	1823.3	3218.89	0.271515	1	0.263528	0	0.800159	3	1	4	5	2	5	0.722263	0.7	0
204256_at	ELOVL6	1206.35	1825.15	837.403	397.175	1143.56	0.566659	1	0.308288	0	0.522688	2	1	4	5	3	5	0.722241	0.6	0
212913_at	C6orf26;MSH5	48.1392	189.182	329.285	53.3545	345.243	0	0.474726	0.946288	0.0175538	1	5	3	2	4	1	1	0.7222	0.5	0
206929_s_at	NFIC	347.171	629.056	456.6	329.85	654.651	0.053328	0.921198	0.390239	0	1	4	2	3	5	1	0	0.722189	0.7	0
201951_at	ALCAM	233.379	1963.48	894.29	274.647	1750.74	0	1	0.382007	0.0238529	0.877036	5	1	3	4	2	5	0.722187	0.8	0
200947_s_at	GLUD1	1134.76	2330.87	1593.82	854.853	1023.45	0.189637	1	0.500649	0	0.114224	3	1	2	5	4	5	0.722071	0.9	0
201883_s_at	B4GALT1	331.512	975.032	962.99	296.13	316.963	0.0521165	1	0.982263	0	0.0306863	3	1	2	5	4	5	0.722052	0.9	0
209465_x_at	PTN	17.5226	29.6537	22.5487	14.2366	15.6489	0.21314	1	0.539148	0	0.0916061	3	1	2	5	4	5	0.722027	0.9	0
204423_at	MKLN1	505.586	531.892	512.731	318.907	707.833	0.479986	0.547623	0.498357	0	1	4	2	3	5	1	0	0.722017	0.7	0
215624_at	TSC2	19.8412	55.7487	87.5995	2.95165	10.1819	0.199527	0.623726	1	0	0.0854156	3	2	1	5	4	0	0.721988	0.8	0
210421_s_at	SLC24A1	44.4876	47.12	38.9357	17.1856	27.1719	0.912061	1	0.726592	0	0.333606	2	1	3	5	4	2	0.721968	0.7	0
202690_s_at	SNRPD1	1967.88	2417.89	2636.28	1974.1	2866.45	0	0.500807	0.743849	0.00692211	1	5	3	2	4	1	5	0.721932	0.5	0
205823_at	RGS12	58.6406	48.8648	43.4125	15.6612	47.9399	1	0.772547	0.645688	0	0.751027	1	2	4	5	3	0	0.721832	0.3	0
202208_s_at	ARL4C	334.124	789.27	728.496	45.1509	55.4676	0.388343	1	0.918328	0	0.0138643	3	1	2	5	4	5	0.721823	0.9	0
219363_s_at	MTERFD1	861.187	881.597	1120.16	751.404	876.245	0.297712	0.35306	1	0	0.338546	4	2	1	5	3	5	0.721808	0.9	0
219733_s_at	SLC27A5	62.769	368.366	234.679	119.363	245.207	0	1	0.562538	0.185192	0.596989	5	1	3	4	2	3	0.721802	0.8	0
202102_s_at	BRD4	881.642	1355.61	1018.97	757.357	851.873	0.207747	1	0.437295	0	0.157987	3	1	2	5	4	5	0.72164	0.9	0
218992_at	C9orf46	365.897	417.123	573.693	330.806	415.886	0.144475	0.355379	1	0	0.350286	4	2	1	5	3	2	0.721626	0.9	0
201020_at	YWHAH	654.558	2439.9	1080.64	452.905	1113.65	0.101486	1	0.315922	0	0.332535	4	1	3	5	2	5	0.72159	0.9	0
205010_at	GNL3L	940.891	1759.13	1929.07	824.895	859.113	0.105052	0.846093	1	0	0.0309897	3	2	1	5	4	5	0.721344	0.8	0
222087_at	PVT1	82.4799	240.52	108.152	4.75005	44.291	0.329685	1	0.438571	0	0.16771	3	1	2	5	4	5	0.721267	0.9	0
203678_at	MTMR15	185.382	351.789	304.784	217.686	365.766	0	0.922515	0.661932	0.179085	1	5	2	3	4	1	5	0.720789	0.6	0
65493_at	HEATR6	90.1763	253.388	184.438	114.388	155.042	0	1	0.577543	0.148345	0.397433	5	1	2	4	3	5	0.720637	0.9	0
201458_s_at	BUB3	2777.6	2130.68	2963.24	1208.57	2264.31	0.894202	0.525518	1	0	0.601674	2	4	1	5	3	5	0.720624	0.3	0
221845_s_at	CLPB	232.709	528.603	279.779	145.187	239.393	0.228269	1	0.351034	0	0.245702	4	1	2	5	3	5	0.720591	1	0
208891_at	DUSP6	88.5118	849.053	433.725	78.2769	217.359	0.0132787	1	0.461156	0	0.180444	4	1	2	5	3	2	0.72052	1	0
208214_at	ADRB1	9.16387	18.8163	16.7134	1.11292	1.57526	0.454769	1	0.881215	0	0.0261159	3	1	2	5	4	5	0.72009	0.9	0
218009_s_at	PRC1	1216.6	1590.58	3303.69	758.655	2890.13	0.179937	0.326882	1	0	0.837503	4	3	1	5	2	5	0.719551	0.7	0
200812_at	CCT7	3717.35	3399.57	5683.68	2377.46	3999.15	0.405263	0.309148	1	0	0.490497	3	4	1	5	2	5	0.719331	0.4	0
215640_at	TBC1D2B	61.7774	67.623	98.3193	40.1899	113.017	0.296421	0.376688	0.798184	0	1	4	3	2	5	1	0	0.719209	0.6	0
216309_x_at	JRK	254.092	277.16	196.706	139.125	234.715	0.832883	1	0.417148	0	0.692506	2	1	4	5	3	5	0.719186	0.6	0
208758_at	ATIC	2308.63	3036.02	4121.33	2288.33	3971.1	0.0110747	0.407905	1	0	0.918041	4	3	1	5	2	5	0.719123	0.7	0
211972_x_at	RPLP0	13010.6	13480.7	12972.4	11637.4	14681.2	0.451147	0.605592	0.438596	0	1	3	2	4	5	1	5	0.718889	0.5	0
213346_at	C13orf27	176.607	243.569	216.293	121.573	331.815	0.261765	0.580265	0.450528	0	1	4	2	3	5	1	5	0.718852	0.7	0
212191_x_at	RPL13	8469.75	15604.6	11560	9267.63	13098.9	0	1	0.433121	0.111829	0.648808	5	1	3	4	2	5	0.718782	0.8	0
220212_s_at	THADA	177.107	306.633	467.768	135.63	185.937	0.124879	0.514855	1	0	0.151464	4	2	1	5	3	1	0.718731	0.9	0
207156_at	HIST1H2AM;HIST1H2AL;HIST1H2AI;HIST1H2AH;HIST1H2AK;HIST1H2AJ;HIST1H2AG	61.8532	191.813	73.7903	1.94964	43.2871	0.315509	1	0.378381	0	0.217722	3	1	2	5	4	5	0.718653	0.9	0
201550_x_at	ACTG1	13010.1	18267.8	21471.5	14574	20232.5	0	0.621375	1	0.184828	0.85357	5	3	1	4	2	1	0.718379	0.6	0
213745_at	ATRNL1	2.64716	9.77434	24.3998	1.89089	19.036	0.0335987	0.350237	1	0	0.761703	4	3	1	5	2	4	0.718046	0.7	0
204018_x_at	HBA1;HBA2	5.86416	10.8204	4.727	2.77764	7.71942	0.383764	1	0.242375	0	0.614438	3	1	4	5	2	5	0.717859	0.7	0
217106_x_at	DIMT1L	1713.04	1304.62	1890.32	812.771	1837.99	0.835478	0.456452	1	0	0.951436	3	4	1	5	2	5	0.717836	0.4	0
218211_s_at	MLPH	451.568	3767.52	5208.62	113.346	425.768	0.0663796	0.717169	1	0	0.061316	3	2	1	5	4	1	0.717804	0.8	0
217894_at	KCTD3	449.221	806.539	535.309	270.656	335.412	0.333216	1	0.493863	0	0.12084	3	1	2	5	4	5	0.71779	0.9	0
206528_at	TRPC6	2.09158	18.2855	47.0358	1.6014	20.1528	0.0107887	0.367213	1	0	0.408312	4	3	1	5	2	1	0.717753	0.7	0
209609_s_at	MRPL9	2318.26	3538.15	2365.36	1988.89	2786.08	0.212598	1	0.243	0	0.514562	4	1	3	5	2	0	0.717496	0.9	0
204455_at	DST	230.418	943.909	318.258	64.0495	368.145	0.189085	1	0.288919	0	0.345618	4	1	3	5	2	5	0.717488	0.9	0
211921_x_at	PTMA	14141.6	15835.4	12190.3	8102.68	10834.1	0.780957	1	0.528613	0	0.353229	2	1	3	5	4	2	0.71746	0.7	0
60474_at	FERMT1	126.575	858.866	268.476	3.74149	270.734	0.143644	1	0.309586	0	0.312226	4	1	3	5	2	5	0.717383	0.9	0
214502_at	HIST1H2BJ	28.612	41.309	41.1972	21.4864	21.4885	0.359468	1	0.99436	0	0.00010594	3	1	2	5	4	2	0.717321	0.9	0
206746_at	BFSP1	99.918	235.363	235.51	61.3831	60.6465	0.224584	0.999159	1	0.00421243	0	3	2	1	4	5	5	0.717311	0.6	0
217379_at	RPL10	324.282	678.299	455.414	347.548	558.116	0	1	0.370412	0.06572	0.660516	5	1	3	4	2	5	0.717303	0.8	0
200964_at	UBA1	2725.31	4593.16	3640.75	1790.79	1909	0.333475	1	0.660141	0	0.0421822	3	1	2	5	4	5	0.717235	0.9	0
218461_at	GPN3	523.231	851.94	1458.33	492.186	846.916	0.0321329	0.372361	1	0	0.367161	4	2	1	5	3	2	0.717233	0.9	0
206381_at	SCN2A	4.57467	12.3746	4.62386	1.37875	5.0424	0.290648	1	0.295121	0	0.333185	4	1	3	5	2	5	0.717152	0.9	0
210204_s_at	CNOT4	13.4959	13.4997	11.4112	3.49337	19.8254	0.612449	0.612681	0.484804	0	1	3	2	4	5	1	1	0.716943	0.5	0
213934_s_at	ZNF23	285.309	341.245	178.115	67.1165	335.49	0.79595	1	0.404914	0	0.979006	3	1	4	5	2	5	0.716777	0.7	0
208979_at	NCOA6	1376.75	1295.17	1322.15	915.507	1103.41	1	0.82313	0.881624	0	0.407384	1	3	2	5	4	0	0.716678	0.3	0
201327_s_at	CCT6A	2853.33	3588.52	3144.33	2332.7	2411.06	0.414574	1	0.646295	0	0.0623975	3	1	2	5	4	5	0.716677	0.9	0
221106_at	SLC22A17	5.12564	22.6148	17.2394	2.67274	3.10963	0.123001	1	0.730449	0	0.021908	3	1	2	5	4	0	0.716591	0.9	0
221008_s_at	AGXT2L1	3.55659	22.5474	14.1766	5.12084	24.9048	0	0.889574	0.497466	0.0732731	1	5	2	3	4	1	1	0.716379	0.6	0
218831_s_at	FCGRT	73.838	107.446	173.561	24.2339	41.6775	0.332184	0.557247	1	0	0.116815	3	2	1	5	4	5	0.716153	0.8	0
215156_at	WDR61	94.8611	77.2202	141.386	37.3567	78.7603	0.552771	0.383195	1	0	0.397999	2	4	1	5	3	5	0.716007	0.3	0
203337_x_at	ITGB1BP1	322.688	350.67	240.702	76.5898	189.173	0.897906	1	0.598774	0	0.410767	2	1	3	5	4	5	0.715888	0.7	0
213691_at	213691_at	74.1882	80.5123	116.057	57.0993	71.9075	0.28985	0.397115	1	0	0.251167	3	2	1	5	4	5	0.715646	0.8	0
205178_s_at	RBBP6	919.315	959.677	784.464	574.352	756.866	0.895252	1	0.545285	0	0.473662	2	1	3	5	4	5	0.71546	0.7	0
216515_x_at	LOC643287;PTMA	4765.87	4895.17	4381.01	3255.22	3841.18	0.921156	1	0.686478	0	0.357304	2	1	3	5	4	5	0.715418	0.7	0
203526_s_at	APC	103.536	197.28	213.696	132.72	162.101	0	0.85098	1	0.264924	0.531636	5	2	1	4	3	0	0.715399	0.8	0
212552_at	HPCAL1	1519.7	4485.85	2017.15	1164.77	3404.68	0.106872	1	0.256657	0	0.674452	4	1	3	5	2	5	0.715181	0.9	0
214540_at	HIST1H2BO	22.6649	33.3147	41.8148	24.6782	41.6959	0	0.556128	1	0.105134	0.993791	5	3	1	4	2	5	0.715181	0.6	0
208610_s_at	SRRM2	1906.94	2272.22	1603.18	1039.95	1473.6	0.703571	1	0.457067	0	0.351912	2	1	3	5	4	2	0.715179	0.7	0
218918_at	MAN1C1	4.26154	48.9612	29.48	12.3909	27.0542	0	1	0.564176	0.181866	0.509907	5	1	2	4	3	4	0.715163	0.9	0
202461_at	EIF2B2	986.444	1837.57	1645.54	944.64	2358.87	0.0295595	0.63139	0.495605	0	1	4	2	3	5	1	4	0.715123	0.7	0
216945_x_at	PASK	203.901	158.037	230.485	54.6919	125.715	0.848777	0.587879	1	0	0.404015	2	3	1	5	4	5	0.715103	0.5	0
217642_at	RNF40	7.48819	10.6991	10.6797	2.13528	19.0504	0.316457	0.506282	0.505135	0	1	4	2	3	5	1	5	0.715055	0.7	0
217984_at	RNASET2	1010.39	881.786	655.452	167.129	896.28	1	0.847492	0.579089	0	0.86468	1	3	4	5	2	5	0.715035	0.1	0
208333_at	LHX5	6.71137	4.62336	8.68613	2.0754	6.0835	0.70128	0.385428	1	0	0.606302	2	4	1	5	3	5	0.715001	0.3	0
221777_at	C12orf52	288.21	299.977	430.646	243.096	395.109	0.240544	0.303284	1	0	0.81052	4	3	1	5	2	0	0.714906	0.7	0
216249_at	PVT1	5.1823	33.1356	22.1868	8.02335	37.7777	0	0.857584	0.521684	0.0871611	1	5	2	3	4	1	1	0.714885	0.6	0
213505_s_at	SFRS14	237.097	260.608	259.745	142.745	373.812	0.408332	0.510081	0.506347	0	1	4	2	3	5	1	2	0.714858	0.7	0
217559_at	RPL10L	43.8619	30.1763	45.367	8.00113	28.9911	0.95972	0.593461	1	0	0.561742	2	3	1	5	4	5	0.714799	0.5	0
200617_at	KIAA0152	1041.5	893.511	1487.26	630.339	1106.18	0.479812	0.307113	1	0	0.555292	3	4	1	5	2	4	0.714701	0.4	0
207460_at	GZMM	2.41308	5.70582	5.12457	2.44917	2.56365	0	1	0.823475	0.0109605	0.0457279	5	1	2	4	3	5	0.714486	0.9	0
203274_at	F8A1;F8A3;F8A2	1975.48	2447.2	1842.37	930.285	3220.98	0.456279	0.662207	0.39817	0	1	3	2	4	5	1	5	0.714454	0.5	0
203908_at	SLC4A4	37.9269	243.953	135.648	37.9379	276.901	0	0.862127	0.408919	4.60301e-05	1	5	2	3	4	1	3	0.714314	0.6	0
207836_s_at	RBPMS	54.5668	105.614	210.823	44.5019	192.504	0.0605149	0.367434	1	0	0.889858	4	3	1	5	2	5	0.714273	0.7	0
221909_at	RNFT2	36.3114	118.321	375.15	4.07412	209.674	0.0868752	0.30788	1	0	0.554064	4	3	1	5	2	5	0.714135	0.7	0
219941_at	TMEM19	41.059	32.9114	38.3662	17.6398	45.9028	0.828617	0.540339	0.73334	0	1	2	4	3	5	1	1	0.713603	0.1	0
219748_at	TREML2	2.13985	33.6221	26.0728	3.9495	5.84508	0	1	0.760205	0.0574816	0.117693	5	1	2	4	3	0	0.713603	0.9	0
206102_at	GINS1	1887.89	1156.32	2477.04	340.256	1864.99	0.724282	0.381912	1	0	0.713565	2	4	1	5	3	0	0.713544	0.3	0
219918_s_at	ASPM	1024.83	1001.11	2467.63	226.498	992.192	0.356218	0.345634	1	0	0.341655	2	3	1	5	4	0	0.71348	0.5	0
201746_at	TP53	85.7995	1567.74	813.209	76.0483	283.791	0.00653701	1	0.494178	0	0.139267	4	1	2	5	3	5	0.713461	1	0
213349_at	TMCC1	441.865	541.652	643.663	264.504	288.583	0.467775	0.730955	1	0	0.0635063	3	2	1	5	4	5	0.713289	0.8	0
210446_at	GATA1	3.90112	18.7364	13.2823	3.74848	4.73892	0.0101842	1	0.6361	0	0.0660826	4	1	2	5	3	4	0.713289	1	0
212434_at	GRPEL1	713.485	776.136	657.43	416.464	513.427	0.825811	1	0.66996	0	0.269587	2	1	3	5	4	0	0.713188	0.7	0
214996_at	214996_at	11.1888	43.3296	31.4423	17.816	26.7351	0	1	0.630149	0.206193	0.483694	5	1	2	4	3	3	0.713149	0.9	0
200681_at	GLO1	4288.06	5000.74	5214.97	3442.13	6709.38	0.258912	0.47704	0.542609	0	1	4	3	2	5	1	5	0.713131	0.6	0
216986_s_at	IRF4	23.2071	37.9222	21.0225	4.9974	11.6046	0.553069	1	0.486718	0	0.200675	2	1	3	5	4	5	0.713096	0.7	0
221772_s_at	PPP2R2D	301.093	391.701	274.157	236.719	344.428	0.415364	1	0.241564	0	0.694977	3	1	4	5	2	1	0.713051	0.7	0
215348_at	ADCY1	4.96585	23.3819	20.1329	10.082	23.7765	0	0.979023	0.806301	0.271982	1	5	2	3	4	1	3	0.712961	0.6	0
217317_s_at	HERC2P3;HERC2P2;LOC440248	999.984	975.559	1951.15	218.276	643.401	0.451105	0.43701	1	0	0.245329	2	3	1	5	4	5	0.712911	0.5	0
215310_at	APC	39.645	58.0104	27.5105	15.5381	48.9892	0.567591	1	0.281887	0	0.787598	3	1	4	5	2	0	0.712782	0.7	0
213651_at	INPP5J	29.4908	60.7576	29.1265	19.0815	50.3471	0.249767	1	0.241025	0	0.750205	3	1	4	5	2	5	0.712681	0.7	0
205489_at	CRYM	25.8155	40.9092	128.914	4.94206	70.029	0.168372	0.290123	1	0	0.525013	4	3	1	5	2	4	0.712653	0.7	0
219915_s_at	SLC16A10	2.08696	28.222	33.6839	6.83636	44.045	0	0.622885	0.75306	0.113194	1	5	3	2	4	1	0	0.712624	0.5	0
41657_at	STK11	68.8374	197.291	112.086	38.4883	57.3993	0.191112	1	0.463454	0	0.119085	3	1	2	5	4	3	0.712536	0.9	0
210602_s_at	CDH6	3.78451	5.21435	9.62042	2.41655	4.24354	0.189892	0.388375	1	0	0.253612	4	2	1	5	3	3	0.712535	0.9	0
216794_at	216794_at	21.7284	26.7169	29.8633	1.80764	54.0776	0.381113	0.47655	0.536745	0	1	4	3	2	5	1	3	0.712224	0.6	0
209100_at	IFRD2	621.961	1177.4	933.717	564.044	597.522	0.0944264	1	0.602705	0	0.0545817	3	1	2	5	4	5	0.712169	0.9	0
207880_at	ADAM11	4.75878	40.8799	22.5845	2.94242	6.97366	0.0478777	1	0.517749	0	0.10626	4	1	2	5	3	5	0.712044	1	0
210637_at	TACR1	3.69447	8.27497	5.60201	3.95136	5.20837	0	1	0.416448	0.0560834	0.33051	5	1	2	4	3	0	0.711889	0.9	0
217082_at	217082_at	10.3024	28.2354	18.5234	1.15942	43.6953	0.214947	0.636544	0.40822	0	1	4	2	3	5	1	5	0.711797	0.7	0
208657_s_at	2009-09-01	371.131	431.333	557.299	189.28	225.745	0.494135	0.657719	1	0	0.0990846	3	2	1	5	4	5	0.711783	0.8	0
208096_s_at	COL21A1	29.3647	46.3992	54.2406	18.1826	18.7291	0.310114	0.782534	1	0	0.0151561	3	2	1	5	4	5	0.711591	0.8	0
211208_s_at	CASK	987.76	1727.12	1260.11	273.328	368.332	0.491427	1	0.678764	0	0.0653491	3	1	2	5	4	2	0.711567	0.9	0
221598_s_at	LOC100131612;MED27	195.594	275.22	194.197	143.733	172.507	0.394419	1	0.383795	0	0.218835	2	1	3	5	4	0	0.711415	0.7	0
207258_at	DSCR4	4.54764	17.2931	17.6814	4.21847	4.40419	0.0244501	0.971158	1	0	0.0137949	3	2	1	5	4	5	0.711376	0.8	0
202609_at	EPS8	1252.54	2098.46	4190.08	129.411	740.892	0.276587	0.484908	1	0	0.150586	3	2	1	5	4	5	0.711166	0.8	0
AFFX-CreX-3_at	#VALUE!	13496.8	14228.2	14496.1	13759.4	14299.9	0	0.731912	1	0.262784	0.803663	5	3	1	4	2	5	0.711114	0.6	0
208365_s_at	GRK4	12.8657	71.5694	24.6971	1.31167	18.7661	0.164452	1	0.332852	0	0.248434	4	1	2	5	3	5	0.710978	1	0
216738_at	216738_at	6.1447	33.5974	36.3565	6.09078	6.82233	0.00178155	0.908837	1	0	0.0241709	4	2	1	5	3	5	0.710874	0.9	0
203409_at	DDB2	323.847	439.032	868.741	133.512	977.94	0.225401	0.361807	0.870683	0	1	4	3	2	5	1	0	0.710795	0.6	0
217424_at	217424_at	6.1395	12.0033	15.0242	3.37477	3.61207	0.237327	0.740683	1	0	0.0203701	3	2	1	5	4	3	0.710582	0.8	0
204029_at	CELSR2	113.935	80.3504	152.176	42.4774	121.689	0.651399	0.345246	1	0	0.722084	3	4	1	5	2	1	0.710561	0.4	0
201430_s_at	DPYSL3	46.3111	250.025	74.0947	18.1746	145.427	0.121356	1	0.24119	0	0.548856	4	1	3	5	2	5	0.710329	0.9	0
202836_s_at	TXNL4A	2543.57	2658.99	3368.29	1467.1	4397.98	0.367286	0.406666	0.648675	0	1	4	3	2	5	1	1	0.710235	0.6	0
210304_at	PDE6B	3.38299	38.6255	21.3205	2.04447	5.68885	0.0365905	1	0.526941	0	0.0996249	4	1	2	5	3	1	0.710043	1	0
221941_at	PAOX	57.9951	55.7705	80.9093	46.3063	68.9185	0.337797	0.273508	1	0	0.653475	3	4	1	5	2	5	0.709977	0.4	0
219258_at	TIPIN	364.443	434.44	979.558	190.047	868.366	0.220891	0.30955	1	0	0.859163	4	3	1	5	2	2	0.709771	0.7	0
221025_x_at	PUS7L	200.63	244.274	147.877	80.9478	153.954	0.73278	1	0.409789	0	0.446996	2	1	4	5	3	0	0.709633	0.6	0
213094_at	GPR126	683.824	822.91	1794.3	141.157	2068.26	0.281597	0.353771	0.857838	0	1	4	3	2	5	1	3	0.709615	0.6	0
220741_s_at	PPA2	2917.67	2184.96	2310.77	640.951	2171.07	1	0.678173	0.733432	0	0.672072	1	3	2	5	4	1	0.709597	0.3	0
213839_at	CLMN	127.346	444.121	248.154	105.488	161.821	0.0645478	1	0.4213	0	0.166354	4	1	2	5	3	5	0.709529	1	0
211831_s_at	THPO	0.970675	5.19438	5.25717	1.4117	1.64388	0	0.985352	1	0.102887	0.157053	5	2	1	4	3	5	0.709428	0.8	0
31837_at	LMF2	389.052	602.025	382.621	293.826	394.278	0.308976	1	0.288109	0	0.325932	3	1	4	5	2	5	0.709315	0.7	0
214096_s_at	SHMT2	1695.59	6570.74	3156.39	1084.58	2161.65	0.111373	1	0.377643	0	0.196325	4	1	2	5	3	0	0.709006	1	0
201060_x_at	STOM	2493.92	3388.51	1884.55	1323.82	2772.3	0.566719	1	0.271581	0	0.701548	3	1	4	5	2	5	0.708994	0.7	0
201356_at	SF3A1	566.395	1036.92	739.368	603.25	865.971	0	1	0.367617	0.0783274	0.636685	5	1	3	4	2	3	0.7089	0.8	0
204273_at	EDNRB	1.04285	9.58813	5.69726	0.556971	1.19375	0.0538003	1	0.569173	0	0.0705091	4	1	2	5	3	5	0.708873	1	0
212487_at	GPATCH8	237.06	295.47	372.224	165.994	180.014	0.344596	0.627823	1	0	0.0679823	3	2	1	5	4	1	0.708809	0.8	0
208004_at	PROL1	2.59523	20.9886	36.4688	3.64762	42.2032	0	0.464386	0.855221	0.0265702	1	5	3	2	4	1	5	0.708692	0.5	0
220224_at	HAO1	15.4877	18.6483	13.4354	4.99802	25.8777	0.502387	0.653759	0.404095	0	1	3	2	4	5	1	4	0.708635	0.5	0
215195_at	PRKCA	236.557	417	329.698	152.258	157.978	0.318419	1	0.670237	0	0.0216059	3	1	2	5	4	5	0.708597	0.9	0
208161_s_at	ABCC3	1314.61	1936.85	5979.68	332.928	3243.87	0.173849	0.284043	1	0	0.515507	4	3	1	5	2	0	0.708513	0.7	0
201143_s_at	EIF2S1	680.639	787.064	707.749	570.163	916.879	0.318635	0.625587	0.396826	0	1	4	2	3	5	1	5	0.708444	0.7	0
213877_x_at	TCEB2	84.0034	147.513	182.47	106.071	146.553	0	0.644986	1	0.224113	0.635237	5	2	1	4	3	0	0.708287	0.8	0
213600_at	SIPA1L3	166.737	124.357	220.555	76.4088	180.296	0.626643	0.332636	1	0	0.720707	3	4	1	5	2	4	0.708139	0.4	0
208049_s_at	TACR1	2.62365	3.54686	7.30852	1.99701	4.81682	0.117978	0.291791	1	0	0.530887	4	3	1	5	2	5	0.708132	0.7	0
AFFX-HUMRGE/M10098_3_at	AFFX-HUMRGE/M10098_3_at	685.728	9885.59	12499.4	187.836	519.552	0.040441	0.787695	1	0	0.0269434	3	2	1	5	4	4	0.708109	0.8	0
210950_s_at	FDFT1	5580.18	5033.41	6862.97	4114.93	5412.53	0.533198	0.334231	1	0	0.472191	2	4	1	5	3	0	0.708004	0.3	0
215721_at	IGHG1;LOC90925	4.03051	16.9622	37.4087	5.78485	22.9581	0	0.387429	1	0.0525595	0.567065	5	3	1	4	2	4	0.707993	0.6	0
207357_s_at	GALNT10	907.695	1179.1	560.256	140.901	620.56	0.738581	1	0.403925	0	0.462011	2	1	4	5	3	5	0.707986	0.6	0
201956_s_at	GNPAT	1998.4	2762.12	2689.68	1835.82	1815.41	0.19329	1	0.923482	0.0215589	0	3	1	2	4	5	5	0.707944	0.7	0
214960_at	API5	134.771	139.271	189.875	119.76	169.092	0.214091	0.278271	1	0	0.703587	4	3	1	5	2	0	0.707914	0.7	0
206230_at	LHX1	12.2757	55.7107	36.9013	2.22259	3.29483	0.18795	1	0.648344	0	0.0200463	3	1	2	5	4	5	0.707787	0.9	0
210025_s_at	CARD10	35.254	44.0411	17.8642	1.89182	29.4994	0.791524	1	0.378948	0	0.654995	2	1	4	5	3	4	0.707653	0.6	0
213827_at	SNX26	69.5867	64.5618	47.4016	19.881	69.3047	1	0.898907	0.553671	0	0.994327	1	3	4	5	2	0	0.707589	0.1	0
218758_s_at	RRP1	183.029	206.776	150.15	121.543	179.174	0.721387	1	0.335633	0	0.676158	2	1	4	5	3	5	0.707571	0.6	0
209029_at	COPS7A	875.102	891.076	984.355	626.479	680.121	0.694718	0.739354	1	0	0.14989	3	2	1	5	4	5	0.707567	0.8	0
213202_at	SETD1A	66.0447	47.6552	91.484	15.2843	101.893	0.586089	0.37376	0.879816	0	1	3	4	2	5	1	5	0.707478	0.3	0
207775_at	MGC4859	2.03647	19.8887	20.8613	2.64501	3.0719	0	0.948334	1	0.0323265	0.0550034	5	2	1	4	3	1	0.707411	0.8	0
203771_s_at	BLVRA	195.358	403.542	262.634	88.5055	552.667	0.230205	0.678722	0.375146	0	1	4	2	3	5	1	4	0.707032	0.7	0
213307_at	SHANK2	34.8396	78.8689	140.176	30.7299	149.048	0.0347343	0.406861	0.925016	0	1	4	3	2	5	1	1	0.706994	0.6	0
203240_at	FCGBP;LOC100133944	5.53726	33.753	59.9878	8.98994	20.718	0	0.51819	1	0.0634095	0.278799	5	2	1	4	3	0	0.706774	0.8	0
65635_at	FLJ21865	136.919	157.205	256.758	117.264	212.878	0.140902	0.286328	1	0	0.685434	4	3	1	5	2	5	0.706703	0.7	0
221176_x_at	WBSCR23	52.7343	98.3872	100.219	66.4204	109.232	0	0.808049	0.840471	0.242242	1	5	3	2	4	1	0	0.70669	0.5	0
221930_at	221930_at	2.33399	21.7468	9.34489	2.6495	8.06068	0	1	0.361148	0.0162527	0.294995	5	1	2	4	3	0	0.706627	0.9	0
218550_s_at	LRRC20	104.956	217.029	166.072	106.599	248.068	0	0.783114	0.42705	0.0114805	1	5	2	3	4	1	4	0.706434	0.6	0
207701_at	C22orf24	5.03563	17.1765	22.6024	4.22333	31.7857	0.0294713	0.469958	0.666817	0	1	4	3	2	5	1	5	0.706404	0.6	0
204748_at	PTGS2	5.55553	324.545	986.971	5.67272	642.004	0	0.32503	1	0.000119409	0.648501	5	3	1	4	2	2	0.706042	0.6	0
205374_at	SLN	32.3455	48.4876	67.8758	24.6264	83.8456	0.130348	0.40293	0.730327	0	1	4	3	2	5	1	1	0.705987	0.6	0
216789_at	216789_at	3.74477	21.4284	14.9124	5.15491	6.83701	0	1	0.631524	0.0797427	0.174865	5	1	2	4	3	0	0.705959	0.9	0
209863_s_at	TP63	20.0289	529.764	354.367	9.75523	29.2995	0.0197567	1	0.662704	0	0.0375845	4	1	2	5	3	5	0.705943	1	0
214771_x_at	MPRIP	1903.98	3245.03	2723.83	1580.05	1588.49	0.194555	1	0.686963	0	0.00506913	3	1	2	5	4	0	0.705906	0.9	0
218979_at	RMI1	840.513	999.258	1352.04	436.754	520.687	0.441129	0.614566	1	0	0.0917014	3	2	1	5	4	3	0.705469	0.8	0
210558_at	AKR1C4	20.5161	21.6639	69.6898	3.73257	38.252	0.254461	0.271863	1	0	0.523361	4	3	1	5	2	1	0.70518	0.7	0
212783_at	RBBP6	864.653	887.362	1057.3	560.216	629.558	0.612446	0.65813	1	0	0.139498	3	2	1	5	4	5	0.705008	0.8	0
205892_s_at	FABP1	2.19748	3.18435	4.59278	2.37061	3.93886	0	0.412003	1	0.072279	0.726999	5	3	1	4	2	2	0.704893	0.6	0
204275_at	SOLH	52.7964	218.036	191.45	76.0454	87.5365	0	1	0.839106	0.140699	0.210241	5	1	2	4	3	5	0.70487	0.9	0
202844_s_at	RALBP1	881.952	995.083	657.983	452.335	795.694	0.791559	1	0.378901	0	0.632631	2	1	4	5	3	5	0.704774	0.6	0
215703_at	CFTR	1.94704	20.8883	12.1118	0.889352	2.19253	0.0528872	1	0.561152	0	0.0651623	4	1	2	5	3	1	0.704687	1	0
207092_at	LEP	3.91458	22.552	27.3532	3.23211	3.69495	0.0282935	0.800954	1	0	0.0191882	3	2	1	5	4	5	0.704648	0.8	0
208827_at	PSMB6	3032.83	2777.03	3723.7	2245.12	3784.8	0.511606	0.345468	0.960316	0	1	3	4	2	5	1	5	0.704643	0.3	0
220102_at	FOXL2	22.5489	68.297	43.4031	1.55074	3.43884	0.314597	1	0.627037	0	0.0282877	3	1	2	5	4	0	0.704526	0.9	0
218155_x_at	TSR1	326.631	538.044	458.462	317.781	325.857	0.0401792	1	0.638696	0	0.0366653	3	1	2	5	4	5	0.704515	0.9	0
203744_at	HMGB3	857.39	1343.46	2799.2	723.813	2053.58	0.0643625	0.298569	1	0	0.640732	4	3	1	5	2	5	0.704489	0.7	0
212719_at	PHLPP	140.264	274.257	280.629	54.207	49.4935	0.392716	0.972432	1	0.0203928	0	3	2	1	4	5	5	0.704298	0.6	0
214606_at	TSPAN2	27.4611	20.3892	24.6378	1.18933	38.7774	0.698939	0.510797	0.623827	0	1	2	4	3	5	1	5	0.704113	0.1	0
31637_s_at	NR1D1;THRA	86.3843	263.065	139.867	46.4983	73.6836	0.184174	1	0.431131	0	0.125529	3	1	2	5	4	5	0.70399	0.9	0
202439_s_at	IDS	294.899	1178.53	434.627	196.095	886.096	0.100571	1	0.242797	0	0.702338	4	1	3	5	2	5	0.70395	0.9	0
211954_s_at	IPO5	684.509	1396.52	1993.3	738.62	950.427	0	0.544022	1	0.0413443	0.203178	5	2	1	4	3	5	0.703934	0.8	0
215083_at	215083_at	102.414	143.5	255.973	28.7768	57.5651	0.324113	0.504952	1	0	0.126711	3	2	1	5	4	0	0.703481	0.8	0
211996_s_at	LOC23117;LOC440345;LOC729602;LOC100132247;LOC348162	867.169	1317.33	1252.6	369.329	378.57	0.525147	1	0.931719	0	0.00974788	3	1	2	5	4	4	0.703422	0.9	0
214054_at	DOK2	35.9222	22.4439	33.19	5.35174	29.7087	1	0.559107	0.910626	0	0.796748	1	4	2	5	3	5	0.703301	0.1	0
220684_at	TBX21	24.8169	28.1454	29.7194	1.6584	5.84231	0.825291	0.943908	1	0	0.149101	3	2	1	5	4	5	0.703153	0.8	0
206074_s_at	HMGA1	564.628	2791.42	2190.9	1007.37	1332.88	0	1	0.730321	0.198825	0.345004	5	1	2	4	3	5	0.702943	0.9	0
216702_x_at	216702_x_at	33.751	73.6007	34.1395	16.3275	31.5318	0.304217	1	0.311001	0	0.26547	3	1	2	5	4	4	0.702854	0.9	0
205771_s_at	AKAP7	36.0474	73.3534	109.429	47.2055	88.1076	0	0.508384	1	0.152056	0.709445	5	3	1	4	2	4	0.702822	0.6	0
219205_at	SRR	469.959	411.708	391.15	63.9727	223.163	1	0.85652	0.805883	0	0.392108	1	2	3	5	4	0	0.702713	0.4	0
218449_at	UFSP2	355.19	597.127	295.09	207.762	486.537	0.378637	1	0.224283	0	0.715973	3	1	4	5	2	0	0.702497	0.7	0
206516_at	AMH	62.7628	145.686	99.4517	25.1178	28.4967	0.31223	1	0.61653	0	0.0280248	3	1	2	5	4	5	0.702364	0.9	0
218721_s_at	C1orf27	759.024	663.536	854.036	542.802	858.845	0.684154	0.382018	0.984784	0	1	3	4	2	5	1	1	0.702346	0.3	0
209926_at	MEF2B	28.0159	54.47	37.9498	30.5326	44.4808	0	1	0.375515	0.0951346	0.622395	5	1	3	4	2	5	0.70226	0.8	0
47530_at	C9orf156	72.4505	133.613	147.153	71.8334	72.9657	0.00819309	0.820233	1	0	0.0150333	4	2	1	5	3	5	0.702234	0.9	0
202015_x_at	202015_x_at	0.488958	17.8058	35.0925	0.823176	40.8872	0	0.428653	0.856561	0.00827308	1	5	3	2	4	1	5	0.701992	0.5	0
205565_s_at	FXN	277.45	385.649	349.749	197.064	196.49	0.428	1	0.810213	0.00303448	0	3	1	2	4	5	2	0.701958	0.7	0
207026_s_at	ATP2B3	5.73905	18.3607	22.2491	4.23199	4.31519	0.083646	0.784183	1	0	0.00461783	3	2	1	5	4	5	0.701917	0.8	0
222220_s_at	TSNAXIP1	55.4331	78.5977	50.512	41.9656	71.2278	0.367642	1	0.233304	0	0.798813	3	1	4	5	2	5	0.701802	0.7	0
218836_at	RPP21;TRIM39R	767.389	600.558	1020.38	396.579	746.909	0.594436	0.326994	1	0	0.561605	2	4	1	5	3	0	0.701722	0.3	0
212393_at	SBF1	83.6939	81.2402	81.0715	41.218	118.517	0.549501	0.517758	0.515576	0	1	2	3	4	5	1	5	0.701521	0.2	0
212115_at	HN1L	1835.41	2071.45	1722.61	1105.38	2644.11	0.474437	0.627836	0.40113	0	1	3	2	4	5	1	2	0.701471	0.5	0
203707_at	ZNF263	365.464	407.213	468.294	310.351	320.235	0.348942	0.613272	1	0	0.0625795	3	2	1	5	4	5	0.701471	0.8	0
40284_at	FOXA2	8.38569	337.73	473.324	1.17365	19.6832	0.0152749	0.712816	1	0	0.0392027	4	2	1	5	3	5	0.701324	0.9	0
214408_s_at	RFPL3S;RFPL1S	10.7784	15.0201	38.4297	0.746606	42.5894	0.23975	0.341122	0.900587	0	1	4	3	2	5	1	5	0.701295	0.6	0
203508_at	TNFRSF1B	12.4334	30.6056	12.9772	8.06397	19.9897	0.193838	1	0.217962	0	0.529054	4	1	3	5	2	5	0.700942	0.9	0
217752_s_at	CNDP2	2111.09	2111.3	1226.17	289.423	2241.71	0.933094	0.933201	0.47982	0	1	3	2	4	5	1	5	0.700935	0.5	0
48117_at	CCDC101	169.881	166.203	166.819	94.9741	234.203	0.538013	0.511596	0.51602	0	1	2	4	3	5	1	5	0.700873	0.1	0
217193_x_at	IGL@	3.4046	24.8619	31.6877	3.24013	3.99287	0.00578151	0.760057	1	0	0.0264606	4	2	1	5	3	5	0.700768	0.9	0
34225_at	WHSC2	152.123	282.594	186.758	106.354	124.452	0.259697	1	0.456219	0	0.10269	3	1	2	5	4	5	0.700644	0.9	0
214656_x_at	MYO1C	485.47	655.897	713.019	549.844	677.898	0	0.748968	1	0.282902	0.845655	5	3	1	4	2	5	0.700514	0.6	0
218646_at	C4orf27	994.861	1072.38	1128.04	831.871	844.693	0.550328	0.812067	1	0	0.0432929	3	2	1	5	4	0	0.700443	0.8	0
207436_x_at	KIAA0894	67.5402	211.995	175.787	108.266	149.398	0	1	0.749347	0.281928	0.566667	5	1	2	4	3	0	0.700188	0.9	0
211781_x_at	211781_x_at	43.9911	81.4895	31.7276	17.2557	63.0262	0.41622	1	0.2253	0	0.712561	3	1	4	5	2	0	0.700049	0.7	0
214053_at	ERBB4	9.54015	25.096	37.96	1.73104	2.92094	0.215549	0.644925	1	0	0.0328439	3	2	1	5	4	5	0.699828	0.8	0
204178_s_at	RBM14	273.467	433.524	710.37	243.001	347.504	0.0651862	0.40765	1	0	0.223598	4	2	1	5	3	5	0.699767	0.9	0
[truncated: 20,279 more rows]

## Sheet: examples_of_IC50_corr
	SIL IC50 normalized values and ranks of five NSCLC cell lines
				SIL, IC50 values			Rank of SIL IC50 amoung 5 NSCLC lines
		H1650	H1975	A549	H838	H2030	H1650	H1975	A549	H838	H2030
		0.56	1	0.86	0	0.71	4	1	2	5	3
	Examples of genes with significant correlation between the patterns of gene expression and SIL IC50
				Gene experession (GE)				Rank of GE among 5 NSCLC lines				Spearman abs. corr.
	Gene symbol	H1650	H1975	A549	H838	H2030	H1650	H1975	A549	H838	H2030	SIL
	FOXM1	391.311	823.6	899.932	41.2339	602.343	4	2	1	5	3	0.9
	BIRC5	764.946	1329.44	1402.13	166.38	867.871	4	2	1	5	3	0.9
	BRCA1	317.124	703.134	876.031	79.1803	512.497	4	2	1	5	3	0.9
	Examples of genes with non-significant correlation between the patterns of gene expression and SIL IC50
				Gene experession (GE)				Rank of GE among 5 NSCLC lines				Spearman abs. corr.
	Gene symbol	H1650	H1975	A549	H838	H2030	H1650	H1975	A549	H838	H2030	SIL
	TCF12	1076.32	1101.37	1729.44	1414.35	1069.7	4	3	1	2	5	0.1
	FBXL11	812.649	1524.08	323.089	1102.56	216.584	3	1	4	2	5	0.1
	ANAPC13	1373.87	2273.91	2798.66	4477.21	4514.81	5	4	3	2	1	0.2

## Sheet: GO_enrichment_144_pos
GO enrichment analysis of 144 genes positively correlating with the SIL IC50 signature of five NSCLC cell lines
UniProt keywords
#term ID	term description	observed gene count	background gene count	false discovery rate	matching proteins in your network (IDs)	matching proteins in your network (labels)
KW-0007	Acetylation	55	3335	7.55e-10	ENSP00000216122,ENSP00000217426,ENSP00000220003,ENSP00000220429,ENSP00000254654,ENSP00000256442,ENSP00000262105,ENSP00000262291,ENSP00000262300,ENSP00000262302,ENSP00000262375,ENSP00000262948,ENSP00000265056,ENSP00000265753,ENSP00000285968,ENSP00000290158,ENSP00000293288,ENSP00000296503,ENSP00000300035,ENSP00000301072,ENSP00000301740,ENSP00000305480,ENSP00000326550,ENSP00000331901,ENSP00000332706…	ACTB,ACTR1A,AHCY,AK1,BAX,BAZ1B,BRCA1,CCNB1,CENPF,CSK,DNAJA3,ECHS1,EEF1G,EIF4H,FEN1,FH,GABPB1,GLRX3,H2AFX,H3F3A,HAUS5,HMGB2,ILKAP,IPO9,KIAA0101,KPNB1,LMNA,LSM5,MAP2K2,MCM2,MCM4,MCM5,MECP2,MKI67,MYO1C,NUBP2,NUP205,PAFAH1B1,PDHA1,PKMYT1,PTTG1,PURA,RACGAP1,RANBP1,RFC4,RPL9,SMARCA4,SRRM2,TACC3,TAF15,TMSB4X,TUBA1B,TUBA1C,USP7,VMP1
KW-0131	Cell cycle	21	640	1.02e-07	ENSP00000216122,ENSP00000256442,ENSP00000262105,ENSP00000262300,ENSP00000265056,ENSP00000288207,ENSP00000298048,ENSP00000312981,ENSP00000326550,ENSP00000342307,ENSP00000355922,ENSP00000357643,ENSP00000377536,ENSP00000380378,ENSP00000387007,ENSP00000404190,ENSP00000405726,ENSP00000418960,ENSP00000434024,ENSP00000439056,ENSP00000479266	BORA,BRCA1,CCNB1,CCNB2,CDC45,CENPF,FOXM1,H2AFX,HAUS5,MCM2,MCM4,MCM5,MELK,MKI67,NCAPG2,PAFAH1B1,PKMYT1,PTTG1,RACGAP1,TACC3,USP39
KW-0597	Phosphoprotein	86	8066	1.02e-07	ENSP00000216122,ENSP00000217426,ENSP00000220003,ENSP00000237163,ENSP00000240316,ENSP00000254654,ENSP00000256442,ENSP00000257909,ENSP00000262027,ENSP00000262105,ENSP00000262300,ENSP00000262375,ENSP00000262948,ENSP00000265056,ENSP00000265753,ENSP00000282388,ENSP00000285968,ENSP00000288207,ENSP00000290158,ENSP00000296503,ENSP00000298048,ENSP00000300035,ENSP00000300128,ENSP00000301072,ENSP00000301740…	AHCY,AK1,ATP7A,BAZ1B,BCL7A,BORA,BRCA1,BRF1,CCNB1,CCNB2,CDC45,CENPF,COIL,CSK,CXCR2,DCUN1D2,DNAJA3,DOPEY1,ECHS1,EIF4H,EPB41L4B,EPHA5,FANCA,FEN1,FH,FOXM1,GABPB2,GLRX3,GRIN1,GTSE1,H2AFX,H3F3A,HAUS5,HMGB2,HMMR,ILKAP,KIAA0101,KIF4A,KPNB1,LMNA,MAP2K2,MAPK8,MARS,MCM2,MCM4,MCM5,MECP2,MELK,MET,MKI67,MYO1C,NCAPG2,NRF1,NUP205,PAFAH1B1,PAXIP1,PDE4C,PDHA1,PHKA1,PKMYT1,PPP1R12A,PTTG1,PURA,RACGAP1,RANBP1,RBMX2,R…
KW-0963	Cytoplasm	57	4972	6.79e-05	ENSP00000171111,ENSP00000216122,ENSP00000217426,ENSP00000220003,ENSP00000254654,ENSP00000256442,ENSP00000256682,ENSP00000257909,ENSP00000261558,ENSP00000262027,ENSP00000262302,ENSP00000262375,ENSP00000262948,ENSP00000265753,ENSP00000282388,ENSP00000290158,ENSP00000293288,ENSP00000296503,ENSP00000300035,ENSP00000301072,ENSP00000320092,ENSP00000326550,ENSP00000336799,ENSP00000343535,ENSP00000345728…	ACTB,ACTR1A,AHCY,AK1,AP5M1,ARF3,ATP7A,BAX,BRCA1,CCNB1,CDC45,CENPF,CSK,DNAJA3,EIF4H,EPB41L4B,FANCA,FH,GCA,GLRX3,GTSE1,HAUS5,HMGB2,HMMR,ILKAP,IPO9,KEAP1,KIAA0101,KIF4A,KPNB1,MAP2K2,MAPK8,MARS,MCM5,MYO1C,NUBP2,PAFAH1B1,PPP1R12A,PTTG1,RACGAP1,RGS3,RNF130,RPLP0,RPS26,SBF1,SH3GL3,SPIB,SPRY2,TACC3,TAF15,TMSB4X,TROAP,TUBA1B,TUBA1C,USP7,WHSC1,ZFP36L2
KW-0067	ATP-binding	24	1367	0.00031	ENSP00000216122,ENSP00000220003,ENSP00000262027,ENSP00000262105,ENSP00000262300,ENSP00000262302,ENSP00000262948,ENSP00000265056,ENSP00000269143,ENSP00000298048,ENSP00000317272,ENSP00000342434,ENSP00000345728,ENSP00000349960,ENSP00000352834,ENSP00000357643,ENSP00000358921,ENSP00000362271,ENSP00000363524,ENSP00000376272,ENSP00000378974,ENSP00000381504,ENSP00000395654,ENSP00000480763	ACTB,ACTR1A,AFG3L2,AK1,ATP7A,BAZ1B,CSK,EPHA5,KIF4A,MAP2K2,MAPK8,MARS,MCM2,MCM4,MCM5,MELK,MET,MKI67,MYO1C,NUBP2,PKMYT1,PRPS2,RFC4,SMARCA4
KW-0539	Nucleus	56	5200	0.00044	ENSP00000171111,ENSP00000216122,ENSP00000220429,ENSP00000240316,ENSP00000256442,ENSP00000262027,ENSP00000262105,ENSP00000262302,ENSP00000265056,ENSP00000282388,ENSP00000285968,ENSP00000290158,ENSP00000296503,ENSP00000300035,ENSP00000300128,ENSP00000301740,ENSP00000305480,ENSP00000312981,ENSP00000314129,ENSP00000332706,ENSP00000339090,ENSP00000342307,ENSP00000342434,ENSP00000343535,ENSP00000348020…	ACTB,BAZ1B,BRCA1,BRF1,CCNB1,CDC45,CENPF,COIL,FANCA,FEN1,FOXM1,GABPB1,GABPB2,H2AFX,H3F3A,HMGB2,HOXC4,IPO9,KEAP1,KIAA0101,KIF4A,KPNB1,LMNA,LSM5,MAPK8,MARS,MCM2,MCM4,MCM5,MECP2,MKI67,MLH3,MYO1C,NCAPG2,NRF1,NUBP2,NUP205,PAFAH1B1,PAXIP1,PTTG1,PURA,RACGAP1,RBMX2,RFC4,RGS3,RPLP0,SMARCA4,SPIB,SRRM2,TAF15,TFE3,TMEM194A,USP39,USP7,WHSC1,ZFP36L2
KW-0832	Ubl conjugation	33	2380	0.00044	ENSP00000171111,ENSP00000240316,ENSP00000256442,ENSP00000262105,ENSP00000265056,ENSP00000300035,ENSP00000301740,ENSP00000312981,ENSP00000314129,ENSP00000317272,ENSP00000331901,ENSP00000336799,ENSP00000339090,ENSP00000342307,ENSP00000342434,ENSP00000343535,ENSP00000349960,ENSP00000355778,ENSP00000357283,ENSP00000357643,ENSP00000363255,ENSP00000363524,ENSP00000370010,ENSP00000376924,ENSP00000377536…	ACTB,BAZ1B,BCL7A,BRCA1,CCNB1,COIL,EEF1G,FOXM1,H2AFX,H3F3A,KEAP1,KIAA0101,KIF4A,LMNA,MCM2,MCM4,MET,MKI67,NRF1,PTTG1,RACGAP1,RANBP1,RBMX2,RGS3,RPLP0,SMARCA4,SRRM2,TAF15,TFE3,TMSB4X,TUBA1B,USP39,USP7
KW-1017	Isopeptide bond	27	1713	0.00044	ENSP00000240316,ENSP00000262105,ENSP00000265056,ENSP00000300035,ENSP00000301740,ENSP00000312981,ENSP00000314129,ENSP00000331901,ENSP00000336799,ENSP00000339090,ENSP00000342307,ENSP00000342434,ENSP00000343535,ENSP00000349960,ENSP00000357283,ENSP00000357643,ENSP00000363524,ENSP00000370010,ENSP00000376924,ENSP00000395654,ENSP00000401564,ENSP00000404190,ENSP00000418960,ENSP00000434024,ENSP00000445868…	ACTB,BAZ1B,BCL7A,BRCA1,COIL,EEF1G,FOXM1,H2AFX,KIAA0101,KIF4A,LMNA,MCM2,MCM4,MKI67,NRF1,RACGAP1,RANBP1,RBMX2,RPLP0,SMARCA4,SRRM2,TAF15,TFE3,TMSB4X,TUBA1B,USP39,USP7
KW-0547	Nucleotide-binding	27	1758	0.00047	ENSP00000216122,ENSP00000220003,ENSP00000256682,ENSP00000262027,ENSP00000262105,ENSP00000262300,ENSP00000262302,ENSP00000262948,ENSP00000265056,ENSP00000269143,ENSP00000298048,ENSP00000301072,ENSP00000317272,ENSP00000336799,ENSP00000342434,ENSP00000345728,ENSP00000349960,ENSP00000352834,ENSP00000357643,ENSP00000358921,ENSP00000362271,ENSP00000363524,ENSP00000376272,ENSP00000378974,ENSP00000381504…	ACTB,ACTR1A,AFG3L2,AK1,ARF3,ATP7A,BAZ1B,CSK,EPHA5,KIF4A,MAP2K2,MAPK8,MARS,MCM2,MCM4,MCM5,MELK,MET,MKI67,MYO1C,NUBP2,PKMYT1,PRPS2,RFC4,SMARCA4,TUBA1B,TUBA1C
KW-0132	Cell division	11	377	0.00089	ENSP00000256442,ENSP00000288207,ENSP00000312981,ENSP00000326550,ENSP00000355922,ENSP00000377536,ENSP00000380378,ENSP00000387007,ENSP00000404190,ENSP00000439056,ENSP00000479266	BORA,CCNB1,CCNB2,CENPF,HAUS5,NCAPG2,PAFAH1B1,PTTG1,RACGAP1,TACC3,USP39
KW-0227	DNA damage	11	379	0.00089	ENSP00000300035,ENSP00000305480,ENSP00000342307,ENSP00000342434,ENSP00000343535,ENSP00000348020,ENSP00000373952,ENSP00000377536,ENSP00000384048,ENSP00000418960,ENSP00000434024	BAZ1B,BRCA1,FANCA,FEN1,FOXM1,H2AFX,KIAA0101,MLH3,PAXIP1,PTTG1,USP7
KW-0234	DNA repair	10	318	0.00091	ENSP00000300035,ENSP00000305480,ENSP00000342307,ENSP00000343535,ENSP00000348020,ENSP00000373952,ENSP00000377536,ENSP00000384048,ENSP00000418960,ENSP00000434024	BRCA1,FANCA,FEN1,FOXM1,H2AFX,KIAA0101,MLH3,PAXIP1,PTTG1,USP7
KW-0235	DNA replication	6	97	0.00091	ENSP00000216122,ENSP00000262105,ENSP00000265056,ENSP00000305480,ENSP00000376272,ENSP00000405726	CDC45,FEN1,MCM2,MCM4,MCM5,RFC4
KW-0498	Mitosis	9	268	0.0012	ENSP00000256442,ENSP00000288207,ENSP00000326550,ENSP00000355922,ENSP00000377536,ENSP00000380378,ENSP00000387007,ENSP00000439056,ENSP00000479266	BORA,CCNB1,CCNB2,CENPF,HAUS5,NCAPG2,PAFAH1B1,PTTG1,TACC3
KW-9995	Disease	43	3799	0.0012	ENSP00000017003,ENSP00000216122,ENSP00000217426,ENSP00000225927,ENSP00000262027,ENSP00000262948,ENSP00000264595,ENSP00000265056,ENSP00000265753,ENSP00000269143,ENSP00000285968,ENSP00000293288,ENSP00000314129,ENSP00000317272,ENSP00000332706,ENSP00000342434,ENSP00000345728,ENSP00000348020,ENSP00000348849,ENSP00000349960,ENSP00000355518,ENSP00000355778,ENSP00000355922,ENSP00000357283,ENSP00000357535…	ACTB,AFG3L2,AGA,AHCY,AK1,ATP7A,BAX,BAZ1B,BRCA1,BRF1,CDC45,CENPF,ECHS1,EIF4H,FANCA,FH,GCNT2,GRIN1,H3F3A,KIF4A,LMNA,MAP2K2,MARS,MCM2,MCM5,MECP2,MET,MLH3,NAGLU,NUP205,PAFAH1B1,PDHA1,PHKA1,PTTG1,PURA,RPS26,SBF1,SMARCA4,SPRY2,TAF15,TFE3,WHSC1,XYLT2
KW-0158	Chromosome	10	409	0.0050	ENSP00000296503,ENSP00000343535,ENSP00000355778,ENSP00000355922,ENSP00000357643,ENSP00000363524,ENSP00000372351,ENSP00000384048,ENSP00000418960,ENSP00000434024	BRCA1,CENPF,H2AFX,H3F3A,HMGB2,KIF4A,MKI67,PAXIP1,USP7,WHSC1
KW-0225	Disease mutation	34	2951	0.0055	ENSP00000017003,ENSP00000216122,ENSP00000217426,ENSP00000225927,ENSP00000262027,ENSP00000262948,ENSP00000264595,ENSP00000265056,ENSP00000269143,ENSP00000285968,ENSP00000317272,ENSP00000332706,ENSP00000345728,ENSP00000348020,ENSP00000348849,ENSP00000349960,ENSP00000355518,ENSP00000355778,ENSP00000357283,ENSP00000357535,ENSP00000360608,ENSP00000362271,ENSP00000362643,ENSP00000366306,ENSP00000368917…	ACTB,AFG3L2,AGA,AHCY,AK1,ATP7A,BRCA1,BRF1,CDC45,ECHS1,FANCA,FH,GCNT2,GRIN1,H3F3A,LMNA,MAP2K2,MARS,MCM2,MCM5,MECP2,MET,MLH3,NAGLU,NUP205,PAFAH1B1,PDHA1,PHKA1,PURA,RPS26,SBF1,SMARCA4,SPRY2,XYLT2
KW-0144	Charcot-Marie-Tooth disease	4	53	0.0058	ENSP00000225927,ENSP00000262027,ENSP00000357283,ENSP00000370196	LMNA,MARS,NAGLU,SBF1
KW-0488	Methylation	16	959	0.0058	ENSP00000262375,ENSP00000265753,ENSP00000301072,ENSP00000301740,ENSP00000305480,ENSP00000314129,ENSP00000336799,ENSP00000349960,ENSP00000352834,ENSP00000355778,ENSP00000355922,ENSP00000357283,ENSP00000363255,ENSP00000370196,ENSP00000395535,ENSP00000474096	ACTB,CENPF,DNAJA3,EIF4H,FEN1,H3F3A,LMNA,MECP2,MYO1C,RGS3,SBF1,SRRM2,TAF15,TFE3,TUBA1B,TUBA1C
KW-0493	Microtubule	8	275	0.0058	ENSP00000301072,ENSP00000336799,ENSP00000363524,ENSP00000366306,ENSP00000380378,ENSP00000404190,ENSP00000415430,ENSP00000439056	GTSE1,HAUS5,KIF4A,PAFAH1B1,RACGAP1,SPRY2,TUBA1B,TUBA1C
KW-0829	Tyrosine-protein kinase	5	110	0.0090	ENSP00000220003,ENSP00000262948,ENSP00000317272,ENSP00000342434,ENSP00000480763	BAZ1B,CSK,EPHA5,MAP2K2,MET
KW-0233	DNA recombination	4	75	0.0165	ENSP00000296503,ENSP00000384048,ENSP00000418960,ENSP00000434024	BRCA1,H2AFX,HMGB2,PAXIP1
KW-0687	Ribonucleoprotein	7	278	0.0230	ENSP00000282388,ENSP00000296102,ENSP00000348849,ENSP00000355315,ENSP00000400467,ENSP00000410758,ENSP00000449328	LSM5,MRPL33,RPL39,RPL9,RPLP0,RPS26,ZFP36L2
KW-0206	Cytoskeleton	16	1198	0.0425	ENSP00000256442,ENSP00000262302,ENSP00000301072,ENSP00000326550,ENSP00000336799,ENSP00000349960,ENSP00000355922,ENSP00000358921,ENSP00000363524,ENSP00000366306,ENSP00000370010,ENSP00000380378,ENSP00000389168,ENSP00000404190,ENSP00000415430,ENSP00000439056	ACTB,ACTR1A,CCNB1,CENPF,GTSE1,HAUS5,KIF4A,NUBP2,PAFAH1B1,PPP1R12A,RACGAP1,SPRY2,TACC3,TMSB4X,TUBA1B,TUBA1C
KW-0689	Ribosomal protein	5	174	0.0497	ENSP00000296102,ENSP00000348849,ENSP00000355315,ENSP00000400467,ENSP00000449328	MRPL33,RPL39,RPL9,RPLP0,RPS26
KW-0991	Mental retardation	8	415	0.0497	ENSP00000262948,ENSP00000332706,ENSP00000349960,ENSP00000360608,ENSP00000363524,ENSP00000395535,ENSP00000395654,ENSP00000448323	ACTB,BRF1,GRIN1,KIF4A,MAP2K2,MECP2,PURA,SMARCA4
Pfam protein domains
#term ID	term description	observed gene count	background gene count	false discovery rate	matching proteins in your network (IDs)	matching proteins in your network (labels)
PF00493	MCM2/3/5 family	3	9	0.0049	ENSP00000216122,ENSP00000262105,ENSP00000265056	MCM2,MCM4,MCM5
PF14551	MCM N-terminal domain	3	6	0.0049	ENSP00000216122,ENSP00000262105,ENSP00000265056	MCM2,MCM4,MCM5
PF17207	MCM OB domain	3	8	0.0049	ENSP00000216122,ENSP00000262105,ENSP00000265056	MCM2,MCM4,MCM5
PF07726	ATPase family associated with various cellular activities (AAA)	2	4	0.0352	ENSP00000262105,ENSP00000265056	MCM2,MCM4
Biological process
#term ID	term description	observed gene count	background gene count	false discovery rate	matching proteins in your network (IDs)	matching proteins in your network (labels)
GO:0022402	cell cycle process	33	890	8.31e-13	ENSP00000216122,ENSP00000256442,ENSP00000262105,ENSP00000262300,ENSP00000265056,ENSP00000288207,ENSP00000290158,ENSP00000293288,ENSP00000298048,ENSP00000300035,ENSP00000301633,ENSP00000305480,ENSP00000326550,ENSP00000342307,ENSP00000348020,ENSP00000355922,ENSP00000357283,ENSP00000358921,ENSP00000363524,ENSP00000366306,ENSP00000373952,ENSP00000376272,ENSP00000377536,ENSP00000380378,ENSP00000389168…	ACTR1A,BAX,BIRC5,BORA,BRCA1,CCNB1,CCNB2,CDC45,CENPF,FANCA,FEN1,FOXM1,GTSE1,HAUS5,KIAA0101,KIF4A,KPNB1,LMNA,MCM2,MCM4,MCM5,MECP2,MELK,MLH3,PAFAH1B1,PKMYT1,PPP1R12A,PTTG1,RACGAP1,RANBP1,RFC4,SPRY2,TACC3
GO:0000278	mitotic cell cycle	27	628	6.30e-12	ENSP00000216122,ENSP00000256442,ENSP00000262105,ENSP00000262300,ENSP00000265056,ENSP00000288207,ENSP00000290158,ENSP00000293288,ENSP00000298048,ENSP00000301633,ENSP00000326550,ENSP00000342307,ENSP00000355922,ENSP00000357283,ENSP00000358921,ENSP00000363524,ENSP00000366306,ENSP00000380378,ENSP00000389168,ENSP00000395535,ENSP00000401564,ENSP00000404190,ENSP00000405726,ENSP00000415430,ENSP00000418960…	ACTR1A,BAX,BIRC5,BORA,BRCA1,CCNB1,CCNB2,CDC45,CENPF,FOXM1,GTSE1,HAUS5,KIF4A,KPNB1,LMNA,MCM2,MCM4,MCM5,MECP2,MELK,PAFAH1B1,PKMYT1,PPP1R12A,RACGAP1,RANBP1,SPRY2,TACC3
GO:0007049	cell cycle	37	1263	6.30e-12	ENSP00000216122,ENSP00000256442,ENSP00000262105,ENSP00000262300,ENSP00000265056,ENSP00000288207,ENSP00000290158,ENSP00000293288,ENSP00000298048,ENSP00000300035,ENSP00000301633,ENSP00000305480,ENSP00000312981,ENSP00000326550,ENSP00000342307,ENSP00000348020,ENSP00000355922,ENSP00000357283,ENSP00000357643,ENSP00000358921,ENSP00000363524,ENSP00000366306,ENSP00000373952,ENSP00000376272,ENSP00000377536…	ACTR1A,BAX,BIRC5,BORA,BRCA1,CCNB1,CCNB2,CDC45,CENPF,FANCA,FEN1,FOXM1,GTSE1,H2AFX,HAUS5,KIAA0101,KIF4A,KPNB1,LMNA,MCM2,MCM4,MCM5,MECP2,MELK,MKI67,MLH3,NCAPG2,PAFAH1B1,PKMYT1,PPP1R12A,PTTG1,RACGAP1,RANBP1,RFC4,SPRY2,TACC3,USP39
GO:1903047	mitotic cell cycle process	26	564	6.30e-12	ENSP00000216122,ENSP00000256442,ENSP00000262105,ENSP00000262300,ENSP00000265056,ENSP00000288207,ENSP00000290158,ENSP00000293288,ENSP00000298048,ENSP00000301633,ENSP00000326550,ENSP00000342307,ENSP00000355922,ENSP00000357283,ENSP00000358921,ENSP00000363524,ENSP00000366306,ENSP00000380378,ENSP00000395535,ENSP00000401564,ENSP00000404190,ENSP00000405726,ENSP00000415430,ENSP00000418960,ENSP00000439056…	ACTR1A,BAX,BIRC5,BORA,BRCA1,CCNB1,CCNB2,CDC45,CENPF,FOXM1,GTSE1,HAUS5,KIF4A,KPNB1,LMNA,MCM2,MCM4,MCM5,MECP2,MELK,PAFAH1B1,PKMYT1,RACGAP1,RANBP1,SPRY2,TACC3
GO:0006996	organelle organization	54	3131	6.03e-10	ENSP00000220429,ENSP00000225927,ENSP00000254810,ENSP00000256442,ENSP00000262105,ENSP00000262291,ENSP00000262375,ENSP00000265056,ENSP00000269143,ENSP00000285968,ENSP00000288207,ENSP00000290158,ENSP00000293288,ENSP00000296503,ENSP00000300035,ENSP00000301072,ENSP00000301633,ENSP00000305480,ENSP00000319992,ENSP00000326550,ENSP00000332706,ENSP00000336799,ENSP00000338814,ENSP00000342434,ENSP00000343535…	ACTB,ACTR1A,AFG3L2,ATP7A,BAG5,BAX,BAZ1B,BIRC5,BRCA1,CCNB1,CCNB2,CDC45,CENPF,DNAJA3,EPB41L4B,FANCA,FEN1,GABPB1,H2AFX,H3F3A,H3F3B,HAUS5,HMGB2,KIAA0101,KIF4A,KPNB1,LMNA,MAPK8,MCM2,MCM4,MECP2,MLH3,NAGLU,NCAPG2,NRF1,NUP205,PAFAH1B1,PAXIP1,PPP1R12A,PTTG1,PURA,RACGAP1,RANBP1,RFC4,SMARCA4,SPRY2,TACC3,TMEM11,TMSB4X,TUBA1B,TUBA1C,USP7,VMP1,WHSC1
GO:0044772	mitotic cell cycle phase transition	16	254	8.95e-09	ENSP00000216122,ENSP00000256442,ENSP00000262105,ENSP00000262300,ENSP00000265056,ENSP00000288207,ENSP00000298048,ENSP00000301633,ENSP00000326550,ENSP00000342307,ENSP00000358921,ENSP00000380378,ENSP00000401564,ENSP00000405726,ENSP00000439056,ENSP00000479266	ACTR1A,BIRC5,BORA,CCNB1,CCNB2,CDC45,FOXM1,HAUS5,MCM2,MCM4,MCM5,MELK,PAFAH1B1,PKMYT1,RANBP1,TACC3
GO:0043170	macromolecule metabolic process	85	7453	1.16e-08	ENSP00000017003,ENSP00000171111,ENSP00000216122,ENSP00000220003,ENSP00000220429,ENSP00000225927,ENSP00000242257,ENSP00000254654,ENSP00000254810,ENSP00000256442,ENSP00000262027,ENSP00000262105,ENSP00000262300,ENSP00000262375,ENSP00000262948,ENSP00000264595,ENSP00000265056,ENSP00000265753,ENSP00000269143,ENSP00000282388,ENSP00000285968,ENSP00000288207,ENSP00000290158,ENSP00000293288,ENSP00000296102…	ACTB,AFG3L2,AGA,ATP7A,B4GALT2,BAX,BAZ1B,BIRC5,BRCA1,BRF1,CCNB1,CCNB2,CDC45,CENPF,CSK,CTSE,CXCR2,DCUN1D2,DNAJA3,EEF1G,EIF4H,EPHA5,FANCA,FEN1,FOXM1,FTSJ2,GABPB1,GABPB2,GCA,GCNT2,GLRX3,GRIN1,H2AFX,H3F3A,H3F3B,HMGB2,HMMR,HOXC4,ILKAP,KEAP1,KIAA0101,KPNB1,LSM5,MAP2K2,MAPK8,MARS,MCM2,MCM4,MCM5,MECP2,MELK,MET,MLH3,MRPL33,MUC5AC,NAGLU,NCAPG2,NRF1,NUP205,PAXIP1,PHKA1,PKMYT1,PPP1R12A,PTTG1,PURA,RANBP1,RBMX2…
GO:0033044	regulation of chromosome organization	17	313	1.23e-08	ENSP00000254810,ENSP00000256442,ENSP00000265056,ENSP00000301633,ENSP00000305480,ENSP00000326550,ENSP00000343535,ENSP00000355778,ENSP00000355922,ENSP00000357283,ENSP00000357643,ENSP00000377536,ENSP00000378974,ENSP00000384048,ENSP00000395535,ENSP00000405726,ENSP00000418960	BIRC5,BRCA1,CCNB1,CDC45,CENPF,FEN1,H3F3A,H3F3B,LMNA,MAPK8,MCM2,MECP2,MKI67,PAXIP1,PTTG1,TACC3,USP7
GO:0044237	cellular metabolic process	93	8797	1.57e-08	ENSP00000017003,ENSP00000171111,ENSP00000216122,ENSP00000217426,ENSP00000220003,ENSP00000220429,ENSP00000242257,ENSP00000254654,ENSP00000254810,ENSP00000256442,ENSP00000256682,ENSP00000262027,ENSP00000262105,ENSP00000262291,ENSP00000262300,ENSP00000262302,ENSP00000262375,ENSP00000262948,ENSP00000264595,ENSP00000265056,ENSP00000265753,ENSP00000269143,ENSP00000282388,ENSP00000288207,ENSP00000290158…	ABHD6,ACTB,AFG3L2,AGA,AHCY,AK1,ARF3,ATP7A,B4GALT2,BAX,BAZ1B,BIRC5,BRCA1,BRF1,CCNB1,CCNB2,CDC45,CENPF,CSK,CXCR2,DCUN1D2,DNAJA3,ECHS1,EEF1G,EIF4H,EPHA5,FANCA,FEN1,FH,FOXM1,FTSJ2,GABPB1,GABPB2,GCNT2,GLRX3,GRIN1,H2AFX,H3F3A,H3F3B,HMGB2,HMMR,HOXC4,ILKAP,KEAP1,KIAA0101,KPNB1,LSM5,MAP2K2,MAPK8,MARS,MCM2,MCM4,MCM5,MECP2,MELK,MET,MLH3,MRPL33,MUC5AC,NCAPG2,NRF1,NUBP2,PAFAH1B1,PAXIP1,PDE4C,PDHA1,PHKA1,PKMYT…
GO:0071704	organic substance metabolic process	95	9135	1.57e-08	ENSP00000017003,ENSP00000171111,ENSP00000216122,ENSP00000217426,ENSP00000220003,ENSP00000220429,ENSP00000225927,ENSP00000242257,ENSP00000254654,ENSP00000254810,ENSP00000256442,ENSP00000256682,ENSP00000262027,ENSP00000262105,ENSP00000262300,ENSP00000262375,ENSP00000262948,ENSP00000264595,ENSP00000265056,ENSP00000265753,ENSP00000269143,ENSP00000282388,ENSP00000285968,ENSP00000288207,ENSP00000290158…	ABHD6,ACTB,AFG3L2,AGA,AHCY,AK1,ARF3,ATP7A,B4GALT2,BAX,BAZ1B,BIRC5,BRCA1,BRF1,CCNB1,CCNB2,CDC45,CENPF,CSK,CTSE,CXCR2,DCUN1D2,DNAJA3,ECHS1,EEF1G,EIF4H,EPHA5,FANCA,FEN1,FH,FOXM1,FTSJ2,GABPB1,GABPB2,GCA,GCNT2,GLRX3,GRIN1,H2AFX,H3F3A,H3F3B,HMGB2,HMMR,HOXC4,ILKAP,KEAP1,KIAA0101,KPNB1,LSM5,MAP2K2,MAPK8,MARS,MCM2,MCM4,MCM5,MECP2,MELK,MET,MLH3,MRPL33,MUC5AC,NAGLU,NCAPG2,NRF1,NUP205,PAFAH1B1,PAXIP1,PDE4C,P…
GO:0044260	cellular macromolecule metabolic process	77	6413	1.91e-08	ENSP00000017003,ENSP00000171111,ENSP00000216122,ENSP00000220003,ENSP00000220429,ENSP00000242257,ENSP00000254654,ENSP00000254810,ENSP00000256442,ENSP00000262027,ENSP00000262105,ENSP00000262300,ENSP00000262375,ENSP00000262948,ENSP00000264595,ENSP00000265056,ENSP00000265753,ENSP00000269143,ENSP00000282388,ENSP00000288207,ENSP00000290158,ENSP00000293288,ENSP00000296102,ENSP00000296503,ENSP00000298048…	ACTB,AFG3L2,AGA,ATP7A,B4GALT2,BAX,BAZ1B,BIRC5,BRCA1,BRF1,CCNB1,CCNB2,CDC45,CENPF,CSK,CXCR2,DCUN1D2,DNAJA3,EEF1G,EIF4H,EPHA5,FANCA,FEN1,FOXM1,FTSJ2,GABPB1,GABPB2,GCNT2,GRIN1,H2AFX,H3F3A,H3F3B,HMGB2,HOXC4,ILKAP,KEAP1,KIAA0101,KPNB1,LSM5,MAP2K2,MAPK8,MARS,MCM2,MCM4,MCM5,MECP2,MELK,MET,MLH3,MRPL33,MUC5AC,NCAPG2,NRF1,PAXIP1,PHKA1,PKMYT1,PPP1R12A,PTTG1,PURA,RANBP1,RFC4,RNF130,RPL39,RPL9,RPLP0,RPS26,SBF…
GO:0008152	metabolic process	97	9569	2.53e-08	ENSP00000017003,ENSP00000171111,ENSP00000216122,ENSP00000217426,ENSP00000220003,ENSP00000220429,ENSP00000225927,ENSP00000242257,ENSP00000254654,ENSP00000254810,ENSP00000256442,ENSP00000256682,ENSP00000262027,ENSP00000262105,ENSP00000262291,ENSP00000262300,ENSP00000262302,ENSP00000262375,ENSP00000262948,ENSP00000264595,ENSP00000265056,ENSP00000265753,ENSP00000269143,ENSP00000282388,ENSP00000285968…	ABHD6,ACTB,AFG3L2,AGA,AHCY,AK1,ARF3,ATP7A,B4GALT2,BAX,BAZ1B,BIRC5,BRCA1,BRF1,CCNB1,CCNB2,CDC45,CENPF,CSK,CTSE,CXCR2,DCUN1D2,DNAJA3,ECHS1,EEF1G,EIF4H,EPHA5,FANCA,FEN1,FH,FOXM1,FTSJ2,GABPB1,GABPB2,GCA,GCNT2,GLRX3,GRIN1,H2AFX,H3F3A,H3F3B,HMGB2,HMMR,HOXC4,ILKAP,KEAP1,KIAA0101,KPNB1,LSM5,MAP2K2,MAPK8,MARS,MCM2,MCM4,MCM5,MECP2,MELK,MET,MLH3,MRPL33,MUC5AC,NAGLU,NCAPG2,NRF1,NUBP2,NUP205,PAFAH1B1,PAXIP1,P…
GO:0010564	regulation of cell cycle process	23	684	2.53e-08	ENSP00000256442,ENSP00000262300,ENSP00000282388,ENSP00000293288,ENSP00000301633,ENSP00000305480,ENSP00000326550,ENSP00000342307,ENSP00000355922,ENSP00000357643,ENSP00000358921,ENSP00000377492,ENSP00000377536,ENSP00000380378,ENSP00000384048,ENSP00000395535,ENSP00000401564,ENSP00000404190,ENSP00000405726,ENSP00000415430,ENSP00000418960,ENSP00000439056,ENSP00000479266	ACTR1A,BAX,BIRC5,BORA,BRCA1,CCNB1,CDC45,CENPF,FEN1,FOXM1,GTSE1,HAUS5,HMMR,MECP2,MKI67,PAFAH1B1,PAXIP1,PKMYT1,PTTG1,RACGAP1,RANBP1,TACC3,ZFP36L2
GO:0006807	nitrogen compound metabolic process	89	8349	4.56e-08	ENSP00000017003,ENSP00000171111,ENSP00000216122,ENSP00000217426,ENSP00000220003,ENSP00000220429,ENSP00000225927,ENSP00000242257,ENSP00000254654,ENSP00000254810,ENSP00000256442,ENSP00000262027,ENSP00000262105,ENSP00000262300,ENSP00000262375,ENSP00000262948,ENSP00000264595,ENSP00000265056,ENSP00000265753,ENSP00000269143,ENSP00000282388,ENSP00000288207,ENSP00000290158,ENSP00000293288,ENSP00000296102…	ACTB,AFG3L2,AGA,AHCY,AK1,ATP7A,B4GALT2,BAX,BAZ1B,BIRC5,BRCA1,BRF1,CCNB1,CCNB2,CDC45,CENPF,CSK,CTSE,DCUN1D2,DNAJA3,EEF1G,EIF4H,EPHA5,FANCA,FEN1,FOXM1,FTSJ2,GABPB1,GABPB2,GCA,GCNT2,GLRX3,GRIN1,H2AFX,H3F3A,H3F3B,HMGB2,HMMR,HOXC4,ILKAP,KEAP1,KIAA0101,KPNB1,LSM5,MAP2K2,MAPK8,MARS,MCM2,MCM4,MCM5,MECP2,MELK,MET,MLH3,MRPL33,MUC5AC,NAGLU,NCAPG2,NRF1,PAFAH1B1,PAXIP1,PDE4C,PDHA1,PHKA1,PKMYT1,PPP1R12A,PRPS2,…
GO:0071840	cellular component organization or biogenesis	68	5342	5.29e-08	ENSP00000220003,ENSP00000220429,ENSP00000225927,ENSP00000242257,ENSP00000254810,ENSP00000256442,ENSP00000262105,ENSP00000262291,ENSP00000262302,ENSP00000262375,ENSP00000265056,ENSP00000265753,ENSP00000269143,ENSP00000285968,ENSP00000288207,ENSP00000290158,ENSP00000293288,ENSP00000296102,ENSP00000296503,ENSP00000300035,ENSP00000301072,ENSP00000301633,ENSP00000305480,ENSP00000312981,ENSP00000317272…	ACTB,ACTR1A,AFG3L2,ATP7A,BAG5,BAX,BAZ1B,BIRC5,BRCA1,BRF1,CCNB1,CCNB2,CDC45,CENPF,CSK,DNAJA3,EIF4H,EPB41L4B,EPHA5,FANCA,FEN1,FTSJ2,GABPB1,GCA,GLRX3,GRIN1,H2AFX,H3F3A,H3F3B,HAUS5,HMGB2,KIAA0101,KIF4A,KPNB1,LMNA,MAPK8,MCM2,MCM4,MECP2,MET,MLH3,MRPL33,MYO1C,NAGLU,NCAPG2,NRF1,NUBP2,NUP205,PAFAH1B1,PAXIP1,PPP1R12A,PTTG1,PURA,RACGAP1,RANBP1,RFC4,RPLP0,SMARCA4,SPRY2,TACC3,TMEM11,TMSB4X,TUBA1B,TUBA1C,USP39…
GO:0016043	cellular component organization	66	5163	1.02e-07	ENSP00000220003,ENSP00000220429,ENSP00000225927,ENSP00000254810,ENSP00000256442,ENSP00000262105,ENSP00000262291,ENSP00000262302,ENSP00000262375,ENSP00000265056,ENSP00000265753,ENSP00000269143,ENSP00000285968,ENSP00000288207,ENSP00000290158,ENSP00000293288,ENSP00000296102,ENSP00000296503,ENSP00000300035,ENSP00000301072,ENSP00000301633,ENSP00000305480,ENSP00000312981,ENSP00000317272,ENSP00000319992…	ACTB,ACTR1A,AFG3L2,ATP7A,BAG5,BAX,BAZ1B,BIRC5,BRCA1,BRF1,CCNB1,CCNB2,CDC45,CENPF,CSK,DNAJA3,EIF4H,EPB41L4B,EPHA5,FANCA,FEN1,GABPB1,GCA,GLRX3,GRIN1,H2AFX,H3F3A,H3F3B,HAUS5,HMGB2,KIAA0101,KIF4A,KPNB1,LMNA,MAPK8,MCM2,MCM4,MECP2,MET,MLH3,MRPL33,MYO1C,NAGLU,NCAPG2,NRF1,NUBP2,NUP205,PAFAH1B1,PAXIP1,PPP1R12A,PTTG1,PURA,RACGAP1,RANBP1,RFC4,SMARCA4,SPRY2,TACC3,TMEM11,TMSB4X,TUBA1B,TUBA1C,USP39,USP7,VMP1,W…
GO:0044238	primary metabolic process	91	8808	1.03e-07	ENSP00000017003,ENSP00000171111,ENSP00000216122,ENSP00000217426,ENSP00000220003,ENSP00000220429,ENSP00000242257,ENSP00000254654,ENSP00000254810,ENSP00000256442,ENSP00000256682,ENSP00000262027,ENSP00000262105,ENSP00000262300,ENSP00000262375,ENSP00000262948,ENSP00000264595,ENSP00000265056,ENSP00000265753,ENSP00000269143,ENSP00000282388,ENSP00000288207,ENSP00000290158,ENSP00000293288,ENSP00000296102…	ABHD6,ACTB,AFG3L2,AGA,AHCY,AK1,ARF3,ATP7A,B4GALT2,BAX,BAZ1B,BIRC5,BRCA1,BRF1,CCNB1,CCNB2,CDC45,CENPF,CSK,CTSE,DCUN1D2,DNAJA3,ECHS1,EEF1G,EIF4H,EPHA5,FANCA,FEN1,FH,FOXM1,FTSJ2,GABPB1,GABPB2,GCA,GCNT2,GLRX3,GRIN1,H2AFX,H3F3A,H3F3B,HMGB2,HOXC4,ILKAP,KEAP1,KIAA0101,KPNB1,LSM5,MAP2K2,MAPK8,MARS,MCM2,MCM4,MCM5,MECP2,MELK,MET,MLH3,MRPL33,MUC5AC,NCAPG2,NRF1,PAFAH1B1,PAXIP1,PDE4C,PDHA1,PHKA1,PKMYT1,PPP1R1…
GO:0051726	regulation of cell cycle	28	1129	1.19e-07	ENSP00000256442,ENSP00000262300,ENSP00000262948,ENSP00000282388,ENSP00000288207,ENSP00000293288,ENSP00000300035,ENSP00000301633,ENSP00000305480,ENSP00000326550,ENSP00000342307,ENSP00000349960,ENSP00000355922,ENSP00000357643,ENSP00000358921,ENSP00000377492,ENSP00000377536,ENSP00000380378,ENSP00000384048,ENSP00000395535,ENSP00000401564,ENSP00000404190,ENSP00000405726,ENSP00000415430,ENSP00000418960…	ACTB,ACTR1A,BAX,BIRC5,BORA,BRCA1,CCNB1,CCNB2,CDC45,CENPF,FEN1,FOXM1,GTSE1,H2AFX,HAUS5,HMMR,KIAA0101,MAP2K2,MECP2,MKI67,PAFAH1B1,PAXIP1,PKMYT1,PTTG1,RACGAP1,RANBP1,TACC3,ZFP36L2
GO:0007346	regulation of mitotic cell cycle	20	608	4.59e-07	ENSP00000256442,ENSP00000262300,ENSP00000262948,ENSP00000282388,ENSP00000293288,ENSP00000301633,ENSP00000326550,ENSP00000355922,ENSP00000357643,ENSP00000358921,ENSP00000377492,ENSP00000377536,ENSP00000380378,ENSP00000395535,ENSP00000401564,ENSP00000405726,ENSP00000415430,ENSP00000418960,ENSP00000439056,ENSP00000479266	ACTR1A,BAX,BIRC5,BORA,BRCA1,CCNB1,CDC45,CENPF,GTSE1,HAUS5,HMMR,MAP2K2,MECP2,MKI67,PAFAH1B1,PKMYT1,PTTG1,RANBP1,TACC3,ZFP36L2
GO:0033043	regulation of organelle organization	27	1155	7.92e-07	ENSP00000254810,ENSP00000256442,ENSP00000262300,ENSP00000262948,ENSP00000265056,ENSP00000293288,ENSP00000301633,ENSP00000305480,ENSP00000317272,ENSP00000326550,ENSP00000343535,ENSP00000352834,ENSP00000355778,ENSP00000355922,ENSP00000357283,ENSP00000357643,ENSP00000370010,ENSP00000377536,ENSP00000378974,ENSP00000380378,ENSP00000384048,ENSP00000395535,ENSP00000401564,ENSP00000405726,ENSP00000418960…	BAX,BIRC5,BORA,BRCA1,CCNB1,CDC45,CENPF,EPHA5,FEN1,H3F3A,H3F3B,LMNA,MAP2K2,MAPK8,MCM2,MECP2,MET,MKI67,MYO1C,PAFAH1B1,PAXIP1,PKMYT1,PTTG1,RANBP1,TACC3,TMSB4X,USP7
GO:0000226	microtubule cytoskeleton organization	16	393	1.05e-06	ENSP00000256442,ENSP00000290158,ENSP00000300035,ENSP00000301633,ENSP00000326550,ENSP00000336799,ENSP00000357283,ENSP00000363524,ENSP00000366306,ENSP00000380378,ENSP00000389168,ENSP00000395535,ENSP00000401564,ENSP00000404190,ENSP00000418960,ENSP00000439056	BIRC5,BRCA1,CCNB1,HAUS5,KIAA0101,KIF4A,KPNB1,LMNA,MECP2,PAFAH1B1,PPP1R12A,RACGAP1,RANBP1,SPRY2,TACC3,TUBA1B
GO:0000086	G2/M transition of mitotic cell cycle	10	123	1.75e-06	ENSP00000256442,ENSP00000262300,ENSP00000288207,ENSP00000298048,ENSP00000301633,ENSP00000342307,ENSP00000358921,ENSP00000380378,ENSP00000439056,ENSP00000479266	ACTR1A,BIRC5,BORA,CCNB1,CCNB2,FOXM1,HAUS5,MELK,PAFAH1B1,PKMYT1
GO:0007017	microtubule-based process	19	605	1.95e-06	ENSP00000256442,ENSP00000290158,ENSP00000300035,ENSP00000301072,ENSP00000301633,ENSP00000326550,ENSP00000336799,ENSP00000352834,ENSP00000357283,ENSP00000363524,ENSP00000366306,ENSP00000380378,ENSP00000389168,ENSP00000395535,ENSP00000401564,ENSP00000404190,ENSP00000415430,ENSP00000418960,ENSP00000439056	BIRC5,BRCA1,CCNB1,GTSE1,HAUS5,KIAA0101,KIF4A,KPNB1,LMNA,MECP2,MYO1C,PAFAH1B1,PPP1R12A,RACGAP1,RANBP1,SPRY2,TACC3,TUBA1B,TUBA1C
GO:1902850	microtubule cytoskeleton organization involved in mitosis	9	94	2.27e-06	ENSP00000256442,ENSP00000290158,ENSP00000301633,ENSP00000326550,ENSP00000363524,ENSP00000366306,ENSP00000380378,ENSP00000395535,ENSP00000404190	BIRC5,CCNB1,KIF4A,KPNB1,MECP2,PAFAH1B1,RACGAP1,SPRY2,TACC3
GO:0051276	chromosome organization	24	999	3.04e-06	ENSP00000254810,ENSP00000256442,ENSP00000262105,ENSP00000265056,ENSP00000290158,ENSP00000296503,ENSP00000305480,ENSP00000332706,ENSP00000342434,ENSP00000343535,ENSP00000348020,ENSP00000355778,ENSP00000355922,ENSP00000363524,ENSP00000372351,ENSP00000376272,ENSP00000377536,ENSP00000384048,ENSP00000387007,ENSP00000395535,ENSP00000395654,ENSP00000404190,ENSP00000405726,ENSP00000434024	BAZ1B,CCNB1,CDC45,CENPF,FEN1,H2AFX,H3F3A,H3F3B,HMGB2,KIF4A,KPNB1,MCM2,MCM4,MECP2,MLH3,NCAPG2,PAXIP1,PTTG1,PURA,RACGAP1,RFC4,SMARCA4,USP7,WHSC1
GO:0006259	DNA metabolic process	21	773	3.26e-06	ENSP00000216122,ENSP00000262105,ENSP00000262375,ENSP00000265056,ENSP00000290158,ENSP00000296503,ENSP00000300035,ENSP00000305480,ENSP00000332706,ENSP00000342307,ENSP00000343535,ENSP00000348020,ENSP00000355922,ENSP00000372351,ENSP00000373952,ENSP00000376272,ENSP00000377536,ENSP00000384048,ENSP00000405726,ENSP00000418960,ENSP00000434024	BRCA1,CDC45,CENPF,DNAJA3,FANCA,FEN1,FOXM1,H2AFX,HMGB2,KIAA0101,KPNB1,MCM2,MCM4,MCM5,MLH3,PAXIP1,PTTG1,PURA,RFC4,USP7,WHSC1
GO:0051301	cell division	16	483	1.25e-05	ENSP00000256442,ENSP00000282388,ENSP00000288207,ENSP00000301072,ENSP00000301633,ENSP00000312981,ENSP00000326550,ENSP00000336799,ENSP00000355922,ENSP00000363524,ENSP00000377536,ENSP00000380378,ENSP00000387007,ENSP00000404190,ENSP00000439056,ENSP00000479266	BIRC5,BORA,CCNB1,CCNB2,CENPF,HAUS5,KIF4A,NCAPG2,PAFAH1B1,PTTG1,RACGAP1,TACC3,TUBA1B,TUBA1C,USP39,ZFP36L2
GO:1902749	regulation of cell cycle G2/M phase transition	10	167	2.02e-05	ENSP00000256442,ENSP00000355922,ENSP00000358921,ENSP00000377492,ENSP00000380378,ENSP00000384048,ENSP00000395535,ENSP00000415430,ENSP00000418960,ENSP00000439056	ACTR1A,BRCA1,CCNB1,CENPF,GTSE1,HAUS5,HMMR,MECP2,PAFAH1B1,PAXIP1
GO:1901987	regulation of cell cycle phase transition	14	385	2.57e-05	ENSP00000256442,ENSP00000282388,ENSP00000293288,ENSP00000301633,ENSP00000355922,ENSP00000358921,ENSP00000377492,ENSP00000380378,ENSP00000384048,ENSP00000395535,ENSP00000405726,ENSP00000415430,ENSP00000418960,ENSP00000439056	ACTR1A,BAX,BIRC5,BRCA1,CCNB1,CDC45,CENPF,GTSE1,HAUS5,HMMR,MECP2,PAFAH1B1,PAXIP1,ZFP36L2
GO:0051983	regulation of chromosome segregation	8	97	3.37e-05	ENSP00000256442,ENSP00000301633,ENSP00000305480,ENSP00000326550,ENSP00000355922,ENSP00000357643,ENSP00000377536,ENSP00000404190	BIRC5,CCNB1,CENPF,FEN1,MKI67,PTTG1,RACGAP1,TACC3
GO:1901990	regulation of mitotic cell cycle phase transition	13	351	5.42e-05	ENSP00000256442,ENSP00000282388,ENSP00000293288,ENSP00000301633,ENSP00000355922,ENSP00000358921,ENSP00000377492,ENSP00000380378,ENSP00000395535,ENSP00000405726,ENSP00000415430,ENSP00000418960,ENSP00000439056	ACTR1A,BAX,BIRC5,BRCA1,CCNB1,CDC45,CENPF,GTSE1,HAUS5,HMMR,MECP2,PAFAH1B1,ZFP36L2
GO:0051128	regulation of cellular component organization	35	2306	8.37e-05	ENSP00000220003,ENSP00000254810,ENSP00000256442,ENSP00000262300,ENSP00000262948,ENSP00000265056,ENSP00000293288,ENSP00000301633,ENSP00000305480,ENSP00000317272,ENSP00000320092,ENSP00000326550,ENSP00000338814,ENSP00000342307,ENSP00000343535,ENSP00000345728,ENSP00000352834,ENSP00000355778,ENSP00000355922,ENSP00000357283,ENSP00000357643,ENSP00000360608,ENSP00000366306,ENSP00000370010,ENSP00000377536…	ATP7A,BAG5,BAX,BIRC5,BORA,BRCA1,CCNB1,CDC45,CENPF,CSK,EPHA5,FEN1,FOXM1,GRIN1,H3F3A,H3F3B,LMNA,MAP2K2,MAPK8,MCM2,MECP2,MET,MKI67,MYO1C,PAFAH1B1,PAXIP1,PKMYT1,PTTG1,RANBP1,SH3GL3,SMARCA4,SPRY2,TACC3,TMSB4X,USP7
GO:0006260	DNA replication	10	203	9.50e-05	ENSP00000216122,ENSP00000262105,ENSP00000262375,ENSP00000265056,ENSP00000300035,ENSP00000305480,ENSP00000332706,ENSP00000376272,ENSP00000405726,ENSP00000418960	BRCA1,CDC45,DNAJA3,FEN1,KIAA0101,MCM2,MCM4,MCM5,PURA,RFC4
GO:0006261	DNA-dependent DNA replication	8	114	9.50e-05	ENSP00000216122,ENSP00000262105,ENSP00000262375,ENSP00000265056,ENSP00000305480,ENSP00000332706,ENSP00000376272,ENSP00000405726	CDC45,DNAJA3,FEN1,MCM2,MCM4,MCM5,PURA,RFC4
GO:0007088	regulation of mitotic nuclear division	9	160	0.00011	ENSP00000256442,ENSP00000262300,ENSP00000301633,ENSP00000326550,ENSP00000355922,ENSP00000357643,ENSP00000377536,ENSP00000401564,ENSP00000479266	BIRC5,BORA,CCNB1,CENPF,MKI67,PKMYT1,PTTG1,RANBP1,TACC3
GO:2001251	negative regulation of chromosome organization	8	117	0.00011	ENSP00000254810,ENSP00000265056,ENSP00000301633,ENSP00000355778,ENSP00000355922,ENSP00000377536,ENSP00000395535,ENSP00000418960	BIRC5,BRCA1,CENPF,H3F3A,H3F3B,MCM2,MECP2,PTTG1
GO:0006974	cellular response to DNA damage stimulus	18	749	0.00014	ENSP00000256442,ENSP00000293288,ENSP00000296503,ENSP00000300035,ENSP00000305480,ENSP00000342307,ENSP00000342434,ENSP00000343535,ENSP00000348020,ENSP00000372351,ENSP00000373952,ENSP00000376272,ENSP00000377536,ENSP00000384048,ENSP00000405726,ENSP00000415430,ENSP00000418960,ENSP00000434024	BAX,BAZ1B,BRCA1,CCNB1,CDC45,FANCA,FEN1,FOXM1,GTSE1,H2AFX,HMGB2,KIAA0101,MLH3,PAXIP1,PTTG1,RFC4,USP7,WHSC1
GO:0006997	nucleus organization	8	124	0.00015	ENSP00000254810,ENSP00000256442,ENSP00000285968,ENSP00000288207,ENSP00000296503,ENSP00000355778,ENSP00000357283,ENSP00000380378	CCNB1,CCNB2,H3F3A,H3F3B,HMGB2,LMNA,NUP205,PAFAH1B1
GO:0007051	spindle organization	8	123	0.00015	ENSP00000256442,ENSP00000290158,ENSP00000301633,ENSP00000363524,ENSP00000395535,ENSP00000401564,ENSP00000404190,ENSP00000439056	BIRC5,CCNB1,HAUS5,KIF4A,KPNB1,MECP2,RACGAP1,RANBP1
GO:0006139	nucleobase-containing compound metabolic process	53	4551	0.00017	ENSP00000171111,ENSP00000216122,ENSP00000217426,ENSP00000220429,ENSP00000242257,ENSP00000262027,ENSP00000262105,ENSP00000262375,ENSP00000265056,ENSP00000282388,ENSP00000290158,ENSP00000293288,ENSP00000296503,ENSP00000300035,ENSP00000301633,ENSP00000301740,ENSP00000305480,ENSP00000312981,ENSP00000314129,ENSP00000332706,ENSP00000339090,ENSP00000342307,ENSP00000342434,ENSP00000343535,ENSP00000347689…	AHCY,AK1,BAX,BAZ1B,BIRC5,BRCA1,BRF1,CDC45,CENPF,DNAJA3,FANCA,FEN1,FOXM1,FTSJ2,GABPB1,GABPB2,H2AFX,HMGB2,HOXC4,KEAP1,KIAA0101,KPNB1,LSM5,MARS,MCM2,MCM4,MCM5,MECP2,MLH3,NCAPG2,NRF1,PAXIP1,PDE4C,PDHA1,PRPS2,PTTG1,PURA,RBMX2,RFC4,RPL39,RPL9,RPLP0,RPS26,SMARCA4,SPIB,SRRM2,TAF15,TFE3,THUMPD2,USP39,USP7,WHSC1,ZFP36L2
GO:0009987	cellular process	115	14652	0.00018	ENSP00000017003,ENSP00000171111,ENSP00000216122,ENSP00000217426,ENSP00000220003,ENSP00000220429,ENSP00000225927,ENSP00000242257,ENSP00000254654,ENSP00000254810,ENSP00000256442,ENSP00000256682,ENSP00000262027,ENSP00000262105,ENSP00000262291,ENSP00000262300,ENSP00000262302,ENSP00000262375,ENSP00000262948,ENSP00000264595,ENSP00000265056,ENSP00000265753,ENSP00000269143,ENSP00000282388,ENSP00000285968…	ABHD6,ACTB,ACTR1A,AFG3L2,AGA,AHCY,AK1,ARF3,ATP7A,B4GALT2,BAG5,BAX,BAZ1B,BIRC5,BORA,BRCA1,BRF1,CCNB1,CCNB2,CDC45,CENPF,CSK,CXCR2,DCUN1D2,DNAJA3,ECHS1,EEF1G,EIF4H,EPB41L4B,EPHA5,FANCA,FEN1,FH,FOXM1,FTSJ2,GABPB1,GABPB2,GCA,GCNT2,GHITM,GLRX3,GRIN1,GTSE1,H2AFX,H3F3A,H3F3B,HAUS5,HMGB2,HMMR,HOXC4,ILKAP,KEAP1,KIAA0101,KIF4A,KPNB1,LMNA,LSM5,MAP2K2,MAPK8,MARS,MCM2,MCM4,MCM5,MECP2,MELK,MET,MKI67,MLH3,MRPL33…
GO:0090304	nucleic acid metabolic process	48	3941	0.00019	ENSP00000171111,ENSP00000216122,ENSP00000220429,ENSP00000242257,ENSP00000262027,ENSP00000262105,ENSP00000262375,ENSP00000265056,ENSP00000282388,ENSP00000290158,ENSP00000293288,ENSP00000296503,ENSP00000300035,ENSP00000301633,ENSP00000301740,ENSP00000305480,ENSP00000312981,ENSP00000314129,ENSP00000332706,ENSP00000339090,ENSP00000342307,ENSP00000342434,ENSP00000343535,ENSP00000348020,ENSP00000348849…	BAX,BAZ1B,BIRC5,BRCA1,BRF1,CDC45,CENPF,DNAJA3,FANCA,FEN1,FOXM1,FTSJ2,GABPB1,GABPB2,H2AFX,HMGB2,HOXC4,KEAP1,KIAA0101,KPNB1,LSM5,MARS,MCM2,MCM4,MCM5,MECP2,MLH3,NCAPG2,NRF1,PAXIP1,PTTG1,PURA,RBMX2,RFC4,RPL39,RPL9,RPLP0,RPS26,SMARCA4,SPIB,SRRM2,TAF15,TFE3,THUMPD2,USP39,USP7,WHSC1,ZFP36L2
GO:0006270	DNA replication initiation	5	31	0.00020	ENSP00000216122,ENSP00000262105,ENSP00000265056,ENSP00000332706,ENSP00000405726	CDC45,MCM2,MCM4,MCM5,PURA
GO:0046483	heterocycle metabolic process	54	4716	0.00020	ENSP00000171111,ENSP00000216122,ENSP00000217426,ENSP00000220429,ENSP00000242257,ENSP00000262027,ENSP00000262105,ENSP00000262375,ENSP00000265056,ENSP00000282388,ENSP00000290158,ENSP00000293288,ENSP00000296503,ENSP00000300035,ENSP00000301633,ENSP00000301740,ENSP00000305480,ENSP00000312981,ENSP00000314129,ENSP00000332706,ENSP00000339090,ENSP00000342307,ENSP00000342434,ENSP00000343535,ENSP00000345728…	AHCY,AK1,ATP7A,BAX,BAZ1B,BIRC5,BRCA1,BRF1,CDC45,CENPF,DNAJA3,FANCA,FEN1,FOXM1,FTSJ2,GABPB1,GABPB2,H2AFX,HMGB2,HOXC4,KEAP1,KIAA0101,KPNB1,LSM5,MARS,MCM2,MCM4,MCM5,MECP2,MLH3,NCAPG2,NRF1,PAXIP1,PDE4C,PDHA1,PRPS2,PTTG1,PURA,RBMX2,RFC4,RPL39,RPL9,RPLP0,RPS26,SMARCA4,SPIB,SRRM2,TAF15,TFE3,THUMPD2,USP39,USP7,WHSC1,ZFP36L2
GO:0034641	cellular nitrogen compound metabolic process	57	5126	0.00021	ENSP00000171111,ENSP00000216122,ENSP00000217426,ENSP00000220429,ENSP00000242257,ENSP00000262027,ENSP00000262105,ENSP00000262375,ENSP00000265056,ENSP00000265753,ENSP00000282388,ENSP00000290158,ENSP00000293288,ENSP00000296102,ENSP00000296503,ENSP00000300035,ENSP00000301633,ENSP00000301740,ENSP00000305480,ENSP00000312981,ENSP00000314129,ENSP00000331901,ENSP00000332706,ENSP00000339090,ENSP00000342307…	AHCY,AK1,ATP7A,BAX,BAZ1B,BIRC5,BRCA1,BRF1,CDC45,CENPF,DNAJA3,EEF1G,EIF4H,FANCA,FEN1,FOXM1,FTSJ2,GABPB1,GABPB2,H2AFX,HMGB2,HOXC4,KEAP1,KIAA0101,KPNB1,LSM5,MARS,MCM2,MCM4,MCM5,MECP2,MLH3,MRPL33,NCAPG2,NRF1,PAXIP1,PDE4C,PDHA1,PRPS2,PTTG1,PURA,RBMX2,RFC4,RPL39,RPL9,RPLP0,RPS26,SMARCA4,SPIB,SRRM2,TAF15,TFE3,THUMPD2,USP39,USP7,WHSC1,ZFP36L2
GO:0007010	cytoskeleton organization	20	953	0.00022	ENSP00000256442,ENSP00000290158,ENSP00000300035,ENSP00000301072,ENSP00000301633,ENSP00000326550,ENSP00000336799,ENSP00000349960,ENSP00000357283,ENSP00000363524,ENSP00000363694,ENSP00000366306,ENSP00000370010,ENSP00000380378,ENSP00000389168,ENSP00000395535,ENSP00000401564,ENSP00000404190,ENSP00000418960,ENSP00000439056	ACTB,BIRC5,BRCA1,CCNB1,EPB41L4B,HAUS5,KIAA0101,KIF4A,KPNB1,LMNA,MECP2,PAFAH1B1,PPP1R12A,RACGAP1,RANBP1,SPRY2,TACC3,TMSB4X,TUBA1B,TUBA1C
GO:0044267	cellular protein metabolic process	45	3603	0.00022	ENSP00000171111,ENSP00000220003,ENSP00000254654,ENSP00000254810,ENSP00000256442,ENSP00000262027,ENSP00000262300,ENSP00000262948,ENSP00000264595,ENSP00000265753,ENSP00000269143,ENSP00000282388,ENSP00000288207,ENSP00000296102,ENSP00000298048,ENSP00000301633,ENSP00000310696,ENSP00000312981,ENSP00000317272,ENSP00000331901,ENSP00000342434,ENSP00000343535,ENSP00000345728,ENSP00000348849,ENSP00000349960…	ACTB,AFG3L2,AGA,ATP7A,B4GALT2,BAZ1B,BIRC5,BRCA1,CCNB1,CCNB2,CSK,DCUN1D2,EEF1G,EIF4H,EPHA5,GCNT2,GRIN1,H3F3A,H3F3B,ILKAP,KEAP1,MAP2K2,MAPK8,MARS,MECP2,MELK,MET,MRPL33,MUC5AC,PAXIP1,PHKA1,PKMYT1,PPP1R12A,PTTG1,RANBP1,RNF130,RPL39,RPL9,RPLP0,RPS26,SBF1,USP39,USP7,WHSC1,ZFP36L2
GO:0006725	cellular aromatic compound metabolic process	54	4754	0.00023	ENSP00000171111,ENSP00000216122,ENSP00000217426,ENSP00000220429,ENSP00000242257,ENSP00000262027,ENSP00000262105,ENSP00000262375,ENSP00000265056,ENSP00000282388,ENSP00000290158,ENSP00000293288,ENSP00000296503,ENSP00000300035,ENSP00000301633,ENSP00000301740,ENSP00000305480,ENSP00000312981,ENSP00000314129,ENSP00000332706,ENSP00000339090,ENSP00000342307,ENSP00000342434,ENSP00000343535,ENSP00000345728…	AHCY,AK1,ATP7A,BAX,BAZ1B,BIRC5,BRCA1,BRF1,CDC45,CENPF,DNAJA3,FANCA,FEN1,FOXM1,FTSJ2,GABPB1,GABPB2,H2AFX,HMGB2,HOXC4,KEAP1,KIAA0101,KPNB1,LSM5,MARS,MCM2,MCM4,MCM5,MECP2,MLH3,NCAPG2,NRF1,PAXIP1,PDE4C,PDHA1,PRPS2,PTTG1,PURA,RBMX2,RFC4,RPL39,RPL9,RPLP0,RPS26,SMARCA4,SPIB,SRRM2,TAF15,TFE3,THUMPD2,USP39,USP7,WHSC1,ZFP36L2
GO:0051129	negative regulation of cellular component organization	16	632	0.00023	ENSP00000220003,ENSP00000254810,ENSP00000265056,ENSP00000301633,ENSP00000317272,ENSP00000320092,ENSP00000338814,ENSP00000355778,ENSP00000355922,ENSP00000357283,ENSP00000366306,ENSP00000370010,ENSP00000377536,ENSP00000380378,ENSP00000395535,ENSP00000418960	BAG5,BIRC5,BRCA1,CENPF,CSK,H3F3A,H3F3B,LMNA,MCM2,MECP2,MET,PAFAH1B1,PTTG1,SH3GL3,SPRY2,TMSB4X
GO:1901564	organonitrogen compound metabolic process	58	5281	0.00023	ENSP00000017003,ENSP00000171111,ENSP00000217426,ENSP00000220003,ENSP00000225927,ENSP00000254654,ENSP00000254810,ENSP00000256442,ENSP00000262027,ENSP00000262300,ENSP00000262948,ENSP00000264595,ENSP00000265753,ENSP00000269143,ENSP00000282388,ENSP00000288207,ENSP00000293288,ENSP00000296102,ENSP00000298048,ENSP00000301633,ENSP00000310696,ENSP00000312981,ENSP00000317272,ENSP00000331901,ENSP00000342434…	ACTB,AFG3L2,AGA,AHCY,AK1,ATP7A,B4GALT2,BAX,BAZ1B,BIRC5,BRCA1,CCNB1,CCNB2,CSK,CTSE,DCUN1D2,EEF1G,EIF4H,EPHA5,GCA,GCNT2,GLRX3,GRIN1,H3F3A,H3F3B,HMMR,ILKAP,KEAP1,MAP2K2,MAPK8,MARS,MECP2,MELK,MET,MRPL33,MUC5AC,NAGLU,PAFAH1B1,PAXIP1,PDE4C,PDHA1,PHKA1,PKMYT1,PPP1R12A,PRPS2,PTTG1,RANBP1,RNF130,RPL39,RPL9,RPLP0,RPS26,SBF1,USP39,USP7,WHSC1,XYLT2,ZFP36L2
GO:0006281	DNA repair	14	491	0.00024	ENSP00000296503,ENSP00000300035,ENSP00000305480,ENSP00000342307,ENSP00000343535,ENSP00000348020,ENSP00000372351,ENSP00000373952,ENSP00000376272,ENSP00000377536,ENSP00000384048,ENSP00000405726,ENSP00000418960,ENSP00000434024	BRCA1,CDC45,FANCA,FEN1,FOXM1,H2AFX,HMGB2,KIAA0101,MLH3,PAXIP1,PTTG1,RFC4,USP7,WHSC1
GO:0009893	positive regulation of metabolic process	42	3280	0.00025	ENSP00000171111,ENSP00000220003,ENSP00000220429,ENSP00000256442,ENSP00000262027,ENSP00000262375,ENSP00000262948,ENSP00000282388,ENSP00000293288,ENSP00000296503,ENSP00000314129,ENSP00000317272,ENSP00000342307,ENSP00000342434,ENSP00000343535,ENSP00000345728,ENSP00000349960,ENSP00000352834,ENSP00000357283,ENSP00000357914,ENSP00000360608,ENSP00000363694,ENSP00000366306,ENSP00000368917,ENSP00000370010…	ABHD6,ACTB,ATP7A,BAX,BAZ1B,BRCA1,BRF1,CCNB1,CSK,DCUN1D2,DNAJA3,EPB41L4B,FOXM1,GABPB1,GABPB2,GCNT2,GRIN1,H2AFX,HMGB2,HOXC4,KEAP1,LMNA,MAP2K2,MAPK8,MARS,MECP2,MET,MYO1C,NCAPG2,NRF1,PAXIP1,PPP1R12A,RFC4,SMARCA4,SPIB,SPRY2,TAF15,TFE3,TMSB4X,USP7,WHSC1,ZFP36L2
GO:0034645	cellular macromolecule biosynthetic process	44	3518	0.00025	ENSP00000017003,ENSP00000171111,ENSP00000216122,ENSP00000220429,ENSP00000262027,ENSP00000262105,ENSP00000262375,ENSP00000265056,ENSP00000265753,ENSP00000293288,ENSP00000296102,ENSP00000296503,ENSP00000300035,ENSP00000301633,ENSP00000305480,ENSP00000310696,ENSP00000314129,ENSP00000331901,ENSP00000332706,ENSP00000342307,ENSP00000342434,ENSP00000345728,ENSP00000348849,ENSP00000355315,ENSP00000355922…	ATP7A,B4GALT2,BAX,BAZ1B,BIRC5,BRCA1,BRF1,CDC45,CENPF,DNAJA3,EEF1G,EIF4H,FEN1,FOXM1,GABPB1,GABPB2,GCNT2,HMGB2,HOXC4,KEAP1,KIAA0101,MARS,MCM2,MCM4,MCM5,MECP2,MRPL33,MUC5AC,NCAPG2,NRF1,PAXIP1,PTTG1,PURA,RFC4,RPL39,RPL9,RPLP0,RPS26,SMARCA4,SPIB,TAF15,TFE3,WHSC1,XYLT2
GO:0010468	regulation of gene expression	52	4533	0.00027	ENSP00000171111,ENSP00000220429,ENSP00000254810,ENSP00000256442,ENSP00000262027,ENSP00000262375,ENSP00000262948,ENSP00000265753,ENSP00000282388,ENSP00000296503,ENSP00000301633,ENSP00000314129,ENSP00000317272,ENSP00000332706,ENSP00000342307,ENSP00000342434,ENSP00000343535,ENSP00000345728,ENSP00000348849,ENSP00000349960,ENSP00000352834,ENSP00000355315,ENSP00000355778,ENSP00000355922,ENSP00000357283…	ACTB,ATP7A,BAZ1B,BCL7A,BIRC5,BRCA1,BRF1,CCNB1,CDC45,CENPF,DNAJA3,EIF4H,EPB41L4B,EPHA5,FANCA,FOXM1,GABPB1,GABPB2,GCNT2,GRIN1,H2AFX,H3F3A,H3F3B,HMGB2,HOXC4,KEAP1,LMNA,LSM5,MAP2K2,MAPK8,MARS,MECP2,MET,MYO1C,NRF1,PAXIP1,PPP1R12A,PTTG1,PURA,RPL39,RPL9,RPLP0,RPS26,SMARCA4,SPIB,SPRY2,TAF15,TFE3,TMSB4X,USP7,WHSC1,ZFP36L2
GO:0019538	protein metabolic process	49	4194	0.00035	ENSP00000017003,ENSP00000171111,ENSP00000220003,ENSP00000254654,ENSP00000254810,ENSP00000256442,ENSP00000262027,ENSP00000262300,ENSP00000262948,ENSP00000264595,ENSP00000265753,ENSP00000269143,ENSP00000282388,ENSP00000288207,ENSP00000296102,ENSP00000298048,ENSP00000301633,ENSP00000310696,ENSP00000312981,ENSP00000317272,ENSP00000331901,ENSP00000342434,ENSP00000343535,ENSP00000345728,ENSP00000348849…	ACTB,AFG3L2,AGA,ATP7A,B4GALT2,BAZ1B,BIRC5,BRCA1,CCNB1,CCNB2,CSK,CTSE,DCUN1D2,EEF1G,EIF4H,EPHA5,GCA,GCNT2,GLRX3,GRIN1,H3F3A,H3F3B,ILKAP,KEAP1,MAP2K2,MAPK8,MARS,MECP2,MELK,MET,MRPL33,MUC5AC,PAXIP1,PHKA1,PKMYT1,PPP1R12A,PTTG1,RANBP1,RNF130,RPL39,RPL9,RPLP0,RPS26,SBF1,USP39,USP7,WHSC1,XYLT2,ZFP36L2
GO:0010389	regulation of G2/M transition of mitotic cell cycle	8	149	0.00037	ENSP00000256442,ENSP00000355922,ENSP00000358921,ENSP00000377492,ENSP00000380378,ENSP00000395535,ENSP00000418960,ENSP00000439056	ACTR1A,BRCA1,CCNB1,CENPF,HAUS5,HMMR,MECP2,PAFAH1B1
GO:0071103	DNA conformation change	10	257	0.00041	ENSP00000254810,ENSP00000256442,ENSP00000262105,ENSP00000265056,ENSP00000296503,ENSP00000332706,ENSP00000355778,ENSP00000387007,ENSP00000405726,ENSP00000434024	CCNB1,CDC45,H2AFX,H3F3A,H3F3B,HMGB2,MCM2,MCM4,NCAPG2,PURA
GO:0007052	mitotic spindle organization	6	70	0.00043	ENSP00000256442,ENSP00000290158,ENSP00000301633,ENSP00000363524,ENSP00000395535,ENSP00000404190	BIRC5,CCNB1,KIF4A,KPNB1,MECP2,RACGAP1
GO:0051054	positive regulation of DNA metabolic process	9	209	0.00052	ENSP00000293288,ENSP00000342307,ENSP00000343535,ENSP00000372351,ENSP00000376272,ENSP00000384048,ENSP00000395535,ENSP00000418960,ENSP00000434024	BAX,BRCA1,FOXM1,H2AFX,MECP2,PAXIP1,RFC4,USP7,WHSC1
GO:0010639	negative regulation of organelle organization	11	333	0.00060	ENSP00000254810,ENSP00000265056,ENSP00000301633,ENSP00000317272,ENSP00000355778,ENSP00000355922,ENSP00000357283,ENSP00000370010,ENSP00000377536,ENSP00000395535,ENSP00000418960	BIRC5,BRCA1,CENPF,H3F3A,H3F3B,LMNA,MCM2,MECP2,MET,PTTG1,TMSB4X
GO:0033045	regulation of sister chromatid segregation	6	75	0.00060	ENSP00000256442,ENSP00000301633,ENSP00000305480,ENSP00000326550,ENSP00000355922,ENSP00000377536	BIRC5,CCNB1,CENPF,FEN1,PTTG1,TACC3
GO:0060623	regulation of chromosome condensation	3	5	0.00061	ENSP00000254810,ENSP00000256442,ENSP00000355778	CCNB1,H3F3A,H3F3B
GO:0090068	positive regulation of cell cycle process	10	273	0.00062	ENSP00000256442,ENSP00000293288,ENSP00000301633,ENSP00000305480,ENSP00000395535,ENSP00000401564,ENSP00000404190,ENSP00000405726,ENSP00000415430,ENSP00000418960	BAX,BIRC5,BRCA1,CCNB1,CDC45,FEN1,GTSE1,MECP2,RACGAP1,RANBP1
GO:0044249	cellular biosynthetic process	51	4567	0.00065	ENSP00000017003,ENSP00000171111,ENSP00000216122,ENSP00000217426,ENSP00000220429,ENSP00000256682,ENSP00000262027,ENSP00000262105,ENSP00000262375,ENSP00000265056,ENSP00000265753,ENSP00000293288,ENSP00000296102,ENSP00000296503,ENSP00000300035,ENSP00000301633,ENSP00000305480,ENSP00000310696,ENSP00000314129,ENSP00000331901,ENSP00000332706,ENSP00000342307,ENSP00000342434,ENSP00000345728,ENSP00000347689…	AHCY,AK1,ARF3,ATP7A,B4GALT2,BAX,BAZ1B,BIRC5,BRCA1,BRF1,CDC45,CENPF,DNAJA3,EEF1G,EIF4H,FEN1,FOXM1,GABPB1,GABPB2,GCNT2,HMGB2,HOXC4,KEAP1,KIAA0101,MARS,MCM2,MCM4,MCM5,MECP2,MRPL33,MUC5AC,NCAPG2,NRF1,PAXIP1,PDE4C,PDHA1,PRPS2,PTTG1,PURA,RFC4,RPL39,RPL9,RPLP0,RPS26,SBF1,SMARCA4,SPIB,TAF15,TFE3,WHSC1,XYLT2
GO:1901360	organic cyclic compound metabolic process	54	4963	0.00065	ENSP00000171111,ENSP00000216122,ENSP00000217426,ENSP00000220429,ENSP00000242257,ENSP00000262027,ENSP00000262105,ENSP00000262375,ENSP00000265056,ENSP00000282388,ENSP00000290158,ENSP00000293288,ENSP00000296503,ENSP00000300035,ENSP00000301633,ENSP00000301740,ENSP00000305480,ENSP00000312981,ENSP00000314129,ENSP00000332706,ENSP00000339090,ENSP00000342307,ENSP00000342434,ENSP00000343535,ENSP00000345728…	AHCY,AK1,ATP7A,BAX,BAZ1B,BIRC5,BRCA1,BRF1,CDC45,CENPF,DNAJA3,FANCA,FEN1,FOXM1,FTSJ2,GABPB1,GABPB2,H2AFX,HMGB2,HOXC4,KEAP1,KIAA0101,KPNB1,LSM5,MARS,MCM2,MCM4,MCM5,MECP2,MLH3,NCAPG2,NRF1,PAXIP1,PDE4C,PDHA1,PRPS2,PTTG1,PURA,RBMX2,RFC4,RPL39,RPL9,RPLP0,RPS26,SMARCA4,SPIB,SRRM2,TAF15,TFE3,THUMPD2,USP39,USP7,WHSC1,ZFP36L2
GO:0010604	positive regulation of macromolecule metabolic process	39	3081	0.00067	ENSP00000171111,ENSP00000220003,ENSP00000220429,ENSP00000256442,ENSP00000262027,ENSP00000262375,ENSP00000262948,ENSP00000282388,ENSP00000293288,ENSP00000296503,ENSP00000314129,ENSP00000317272,ENSP00000342307,ENSP00000342434,ENSP00000343535,ENSP00000349960,ENSP00000352834,ENSP00000357283,ENSP00000357914,ENSP00000360608,ENSP00000363694,ENSP00000366306,ENSP00000368917,ENSP00000372351,ENSP00000376272…	ACTB,BAX,BAZ1B,BRCA1,BRF1,CCNB1,CSK,DCUN1D2,DNAJA3,EPB41L4B,FOXM1,GABPB1,GABPB2,GCNT2,GRIN1,H2AFX,HMGB2,HOXC4,KEAP1,LMNA,MAP2K2,MAPK8,MARS,MECP2,MET,MYO1C,NCAPG2,NRF1,PAXIP1,PPP1R12A,RFC4,SMARCA4,SPIB,SPRY2,TAF15,TFE3,USP7,WHSC1,ZFP36L2
GO:0065004	protein-DNA complex assembly	9	223	0.00076	ENSP00000254810,ENSP00000265056,ENSP00000296503,ENSP00000355778,ENSP00000355922,ENSP00000395654,ENSP00000405726,ENSP00000434024,ENSP00000448323	BRF1,CDC45,CENPF,H2AFX,H3F3A,H3F3B,HMGB2,MCM2,SMARCA4
GO:0030330	DNA damage response, signal transduction by p53 class mediator	6	82	0.00086	ENSP00000256442,ENSP00000293288,ENSP00000342307,ENSP00000384048,ENSP00000415430,ENSP00000418960	BAX,BRCA1,CCNB1,FOXM1,GTSE1,PAXIP1
GO:0045935	positive regulation of nucleobase-containing compound metabolic process	27	1770	0.00086	ENSP00000220429,ENSP00000256442,ENSP00000262027,ENSP00000262948,ENSP00000282388,ENSP00000293288,ENSP00000296503,ENSP00000314129,ENSP00000317272,ENSP00000342307,ENSP00000343535,ENSP00000357914,ENSP00000360608,ENSP00000370010,ENSP00000372351,ENSP00000376272,ENSP00000376924,ENSP00000384048,ENSP00000389168,ENSP00000395535,ENSP00000395654,ENSP00000399808,ENSP00000418960,ENSP00000434024,ENSP00000448323…	BAX,BRCA1,BRF1,CCNB1,FOXM1,GABPB1,GABPB2,GRIN1,H2AFX,HMGB2,HOXC4,MAP2K2,MARS,MECP2,MET,NRF1,PAXIP1,PPP1R12A,RFC4,SMARCA4,SPIB,TAF15,TFE3,TMSB4X,USP7,WHSC1,ZFP36L2
GO:0048518	positive regulation of biological process	57	5459	0.0010	ENSP00000171111,ENSP00000220003,ENSP00000220429,ENSP00000254810,ENSP00000256442,ENSP00000262027,ENSP00000262375,ENSP00000262948,ENSP00000282388,ENSP00000293288,ENSP00000296503,ENSP00000298048,ENSP00000301633,ENSP00000305480,ENSP00000314129,ENSP00000317272,ENSP00000319635,ENSP00000320092,ENSP00000332706,ENSP00000342307,ENSP00000342434,ENSP00000343535,ENSP00000345728,ENSP00000349960,ENSP00000352834…	ABHD6,ACTB,ATP7A,BAX,BAZ1B,BIRC5,BRCA1,BRF1,CCNB1,CDC45,CSK,CXCR2,DCUN1D2,DNAJA3,EPB41L4B,EPHA5,FEN1,FOXM1,GABPB1,GABPB2,GCNT2,GRIN1,GTSE1,H2AFX,H3F3A,H3F3B,HMGB2,HOXC4,KEAP1,LMNA,MAP2K2,MAPK8,MARS,MECP2,MELK,MET,MUC5AC,MYO1C,NCAPG2,NRF1,PAFAH1B1,PAXIP1,PPP1R12A,PURA,RACGAP1,RANBP1,RFC4,SH3GL3,SMARCA4,SPIB,SPRY2,TAF15,TFE3,TMSB4X,USP7,WHSC1,ZFP36L2
GO:1901576	organic substance biosynthetic process	51	4656	0.0010	ENSP00000017003,ENSP00000171111,ENSP00000216122,ENSP00000217426,ENSP00000220429,ENSP00000256682,ENSP00000262027,ENSP00000262105,ENSP00000262375,ENSP00000265056,ENSP00000265753,ENSP00000293288,ENSP00000296102,ENSP00000296503,ENSP00000300035,ENSP00000301633,ENSP00000305480,ENSP00000310696,ENSP00000314129,ENSP00000331901,ENSP00000332706,ENSP00000342307,ENSP00000342434,ENSP00000345728,ENSP00000347689…	AHCY,AK1,ARF3,ATP7A,B4GALT2,BAX,BAZ1B,BIRC5,BRCA1,BRF1,CDC45,CENPF,DNAJA3,EEF1G,EIF4H,FEN1,FOXM1,GABPB1,GABPB2,GCNT2,HMGB2,HOXC4,KEAP1,KIAA0101,MARS,MCM2,MCM4,MCM5,MECP2,MRPL33,MUC5AC,NCAPG2,NRF1,PAXIP1,PDE4C,PDHA1,PRPS2,PTTG1,PURA,RFC4,RPL39,RPL9,RPLP0,RPS26,SBF1,SMARCA4,SPIB,TAF15,TFE3,WHSC1,XYLT2
GO:0048232	male gamete generation	13	507	0.0011	ENSP00000254810,ENSP00000256442,ENSP00000293288,ENSP00000296503,ENSP00000348020,ENSP00000355778,ENSP00000358921,ENSP00000370196,ENSP00000373952,ENSP00000377536,ENSP00000380378,ENSP00000404190,ENSP00000434024	ACTR1A,BAX,CCNB1,FANCA,H2AFX,H3F3A,H3F3B,HMGB2,MLH3,PAFAH1B1,PTTG1,RACGAP1,SBF1
GO:0010965	regulation of mitotic sister chromatid separation	5	53	0.0013	ENSP00000256442,ENSP00000301633,ENSP00000326550,ENSP00000355922,ENSP00000377536	BIRC5,CCNB1,CENPF,PTTG1,TACC3
GO:0060255	regulation of macromolecule metabolic process	61	6072	0.0013	ENSP00000171111,ENSP00000220003,ENSP00000220429,ENSP00000254810,ENSP00000256442,ENSP00000262027,ENSP00000262300,ENSP00000262375,ENSP00000262948,ENSP00000265753,ENSP00000282388,ENSP00000293288,ENSP00000296503,ENSP00000301633,ENSP00000314129,ENSP00000317272,ENSP00000332706,ENSP00000338814,ENSP00000342307,ENSP00000342434,ENSP00000343535,ENSP00000345728,ENSP00000348849,ENSP00000349960,ENSP00000352834…	ACTB,ATP7A,BAG5,BAX,BAZ1B,BCL7A,BIRC5,BRCA1,BRF1,CCNB1,CDC45,CENPF,CSK,DCUN1D2,DNAJA3,EIF4H,EPB41L4B,EPHA5,FANCA,FOXM1,GABPB1,GABPB2,GCNT2,GRIN1,H2AFX,H3F3A,H3F3B,HMGB2,HOXC4,KEAP1,LMNA,LSM5,MAP2K2,MAPK8,MARS,MECP2,MET,MYO1C,NCAPG2,NRF1,PAFAH1B1,PAXIP1,PKMYT1,PPP1R12A,PTTG1,PURA,RFC4,RGS3,RPL39,RPL9,RPLP0,RPS26,SMARCA4,SPIB,SPRY2,TAF15,TFE3,TMSB4X,USP7,WHSC1,ZFP36L2
GO:0006268	DNA unwinding involved in DNA replication	3	8	0.0014	ENSP00000262105,ENSP00000265056,ENSP00000332706	MCM2,MCM4,PURA
GO:0010628	positive regulation of gene expression	27	1826	0.0014	ENSP00000220429,ENSP00000256442,ENSP00000262027,ENSP00000262948,ENSP00000296503,ENSP00000314129,ENSP00000317272,ENSP00000342307,ENSP00000342434,ENSP00000349960,ENSP00000352834,ENSP00000357283,ENSP00000357914,ENSP00000360608,ENSP00000363694,ENSP00000366306,ENSP00000376924,ENSP00000378974,ENSP00000384048,ENSP00000389168,ENSP00000395535,ENSP00000395654,ENSP00000399808,ENSP00000418960,ENSP00000448323…	ACTB,BAZ1B,BRCA1,BRF1,CCNB1,EPB41L4B,FOXM1,GABPB1,GABPB2,GRIN1,HMGB2,HOXC4,LMNA,MAP2K2,MAPK8,MARS,MECP2,MET,MYO1C,NRF1,PAXIP1,PPP1R12A,SMARCA4,SPIB,SPRY2,TAF15,TFE3
GO:0045787	positive regulation of cell cycle	11	376	0.0014	ENSP00000256442,ENSP00000293288,ENSP00000301633,ENSP00000305480,ENSP00000380378,ENSP00000395535,ENSP00000401564,ENSP00000404190,ENSP00000405726,ENSP00000415430,ENSP00000418960	BAX,BIRC5,BRCA1,CCNB1,CDC45,FEN1,GTSE1,MECP2,PAFAH1B1,RACGAP1,RANBP1
GO:0000075	cell cycle checkpoint	8	193	0.0016	ENSP00000256442,ENSP00000293288,ENSP00000301633,ENSP00000355922,ENSP00000405726,ENSP00000415430,ENSP00000418960,ENSP00000434024	BAX,BIRC5,BRCA1,CCNB1,CDC45,CENPF,GTSE1,H2AFX
GO:0007059	chromosome segregation	9	253	0.0017	ENSP00000256442,ENSP00000290158,ENSP00000301633,ENSP00000348020,ENSP00000355922,ENSP00000363524,ENSP00000377536,ENSP00000404190,ENSP00000418960	BIRC5,BRCA1,CCNB1,CENPF,KIF4A,KPNB1,MLH3,PTTG1,RACGAP1
GO:0048522	positive regulation of cellular process	52	4898	0.0017	ENSP00000171111,ENSP00000220003,ENSP00000220429,ENSP00000254810,ENSP00000256442,ENSP00000262027,ENSP00000262375,ENSP00000262948,ENSP00000282388,ENSP00000293288,ENSP00000296503,ENSP00000298048,ENSP00000301633,ENSP00000305480,ENSP00000314129,ENSP00000317272,ENSP00000319635,ENSP00000320092,ENSP00000332706,ENSP00000342307,ENSP00000343535,ENSP00000345728,ENSP00000352834,ENSP00000355778,ENSP00000357283…	ATP7A,BAX,BIRC5,BRCA1,BRF1,CCNB1,CDC45,CSK,CXCR2,DCUN1D2,DNAJA3,EPB41L4B,FEN1,FOXM1,GABPB1,GABPB2,GCNT2,GRIN1,GTSE1,H2AFX,H3F3A,H3F3B,HMGB2,HOXC4,KEAP1,LMNA,MAP2K2,MAPK8,MARS,MECP2,MELK,MET,MYO1C,NCAPG2,NRF1,PAFAH1B1,PAXIP1,PPP1R12A,PURA,RACGAP1,RANBP1,RFC4,SH3GL3,SMARCA4,SPIB,SPRY2,TAF15,TFE3,TMSB4X,USP7,WHSC1,ZFP36L2
GO:0034655	nucleobase-containing compound catabolic process	11	394	0.0020	ENSP00000217426,ENSP00000282388,ENSP00000290158,ENSP00000296503,ENSP00000305480,ENSP00000347689,ENSP00000348849,ENSP00000355315,ENSP00000400467,ENSP00000410758,ENSP00000449328	AHCY,FEN1,HMGB2,KPNB1,LSM5,PDE4C,RPL39,RPL9,RPLP0,RPS26,ZFP36L2
GO:0032392	DNA geometric change	5	63	0.0024	ENSP00000262105,ENSP00000265056,ENSP00000296503,ENSP00000332706,ENSP00000405726	CDC45,HMGB2,MCM2,MCM4,PURA
GO:0019222	regulation of metabolic process	63	6516	0.0026	ENSP00000171111,ENSP00000220003,ENSP00000220429,ENSP00000254810,ENSP00000256442,ENSP00000262027,ENSP00000262300,ENSP00000262375,ENSP00000262948,ENSP00000265753,ENSP00000282388,ENSP00000290158,ENSP00000293288,ENSP00000296503,ENSP00000301633,ENSP00000314129,ENSP00000317272,ENSP00000332706,ENSP00000338814,ENSP00000342307,ENSP00000342434,ENSP00000343535,ENSP00000345728,ENSP00000348849,ENSP00000349960…	ABHD6,ACTB,ATP7A,BAG5,BAX,BAZ1B,BCL7A,BIRC5,BRCA1,BRF1,CCNB1,CDC45,CENPF,CSK,DCUN1D2,DNAJA3,EIF4H,EPB41L4B,EPHA5,FANCA,FOXM1,GABPB1,GABPB2,GCNT2,GRIN1,H2AFX,H3F3A,H3F3B,HMGB2,HOXC4,KEAP1,KPNB1,LMNA,LSM5,MAP2K2,MAPK8,MARS,MECP2,MET,MYO1C,NCAPG2,NRF1,PAFAH1B1,PAXIP1,PKMYT1,PPP1R12A,PTTG1,PURA,RFC4,RGS3,RPL39,RPL9,RPLP0,RPS26,SMARCA4,SPIB,SPRY2,TAF15,TFE3,TMSB4X,USP7,WHSC1,ZFP36L2
GO:0051649	establishment of localization in cell	24	1616	0.0031	ENSP00000237163,ENSP00000256442,ENSP00000261558,ENSP00000285968,ENSP00000290158,ENSP00000293288,ENSP00000301072,ENSP00000301633,ENSP00000336799,ENSP00000339090,ENSP00000348849,ENSP00000352834,ENSP00000354742,ENSP00000355315,ENSP00000355922,ENSP00000357283,ENSP00000358921,ENSP00000360608,ENSP00000363524,ENSP00000366306,ENSP00000380378,ENSP00000400467,ENSP00000401564,ENSP00000449328	ACTR1A,AP5M1,BAX,BIRC5,CCNB1,CENPF,DOPEY1,GRIN1,IPO9,KIF4A,KPNB1,LMNA,MYO1C,NUP205,PAFAH1B1,RANBP1,RBMX2,RPL39,RPL9,RPLP0,RPS26,SPRY2,TUBA1B,TUBA1C
GO:1901991	negative regulation of mitotic cell cycle phase transition	7	160	0.0031	ENSP00000256442,ENSP00000282388,ENSP00000293288,ENSP00000301633,ENSP00000355922,ENSP00000415430,ENSP00000418960	BAX,BIRC5,BRCA1,CCNB1,CENPF,GTSE1,ZFP36L2
GO:1902275	regulation of chromatin organization	7	162	0.0033	ENSP00000256442,ENSP00000357643,ENSP00000378974,ENSP00000384048,ENSP00000395535,ENSP00000405726,ENSP00000418960	BRCA1,CCNB1,CDC45,MAPK8,MECP2,MKI67,PAXIP1
GO:0051225	spindle assembly	5	70	0.0036	ENSP00000290158,ENSP00000301633,ENSP00000363524,ENSP00000404190,ENSP00000439056	BIRC5,HAUS5,KIF4A,KPNB1,RACGAP1
GO:0019953	sexual reproduction	15	764	0.0041	ENSP00000254810,ENSP00000256442,ENSP00000265753,ENSP00000293288,ENSP00000296503,ENSP00000348020,ENSP00000355778,ENSP00000358921,ENSP00000360608,ENSP00000370196,ENSP00000373952,ENSP00000377536,ENSP00000380378,ENSP00000404190,ENSP00000434024	ACTR1A,BAX,CCNB1,EIF4H,FANCA,GRIN1,H2AFX,H3F3A,H3F3B,HMGB2,MLH3,PAFAH1B1,PTTG1,RACGAP1,SBF1
GO:0044085	cellular component biogenesis	32	2556	0.0044	ENSP00000242257,ENSP00000254810,ENSP00000256442,ENSP00000262291,ENSP00000262302,ENSP00000265056,ENSP00000265753,ENSP00000285968,ENSP00000290158,ENSP00000293288,ENSP00000296503,ENSP00000301633,ENSP00000312981,ENSP00000345728,ENSP00000348020,ENSP00000349960,ENSP00000355778,ENSP00000355922,ENSP00000357633,ENSP00000358921,ENSP00000360608,ENSP00000363524,ENSP00000373952,ENSP00000380378,ENSP00000395535…	ACTB,ACTR1A,ATP7A,BAX,BIRC5,BRF1,CCNB1,CDC45,CENPF,EIF4H,FANCA,FTSJ2,GLRX3,GRIN1,H2AFX,H3F3A,H3F3B,HAUS5,HMGB2,KIF4A,KPNB1,MCM2,MECP2,MLH3,NUBP2,NUP205,PAFAH1B1,RACGAP1,RPLP0,SMARCA4,USP39,VMP1
GO:0033554	cellular response to stress	23	1553	0.0045	ENSP00000256442,ENSP00000262027,ENSP00000293288,ENSP00000296503,ENSP00000298048,ENSP00000300035,ENSP00000305480,ENSP00000342307,ENSP00000342434,ENSP00000343535,ENSP00000345728,ENSP00000348020,ENSP00000357283,ENSP00000372351,ENSP00000373952,ENSP00000376272,ENSP00000377536,ENSP00000378974,ENSP00000384048,ENSP00000405726,ENSP00000415430,ENSP00000418960,ENSP00000434024	ATP7A,BAX,BAZ1B,BRCA1,CCNB1,CDC45,FANCA,FEN1,FOXM1,GTSE1,H2AFX,HMGB2,KIAA0101,LMNA,MAPK8,MARS,MELK,MLH3,PAXIP1,PTTG1,RFC4,USP7,WHSC1
GO:0006333	chromatin assembly or disassembly	7	174	0.0047	ENSP00000254810,ENSP00000265056,ENSP00000296503,ENSP00000342434,ENSP00000355778,ENSP00000395654,ENSP00000434024	BAZ1B,H2AFX,H3F3A,H3F3B,HMGB2,MCM2,SMARCA4
GO:0022607	cellular component assembly	30	2343	0.0049	ENSP00000254810,ENSP00000256442,ENSP00000262291,ENSP00000262302,ENSP00000265056,ENSP00000265753,ENSP00000285968,ENSP00000290158,ENSP00000293288,ENSP00000296503,ENSP00000301633,ENSP00000312981,ENSP00000345728,ENSP00000348020,ENSP00000349960,ENSP00000355778,ENSP00000355922,ENSP00000357633,ENSP00000358921,ENSP00000360608,ENSP00000363524,ENSP00000373952,ENSP00000380378,ENSP00000395535,ENSP00000395654…	ACTB,ACTR1A,ATP7A,BAX,BIRC5,BRF1,CCNB1,CDC45,CENPF,EIF4H,FANCA,GLRX3,GRIN1,H2AFX,H3F3A,H3F3B,HAUS5,HMGB2,KIF4A,KPNB1,MCM2,MECP2,MLH3,NUBP2,NUP205,PAFAH1B1,RACGAP1,SMARCA4,USP39,VMP1
GO:0090307	mitotic spindle assembly	4	40	0.0050	ENSP00000290158,ENSP00000301633,ENSP00000363524,ENSP00000404190	BIRC5,KIF4A,KPNB1,RACGAP1
GO:0009057	macromolecule catabolic process	17	970	0.0051	ENSP00000171111,ENSP00000225927,ENSP00000256442,ENSP00000282388,ENSP00000290158,ENSP00000296503,ENSP00000305480,ENSP00000343535,ENSP00000348849,ENSP00000350911,ENSP00000355315,ENSP00000377492,ENSP00000377536,ENSP00000400467,ENSP00000401564,ENSP00000410758,ENSP00000449328	CCNB1,CTSE,FEN1,HMGB2,HMMR,KEAP1,KPNB1,LSM5,NAGLU,PTTG1,RANBP1,RPL39,RPL9,RPLP0,RPS26,USP7,ZFP36L2
GO:0051173	positive regulation of nitrogen compound metabolic process	35	2946	0.0051	ENSP00000171111,ENSP00000220003,ENSP00000220429,ENSP00000256442,ENSP00000262027,ENSP00000262375,ENSP00000262948,ENSP00000282388,ENSP00000293288,ENSP00000296503,ENSP00000314129,ENSP00000317272,ENSP00000342307,ENSP00000343535,ENSP00000357914,ENSP00000360608,ENSP00000366306,ENSP00000368917,ENSP00000370010,ENSP00000372351,ENSP00000376272,ENSP00000376924,ENSP00000378974,ENSP00000384048,ENSP00000387007…	BAX,BRCA1,BRF1,CCNB1,CSK,DCUN1D2,DNAJA3,FOXM1,GABPB1,GABPB2,GCNT2,GRIN1,H2AFX,HMGB2,HOXC4,KEAP1,MAP2K2,MAPK8,MARS,MECP2,MET,NCAPG2,NRF1,PAXIP1,PPP1R12A,RFC4,SMARCA4,SPIB,SPRY2,TAF15,TFE3,TMSB4X,USP7,WHSC1,ZFP36L2
GO:0070507	regulation of microtubule cytoskeleton organization	7	177	0.0051	ENSP00000317272,ENSP00000326550,ENSP00000380378,ENSP00000395535,ENSP00000401564,ENSP00000418960,ENSP00000479266	BORA,BRCA1,MECP2,MET,PAFAH1B1,RANBP1,TACC3
GO:0045930	negative regulation of mitotic cell cycle	8	243	0.0056	ENSP00000256442,ENSP00000282388,ENSP00000293288,ENSP00000301633,ENSP00000355922,ENSP00000377536,ENSP00000415430,ENSP00000418960	BAX,BIRC5,BRCA1,CCNB1,CENPF,GTSE1,PTTG1,ZFP36L2
GO:0051052	regulation of DNA metabolic process	10	381	0.0056	ENSP00000293288,ENSP00000342307,ENSP00000343535,ENSP00000357283,ENSP00000372351,ENSP00000376272,ENSP00000384048,ENSP00000395535,ENSP00000418960,ENSP00000434024	BAX,BRCA1,FOXM1,H2AFX,LMNA,MECP2,PAXIP1,RFC4,USP7,WHSC1
GO:0051081	nuclear envelope disassembly	3	16	0.0059	ENSP00000256442,ENSP00000288207,ENSP00000380378	CCNB1,CCNB2,PAFAH1B1
GO:0010467	gene expression	41	3733	0.0061	ENSP00000171111,ENSP00000220429,ENSP00000242257,ENSP00000262027,ENSP00000264595,ENSP00000265753,ENSP00000269143,ENSP00000285968,ENSP00000293288,ENSP00000296102,ENSP00000296503,ENSP00000301633,ENSP00000301740,ENSP00000312981,ENSP00000314129,ENSP00000331901,ENSP00000332706,ENSP00000339090,ENSP00000342307,ENSP00000342434,ENSP00000348849,ENSP00000350911,ENSP00000355315,ENSP00000357633,ENSP00000357914…	AFG3L2,AGA,BAX,BAZ1B,BIRC5,BRCA1,BRF1,CTSE,EEF1G,EIF4H,FOXM1,FTSJ2,GABPB1,GABPB2,GLRX3,HMGB2,HOXC4,KEAP1,LSM5,MARS,MECP2,MRPL33,NCAPG2,NRF1,NUP205,PAXIP1,PTTG1,PURA,RBMX2,RPL39,RPL9,RPLP0,RPS26,SMARCA4,SPIB,SRRM2,TAF15,TFE3,THUMPD2,USP39,WHSC1
GO:0031509	telomeric heterochromatin assembly	2	2	0.0061	ENSP00000254810,ENSP00000355778	H3F3A,H3F3B
GO:1902340	negative regulation of chromosome condensation	2	2	0.0061	ENSP00000254810,ENSP00000355778	H3F3A,H3F3B
GO:0040029	regulation of gene expression, epigenetic	8	251	0.0065	ENSP00000254810,ENSP00000342434,ENSP00000349960,ENSP00000352834,ENSP00000355778,ENSP00000395535,ENSP00000418960,ENSP00000434024	ACTB,BAZ1B,BRCA1,H2AFX,H3F3A,H3F3B,MECP2,MYO1C
GO:0006323	DNA packaging	7	195	0.0078	ENSP00000254810,ENSP00000256442,ENSP00000265056,ENSP00000296503,ENSP00000355778,ENSP00000387007,ENSP00000434024	CCNB1,H2AFX,H3F3A,H3F3B,HMGB2,MCM2,NCAPG2
GO:0007420	brain development	13	650	0.0078	ENSP00000220003,ENSP00000225927,ENSP00000293288,ENSP00000310696,ENSP00000319635,ENSP00000326550,ENSP00000345728,ENSP00000355922,ENSP00000360608,ENSP00000380378,ENSP00000395535,ENSP00000434024,ENSP00000480763	ATP7A,B4GALT2,BAX,CENPF,CSK,CXCR2,EPHA5,GRIN1,H2AFX,MECP2,NAGLU,PAFAH1B1,TACC3
GO:0031023	microtubule organizing center organization	5	88	0.0078	ENSP00000300035,ENSP00000380378,ENSP00000389168,ENSP00000418960,ENSP00000439056	BRCA1,HAUS5,KIAA0101,PAFAH1B1,PPP1R12A
GO:0044092	negative regulation of molecular function	18	1119	0.0078	ENSP00000171111,ENSP00000220003,ENSP00000262300,ENSP00000262375,ENSP00000265056,ENSP00000293288,ENSP00000301633,ENSP00000317272,ENSP00000338814,ENSP00000343535,ENSP00000345728,ENSP00000349960,ENSP00000363255,ENSP00000366306,ENSP00000370010,ENSP00000377536,ENSP00000378974,ENSP00000389168	ACTB,ATP7A,BAG5,BAX,BIRC5,CSK,DNAJA3,KEAP1,MAPK8,MCM2,MET,PKMYT1,PPP1R12A,PTTG1,RGS3,SPRY2,TMSB4X,USP7
GO:0044703	multi-organism reproductive process	16	923	0.0078	ENSP00000254810,ENSP00000256442,ENSP00000262291,ENSP00000265753,ENSP00000293288,ENSP00000296503,ENSP00000348020,ENSP00000355778,ENSP00000358921,ENSP00000360608,ENSP00000370196,ENSP00000373952,ENSP00000377536,ENSP00000380378,ENSP00000404190,ENSP00000434024	ACTR1A,BAX,CCNB1,EIF4H,FANCA,GRIN1,H2AFX,H3F3A,H3F3B,HMGB2,MLH3,PAFAH1B1,PTTG1,RACGAP1,SBF1,VMP1
GO:0098813	nuclear chromosome segregation	7	196	0.0078	ENSP00000256442,ENSP00000290158,ENSP00000348020,ENSP00000355922,ENSP00000363524,ENSP00000377536,ENSP00000404190	CCNB1,CENPF,KIF4A,KPNB1,MLH3,PTTG1,RACGAP1
GO:0007283	spermatogenesis	11	490	0.0086	ENSP00000254810,ENSP00000256442,ENSP00000293288,ENSP00000296503,ENSP00000355778,ENSP00000358921,ENSP00000370196,ENSP00000377536,ENSP00000380378,ENSP00000404190,ENSP00000434024	ACTR1A,BAX,CCNB1,H2AFX,H3F3A,H3F3B,HMGB2,PAFAH1B1,PTTG1,RACGAP1,SBF1
GO:0080090	regulation of primary metabolic process	57	5982	0.0088	ENSP00000171111,ENSP00000220003,ENSP00000220429,ENSP00000254810,ENSP00000256442,ENSP00000262027,ENSP00000262300,ENSP00000262375,ENSP00000262948,ENSP00000265753,ENSP00000282388,ENSP00000290158,ENSP00000293288,ENSP00000296503,ENSP00000301633,ENSP00000314129,ENSP00000317272,ENSP00000332706,ENSP00000338814,ENSP00000342307,ENSP00000342434,ENSP00000343535,ENSP00000345728,ENSP00000348849,ENSP00000349960…	ABHD6,ACTB,ATP7A,BAG5,BAX,BAZ1B,BCL7A,BIRC5,BRCA1,BRF1,CCNB1,CDC45,CENPF,CSK,DCUN1D2,DNAJA3,EIF4H,EPHA5,FANCA,FOXM1,GABPB1,GABPB2,GCNT2,GRIN1,H2AFX,H3F3A,H3F3B,HMGB2,HOXC4,KEAP1,KPNB1,LMNA,MAP2K2,MAPK8,MARS,MECP2,MET,NCAPG2,NRF1,PAFAH1B1,PAXIP1,PKMYT1,PPP1R12A,PTTG1,PURA,RFC4,RGS3,RPS26,SMARCA4,SPIB,SPRY2,TAF15,TFE3,TMSB4X,USP7,WHSC1,ZFP36L2
GO:0006310	DNA recombination	7	202	0.0089	ENSP00000296503,ENSP00000305480,ENSP00000348020,ENSP00000384048,ENSP00000405726,ENSP00000418960,ENSP00000434024	BRCA1,CDC45,FEN1,H2AFX,HMGB2,MLH3,PAXIP1
GO:0000280	nuclear division	8	268	0.0090	ENSP00000256442,ENSP00000290158,ENSP00000301633,ENSP00000348020,ENSP00000363524,ENSP00000373952,ENSP00000377536,ENSP00000404190	BIRC5,CCNB1,FANCA,KIF4A,KPNB1,MLH3,PTTG1,RACGAP1
GO:0045931	positive regulation of mitotic cell cycle	6	144	0.0091	ENSP00000256442,ENSP00000301633,ENSP00000380378,ENSP00000395535,ENSP00000401564,ENSP00000405726	BIRC5,CCNB1,CDC45,MECP2,PAFAH1B1,RANBP1
GO:0006998	nuclear envelope organization	4	52	0.0099	ENSP00000256442,ENSP00000288207,ENSP00000357283,ENSP00000380378	CCNB1,CCNB2,LMNA,PAFAH1B1
GO:0010948	negative regulation of cell cycle process	8	273	0.0099	ENSP00000256442,ENSP00000282388,ENSP00000293288,ENSP00000301633,ENSP00000355922,ENSP00000377536,ENSP00000415430,ENSP00000418960	BAX,BIRC5,BRCA1,CCNB1,CENPF,GTSE1,PTTG1,ZFP36L2
GO:0031570	DNA integrity checkpoint	6	147	0.0099	ENSP00000256442,ENSP00000293288,ENSP00000405726,ENSP00000415430,ENSP00000418960,ENSP00000434024	BAX,BRCA1,CCNB1,CDC45,GTSE1,H2AFX
GO:0008283	cell population proliferation	13	676	0.0101	ENSP00000242257,ENSP00000254810,ENSP00000282388,ENSP00000293288,ENSP00000298048,ENSP00000317272,ENSP00000326550,ENSP00000355778,ENSP00000355922,ENSP00000357643,ENSP00000380378,ENSP00000387007,ENSP00000404190	BAX,CENPF,FTSJ2,H3F3A,H3F3B,MELK,MET,MKI67,NCAPG2,PAFAH1B1,RACGAP1,TACC3,ZFP36L2
GO:0048609	multicellular organismal reproductive process	14	766	0.0101	ENSP00000254810,ENSP00000256442,ENSP00000293288,ENSP00000296503,ENSP00000348020,ENSP00000355778,ENSP00000358921,ENSP00000360608,ENSP00000370196,ENSP00000373952,ENSP00000377536,ENSP00000380378,ENSP00000404190,ENSP00000434024	ACTR1A,BAX,CCNB1,FANCA,GRIN1,H2AFX,H3F3A,H3F3B,HMGB2,MLH3,PAFAH1B1,PTTG1,RACGAP1,SBF1
GO:0009314	response to radiation	10	425	0.0102	ENSP00000293288,ENSP00000300035,ENSP00000305480,ENSP00000310696,ENSP00000360608,ENSP00000378974,ENSP00000384048,ENSP00000395535,ENSP00000418960,ENSP00000434024	B4GALT2,BAX,BRCA1,FEN1,GRIN1,H2AFX,KIAA0101,MAPK8,MECP2,PAXIP1
GO:0032508	DNA duplex unwinding	4	53	0.0102	ENSP00000262105,ENSP00000265056,ENSP00000332706,ENSP00000405726	CDC45,MCM2,MCM4,PURA
GO:0019219	regulation of nucleobase-containing compound metabolic process	43	4133	0.0109	ENSP00000171111,ENSP00000220429,ENSP00000254810,ENSP00000256442,ENSP00000262027,ENSP00000262375,ENSP00000262948,ENSP00000282388,ENSP00000293288,ENSP00000296503,ENSP00000301633,ENSP00000314129,ENSP00000317272,ENSP00000332706,ENSP00000342307,ENSP00000342434,ENSP00000343535,ENSP00000345728,ENSP00000348849,ENSP00000355778,ENSP00000355922,ENSP00000357283,ENSP00000357914,ENSP00000360608,ENSP00000370010…	ATP7A,BAX,BAZ1B,BCL7A,BIRC5,BRCA1,BRF1,CCNB1,CDC45,CENPF,DNAJA3,EPHA5,FANCA,FOXM1,GABPB1,GABPB2,GRIN1,H2AFX,H3F3A,H3F3B,HMGB2,HOXC4,KEAP1,LMNA,MAP2K2,MARS,MECP2,MET,NRF1,PAXIP1,PPP1R12A,PTTG1,PURA,RFC4,RPS26,SMARCA4,SPIB,TAF15,TFE3,TMSB4X,USP7,WHSC1,ZFP36L2
GO:0007093	mitotic cell cycle checkpoint	6	153	0.0114	ENSP00000256442,ENSP00000293288,ENSP00000301633,ENSP00000355922,ENSP00000415430,ENSP00000418960	BAX,BIRC5,BRCA1,CCNB1,CENPF,GTSE1
GO:0009892	negative regulation of metabolic process	32	2762	0.0120	ENSP00000220003,ENSP00000254810,ENSP00000256442,ENSP00000262300,ENSP00000262375,ENSP00000262948,ENSP00000282388,ENSP00000293288,ENSP00000296503,ENSP00000301633,ENSP00000317272,ENSP00000332706,ENSP00000338814,ENSP00000342307,ENSP00000343535,ENSP00000348849,ENSP00000355315,ENSP00000355778,ENSP00000355922,ENSP00000363255,ENSP00000366306,ENSP00000372351,ENSP00000377536,ENSP00000380378,ENSP00000395535…	BAG5,BAX,BCL7A,BIRC5,BRCA1,CCNB1,CENPF,CSK,DNAJA3,FOXM1,H2AFX,H3F3A,H3F3B,HMGB2,LSM5,MAP2K2,MECP2,MET,PAFAH1B1,PKMYT1,PTTG1,PURA,RGS3,RPL39,RPL9,RPLP0,RPS26,SMARCA4,SPRY2,USP7,WHSC1,ZFP36L2
GO:0031508	pericentric heterochromatin assembly	2	4	0.0120	ENSP00000254810,ENSP00000355778	H3F3A,H3F3B
GO:0002181	cytoplasmic translation	4	57	0.0125	ENSP00000265753,ENSP00000348849,ENSP00000355315,ENSP00000400467	EIF4H,RPL39,RPL9,RPS26
GO:1901575	organic substance catabolic process	22	1609	0.0126	ENSP00000171111,ENSP00000217426,ENSP00000225927,ENSP00000256442,ENSP00000282388,ENSP00000290158,ENSP00000296503,ENSP00000305480,ENSP00000343535,ENSP00000347689,ENSP00000348849,ENSP00000350911,ENSP00000355315,ENSP00000357535,ENSP00000377492,ENSP00000377536,ENSP00000380378,ENSP00000400467,ENSP00000401564,ENSP00000410758,ENSP00000420315,ENSP00000449328	ABHD6,AHCY,CCNB1,CTSE,ECHS1,FEN1,HMGB2,HMMR,KEAP1,KPNB1,LSM5,NAGLU,PAFAH1B1,PDE4C,PTTG1,RANBP1,RPL39,RPL9,RPLP0,RPS26,USP7,ZFP36L2
GO:0002437	inflammatory response to antigenic stimulus	3	24	0.0130	ENSP00000217426,ENSP00000296503,ENSP00000319635	AHCY,CXCR2,HMGB2
GO:0021680	cerebellar Purkinje cell layer development	3	24	0.0130	ENSP00000225927,ENSP00000310696,ENSP00000345728	ATP7A,B4GALT2,NAGLU
GO:0022037	metencephalon development	5	104	0.0130	ENSP00000225927,ENSP00000310696,ENSP00000345728,ENSP00000360608,ENSP00000395535	ATP7A,B4GALT2,GRIN1,MECP2,NAGLU
GO:0051641	cellular localization	27	2180	0.0130	ENSP00000237163,ENSP00000256442,ENSP00000261558,ENSP00000262375,ENSP00000285968,ENSP00000290158,ENSP00000293288,ENSP00000301072,ENSP00000301633,ENSP00000336799,ENSP00000339090,ENSP00000348849,ENSP00000352834,ENSP00000354742,ENSP00000355315,ENSP00000355922,ENSP00000357283,ENSP00000358921,ENSP00000360608,ENSP00000363524,ENSP00000366306,ENSP00000370010,ENSP00000380378,ENSP00000400467,ENSP00000401564…	ACTR1A,AP5M1,BAX,BIRC5,CCNB1,CENPF,DNAJA3,DOPEY1,GRIN1,HAUS5,IPO9,KIF4A,KPNB1,LMNA,MYO1C,NUP205,PAFAH1B1,RANBP1,RBMX2,RPL39,RPL9,RPLP0,RPS26,SPRY2,TMSB4X,TUBA1B,TUBA1C
GO:2000816	negative regulation of mitotic sister chromatid separation	3	24	0.0130	ENSP00000301633,ENSP00000355922,ENSP00000377536	BIRC5,CENPF,PTTG1
GO:0051171	regulation of nitrogen compound metabolic process	55	5827	0.0132	ENSP00000171111,ENSP00000220003,ENSP00000220429,ENSP00000254810,ENSP00000256442,ENSP00000262027,ENSP00000262300,ENSP00000262375,ENSP00000262948,ENSP00000265753,ENSP00000282388,ENSP00000293288,ENSP00000296503,ENSP00000301633,ENSP00000314129,ENSP00000317272,ENSP00000332706,ENSP00000338814,ENSP00000342307,ENSP00000342434,ENSP00000343535,ENSP00000345728,ENSP00000348849,ENSP00000349960,ENSP00000355778…	ACTB,ATP7A,BAG5,BAX,BAZ1B,BCL7A,BIRC5,BRCA1,BRF1,CCNB1,CDC45,CENPF,CSK,DCUN1D2,DNAJA3,EIF4H,EPHA5,FANCA,FOXM1,GABPB1,GABPB2,GCNT2,GRIN1,H2AFX,H3F3A,H3F3B,HMGB2,HOXC4,KEAP1,LMNA,MAP2K2,MAPK8,MARS,MECP2,MET,NCAPG2,NRF1,PAFAH1B1,PAXIP1,PKMYT1,PPP1R12A,PTTG1,PURA,RFC4,RGS3,RPS26,SMARCA4,SPIB,SPRY2,TAF15,TFE3,TMSB4X,USP7,WHSC1,ZFP36L2
GO:0010605	negative regulation of macromolecule metabolic process	30	2558	0.0143	ENSP00000220003,ENSP00000254810,ENSP00000256442,ENSP00000262375,ENSP00000262948,ENSP00000282388,ENSP00000293288,ENSP00000296503,ENSP00000301633,ENSP00000332706,ENSP00000338814,ENSP00000342307,ENSP00000343535,ENSP00000348849,ENSP00000355315,ENSP00000355778,ENSP00000355922,ENSP00000363255,ENSP00000366306,ENSP00000372351,ENSP00000377536,ENSP00000380378,ENSP00000395535,ENSP00000395654,ENSP00000400467…	BAG5,BAX,BCL7A,BIRC5,BRCA1,CCNB1,CENPF,CSK,DNAJA3,FOXM1,H2AFX,H3F3A,H3F3B,HMGB2,LSM5,MAP2K2,MECP2,PAFAH1B1,PTTG1,PURA,RGS3,RPL39,RPL9,RPLP0,RPS26,SMARCA4,SPRY2,USP7,WHSC1,ZFP36L2
GO:0021543	pallium development	6	163	0.0143	ENSP00000293288,ENSP00000326550,ENSP00000360608,ENSP00000380378,ENSP00000434024,ENSP00000480763	BAX,EPHA5,GRIN1,H2AFX,PAFAH1B1,TACC3
GO:0031325	positive regulation of cellular metabolic process	34	3060	0.0151	ENSP00000171111,ENSP00000220003,ENSP00000220429,ENSP00000256442,ENSP00000262027,ENSP00000262375,ENSP00000262948,ENSP00000282388,ENSP00000293288,ENSP00000296503,ENSP00000314129,ENSP00000317272,ENSP00000342307,ENSP00000343535,ENSP00000357914,ENSP00000360608,ENSP00000366306,ENSP00000368917,ENSP00000370010,ENSP00000372351,ENSP00000376272,ENSP00000376924,ENSP00000384048,ENSP00000387007,ENSP00000389168…	BAX,BRCA1,BRF1,CCNB1,CSK,DCUN1D2,DNAJA3,FOXM1,GABPB1,GABPB2,GCNT2,GRIN1,H2AFX,HMGB2,HOXC4,KEAP1,MAP2K2,MARS,MECP2,MET,NCAPG2,NRF1,PAXIP1,PPP1R12A,RFC4,SMARCA4,SPIB,SPRY2,TAF15,TFE3,TMSB4X,USP7,WHSC1,ZFP36L2
GO:0010041	response to iron(III) ion	2	5	0.0152	ENSP00000256442,ENSP00000345728	ATP7A,CCNB1
GO:0021987	cerebral cortex development	5	109	0.0152	ENSP00000293288,ENSP00000326550,ENSP00000360608,ENSP00000380378,ENSP00000434024	BAX,GRIN1,H2AFX,PAFAH1B1,TACC3
GO:0034728	nucleosome organization	6	167	0.0156	ENSP00000254810,ENSP00000265056,ENSP00000296503,ENSP00000355778,ENSP00000395654,ENSP00000434024	H2AFX,H3F3A,H3F3B,HMGB2,MCM2,SMARCA4
GO:0032269	negative regulation of cellular protein metabolic process	16	1014	0.0159	ENSP00000220003,ENSP00000256442,ENSP00000262375,ENSP00000282388,ENSP00000293288,ENSP00000301633,ENSP00000332706,ENSP00000338814,ENSP00000342307,ENSP00000343535,ENSP00000363255,ENSP00000366306,ENSP00000377536,ENSP00000380378,ENSP00000395535,ENSP00000418960	BAG5,BAX,BIRC5,BRCA1,CCNB1,CSK,DNAJA3,FOXM1,MECP2,PAFAH1B1,PTTG1,PURA,RGS3,SPRY2,USP7,ZFP36L2
GO:0071156	regulation of cell cycle arrest	5	111	0.0160	ENSP00000256442,ENSP00000293288,ENSP00000342307,ENSP00000415430,ENSP00000418960	BAX,BRCA1,CCNB1,FOXM1,GTSE1
GO:0040001	establishment of mitotic spindle localization	3	27	0.0162	ENSP00000290158,ENSP00000366306,ENSP00000380378	KPNB1,PAFAH1B1,SPRY2
GO:0006401	RNA catabolic process	7	237	0.0173	ENSP00000282388,ENSP00000305480,ENSP00000348849,ENSP00000355315,ENSP00000400467,ENSP00000410758,ENSP00000449328	FEN1,LSM5,RPL39,RPL9,RPLP0,RPS26,ZFP36L2
GO:0010638	positive regulation of organelle organization	11	552	0.0173	ENSP00000256442,ENSP00000293288,ENSP00000301633,ENSP00000305480,ENSP00000317272,ENSP00000352834,ENSP00000378974,ENSP00000384048,ENSP00000395535,ENSP00000401564,ENSP00000418960	BAX,BIRC5,BRCA1,CCNB1,FEN1,MAPK8,MECP2,MET,MYO1C,PAXIP1,RANBP1
GO:0071353	cellular response to interleukin-4	3	28	0.0173	ENSP00000171111,ENSP00000265056,ENSP00000336799	KEAP1,MCM2,TUBA1B
GO:1901992	positive regulation of mitotic cell cycle phase transition	4	65	0.0173	ENSP00000256442,ENSP00000301633,ENSP00000395535,ENSP00000405726	BIRC5,CCNB1,CDC45,MECP2
GO:0010629	negative regulation of gene expression	22	1670	0.0177	ENSP00000254810,ENSP00000256442,ENSP00000262375,ENSP00000262948,ENSP00000282388,ENSP00000296503,ENSP00000301633,ENSP00000332706,ENSP00000342307,ENSP00000348849,ENSP00000355315,ENSP00000355778,ENSP00000355922,ENSP00000372351,ENSP00000395535,ENSP00000395654,ENSP00000400467,ENSP00000410758,ENSP00000418960,ENSP00000434024,ENSP00000445868,ENSP00000449328	BCL7A,BIRC5,BRCA1,CCNB1,CENPF,DNAJA3,FOXM1,H2AFX,H3F3A,H3F3B,HMGB2,LSM5,MAP2K2,MECP2,PURA,RPL39,RPL9,RPLP0,RPS26,SMARCA4,WHSC1,ZFP36L2
GO:0006303	double-strand break repair via nonhomologous end joining	4	66	0.0179	ENSP00000372351,ENSP00000384048,ENSP00000418960,ENSP00000434024	BRCA1,H2AFX,PAXIP1,WHSC1
GO:0050790	regulation of catalytic activity	27	2249	0.0179	ENSP00000220003,ENSP00000256442,ENSP00000262300,ENSP00000262375,ENSP00000262948,ENSP00000265056,ENSP00000293288,ENSP00000296503,ENSP00000301633,ENSP00000338814,ENSP00000345728,ENSP00000349960,ENSP00000360608,ENSP00000363255,ENSP00000366306,ENSP00000370010,ENSP00000370196,ENSP00000376272,ENSP00000377536,ENSP00000378974,ENSP00000380378,ENSP00000387007,ENSP00000389168,ENSP00000401564,ENSP00000404190…	ACTB,ATP7A,BAG5,BAX,BIRC5,CCNB1,CSK,DCUN1D2,DNAJA3,EPHA5,GRIN1,HMGB2,MAP2K2,MAPK8,MCM2,NCAPG2,PAFAH1B1,PKMYT1,PPP1R12A,PTTG1,RACGAP1,RANBP1,RFC4,RGS3,SBF1,SPRY2,TMSB4X
GO:0051336	regulation of hydrolase activity	18	1238	0.0179	ENSP00000262300,ENSP00000262375,ENSP00000265056,ENSP00000293288,ENSP00000296503,ENSP00000301633,ENSP00000360608,ENSP00000363255,ENSP00000366306,ENSP00000370010,ENSP00000370196,ENSP00000377536,ENSP00000378974,ENSP00000380378,ENSP00000389168,ENSP00000401564,ENSP00000404190,ENSP00000480763	BAX,BIRC5,DNAJA3,EPHA5,GRIN1,HMGB2,MAPK8,MCM2,PAFAH1B1,PKMYT1,PPP1R12A,PTTG1,RACGAP1,RANBP1,RGS3,SBF1,SPRY2,TMSB4X
GO:0090230	regulation of centromere complex assembly	2	6	0.0184	ENSP00000254810,ENSP00000355778	H3F3A,H3F3B
GO:0044265	cellular macromolecule catabolic process	14	842	0.0192	ENSP00000171111,ENSP00000256442,ENSP00000282388,ENSP00000290158,ENSP00000296503,ENSP00000305480,ENSP00000343535,ENSP00000348849,ENSP00000355315,ENSP00000377536,ENSP00000400467,ENSP00000401564,ENSP00000410758,ENSP00000449328	CCNB1,FEN1,HMGB2,KEAP1,KPNB1,LSM5,PTTG1,RANBP1,RPL39,RPL9,RPLP0,RPS26,USP7,ZFP36L2
GO:0051493	regulation of cytoskeleton organization	10	477	0.0192	ENSP00000317272,ENSP00000326550,ENSP00000352834,ENSP00000370010,ENSP00000380378,ENSP00000395535,ENSP00000401564,ENSP00000418960,ENSP00000479266,ENSP00000480763	BORA,BRCA1,EPHA5,MECP2,MET,MYO1C,PAFAH1B1,RANBP1,TACC3,TMSB4X
GO:0006302	double-strand break repair	6	178	0.0194	ENSP00000305480,ENSP00000372351,ENSP00000384048,ENSP00000405726,ENSP00000418960,ENSP00000434024	BRCA1,CDC45,FEN1,H2AFX,PAXIP1,WHSC1
GO:0072594	establishment of protein localization to organelle	9	396	0.0194	ENSP00000290158,ENSP00000293288,ENSP00000348849,ENSP00000354742,ENSP00000355315,ENSP00000357283,ENSP00000400467,ENSP00000401564,ENSP00000449328	BAX,IPO9,KPNB1,LMNA,RANBP1,RPL39,RPL9,RPLP0,RPS26
GO:0022412	cellular process involved in reproduction in multicellular organism	8	320	0.0199	ENSP00000254810,ENSP00000256442,ENSP00000293288,ENSP00000296503,ENSP00000348020,ENSP00000355778,ENSP00000373952,ENSP00000380378	BAX,CCNB1,FANCA,H3F3A,H3F3B,HMGB2,MLH3,PAFAH1B1
GO:0044271	cellular nitrogen compound biosynthetic process	37	3528	0.0211	ENSP00000171111,ENSP00000220429,ENSP00000262027,ENSP00000265753,ENSP00000293288,ENSP00000296102,ENSP00000296503,ENSP00000300035,ENSP00000301633,ENSP00000314129,ENSP00000331901,ENSP00000332706,ENSP00000342307,ENSP00000342434,ENSP00000347689,ENSP00000348849,ENSP00000355315,ENSP00000355922,ENSP00000357914,ENSP00000362271,ENSP00000369134,ENSP00000372351,ENSP00000376272,ENSP00000376924,ENSP00000377536…	AK1,BAX,BAZ1B,BIRC5,BRCA1,BRF1,CENPF,EEF1G,EIF4H,FOXM1,GABPB1,GABPB2,HMGB2,HOXC4,KEAP1,KIAA0101,MARS,MECP2,MRPL33,NCAPG2,NRF1,PAXIP1,PDE4C,PDHA1,PRPS2,PTTG1,PURA,RFC4,RPL39,RPL9,RPLP0,RPS26,SMARCA4,SPIB,TAF15,TFE3,WHSC1
GO:0000082	G1/S transition of mitotic cell cycle	5	123	0.0219	ENSP00000216122,ENSP00000262105,ENSP00000265056,ENSP00000401564,ENSP00000405726	CDC45,MCM2,MCM4,MCM5,RANBP1
GO:0007626	locomotory behavior	6	184	0.0219	ENSP00000225927,ENSP00000310696,ENSP00000345728,ENSP00000360608,ENSP00000380378,ENSP00000395535	ATP7A,B4GALT2,GRIN1,MECP2,NAGLU,PAFAH1B1
GO:0051254	positive regulation of RNA metabolic process	21	1596	0.0219	ENSP00000220429,ENSP00000256442,ENSP00000262027,ENSP00000262948,ENSP00000282388,ENSP00000296503,ENSP00000314129,ENSP00000317272,ENSP00000342307,ENSP00000357914,ENSP00000360608,ENSP00000376924,ENSP00000384048,ENSP00000389168,ENSP00000395535,ENSP00000395654,ENSP00000399808,ENSP00000418960,ENSP00000448323,ENSP00000471921,ENSP00000474096	BRCA1,BRF1,CCNB1,FOXM1,GABPB1,GABPB2,GRIN1,HMGB2,HOXC4,MAP2K2,MARS,MECP2,MET,NRF1,PAXIP1,PPP1R12A,SMARCA4,SPIB,TAF15,TFE3,ZFP36L2
GO:0007417	central nervous system development	14	861	0.0222	ENSP00000220003,ENSP00000225927,ENSP00000293288,ENSP00000310696,ENSP00000319635,ENSP00000320092,ENSP00000326550,ENSP00000345728,ENSP00000355922,ENSP00000360608,ENSP00000380378,ENSP00000395535,ENSP00000434024,ENSP00000480763	ATP7A,B4GALT2,BAX,CENPF,CSK,CXCR2,EPHA5,GRIN1,H2AFX,MECP2,NAGLU,PAFAH1B1,SH3GL3,TACC3
GO:0051303	establishment of chromosome localization	4	72	0.0222	ENSP00000256442,ENSP00000290158,ENSP00000301633,ENSP00000355922	BIRC5,CCNB1,CENPF,KPNB1
GO:0006796	phosphate-containing compound metabolic process	25	2065	0.0227	ENSP00000220003,ENSP00000254654,ENSP00000256442,ENSP00000256682,ENSP00000262300,ENSP00000262948,ENSP00000282388,ENSP00000288207,ENSP00000298048,ENSP00000301633,ENSP00000317272,ENSP00000342434,ENSP00000347689,ENSP00000360608,ENSP00000362271,ENSP00000362643,ENSP00000369134,ENSP00000370196,ENSP00000378974,ENSP00000380378,ENSP00000381504,ENSP00000389168,ENSP00000395535,ENSP00000420315,ENSP00000480763	ABHD6,AK1,ARF3,BAZ1B,BIRC5,CCNB1,CCNB2,CSK,EPHA5,GRIN1,ILKAP,MAP2K2,MAPK8,MECP2,MELK,MET,PAFAH1B1,PDE4C,PDHA1,PHKA1,PKMYT1,PPP1R12A,PRPS2,SBF1,ZFP36L2
GO:0072422	signal transduction involved in DNA damage checkpoint	4	73	0.0227	ENSP00000256442,ENSP00000293288,ENSP00000415430,ENSP00000418960	BAX,BRCA1,CCNB1,GTSE1
GO:0043029	T cell homeostasis	3	33	0.0232	ENSP00000262375,ENSP00000288207,ENSP00000293288	BAX,CCNB2,DNAJA3
GO:0048513	animal organ development	32	2926	0.0234	ENSP00000220003,ENSP00000225927,ENSP00000254810,ENSP00000256442,ENSP00000262375,ENSP00000265056,ENSP00000282388,ENSP00000288207,ENSP00000293288,ENSP00000296503,ENSP00000298048,ENSP00000310696,ENSP00000317272,ENSP00000319635,ENSP00000326550,ENSP00000345728,ENSP00000355778,ENSP00000355922,ENSP00000357283,ENSP00000360608,ENSP00000366306,ENSP00000372351,ENSP00000373952,ENSP00000380378,ENSP00000381504…	ATP7A,B4GALT2,BAX,CCNB1,CCNB2,CENPF,CSK,CXCR2,DNAJA3,EPHA5,FANCA,GRIN1,H2AFX,H3F3A,H3F3B,HMGB2,HOXC4,LMNA,MCM2,MECP2,MELK,MET,NAGLU,NCAPG2,PAFAH1B1,PAXIP1,PRPS2,SMARCA4,SPRY2,TACC3,WHSC1,ZFP36L2
GO:0000956	nuclear-transcribed mRNA catabolic process	6	191	0.0245	ENSP00000282388,ENSP00000348849,ENSP00000355315,ENSP00000400467,ENSP00000410758,ENSP00000449328	LSM5,RPL39,RPL9,RPLP0,RPS26,ZFP36L2
GO:0006325	chromatin organization	12	683	0.0245	ENSP00000254810,ENSP00000256442,ENSP00000265056,ENSP00000296503,ENSP00000342434,ENSP00000343535,ENSP00000355778,ENSP00000372351,ENSP00000384048,ENSP00000395535,ENSP00000395654,ENSP00000434024	BAZ1B,CCNB1,H2AFX,H3F3A,H3F3B,HMGB2,MCM2,MECP2,PAXIP1,SMARCA4,USP7,WHSC1
GO:0008104	protein localization	24	1966	0.0245	ENSP00000171111,ENSP00000237163,ENSP00000256682,ENSP00000261558,ENSP00000262375,ENSP00000285968,ENSP00000290158,ENSP00000293288,ENSP00000301633,ENSP00000339090,ENSP00000348020,ENSP00000348849,ENSP00000352834,ENSP00000354742,ENSP00000355315,ENSP00000355922,ENSP00000357283,ENSP00000360608,ENSP00000370010,ENSP00000380378,ENSP00000395535,ENSP00000400467,ENSP00000401564,ENSP00000449328	AP5M1,ARF3,BAX,BIRC5,CENPF,DNAJA3,DOPEY1,GRIN1,IPO9,KEAP1,KPNB1,LMNA,MECP2,MLH3,MYO1C,NUP205,PAFAH1B1,RANBP1,RBMX2,RPL39,RPL9,RPLP0,RPS26,TMSB4X
GO:0031400	negative regulation of protein modification process	11	592	0.0246	ENSP00000220003,ENSP00000256442,ENSP00000262375,ENSP00000293288,ENSP00000338814,ENSP00000342307,ENSP00000363255,ENSP00000366306,ENSP00000380378,ENSP00000395535,ENSP00000418960	BAG5,BAX,BRCA1,CCNB1,CSK,DNAJA3,FOXM1,MECP2,PAFAH1B1,RGS3,SPRY2
GO:0043412	macromolecule modification	34	3197	0.0250	ENSP00000171111,ENSP00000220003,ENSP00000242257,ENSP00000254654,ENSP00000256442,ENSP00000262300,ENSP00000262948,ENSP00000264595,ENSP00000282388,ENSP00000288207,ENSP00000298048,ENSP00000301633,ENSP00000310696,ENSP00000312981,ENSP00000317272,ENSP00000342434,ENSP00000343535,ENSP00000345728,ENSP00000349960,ENSP00000360608,ENSP00000362643,ENSP00000368917,ENSP00000370196,ENSP00000372351,ENSP00000378974…	ACTB,AGA,ATP7A,B4GALT2,BAZ1B,BIRC5,BRCA1,CCNB1,CCNB2,CSK,DCUN1D2,EPHA5,FTSJ2,GCNT2,GRIN1,ILKAP,KEAP1,MAP2K2,MAPK8,MECP2,MELK,MET,MUC5AC,PAXIP1,PHKA1,PKMYT1,PPP1R12A,RNF130,SBF1,THUMPD2,USP39,USP7,WHSC1,ZFP36L2
GO:0009056	catabolic process	23	1859	0.0255	ENSP00000171111,ENSP00000217426,ENSP00000225927,ENSP00000256442,ENSP00000262291,ENSP00000282388,ENSP00000290158,ENSP00000296503,ENSP00000305480,ENSP00000343535,ENSP00000347689,ENSP00000348849,ENSP00000350911,ENSP00000355315,ENSP00000357535,ENSP00000377492,ENSP00000377536,ENSP00000380378,ENSP00000400467,ENSP00000401564,ENSP00000410758,ENSP00000420315,ENSP00000449328	ABHD6,AHCY,CCNB1,CTSE,ECHS1,FEN1,HMGB2,HMMR,KEAP1,KPNB1,LSM5,NAGLU,PAFAH1B1,PDE4C,PTTG1,RANBP1,RPL39,RPL9,RPLP0,RPS26,USP7,VMP1,ZFP36L2
GO:0033260	nuclear DNA replication	3	35	0.0257	ENSP00000305480,ENSP00000376272,ENSP00000405726	CDC45,FEN1,RFC4
GO:0018108	peptidyl-tyrosine phosphorylation	6	195	0.0262	ENSP00000220003,ENSP00000262948,ENSP00000298048,ENSP00000317272,ENSP00000342434,ENSP00000480763	BAZ1B,CSK,EPHA5,MAP2K2,MELK,MET
GO:0006612	protein targeting to membrane	5	132	0.0263	ENSP00000348849,ENSP00000352834,ENSP00000355315,ENSP00000400467,ENSP00000449328	MYO1C,RPL39,RPL9,RPLP0,RPS26
GO:0007098	centrosome cycle	4	78	0.0263	ENSP00000300035,ENSP00000389168,ENSP00000418960,ENSP00000439056	BRCA1,HAUS5,KIAA0101,PPP1R12A
GO:0008584	male gonad development	5	132	0.0263	ENSP00000254810,ENSP00000293288,ENSP00000296503,ENSP00000355778,ENSP00000373952	BAX,FANCA,H3F3A,H3F3B,HMGB2
GO:0051704	multi-organism process	26	2222	0.0264	ENSP00000254810,ENSP00000256442,ENSP00000262291,ENSP00000265753,ENSP00000285968,ENSP00000290158,ENSP00000293288,ENSP00000296503,ENSP00000317272,ENSP00000331901,ENSP00000343535,ENSP00000348020,ENSP00000355315,ENSP00000355778,ENSP00000358921,ENSP00000360608,ENSP00000370196,ENSP00000373952,ENSP00000377536,ENSP00000378974,ENSP00000380378,ENSP00000395535,ENSP00000395654,ENSP00000401564,ENSP00000404190…	ACTR1A,BAX,CCNB1,EEF1G,EIF4H,FANCA,GRIN1,H2AFX,H3F3A,H3F3B,HMGB2,KPNB1,MAPK8,MECP2,MET,MLH3,NUP205,PAFAH1B1,PTTG1,RACGAP1,RANBP1,RPL39,SBF1,SMARCA4,USP7,VMP1
GO:0031062	positive regulation of histone methylation	3	36	0.0269	ENSP00000384048,ENSP00000395535,ENSP00000418960	BRCA1,MECP2,PAXIP1
GO:0031056	regulation of histone modification	5	134	0.0270	ENSP00000256442,ENSP00000378974,ENSP00000384048,ENSP00000395535,ENSP00000418960	BRCA1,CCNB1,MAPK8,MECP2,PAXIP1
GO:0048519	negative regulation of biological process	47	4953	0.0270	ENSP00000171111,ENSP00000220003,ENSP00000254810,ENSP00000256442,ENSP00000262300,ENSP00000262375,ENSP00000262948,ENSP00000265056,ENSP00000282388,ENSP00000293288,ENSP00000296503,ENSP00000301633,ENSP00000317272,ENSP00000319635,ENSP00000320092,ENSP00000332706,ENSP00000338814,ENSP00000342307,ENSP00000343535,ENSP00000345728,ENSP00000348849,ENSP00000355315,ENSP00000355778,ENSP00000355922,ENSP00000357283…	ABHD6,ATP7A,BAG5,BAX,BCL7A,BIRC5,BRCA1,CCNB1,CDC45,CENPF,CSK,CXCR2,DNAJA3,FOXM1,GCNT2,GLRX3,GRIN1,GTSE1,H2AFX,H3F3A,H3F3B,HMGB2,KEAP1,LMNA,LSM5,MAP2K2,MAPK8,MCM2,MECP2,MET,NCAPG2,PAFAH1B1,PKMYT1,PTTG1,PURA,RGS3,RPL39,RPL9,RPLP0,RPS26,SH3GL3,SMARCA4,SPRY2,TMSB4X,USP7,WHSC1,ZFP36L2
GO:2000026	regulation of multicellular organismal development	23	1876	0.0270	ENSP00000171111,ENSP00000254810,ENSP00000256442,ENSP00000282388,ENSP00000293288,ENSP00000296503,ENSP00000314129,ENSP00000319635,ENSP00000320092,ENSP00000338814,ENSP00000355778,ENSP00000355922,ENSP00000360608,ENSP00000366306,ENSP00000368917,ENSP00000372351,ENSP00000373952,ENSP00000380378,ENSP00000384048,ENSP00000387007,ENSP00000395535,ENSP00000404190,ENSP00000418960	BAG5,BAX,BRCA1,CCNB1,CENPF,CXCR2,FANCA,GCNT2,GRIN1,H3F3A,H3F3B,HMGB2,KEAP1,MECP2,NCAPG2,PAFAH1B1,PAXIP1,RACGAP1,SH3GL3,SPRY2,TFE3,WHSC1,ZFP36L2
GO:0031323	regulation of cellular metabolic process	55	6082	0.0272	ENSP00000171111,ENSP00000220003,ENSP00000220429,ENSP00000254810,ENSP00000256442,ENSP00000262027,ENSP00000262300,ENSP00000262375,ENSP00000262948,ENSP00000265753,ENSP00000282388,ENSP00000293288,ENSP00000296503,ENSP00000301633,ENSP00000314129,ENSP00000317272,ENSP00000332706,ENSP00000338814,ENSP00000342307,ENSP00000342434,ENSP00000343535,ENSP00000345728,ENSP00000348849,ENSP00000349960,ENSP00000355778…	ACTB,ATP7A,BAG5,BAX,BAZ1B,BCL7A,BIRC5,BRCA1,BRF1,CCNB1,CDC45,CENPF,CSK,DCUN1D2,DNAJA3,EIF4H,EPHA5,FANCA,FOXM1,GABPB1,GABPB2,GCNT2,GRIN1,H2AFX,H3F3A,H3F3B,HMGB2,HOXC4,KEAP1,LMNA,MAP2K2,MAPK8,MARS,MECP2,MET,NCAPG2,NRF1,PAFAH1B1,PAXIP1,PKMYT1,PPP1R12A,PTTG1,PURA,RFC4,RGS3,RPS26,SMARCA4,SPIB,SPRY2,TAF15,TFE3,TMSB4X,USP7,WHSC1,ZFP36L2
GO:0045786	negative regulation of cell cycle	10	517	0.0273	ENSP00000256442,ENSP00000282388,ENSP00000293288,ENSP00000301633,ENSP00000355922,ENSP00000377536,ENSP00000405726,ENSP00000415430,ENSP00000418960,ENSP00000434024	BAX,BIRC5,BRCA1,CCNB1,CDC45,CENPF,GTSE1,H2AFX,PTTG1,ZFP36L2
GO:0051256	mitotic spindle midzone assembly	2	9	0.0278	ENSP00000363524,ENSP00000404190	KIF4A,RACGAP1
GO:0140014	mitotic nuclear division	5	136	0.0278	ENSP00000256442,ENSP00000290158,ENSP00000301633,ENSP00000363524,ENSP00000404190	BIRC5,CCNB1,KIF4A,KPNB1,RACGAP1
GO:0006334	nucleosome assembly	5	137	0.0281	ENSP00000254810,ENSP00000265056,ENSP00000296503,ENSP00000355778,ENSP00000434024	H2AFX,H3F3A,H3F3B,HMGB2,MCM2
GO:0032268	regulation of cellular protein metabolic process	28	2486	0.0281	ENSP00000171111,ENSP00000220003,ENSP00000256442,ENSP00000262300,ENSP00000262375,ENSP00000262948,ENSP00000265753,ENSP00000282388,ENSP00000293288,ENSP00000301633,ENSP00000332706,ENSP00000338814,ENSP00000342307,ENSP00000343535,ENSP00000349960,ENSP00000360608,ENSP00000363255,ENSP00000366306,ENSP00000368917,ENSP00000377536,ENSP00000378974,ENSP00000380378,ENSP00000384048,ENSP00000387007,ENSP00000389168…	ACTB,BAG5,BAX,BIRC5,BRCA1,CCNB1,CSK,DCUN1D2,DNAJA3,EIF4H,FOXM1,GCNT2,GRIN1,KEAP1,MAP2K2,MAPK8,MECP2,NCAPG2,PAFAH1B1,PAXIP1,PKMYT1,PPP1R12A,PTTG1,PURA,RGS3,SPRY2,USP7,ZFP36L2
GO:0051252	regulation of RNA metabolic process	39	3890	0.0281	ENSP00000171111,ENSP00000220429,ENSP00000254810,ENSP00000256442,ENSP00000262027,ENSP00000262375,ENSP00000262948,ENSP00000282388,ENSP00000296503,ENSP00000301633,ENSP00000314129,ENSP00000317272,ENSP00000332706,ENSP00000342307,ENSP00000342434,ENSP00000343535,ENSP00000348849,ENSP00000355778,ENSP00000355922,ENSP00000357914,ENSP00000360608,ENSP00000370010,ENSP00000372351,ENSP00000373952,ENSP00000376924…	BAZ1B,BCL7A,BIRC5,BRCA1,BRF1,CCNB1,CDC45,CENPF,DNAJA3,EPHA5,FANCA,FOXM1,GABPB1,GABPB2,GRIN1,H2AFX,H3F3A,H3F3B,HMGB2,HOXC4,KEAP1,MAP2K2,MARS,MECP2,MET,NRF1,PAXIP1,PPP1R12A,PTTG1,PURA,RPS26,SMARCA4,SPIB,TAF15,TFE3,TMSB4X,USP7,WHSC1,ZFP36L2
GO:0045893	positive regulation of transcription, DNA-templated	19	1435	0.0283	ENSP00000220429,ENSP00000262027,ENSP00000262948,ENSP00000296503,ENSP00000314129,ENSP00000317272,ENSP00000342307,ENSP00000357914,ENSP00000360608,ENSP00000376924,ENSP00000384048,ENSP00000389168,ENSP00000395535,ENSP00000395654,ENSP00000399808,ENSP00000418960,ENSP00000448323,ENSP00000471921,ENSP00000474096	BRCA1,BRF1,FOXM1,GABPB1,GABPB2,GRIN1,HMGB2,HOXC4,MAP2K2,MARS,MECP2,MET,NRF1,PAXIP1,PPP1R12A,SMARCA4,SPIB,TAF15,TFE3
GO:0000077	DNA damage checkpoint	5	138	0.0286	ENSP00000256442,ENSP00000293288,ENSP00000415430,ENSP00000418960,ENSP00000434024	BAX,BRCA1,CCNB1,GTSE1,H2AFX
GO:0006464	cellular protein modification process	32	2999	0.0298	ENSP00000171111,ENSP00000220003,ENSP00000254654,ENSP00000256442,ENSP00000262300,ENSP00000262948,ENSP00000264595,ENSP00000282388,ENSP00000288207,ENSP00000298048,ENSP00000301633,ENSP00000310696,ENSP00000312981,ENSP00000317272,ENSP00000342434,ENSP00000343535,ENSP00000345728,ENSP00000349960,ENSP00000360608,ENSP00000362643,ENSP00000368917,ENSP00000370196,ENSP00000372351,ENSP00000378974,ENSP00000384048…	ACTB,AGA,ATP7A,B4GALT2,BAZ1B,BIRC5,BRCA1,CCNB1,CCNB2,CSK,DCUN1D2,EPHA5,GCNT2,GRIN1,ILKAP,KEAP1,MAP2K2,MAPK8,MECP2,MELK,MET,MUC5AC,PAXIP1,PHKA1,PKMYT1,PPP1R12A,RNF130,SBF1,USP39,USP7,WHSC1,ZFP36L2
GO:0007566	embryo implantation	3	39	0.0304	ENSP00000254810,ENSP00000262291,ENSP00000355778	H3F3A,H3F3B,VMP1
GO:2001022	positive regulation of response to DNA damage stimulus	4	84	0.0305	ENSP00000342307,ENSP00000384048,ENSP00000418960,ENSP00000434024	BRCA1,FOXM1,H2AFX,PAXIP1
GO:0006950	response to stress	34	3267	0.0311	ENSP00000217426,ENSP00000220003,ENSP00000254810,ENSP00000256442,ENSP00000262027,ENSP00000262375,ENSP00000282388,ENSP00000293288,ENSP00000296503,ENSP00000298048,ENSP00000300035,ENSP00000305480,ENSP00000319635,ENSP00000342307,ENSP00000342434,ENSP00000343535,ENSP00000345728,ENSP00000348020,ENSP00000352834,ENSP00000355315,ENSP00000355778,ENSP00000357283,ENSP00000363694,ENSP00000372351,ENSP00000373952…	AHCY,ATP7A,BAX,BAZ1B,BRCA1,CCNB1,CDC45,CSK,CXCR2,DNAJA3,EPB41L4B,FANCA,FEN1,FOXM1,GTSE1,H2AFX,H3F3A,H3F3B,HMGB2,KIAA0101,LMNA,MAPK8,MARS,MECP2,MELK,MLH3,MYO1C,PAXIP1,PTTG1,RFC4,RPL39,USP7,WHSC1,ZFP36L2
GO:0006355	regulation of transcription, DNA-templated	37	3661	0.0313	ENSP00000171111,ENSP00000220429,ENSP00000254810,ENSP00000262027,ENSP00000262375,ENSP00000262948,ENSP00000282388,ENSP00000296503,ENSP00000301633,ENSP00000314129,ENSP00000317272,ENSP00000332706,ENSP00000342307,ENSP00000342434,ENSP00000343535,ENSP00000355778,ENSP00000355922,ENSP00000357914,ENSP00000360608,ENSP00000370010,ENSP00000372351,ENSP00000373952,ENSP00000376924,ENSP00000377536,ENSP00000384048…	BAZ1B,BCL7A,BIRC5,BRCA1,BRF1,CDC45,CENPF,DNAJA3,EPHA5,FANCA,FOXM1,GABPB1,GABPB2,GRIN1,H2AFX,H3F3A,H3F3B,HMGB2,HOXC4,KEAP1,MAP2K2,MARS,MECP2,MET,NRF1,PAXIP1,PPP1R12A,PTTG1,PURA,SMARCA4,SPIB,TAF15,TFE3,TMSB4X,USP7,WHSC1,ZFP36L2
GO:0006412	translation	8	362	0.0313	ENSP00000262027,ENSP00000265753,ENSP00000296102,ENSP00000331901,ENSP00000348849,ENSP00000355315,ENSP00000400467,ENSP00000449328	EEF1G,EIF4H,MARS,MRPL33,RPL39,RPL9,RPLP0,RPS26
GO:0006413	translational initiation	5	142	0.0313	ENSP00000265753,ENSP00000348849,ENSP00000355315,ENSP00000400467,ENSP00000449328	EIF4H,RPL39,RPL9,RPLP0,RPS26
GO:0016310	phosphorylation	17	1236	0.0313	ENSP00000220003,ENSP00000256442,ENSP00000262300,ENSP00000262948,ENSP00000282388,ENSP00000288207,ENSP00000298048,ENSP00000301633,ENSP00000317272,ENSP00000342434,ENSP00000360608,ENSP00000362271,ENSP00000362643,ENSP00000378974,ENSP00000381504,ENSP00000395535,ENSP00000480763	AK1,BAZ1B,BIRC5,CCNB1,CCNB2,CSK,EPHA5,GRIN1,MAP2K2,MAPK8,MECP2,MELK,MET,PHKA1,PKMYT1,PRPS2,ZFP36L2
GO:0031058	positive regulation of histone modification	4	86	0.0313	ENSP00000256442,ENSP00000384048,ENSP00000395535,ENSP00000418960	BRCA1,CCNB1,MECP2,PAXIP1
GO:0048515	spermatid differentiation	5	143	0.0313	ENSP00000254810,ENSP00000293288,ENSP00000296503,ENSP00000355778,ENSP00000380378	BAX,H3F3A,H3F3B,HMGB2,PAFAH1B1
GO:0051574	positive regulation of histone H3-K9 methylation	2	10	0.0313	ENSP00000395535,ENSP00000418960	BRCA1,MECP2
GO:0071158	positive regulation of cell cycle arrest	4	85	0.0313	ENSP00000256442,ENSP00000293288,ENSP00000415430,ENSP00000418960	BAX,BRCA1,CCNB1,GTSE1
GO:0071281	cellular response to iron ion	2	10	0.0313	ENSP00000256442,ENSP00000345728	ATP7A,CCNB1
GO:1901838	positive regulation of transcription of nucleolar large rRNA by RNA polymerase I	2	10	0.0313	ENSP00000262027,ENSP00000395654	MARS,SMARCA4
GO:0006468	protein phosphorylation	14	923	0.0314	ENSP00000220003,ENSP00000256442,ENSP00000262300,ENSP00000262948,ENSP00000282388,ENSP00000288207,ENSP00000298048,ENSP00000301633,ENSP00000317272,ENSP00000342434,ENSP00000360608,ENSP00000362643,ENSP00000378974,ENSP00000480763	BAZ1B,BIRC5,CCNB1,CCNB2,CSK,EPHA5,GRIN1,MAP2K2,MAPK8,MELK,MET,PHKA1,PKMYT1,ZFP36L2
GO:0000724	double-strand break repair via homologous recombination	4	88	0.0330	ENSP00000305480,ENSP00000405726,ENSP00000418960,ENSP00000434024	BRCA1,CDC45,FEN1,H2AFX
GO:0030335	positive regulation of cell migration	9	452	0.0330	ENSP00000317272,ENSP00000319635,ENSP00000345728,ENSP00000352834,ENSP00000363694,ENSP00000366306,ENSP00000368917,ENSP00000370010,ENSP00000415430	ATP7A,CXCR2,EPB41L4B,GCNT2,GTSE1,MET,MYO1C,SPRY2,TMSB4X
GO:0051239	regulation of multicellular organismal process	30	2788	0.0337	ENSP00000171111,ENSP00000220003,ENSP00000254810,ENSP00000256442,ENSP00000269143,ENSP00000282388,ENSP00000293288,ENSP00000296503,ENSP00000314129,ENSP00000317272,ENSP00000319635,ENSP00000320092,ENSP00000338814,ENSP00000355778,ENSP00000355922,ENSP00000357283,ENSP00000357633,ENSP00000360608,ENSP00000363694,ENSP00000366306,ENSP00000368917,ENSP00000370010,ENSP00000372351,ENSP00000373952,ENSP00000380378…	AFG3L2,BAG5,BAX,BRCA1,CCNB1,CENPF,CSK,CXCR2,EPB41L4B,FANCA,GCNT2,GLRX3,GRIN1,H3F3A,H3F3B,HMGB2,KEAP1,LMNA,MECP2,MET,NCAPG2,PAFAH1B1,PAXIP1,RACGAP1,SH3GL3,SPRY2,TFE3,TMSB4X,WHSC1,ZFP36L2
GO:0009416	response to light stimulus	7	290	0.0338	ENSP00000293288,ENSP00000300035,ENSP00000305480,ENSP00000310696,ENSP00000360608,ENSP00000378974,ENSP00000395535	B4GALT2,BAX,FEN1,GRIN1,KIAA0101,MAPK8,MECP2
GO:0016070	RNA metabolic process	35	3430	0.0338	ENSP00000171111,ENSP00000220429,ENSP00000242257,ENSP00000262027,ENSP00000282388,ENSP00000293288,ENSP00000296503,ENSP00000301633,ENSP00000301740,ENSP00000305480,ENSP00000312981,ENSP00000314129,ENSP00000332706,ENSP00000339090,ENSP00000342307,ENSP00000342434,ENSP00000348849,ENSP00000355315,ENSP00000357914,ENSP00000372351,ENSP00000376924,ENSP00000377536,ENSP00000384048,ENSP00000387007,ENSP00000395535…	BAX,BAZ1B,BIRC5,BRCA1,BRF1,FEN1,FOXM1,FTSJ2,GABPB1,GABPB2,HMGB2,HOXC4,KEAP1,LSM5,MARS,MECP2,NCAPG2,NRF1,PAXIP1,PTTG1,PURA,RBMX2,RPL39,RPL9,RPLP0,RPS26,SMARCA4,SPIB,SRRM2,TAF15,TFE3,THUMPD2,USP39,WHSC1,ZFP36L2
GO:0090150	establishment of protein localization to membrane	6	217	0.0348	ENSP00000293288,ENSP00000348849,ENSP00000352834,ENSP00000355315,ENSP00000400467,ENSP00000449328	BAX,MYO1C,RPL39,RPL9,RPLP0,RPS26
GO:0044093	positive regulation of molecular function	21	1713	0.0357	ENSP00000220003,ENSP00000256442,ENSP00000262375,ENSP00000262948,ENSP00000293288,ENSP00000296503,ENSP00000317272,ENSP00000345728,ENSP00000360608,ENSP00000363255,ENSP00000366306,ENSP00000370010,ENSP00000376272,ENSP00000378974,ENSP00000387007,ENSP00000389168,ENSP00000395654,ENSP00000401564,ENSP00000404190,ENSP00000417706,ENSP00000480763	ATP7A,BAX,CCNB1,CSK,DCUN1D2,DNAJA3,EPHA5,GRIN1,HMGB2,MAP2K2,MAPK8,MET,NCAPG2,PPP1R12A,RACGAP1,RANBP1,RFC4,RGS3,SMARCA4,SPRY2,TMSB4X
GO:0030705	cytoskeleton-dependent intracellular transport	5	151	0.0363	ENSP00000301072,ENSP00000336799,ENSP00000352834,ENSP00000363524,ENSP00000380378	KIF4A,MYO1C,PAFAH1B1,TUBA1B,TUBA1C
GO:0006614	SRP-dependent cotranslational protein targeting to membrane	4	92	0.0368	ENSP00000348849,ENSP00000355315,ENSP00000400467,ENSP00000449328	RPL39,RPL9,RPLP0,RPS26
GO:0009628	response to abiotic stimulus	15	1052	0.0369	ENSP00000217426,ENSP00000256442,ENSP00000262375,ENSP00000293288,ENSP00000300035,ENSP00000305480,ENSP00000310696,ENSP00000345728,ENSP00000357283,ENSP00000360608,ENSP00000378974,ENSP00000384048,ENSP00000395535,ENSP00000418960,ENSP00000434024	AHCY,ATP7A,B4GALT2,BAX,BRCA1,CCNB1,DNAJA3,FEN1,GRIN1,H2AFX,KIAA0101,LMNA,MAPK8,MECP2,PAXIP1
GO:0043085	positive regulation of catalytic activity	18	1381	0.0376	ENSP00000220003,ENSP00000256442,ENSP00000262375,ENSP00000262948,ENSP00000293288,ENSP00000296503,ENSP00000345728,ENSP00000360608,ENSP00000363255,ENSP00000366306,ENSP00000370010,ENSP00000376272,ENSP00000378974,ENSP00000387007,ENSP00000389168,ENSP00000401564,ENSP00000404190,ENSP00000417706	ATP7A,BAX,CCNB1,CSK,DCUN1D2,DNAJA3,GRIN1,HMGB2,MAP2K2,MAPK8,NCAPG2,PPP1R12A,RACGAP1,RANBP1,RFC4,RGS3,SPRY2,TMSB4X
GO:0007077	mitotic nuclear envelope disassembly	2	12	0.0378	ENSP00000256442,ENSP00000288207	CCNB1,CCNB2
GO:0030203	glycosaminoglycan metabolic process	5	153	0.0378	ENSP00000017003,ENSP00000225927,ENSP00000310696,ENSP00000368917,ENSP00000377492	B4GALT2,GCNT2,HMMR,NAGLU,XYLT2
GO:0051988	regulation of attachment of spindle microtubules to kinetochore	2	12	0.0378	ENSP00000256442,ENSP00000404190	CCNB1,RACGAP1
GO:0008542	visual learning	3	45	0.0382	ENSP00000310696,ENSP00000360608,ENSP00000395535	B4GALT2,GRIN1,MECP2
GO:0030334	regulation of cell migration	12	753	0.0389	ENSP00000317272,ENSP00000319635,ENSP00000345728,ENSP00000352834,ENSP00000357283,ENSP00000363694,ENSP00000366306,ENSP00000368917,ENSP00000370010,ENSP00000395535,ENSP00000415430,ENSP00000420315	ABHD6,ATP7A,CXCR2,EPB41L4B,GCNT2,GTSE1,LMNA,MECP2,MET,MYO1C,SPRY2,TMSB4X
GO:0046907	intracellular transport	18	1390	0.0389	ENSP00000237163,ENSP00000261558,ENSP00000285968,ENSP00000290158,ENSP00000301072,ENSP00000336799,ENSP00000339090,ENSP00000348849,ENSP00000352834,ENSP00000354742,ENSP00000355315,ENSP00000357283,ENSP00000358921,ENSP00000363524,ENSP00000380378,ENSP00000400467,ENSP00000401564,ENSP00000449328	ACTR1A,AP5M1,DOPEY1,IPO9,KIF4A,KPNB1,LMNA,MYO1C,NUP205,PAFAH1B1,RANBP1,RBMX2,RPL39,RPL9,RPLP0,RPS26,TUBA1B,TUBA1C
GO:0031324	negative regulation of cellular metabolic process	27	2463	0.0403	ENSP00000220003,ENSP00000254810,ENSP00000256442,ENSP00000262300,ENSP00000262375,ENSP00000282388,ENSP00000293288,ENSP00000296503,ENSP00000301633,ENSP00000317272,ENSP00000332706,ENSP00000338814,ENSP00000342307,ENSP00000343535,ENSP00000348849,ENSP00000355778,ENSP00000355922,ENSP00000363255,ENSP00000366306,ENSP00000372351,ENSP00000377536,ENSP00000380378,ENSP00000395535,ENSP00000395654,ENSP00000418960…	BAG5,BAX,BCL7A,BIRC5,BRCA1,CCNB1,CENPF,CSK,DNAJA3,FOXM1,H2AFX,H3F3A,H3F3B,HMGB2,MECP2,MET,PAFAH1B1,PKMYT1,PTTG1,PURA,RGS3,RPS26,SMARCA4,SPRY2,USP7,WHSC1,ZFP36L2
GO:0019886	antigen processing and presentation of exogenous peptide antigen via MHC class II	4	96	0.0404	ENSP00000350911,ENSP00000358921,ENSP00000363524,ENSP00000404190	ACTR1A,CTSE,KIF4A,RACGAP1
GO:0021549	cerebellum development	4	96	0.0404	ENSP00000225927,ENSP00000310696,ENSP00000345728,ENSP00000395535	ATP7A,B4GALT2,MECP2,NAGLU
GO:0043409	negative regulation of MAPK cascade	5	158	0.0410	ENSP00000220003,ENSP00000342307,ENSP00000363255,ENSP00000366306,ENSP00000380378	CSK,FOXM1,PAFAH1B1,RGS3,SPRY2
GO:0007281	germ cell development	6	229	0.0412	ENSP00000254810,ENSP00000256442,ENSP00000293288,ENSP00000296503,ENSP00000355778,ENSP00000380378	BAX,CCNB1,H3F3A,H3F3B,HMGB2,PAFAH1B1
GO:0055015	ventricular cardiac muscle cell development	2	13	0.0412	ENSP00000256442,ENSP00000357283	CCNB1,LMNA
GO:0042692	muscle cell differentiation	6	230	0.0414	ENSP00000254810,ENSP00000256442,ENSP00000269143,ENSP00000355778,ENSP00000357283,ENSP00000395535	AFG3L2,CCNB1,H3F3A,H3F3B,LMNA,MECP2
GO:0006342	chromatin silencing	4	98	0.0417	ENSP00000254810,ENSP00000355778,ENSP00000395535,ENSP00000434024	H2AFX,H3F3A,H3F3B,MECP2
GO:2001252	positive regulation of chromosome organization	5	160	0.0417	ENSP00000256442,ENSP00000305480,ENSP00000384048,ENSP00000395535,ENSP00000418960	BRCA1,CCNB1,FEN1,MECP2,PAXIP1
GO:0051100	negative regulation of binding	5	161	0.0422	ENSP00000293288,ENSP00000317272,ENSP00000349960,ENSP00000370010,ENSP00000378974	ACTB,BAX,MAPK8,MET,TMSB4X
GO:0080134	regulation of response to stress	17	1299	0.0422	ENSP00000262375,ENSP00000262948,ENSP00000293288,ENSP00000296503,ENSP00000317272,ENSP00000338814,ENSP00000342307,ENSP00000345728,ENSP00000357283,ENSP00000370010,ENSP00000372351,ENSP00000373952,ENSP00000380378,ENSP00000384048,ENSP00000418960,ENSP00000434024,ENSP00000485659	ATP7A,BAG5,BAX,BRCA1,DNAJA3,FANCA,FOXM1,H2AFX,HMGB2,LMNA,MAP2K2,MET,MUC5AC,PAFAH1B1,PAXIP1,TMSB4X,WHSC1
GO:0009891	positive regulation of biosynthetic process	22	1876	0.0423	ENSP00000220429,ENSP00000262027,ENSP00000262948,ENSP00000296503,ENSP00000314129,ENSP00000317272,ENSP00000342307,ENSP00000357914,ENSP00000360608,ENSP00000370010,ENSP00000376272,ENSP00000376924,ENSP00000384048,ENSP00000389168,ENSP00000395535,ENSP00000395654,ENSP00000399808,ENSP00000418960,ENSP00000420315,ENSP00000448323,ENSP00000471921,ENSP00000474096	ABHD6,BRCA1,BRF1,FOXM1,GABPB1,GABPB2,GRIN1,HMGB2,HOXC4,MAP2K2,MARS,MECP2,MET,NRF1,PAXIP1,PPP1R12A,RFC4,SMARCA4,SPIB,TAF15,TFE3,TMSB4X
GO:1901135	carbohydrate derivative metabolic process	15	1083	0.0427	ENSP00000017003,ENSP00000217426,ENSP00000225927,ENSP00000264595,ENSP00000293288,ENSP00000310696,ENSP00000345728,ENSP00000347689,ENSP00000362271,ENSP00000368917,ENSP00000369134,ENSP00000377492,ENSP00000381504,ENSP00000395535,ENSP00000485659	AGA,AHCY,AK1,ATP7A,B4GALT2,BAX,GCNT2,HMMR,MECP2,MUC5AC,NAGLU,PDE4C,PDHA1,PRPS2,XYLT2
GO:0043069	negative regulation of programmed cell death	13	873	0.0428	ENSP00000262375,ENSP00000293288,ENSP00000296503,ENSP00000301633,ENSP00000317272,ENSP00000319635,ENSP00000338814,ENSP00000357283,ENSP00000360608,ENSP00000366306,ENSP00000378974,ENSP00000395535,ENSP00000418960	BAG5,BAX,BIRC5,BRCA1,CXCR2,DNAJA3,GRIN1,HMGB2,LMNA,MAPK8,MECP2,MET,SPRY2
GO:0030071	regulation of mitotic metaphase/anaphase transition	3	49	0.0430	ENSP00000256442,ENSP00000301633,ENSP00000355922	BIRC5,CCNB1,CENPF
GO:0044248	cellular catabolic process	20	1646	0.0430	ENSP00000171111,ENSP00000217426,ENSP00000256442,ENSP00000262291,ENSP00000282388,ENSP00000290158,ENSP00000296503,ENSP00000305480,ENSP00000343535,ENSP00000347689,ENSP00000348849,ENSP00000355315,ENSP00000357535,ENSP00000377492,ENSP00000377536,ENSP00000400467,ENSP00000401564,ENSP00000410758,ENSP00000420315,ENSP00000449328	ABHD6,AHCY,CCNB1,ECHS1,FEN1,HMGB2,HMMR,KEAP1,KPNB1,LSM5,PDE4C,PTTG1,RANBP1,RPL39,RPL9,RPLP0,RPS26,USP7,VMP1,ZFP36L2
GO:2000112	regulation of cellular macromolecule biosynthetic process	39	4050	0.0430	ENSP00000171111,ENSP00000220429,ENSP00000254810,ENSP00000262027,ENSP00000262375,ENSP00000262948,ENSP00000265753,ENSP00000282388,ENSP00000296503,ENSP00000301633,ENSP00000314129,ENSP00000317272,ENSP00000332706,ENSP00000342307,ENSP00000342434,ENSP00000343535,ENSP00000355778,ENSP00000355922,ENSP00000357914,ENSP00000360608,ENSP00000370010,ENSP00000372351,ENSP00000373952,ENSP00000376272,ENSP00000376924…	BAZ1B,BCL7A,BIRC5,BRCA1,BRF1,CDC45,CENPF,DNAJA3,EIF4H,EPHA5,FANCA,FOXM1,GABPB1,GABPB2,GRIN1,H2AFX,H3F3A,H3F3B,HMGB2,HOXC4,KEAP1,MAP2K2,MARS,MECP2,MET,NRF1,PAXIP1,PPP1R12A,PTTG1,PURA,RFC4,SMARCA4,SPIB,TAF15,TFE3,TMSB4X,USP7,WHSC1,ZFP36L2
GO:0016540	protein autoprocessing	2	14	0.0433	ENSP00000269143,ENSP00000350911	AFG3L2,CTSE
GO:0000070	mitotic sister chromatid segregation	4	101	0.0437	ENSP00000256442,ENSP00000290158,ENSP00000363524,ENSP00000404190	CCNB1,KIF4A,KPNB1,RACGAP1
GO:0006282	regulation of DNA repair	4	101	0.0437	ENSP00000342307,ENSP00000372351,ENSP00000418960,ENSP00000434024	BRCA1,FOXM1,H2AFX,WHSC1
GO:0006606	protein import into nucleus	4	101	0.0437	ENSP00000290158,ENSP00000354742,ENSP00000357283,ENSP00000401564	IPO9,KPNB1,LMNA,RANBP1
GO:0000281	mitotic cytokinesis	3	50	0.0440	ENSP00000301633,ENSP00000363524,ENSP00000404190	BIRC5,KIF4A,RACGAP1
GO:0032091	negative regulation of protein binding	4	102	0.0440	ENSP00000293288,ENSP00000317272,ENSP00000349960,ENSP00000378974	ACTB,BAX,MAPK8,MET
GO:0034508	centromere complex assembly	3	50	0.0440	ENSP00000254810,ENSP00000355778,ENSP00000355922	CENPF,H3F3A,H3F3B
GO:0009889	regulation of biosynthetic process	41	4337	0.0444	ENSP00000171111,ENSP00000220429,ENSP00000254810,ENSP00000262027,ENSP00000262375,ENSP00000262948,ENSP00000265753,ENSP00000282388,ENSP00000290158,ENSP00000296503,ENSP00000301633,ENSP00000314129,ENSP00000317272,ENSP00000332706,ENSP00000342307,ENSP00000342434,ENSP00000343535,ENSP00000355778,ENSP00000355922,ENSP00000357914,ENSP00000360608,ENSP00000370010,ENSP00000372351,ENSP00000373952,ENSP00000376272…	ABHD6,BAZ1B,BCL7A,BIRC5,BRCA1,BRF1,CDC45,CENPF,DNAJA3,EIF4H,EPHA5,FANCA,FOXM1,GABPB1,GABPB2,GRIN1,H2AFX,H3F3A,H3F3B,HMGB2,HOXC4,KEAP1,KPNB1,MAP2K2,MARS,MECP2,MET,NRF1,PAXIP1,PPP1R12A,PTTG1,PURA,RFC4,SMARCA4,SPIB,TAF15,TFE3,TMSB4X,USP7,WHSC1,ZFP36L2
GO:0060968	regulation of gene silencing	4	103	0.0452	ENSP00000254810,ENSP00000262948,ENSP00000355778,ENSP00000405726	CDC45,H3F3A,H3F3B,MAP2K2
GO:0006301	postreplication repair	3	51	0.0454	ENSP00000300035,ENSP00000376272,ENSP00000418960	BRCA1,KIAA0101,RFC4
GO:0035065	regulation of histone acetylation	3	51	0.0454	ENSP00000384048,ENSP00000395535,ENSP00000418960	BRCA1,MECP2,PAXIP1
GO:0045815	positive regulation of gene expression, epigenetic	3	51	0.0454	ENSP00000342434,ENSP00000349960,ENSP00000352834	ACTB,BAZ1B,MYO1C
GO:0051310	metaphase plate congression	3	51	0.0454	ENSP00000256442,ENSP00000290158,ENSP00000355922	CCNB1,CENPF,KPNB1
GO:0072657	protein localization to membrane	8	405	0.0456	ENSP00000262375,ENSP00000293288,ENSP00000348849,ENSP00000352834,ENSP00000355315,ENSP00000360608,ENSP00000400467,ENSP00000449328	BAX,DNAJA3,GRIN1,MYO1C,RPL39,RPL9,RPLP0,RPS26
GO:0043604	amide biosynthetic process	9	495	0.0457	ENSP00000262027,ENSP00000265753,ENSP00000296102,ENSP00000331901,ENSP00000348849,ENSP00000355315,ENSP00000369134,ENSP00000400467,ENSP00000449328	EEF1G,EIF4H,MARS,MRPL33,PDHA1,RPL39,RPL9,RPLP0,RPS26
GO:0006309	apoptotic DNA fragmentation	2	15	0.0459	ENSP00000290158,ENSP00000296503	HMGB2,KPNB1
GO:0070231	T cell apoptotic process	2	15	0.0459	ENSP00000262375,ENSP00000293288	BAX,DNAJA3
GO:2001028	positive regulation of endothelial cell chemotaxis	2	15	0.0459	ENSP00000317272,ENSP00000370010	MET,TMSB4X
GO:0045739	positive regulation of DNA repair	3	53	0.0484	ENSP00000342307,ENSP00000418960,ENSP00000434024	BRCA1,FOXM1,H2AFX
Cellular components
#term ID	term description	observed gene count	background gene count	false discovery rate	matching proteins in your network (IDs)	matching proteins in your network (labels)
GO:0044422	organelle part	97	9111	1.65e-09	ENSP00000017003,ENSP00000171111,ENSP00000216122,ENSP00000220429,ENSP00000225927,ENSP00000237163,ENSP00000240316,ENSP00000242257,ENSP00000254654,ENSP00000254810,ENSP00000256442,ENSP00000256682,ENSP00000261558,ENSP00000262027,ENSP00000262105,ENSP00000262291,ENSP00000262300,ENSP00000262302,ENSP00000262375,ENSP00000262948,ENSP00000264595,ENSP00000265056,ENSP00000269143,ENSP00000285968,ENSP00000288207…	ACTB,ACTR1A,AFG3L2,AGA,AP5M1,ARF3,ATP7A,B4GALT2,BAX,BAZ1B,BIRC5,BRCA1,BRF1,CCNB1,CCNB2,CDC45,CENPF,COIL,CXCR2,DNAJA3,DOPEY1,ECHS1,FANCA,FEN1,FH,FOXM1,FTSJ2,GABPB1,GCA,GCNT2,GHITM,GLRX3,GRIN1,GTSE1,H2AFX,H3F3A,H3F3B,HAUS5,HMGB2,HMMR,ILKAP,IPO9,KEAP1,KIAA0101,KIF4A,KPNB1,LMNA,LSM5,MAP2K2,MAPK8,MARS,MCM2,MCM4,MCM5,MECP2,MKI67,MLH3,MRPL33,MUC5AC,MYO1C,NAGLU,NCAPG2,NRF1,NUBP2,NUP205,PAFAH1B1,PAXIP1,PD…
GO:0005622	intracellular	121	14286	1.91e-09	ENSP00000017003,ENSP00000171111,ENSP00000216122,ENSP00000217426,ENSP00000220003,ENSP00000220429,ENSP00000225927,ENSP00000237163,ENSP00000240316,ENSP00000242257,ENSP00000254654,ENSP00000254810,ENSP00000256442,ENSP00000256682,ENSP00000257909,ENSP00000261558,ENSP00000262027,ENSP00000262105,ENSP00000262291,ENSP00000262300,ENSP00000262302,ENSP00000262375,ENSP00000262948,ENSP00000264595,ENSP00000265056…	ABHD6,ACTB,ACTR1A,AFG3L2,AGA,AHCY,AK1,AP5M1,ARF3,ATP7A,B4GALT2,BAG5,BAX,BAZ1B,BIRC5,BORA,BRCA1,BRF1,CCNB1,CCNB2,CDC45,CENPF,COIL,CSK,CTSE,CXCR2,DCUN1D2,DNAJA3,DOPEY1,ECHS1,EEF1G,EIF4H,EPB41L4B,EPHA5,FANCA,FEN1,FH,FOXM1,FTSJ2,GABPB1,GABPB2,GCA,GCNT2,GHITM,GLRX3,GRIN1,GTSE1,H2AFX,H3F3A,H3F3B,HAUS5,HMGB2,HMMR,HOXC4,ILKAP,IPO9,KEAP1,KIAA0101,KIF4A,KPNB1,LMNA,LSM5,MAP2K2,MAPK8,MARS,MCM2,MCM4,MCM5,MECP…
GO:0043232	intracellular non-membrane-bounded organelle	60	4005	1.91e-09	ENSP00000171111,ENSP00000220429,ENSP00000240316,ENSP00000242257,ENSP00000254810,ENSP00000256442,ENSP00000262027,ENSP00000262291,ENSP00000262300,ENSP00000262302,ENSP00000262375,ENSP00000262948,ENSP00000265056,ENSP00000288207,ENSP00000290158,ENSP00000296102,ENSP00000296503,ENSP00000300035,ENSP00000301072,ENSP00000301633,ENSP00000305480,ENSP00000326550,ENSP00000332706,ENSP00000336799,ENSP00000342434…	ACTB,ACTR1A,BAZ1B,BIRC5,BRCA1,CCNB1,CCNB2,CDC45,CENPF,COIL,DNAJA3,EPB41L4B,FEN1,FTSJ2,GABPB1,GLRX3,GTSE1,H2AFX,H3F3A,H3F3B,HAUS5,HMGB2,HMMR,KEAP1,KIAA0101,KIF4A,KPNB1,LMNA,MAP2K2,MARS,MCM2,MECP2,MKI67,MLH3,MRPL33,MYO1C,NCAPG2,NUBP2,PAFAH1B1,PAXIP1,PDHA1,PKMYT1,PPP1R12A,PURA,RACGAP1,RANBP1,RFC4,RPL39,RPL9,RPLP0,RPS26,SMARCA4,SPRY2,TACC3,TMSB4X,TUBA1B,TUBA1C,USP7,VMP1,WHSC1
GO:0044424	intracellular part	120	13996	1.91e-09	ENSP00000017003,ENSP00000171111,ENSP00000216122,ENSP00000217426,ENSP00000220003,ENSP00000220429,ENSP00000225927,ENSP00000237163,ENSP00000240316,ENSP00000242257,ENSP00000254654,ENSP00000254810,ENSP00000256442,ENSP00000256682,ENSP00000257909,ENSP00000261558,ENSP00000262027,ENSP00000262105,ENSP00000262291,ENSP00000262300,ENSP00000262302,ENSP00000262375,ENSP00000262948,ENSP00000264595,ENSP00000265056…	ABHD6,ACTB,ACTR1A,AFG3L2,AGA,AHCY,AK1,AP5M1,ARF3,ATP7A,B4GALT2,BAG5,BAX,BAZ1B,BIRC5,BORA,BRCA1,BRF1,CCNB1,CCNB2,CDC45,CENPF,COIL,CSK,CTSE,CXCR2,DCUN1D2,DNAJA3,DOPEY1,ECHS1,EEF1G,EIF4H,EPB41L4B,EPHA5,FANCA,FEN1,FH,FOXM1,FTSJ2,GABPB1,GABPB2,GCA,GCNT2,GHITM,GLRX3,GRIN1,GTSE1,H2AFX,H3F3A,H3F3B,HAUS5,HMGB2,HMMR,HOXC4,ILKAP,IPO9,KEAP1,KIAA0101,KIF4A,KPNB1,LMNA,LSM5,MAP2K2,MAPK8,MARS,MCM2,MCM4,MCM5,MECP…
GO:0044446	intracellular organelle part	95	8882	1.91e-09	ENSP00000017003,ENSP00000171111,ENSP00000216122,ENSP00000220429,ENSP00000225927,ENSP00000237163,ENSP00000240316,ENSP00000242257,ENSP00000254654,ENSP00000254810,ENSP00000256442,ENSP00000256682,ENSP00000261558,ENSP00000262027,ENSP00000262105,ENSP00000262291,ENSP00000262300,ENSP00000262302,ENSP00000262375,ENSP00000262948,ENSP00000264595,ENSP00000265056,ENSP00000269143,ENSP00000285968,ENSP00000288207…	ACTB,ACTR1A,AFG3L2,AGA,AP5M1,ARF3,ATP7A,B4GALT2,BAX,BAZ1B,BIRC5,BRCA1,BRF1,CCNB1,CCNB2,CDC45,CENPF,COIL,CXCR2,DNAJA3,DOPEY1,ECHS1,FANCA,FEN1,FH,FOXM1,FTSJ2,GABPB1,GCA,GCNT2,GHITM,GTSE1,H2AFX,H3F3A,H3F3B,HAUS5,HMGB2,HMMR,ILKAP,IPO9,KEAP1,KIAA0101,KIF4A,KPNB1,LMNA,LSM5,MAP2K2,MAPK8,MARS,MCM2,MCM4,MCM5,MECP2,MKI67,MLH3,MRPL33,MUC5AC,MYO1C,NAGLU,NCAPG2,NRF1,NUBP2,NUP205,PAFAH1B1,PAXIP1,PDHA1,PKMYT1,P…
GO:0005634	nucleus	81	6892	2.42e-09	ENSP00000171111,ENSP00000216122,ENSP00000217426,ENSP00000220429,ENSP00000240316,ENSP00000242257,ENSP00000254654,ENSP00000254810,ENSP00000256442,ENSP00000262027,ENSP00000262105,ENSP00000262291,ENSP00000262300,ENSP00000262302,ENSP00000262375,ENSP00000262948,ENSP00000265056,ENSP00000282388,ENSP00000285968,ENSP00000288207,ENSP00000290158,ENSP00000293288,ENSP00000296503,ENSP00000298048,ENSP00000300035…	ACTB,AHCY,ATP7A,B4GALT2,BAG5,BAX,BAZ1B,BIRC5,BRCA1,BRF1,CCNB1,CCNB2,CDC45,CENPF,COIL,DNAJA3,FANCA,FEN1,FOXM1,FTSJ2,GABPB1,GABPB2,GLRX3,GTSE1,H2AFX,H3F3A,H3F3B,HMGB2,HOXC4,ILKAP,IPO9,KEAP1,KIAA0101,KIF4A,KPNB1,LMNA,LSM5,MAP2K2,MAPK8,MARS,MCM2,MCM4,MCM5,MECP2,MELK,MKI67,MLH3,MYO1C,NCAPG2,NRF1,NUBP2,NUP205,PAFAH1B1,PAXIP1,PDHA1,PKMYT1,PPP1R12A,PTTG1,PURA,RACGAP1,RANBP1,RBMX2,RFC4,RGS3,RPLP0,RPS26,SB…
GO:0044428	nuclear part	62	4359	2.42e-09	ENSP00000171111,ENSP00000216122,ENSP00000220429,ENSP00000240316,ENSP00000242257,ENSP00000254654,ENSP00000254810,ENSP00000256442,ENSP00000262027,ENSP00000262105,ENSP00000262291,ENSP00000262300,ENSP00000265056,ENSP00000285968,ENSP00000290158,ENSP00000293288,ENSP00000296503,ENSP00000300035,ENSP00000300128,ENSP00000301633,ENSP00000301740,ENSP00000305480,ENSP00000310696,ENSP00000312981,ENSP00000314129…	ACTB,B4GALT2,BAX,BAZ1B,BIRC5,BRCA1,BRF1,CCNB1,CDC45,CENPF,COIL,FANCA,FEN1,FOXM1,FTSJ2,GABPB1,GTSE1,H2AFX,H3F3A,H3F3B,HMGB2,ILKAP,IPO9,KEAP1,KIAA0101,KIF4A,KPNB1,LMNA,LSM5,MAPK8,MARS,MCM2,MCM4,MCM5,MKI67,MLH3,MYO1C,NCAPG2,NRF1,NUP205,PAFAH1B1,PAXIP1,PDHA1,PKMYT1,PPP1R12A,PURA,RACGAP1,RANBP1,RBMX2,RFC4,RGS3,RPS26,SBF1,SMARCA4,SRRM2,TAF15,TFE3,TMEM194A,USP39,USP7,VMP1,WHSC1
GO:0043229	intracellular organelle	110	12193	2.27e-08	ENSP00000017003,ENSP00000171111,ENSP00000216122,ENSP00000217426,ENSP00000220429,ENSP00000225927,ENSP00000237163,ENSP00000240316,ENSP00000242257,ENSP00000254654,ENSP00000254810,ENSP00000256442,ENSP00000256682,ENSP00000261558,ENSP00000262027,ENSP00000262105,ENSP00000262291,ENSP00000262300,ENSP00000262302,ENSP00000262375,ENSP00000262948,ENSP00000264595,ENSP00000265056,ENSP00000269143,ENSP00000282388…	ABHD6,ACTB,ACTR1A,AFG3L2,AGA,AHCY,AP5M1,ARF3,ATP7A,B4GALT2,BAG5,BAX,BAZ1B,BIRC5,BRCA1,BRF1,CCNB1,CCNB2,CDC45,CENPF,COIL,CTSE,CXCR2,DNAJA3,DOPEY1,ECHS1,EPB41L4B,EPHA5,FANCA,FEN1,FH,FOXM1,FTSJ2,GABPB1,GABPB2,GCA,GCNT2,GHITM,GLRX3,GRIN1,GTSE1,H2AFX,H3F3A,H3F3B,HAUS5,HMGB2,HMMR,HOXC4,ILKAP,IPO9,KEAP1,KIAA0101,KIF4A,KPNB1,LMNA,LSM5,MAP2K2,MAPK8,MARS,MCM2,MCM4,MCM5,MECP2,MELK,MKI67,MLH3,MRPL33,MUC5AC,M…
GO:0043226	organelle	111	12432	2.54e-08	ENSP00000017003,ENSP00000171111,ENSP00000216122,ENSP00000217426,ENSP00000220429,ENSP00000225927,ENSP00000237163,ENSP00000240316,ENSP00000242257,ENSP00000254654,ENSP00000254810,ENSP00000256442,ENSP00000256682,ENSP00000261558,ENSP00000262027,ENSP00000262105,ENSP00000262291,ENSP00000262300,ENSP00000262302,ENSP00000262375,ENSP00000262948,ENSP00000264595,ENSP00000265056,ENSP00000269143,ENSP00000282388…	ABHD6,ACTB,ACTR1A,AFG3L2,AGA,AHCY,AP5M1,ARF3,ATP7A,B4GALT2,BAG5,BAX,BAZ1B,BIRC5,BRCA1,BRF1,CCNB1,CCNB2,CDC45,CENPF,COIL,CTSE,CXCR2,DNAJA3,DOPEY1,ECHS1,EPB41L4B,EPHA5,FANCA,FEN1,FH,FOXM1,FTSJ2,GABPB1,GABPB2,GCA,GCNT2,GHITM,GLRX3,GRIN1,GTSE1,H2AFX,H3F3A,H3F3B,HAUS5,HMGB2,HMMR,HOXC4,ILKAP,IPO9,KEAP1,KIAA0101,KIF4A,KPNB1,LMNA,LSM5,MAP2K2,MAPK8,MARS,MCM2,MCM4,MCM5,MECP2,MELK,MKI67,MLH3,MRPL33,MUC5AC,M…
GO:0043231	intracellular membrane-bounded organelle	100	10365	3.23e-08	ENSP00000017003,ENSP00000171111,ENSP00000216122,ENSP00000217426,ENSP00000220429,ENSP00000225927,ENSP00000237163,ENSP00000240316,ENSP00000242257,ENSP00000254654,ENSP00000254810,ENSP00000256442,ENSP00000256682,ENSP00000261558,ENSP00000262027,ENSP00000262105,ENSP00000262291,ENSP00000262300,ENSP00000262302,ENSP00000262375,ENSP00000262948,ENSP00000264595,ENSP00000265056,ENSP00000269143,ENSP00000282388…	ABHD6,ACTB,AFG3L2,AGA,AHCY,AP5M1,ARF3,ATP7A,B4GALT2,BAG5,BAX,BAZ1B,BIRC5,BRCA1,BRF1,CCNB1,CCNB2,CDC45,CENPF,COIL,CXCR2,DNAJA3,DOPEY1,ECHS1,EPHA5,FANCA,FEN1,FH,FOXM1,FTSJ2,GABPB1,GABPB2,GCA,GCNT2,GHITM,GLRX3,GRIN1,GTSE1,H2AFX,H3F3A,H3F3B,HMGB2,HOXC4,ILKAP,IPO9,KEAP1,KIAA0101,KIF4A,KPNB1,LMNA,LSM5,MAP2K2,MAPK8,MARS,MCM2,MCM4,MCM5,MECP2,MELK,MKI67,MLH3,MRPL33,MUC5AC,MYO1C,NAGLU,NCAPG2,NRF1,NUBP2,NUP…
GO:0031981	nuclear lumen	56	4030	6.65e-08	ENSP00000171111,ENSP00000216122,ENSP00000220429,ENSP00000240316,ENSP00000242257,ENSP00000254654,ENSP00000254810,ENSP00000256442,ENSP00000262027,ENSP00000262105,ENSP00000262291,ENSP00000262300,ENSP00000265056,ENSP00000285968,ENSP00000290158,ENSP00000296503,ENSP00000300035,ENSP00000301633,ENSP00000301740,ENSP00000305480,ENSP00000310696,ENSP00000312981,ENSP00000314129,ENSP00000332706,ENSP00000342307…	ACTB,B4GALT2,BAZ1B,BIRC5,BRCA1,BRF1,CCNB1,CDC45,CENPF,COIL,FANCA,FEN1,FOXM1,FTSJ2,GABPB1,GTSE1,H2AFX,H3F3A,H3F3B,HMGB2,ILKAP,KEAP1,KIAA0101,KIF4A,KPNB1,LMNA,LSM5,MAPK8,MARS,MCM2,MCM4,MCM5,MKI67,MLH3,MYO1C,NCAPG2,NRF1,NUP205,PAXIP1,PDHA1,PKMYT1,PPP1R12A,PURA,RACGAP1,RFC4,RGS3,RPS26,SBF1,SMARCA4,SRRM2,TAF15,TFE3,USP39,USP7,VMP1,WHSC1
GO:0070013	intracellular organelle lumen	65	5162	6.65e-08	ENSP00000171111,ENSP00000216122,ENSP00000220429,ENSP00000225927,ENSP00000240316,ENSP00000242257,ENSP00000254654,ENSP00000254810,ENSP00000256442,ENSP00000262027,ENSP00000262105,ENSP00000262291,ENSP00000262300,ENSP00000262375,ENSP00000264595,ENSP00000265056,ENSP00000285968,ENSP00000290158,ENSP00000296102,ENSP00000296503,ENSP00000300035,ENSP00000301633,ENSP00000301740,ENSP00000305480,ENSP00000310696…	ACTB,AGA,B4GALT2,BAZ1B,BIRC5,BRCA1,BRF1,CCNB1,CDC45,CENPF,COIL,DNAJA3,ECHS1,FANCA,FEN1,FH,FOXM1,FTSJ2,GABPB1,GCA,GTSE1,H2AFX,H3F3A,H3F3B,HMGB2,ILKAP,KEAP1,KIAA0101,KIF4A,KPNB1,LMNA,LSM5,MAPK8,MARS,MCM2,MCM4,MCM5,MKI67,MLH3,MRPL33,MUC5AC,MYO1C,NAGLU,NCAPG2,NRF1,NUP205,PAXIP1,PDHA1,PKMYT1,PPP1R12A,PURA,RACGAP1,RFC4,RGS3,RPS26,SBF1,SMARCA4,SRRM2,TAF15,TFE3,TMSB4X,USP39,USP7,VMP1,WHSC1
GO:0043227	membrane-bounded organelle	103	11244	2.02e-07	ENSP00000017003,ENSP00000171111,ENSP00000216122,ENSP00000217426,ENSP00000220429,ENSP00000225927,ENSP00000237163,ENSP00000240316,ENSP00000242257,ENSP00000254654,ENSP00000254810,ENSP00000256442,ENSP00000256682,ENSP00000261558,ENSP00000262027,ENSP00000262105,ENSP00000262291,ENSP00000262300,ENSP00000262302,ENSP00000262375,ENSP00000262948,ENSP00000264595,ENSP00000265056,ENSP00000269143,ENSP00000282388…	ABHD6,ACTB,ACTR1A,AFG3L2,AGA,AHCY,AP5M1,ARF3,ATP7A,B4GALT2,BAG5,BAX,BAZ1B,BIRC5,BRCA1,BRF1,CCNB1,CCNB2,CDC45,CENPF,COIL,CTSE,CXCR2,DNAJA3,DOPEY1,ECHS1,EPHA5,FANCA,FEN1,FH,FOXM1,FTSJ2,GABPB1,GABPB2,GCA,GCNT2,GHITM,GLRX3,GRIN1,GTSE1,H2AFX,H3F3A,H3F3B,HMGB2,HOXC4,ILKAP,IPO9,KEAP1,KIAA0101,KIF4A,KPNB1,LMNA,LSM5,MAP2K2,MAPK8,MARS,MCM2,MCM4,MCM5,MECP2,MELK,MKI67,MLH3,MRPL33,MUC5AC,MYO1C,NAGLU,NCAPG2,NR…
GO:0005694	chromosome	24	950	3.04e-07	ENSP00000254810,ENSP00000256442,ENSP00000265056,ENSP00000296503,ENSP00000301633,ENSP00000332706,ENSP00000342434,ENSP00000343535,ENSP00000348020,ENSP00000355778,ENSP00000355922,ENSP00000357643,ENSP00000363524,ENSP00000372351,ENSP00000376272,ENSP00000380378,ENSP00000384048,ENSP00000387007,ENSP00000389168,ENSP00000395535,ENSP00000395654,ENSP00000405726,ENSP00000418960,ENSP00000434024	BAZ1B,BIRC5,BRCA1,CCNB1,CDC45,CENPF,H2AFX,H3F3A,H3F3B,HMGB2,KIF4A,MCM2,MECP2,MKI67,MLH3,NCAPG2,PAFAH1B1,PAXIP1,PPP1R12A,PURA,RFC4,SMARCA4,USP7,WHSC1
GO:0005654	nucleoplasm	49	3446	4.32e-07	ENSP00000171111,ENSP00000216122,ENSP00000220429,ENSP00000240316,ENSP00000254654,ENSP00000254810,ENSP00000256442,ENSP00000262105,ENSP00000262300,ENSP00000265056,ENSP00000290158,ENSP00000296503,ENSP00000300035,ENSP00000301633,ENSP00000301740,ENSP00000305480,ENSP00000310696,ENSP00000312981,ENSP00000314129,ENSP00000342307,ENSP00000342434,ENSP00000343535,ENSP00000348849,ENSP00000349960,ENSP00000352834…	ACTB,B4GALT2,BAZ1B,BIRC5,BRCA1,BRF1,CCNB1,CDC45,CENPF,COIL,FANCA,FEN1,FOXM1,GABPB1,GTSE1,H2AFX,H3F3A,H3F3B,HMGB2,ILKAP,KEAP1,KIAA0101,KIF4A,KPNB1,LMNA,LSM5,MAPK8,MCM2,MCM4,MCM5,MKI67,MYO1C,NCAPG2,NRF1,PAXIP1,PKMYT1,PPP1R12A,RACGAP1,RFC4,RGS3,RPS26,SBF1,SMARCA4,SRRM2,TAF15,TFE3,USP39,USP7,WHSC1
GO:0015630	microtubule cytoskeleton	25	1118	1.34e-06	ENSP00000171111,ENSP00000256442,ENSP00000262302,ENSP00000262948,ENSP00000265056,ENSP00000288207,ENSP00000300035,ENSP00000301072,ENSP00000301633,ENSP00000326550,ENSP00000336799,ENSP00000355922,ENSP00000358921,ENSP00000363524,ENSP00000366306,ENSP00000377492,ENSP00000380378,ENSP00000389168,ENSP00000401564,ENSP00000404190,ENSP00000405726,ENSP00000415430,ENSP00000418960,ENSP00000434024,ENSP00000439056	ACTR1A,BIRC5,BRCA1,CCNB1,CCNB2,CDC45,CENPF,GTSE1,H2AFX,HAUS5,HMMR,KEAP1,KIAA0101,KIF4A,MAP2K2,MCM2,NUBP2,PAFAH1B1,PPP1R12A,RACGAP1,RANBP1,SPRY2,TACC3,TUBA1B,TUBA1C
GO:0005829	cytosol	58	4958	1.05e-05	ENSP00000171111,ENSP00000216122,ENSP00000217426,ENSP00000220003,ENSP00000237163,ENSP00000254654,ENSP00000256442,ENSP00000261558,ENSP00000262027,ENSP00000262300,ENSP00000262375,ENSP00000262948,ENSP00000265753,ENSP00000282388,ENSP00000288207,ENSP00000290158,ENSP00000293288,ENSP00000301633,ENSP00000314129,ENSP00000326550,ENSP00000331901,ENSP00000338814,ENSP00000343535,ENSP00000345728,ENSP00000347689…	ACTB,ACTR1A,AHCY,AK1,AP5M1,ATP7A,BAG5,BAX,BIRC5,BORA,CCNB1,CCNB2,CENPF,CSK,DNAJA3,DOPEY1,EEF1G,EIF4H,EPB41L4B,GCA,GLRX3,GTSE1,HAUS5,HMMR,ILKAP,IPO9,KEAP1,KIF4A,KPNB1,LMNA,LSM5,MAP2K2,MAPK8,MARS,MCM5,MECP2,MYO1C,NRF1,PAFAH1B1,PDE4C,PHKA1,PKMYT1,PPP1R12A,PTTG1,RACGAP1,RANBP1,RGS3,RPL39,RPL9,RPLP0,RPS26,SBF1,SPRY2,TACC3,TFE3,TMSB4X,USP7,ZFP36L2
GO:0044444	cytoplasmic part	88	9377	1.26e-05	ENSP00000017003,ENSP00000171111,ENSP00000216122,ENSP00000217426,ENSP00000220003,ENSP00000220429,ENSP00000225927,ENSP00000237163,ENSP00000242257,ENSP00000254654,ENSP00000256442,ENSP00000256682,ENSP00000261558,ENSP00000262027,ENSP00000262291,ENSP00000262300,ENSP00000262302,ENSP00000262375,ENSP00000262948,ENSP00000264595,ENSP00000265753,ENSP00000269143,ENSP00000282388,ENSP00000288207,ENSP00000290158…	ABHD6,ACTB,ACTR1A,AFG3L2,AGA,AHCY,AK1,AP5M1,ARF3,ATP7A,B4GALT2,BAG5,BAX,BIRC5,BORA,BRCA1,CCNB1,CCNB2,CENPF,CSK,CTSE,CXCR2,DNAJA3,DOPEY1,ECHS1,EEF1G,EIF4H,EPB41L4B,EPHA5,FEN1,FH,FTSJ2,GABPB1,GCA,GCNT2,GHITM,GLRX3,GRIN1,GTSE1,HAUS5,HMGB2,HMMR,ILKAP,IPO9,KEAP1,KIAA0101,KIF4A,KPNB1,LMNA,LSM5,MAP2K2,MAPK8,MARS,MCM5,MECP2,MELK,MRPL33,MUC5AC,MYO1C,NAGLU,NRF1,NUBP2,PAFAH1B1,PDE4C,PDHA1,PHKA1,PKMYT1,PPP1R…
GO:0005737	cytoplasm	98	11238	3.04e-05	ENSP00000017003,ENSP00000171111,ENSP00000216122,ENSP00000217426,ENSP00000220003,ENSP00000220429,ENSP00000225927,ENSP00000237163,ENSP00000242257,ENSP00000254654,ENSP00000256442,ENSP00000256682,ENSP00000257909,ENSP00000261558,ENSP00000262027,ENSP00000262291,ENSP00000262300,ENSP00000262302,ENSP00000262375,ENSP00000262948,ENSP00000264595,ENSP00000265056,ENSP00000265753,ENSP00000269143,ENSP00000282388…	ABHD6,ACTB,ACTR1A,AFG3L2,AGA,AHCY,AK1,AP5M1,ARF3,ATP7A,B4GALT2,BAG5,BAX,BIRC5,BORA,BRCA1,CCNB1,CCNB2,CDC45,CENPF,CSK,CTSE,CXCR2,DNAJA3,DOPEY1,ECHS1,EEF1G,EIF4H,EPB41L4B,EPHA5,FANCA,FEN1,FH,FTSJ2,GABPB1,GCA,GCNT2,GHITM,GLRX3,GRIN1,GTSE1,HAUS5,HMGB2,HMMR,ILKAP,IPO9,KEAP1,KIAA0101,KIF4A,KPNB1,LMNA,LSM5,MAP2K2,MAPK8,MARS,MCM2,MCM5,MECP2,MELK,MRPL33,MUC5AC,MYO1C,NAGLU,NRF1,NUBP2,PAFAH1B1,PDE4C,PDHA1,P…
GO:0044464	cell part	122	16244	3.04e-05	ENSP00000017003,ENSP00000171111,ENSP00000216122,ENSP00000217426,ENSP00000220003,ENSP00000220429,ENSP00000225927,ENSP00000237163,ENSP00000240316,ENSP00000242257,ENSP00000254654,ENSP00000254810,ENSP00000256442,ENSP00000256682,ENSP00000257909,ENSP00000261558,ENSP00000262027,ENSP00000262105,ENSP00000262291,ENSP00000262300,ENSP00000262302,ENSP00000262375,ENSP00000262948,ENSP00000264595,ENSP00000265056…	ABHD6,ACTB,ACTR1A,AFG3L2,AGA,AHCY,AK1,AP5M1,ARF3,ATP7A,B4GALT2,BAG5,BAX,BAZ1B,BIRC5,BORA,BRCA1,BRF1,CCNB1,CCNB2,CDC45,CENPF,COIL,CSK,CTSE,CXCR2,DCUN1D2,DNAJA3,DOPEY1,ECHS1,EEF1G,EIF4H,EPB41L4B,EPHA5,FAM57A,FANCA,FEN1,FH,FOXM1,FTSJ2,GABPB1,GABPB2,GCA,GCNT2,GHITM,GLRX3,GRIN1,GTSE1,H2AFX,H3F3A,H3F3B,HAUS5,HMGB2,HMMR,HOXC4,ILKAP,IPO9,KEAP1,KIAA0101,KIF4A,KPNB1,LMNA,LSM5,MAP2K2,MAPK8,MARS,MCM2,MCM4,MC…
GO:0044427	chromosomal part	19	819	3.06e-05	ENSP00000254810,ENSP00000256442,ENSP00000265056,ENSP00000296503,ENSP00000301633,ENSP00000332706,ENSP00000342434,ENSP00000348020,ENSP00000355778,ENSP00000355922,ENSP00000376272,ENSP00000380378,ENSP00000387007,ENSP00000389168,ENSP00000395535,ENSP00000395654,ENSP00000405726,ENSP00000418960,ENSP00000434024	BAZ1B,BIRC5,BRCA1,CCNB1,CDC45,CENPF,H2AFX,H3F3A,H3F3B,HMGB2,MCM2,MECP2,MLH3,NCAPG2,PAFAH1B1,PPP1R12A,PURA,RFC4,SMARCA4
GO:0032991	protein-containing complex	55	4792	3.89e-05	ENSP00000171111,ENSP00000216122,ENSP00000220429,ENSP00000254810,ENSP00000256442,ENSP00000261558,ENSP00000262027,ENSP00000262105,ENSP00000265056,ENSP00000265753,ENSP00000269143,ENSP00000285968,ENSP00000290158,ENSP00000293288,ENSP00000296102,ENSP00000296503,ENSP00000301633,ENSP00000301740,ENSP00000305480,ENSP00000312981,ENSP00000332706,ENSP00000339090,ENSP00000343535,ENSP00000348020,ENSP00000348849…	ABHD6,ACTB,ACTR1A,AFG3L2,AP5M1,BAX,BIRC5,BRCA1,BRF1,CCNB1,CDC45,CENPF,DCUN1D2,EIF4H,FANCA,FEN1,FH,GABPB1,GRIN1,H2AFX,H3F3A,H3F3B,HAUS5,HMGB2,KEAP1,KIF4A,KPNB1,LSM5,MARS,MCM2,MCM4,MCM5,MLH3,MRPL33,MYO1C,NCAPG2,NUP205,PAFAH1B1,PAXIP1,PDHA1,PHKA1,PPP1R12A,PRPS2,PURA,RACGAP1,RBMX2,RFC4,RPL39,RPL9,RPLP0,RPS26,SMARCA4,SRRM2,USP39,USP7
GO:0005815	microtubule organizing center	17	683	4.09e-05	ENSP00000171111,ENSP00000256442,ENSP00000262302,ENSP00000288207,ENSP00000300035,ENSP00000301633,ENSP00000326550,ENSP00000355922,ENSP00000358921,ENSP00000377492,ENSP00000380378,ENSP00000389168,ENSP00000401564,ENSP00000405726,ENSP00000418960,ENSP00000434024,ENSP00000439056	ACTR1A,BIRC5,BRCA1,CCNB1,CCNB2,CDC45,CENPF,H2AFX,HAUS5,HMMR,KEAP1,KIAA0101,NUBP2,PAFAH1B1,PPP1R12A,RANBP1,TACC3
GO:0044430	cytoskeletal part	26	1547	9.90e-05	ENSP00000171111,ENSP00000256442,ENSP00000262302,ENSP00000262948,ENSP00000288207,ENSP00000300035,ENSP00000301072,ENSP00000301633,ENSP00000326550,ENSP00000336799,ENSP00000352834,ENSP00000355922,ENSP00000357283,ENSP00000358921,ENSP00000363524,ENSP00000366306,ENSP00000377492,ENSP00000380378,ENSP00000389168,ENSP00000401564,ENSP00000404190,ENSP00000405726,ENSP00000415430,ENSP00000418960,ENSP00000434024…	ACTR1A,BIRC5,BRCA1,CCNB1,CCNB2,CDC45,CENPF,GTSE1,H2AFX,HAUS5,HMMR,KEAP1,KIAA0101,KIF4A,LMNA,MAP2K2,MYO1C,NUBP2,PAFAH1B1,PPP1R12A,RACGAP1,RANBP1,SPRY2,TACC3,TUBA1B,TUBA1C
GO:0005813	centrosome	13	468	0.00021	ENSP00000256442,ENSP00000262302,ENSP00000288207,ENSP00000300035,ENSP00000355922,ENSP00000358921,ENSP00000377492,ENSP00000380378,ENSP00000389168,ENSP00000401564,ENSP00000405726,ENSP00000434024,ENSP00000439056	ACTR1A,CCNB1,CCNB2,CDC45,CENPF,H2AFX,HAUS5,HMMR,KIAA0101,NUBP2,PAFAH1B1,PPP1R12A,RANBP1
GO:0000793	condensed chromosome	9	215	0.00022	ENSP00000256442,ENSP00000296503,ENSP00000301633,ENSP00000342434,ENSP00000348020,ENSP00000355922,ENSP00000387007,ENSP00000418960,ENSP00000434024	BAZ1B,BIRC5,BRCA1,CCNB1,CENPF,H2AFX,HMGB2,MLH3,NCAPG2
GO:0005856	cytoskeleton	30	2068	0.00027	ENSP00000171111,ENSP00000256442,ENSP00000262302,ENSP00000262948,ENSP00000265056,ENSP00000288207,ENSP00000300035,ENSP00000301072,ENSP00000301633,ENSP00000326550,ENSP00000336799,ENSP00000349960,ENSP00000352834,ENSP00000355922,ENSP00000357283,ENSP00000358921,ENSP00000363524,ENSP00000363694,ENSP00000366306,ENSP00000370010,ENSP00000377492,ENSP00000380378,ENSP00000389168,ENSP00000401564,ENSP00000404190…	ACTB,ACTR1A,BIRC5,BRCA1,CCNB1,CCNB2,CDC45,CENPF,EPB41L4B,GTSE1,H2AFX,HAUS5,HMMR,KEAP1,KIAA0101,KIF4A,LMNA,MAP2K2,MCM2,MYO1C,NUBP2,PAFAH1B1,PPP1R12A,RACGAP1,RANBP1,SPRY2,TACC3,TMSB4X,TUBA1B,TUBA1C
GO:0042555	MCM complex	3	8	0.00059	ENSP00000216122,ENSP00000262105,ENSP00000265056	MCM2,MCM4,MCM5
GO:0098687	chromosomal region	9	272	0.0012	ENSP00000254810,ENSP00000256442,ENSP00000301633,ENSP00000332706,ENSP00000342434,ENSP00000355778,ENSP00000355922,ENSP00000380378,ENSP00000389168	BAZ1B,BIRC5,CCNB1,CENPF,H3F3A,H3F3B,PAFAH1B1,PPP1R12A,PURA
GO:0000228	nuclear chromosome	12	514	0.0020	ENSP00000254810,ENSP00000256442,ENSP00000265056,ENSP00000296503,ENSP00000301633,ENSP00000332706,ENSP00000348020,ENSP00000355778,ENSP00000395654,ENSP00000405726,ENSP00000418960,ENSP00000434024	BIRC5,BRCA1,CCNB1,CDC45,H2AFX,H3F3A,H3F3B,HMGB2,MCM2,MLH3,PURA,SMARCA4
GO:0005874	microtubule	10	385	0.0031	ENSP00000262948,ENSP00000301072,ENSP00000301633,ENSP00000336799,ENSP00000363524,ENSP00000366306,ENSP00000380378,ENSP00000404190,ENSP00000415430,ENSP00000439056	BIRC5,GTSE1,HAUS5,KIF4A,MAP2K2,PAFAH1B1,RACGAP1,SPRY2,TUBA1B,TUBA1C
GO:0005819	spindle	9	322	0.0037	ENSP00000256442,ENSP00000262302,ENSP00000301633,ENSP00000326550,ENSP00000355922,ENSP00000363524,ENSP00000380378,ENSP00000404190,ENSP00000439056	BIRC5,CCNB1,CENPF,HAUS5,KIF4A,NUBP2,PAFAH1B1,RACGAP1,TACC3
GO:0034399	nuclear periphery	6	134	0.0037	ENSP00000285968,ENSP00000290158,ENSP00000355922,ENSP00000357283,ENSP00000363524,ENSP00000384048	CENPF,KIF4A,KPNB1,LMNA,NUP205,PAXIP1
GO:0044454	nuclear chromosome part	11	480	0.0038	ENSP00000254810,ENSP00000256442,ENSP00000265056,ENSP00000296503,ENSP00000332706,ENSP00000348020,ENSP00000355778,ENSP00000395654,ENSP00000405726,ENSP00000418960,ENSP00000434024	BRCA1,CCNB1,CDC45,H2AFX,H3F3A,H3F3B,HMGB2,MCM2,MLH3,PURA,SMARCA4
GO:0099513	polymeric cytoskeletal fiber	13	645	0.0038	ENSP00000171111,ENSP00000262948,ENSP00000301072,ENSP00000301633,ENSP00000336799,ENSP00000352834,ENSP00000357283,ENSP00000363524,ENSP00000366306,ENSP00000380378,ENSP00000404190,ENSP00000415430,ENSP00000439056	BIRC5,GTSE1,HAUS5,KEAP1,KIF4A,LMNA,MAP2K2,MYO1C,PAFAH1B1,RACGAP1,SPRY2,TUBA1B,TUBA1C
GO:0005881	cytoplasmic microtubule	4	50	0.0046	ENSP00000301633,ENSP00000336799,ENSP00000380378,ENSP00000415430	BIRC5,GTSE1,PAFAH1B1,TUBA1B
GO:0005657	replication fork	4	53	0.0055	ENSP00000332706,ENSP00000376272,ENSP00000405726,ENSP00000434024	CDC45,H2AFX,PURA,RFC4
GO:1990904	ribonucleoprotein complex	14	770	0.0055	ENSP00000220429,ENSP00000265753,ENSP00000290158,ENSP00000296102,ENSP00000301740,ENSP00000312981,ENSP00000339090,ENSP00000348849,ENSP00000349960,ENSP00000355315,ENSP00000400467,ENSP00000410758,ENSP00000418960,ENSP00000449328	ACTB,BRCA1,EIF4H,GABPB1,KPNB1,LSM5,MRPL33,RBMX2,RPL39,RPL9,RPLP0,RPS26,SRRM2,USP39
GO:0099512	supramolecular fiber	15	873	0.0060	ENSP00000171111,ENSP00000262948,ENSP00000301072,ENSP00000301633,ENSP00000336799,ENSP00000352834,ENSP00000357283,ENSP00000357633,ENSP00000363524,ENSP00000366306,ENSP00000380378,ENSP00000389168,ENSP00000404190,ENSP00000415430,ENSP00000439056	BIRC5,GLRX3,GTSE1,HAUS5,KEAP1,KIF4A,LMNA,MAP2K2,MYO1C,PAFAH1B1,PPP1R12A,RACGAP1,SPRY2,TUBA1B,TUBA1C
GO:0005635	nuclear envelope	10	446	0.0072	ENSP00000285968,ENSP00000290158,ENSP00000293288,ENSP00000300128,ENSP00000352834,ENSP00000354742,ENSP00000355922,ENSP00000357283,ENSP00000380378,ENSP00000401564	BAX,CENPF,IPO9,KPNB1,LMNA,MYO1C,NUP205,PAFAH1B1,RANBP1,TMEM194A
GO:0001740	Barr body	2	5	0.0083	ENSP00000254810,ENSP00000355778	H3F3A,H3F3B
GO:0000803	sex chromosome	3	29	0.0108	ENSP00000254810,ENSP00000355778,ENSP00000434024	H2AFX,H3F3A,H3F3B
GO:0000775	chromosome, centromeric region	6	189	0.0153	ENSP00000256442,ENSP00000301633,ENSP00000342434,ENSP00000355922,ENSP00000380378,ENSP00000389168	BAZ1B,BIRC5,CCNB1,CENPF,PAFAH1B1,PPP1R12A
GO:0000776	kinetochore	5	130	0.0165	ENSP00000256442,ENSP00000301633,ENSP00000355922,ENSP00000380378,ENSP00000389168	BIRC5,CCNB1,CENPF,PAFAH1B1,PPP1R12A
GO:0005875	microtubule associated complex	5	144	0.0244	ENSP00000301633,ENSP00000358921,ENSP00000363524,ENSP00000380378,ENSP00000439056	ACTR1A,BIRC5,HAUS5,KIF4A,PAFAH1B1
GO:0000940	condensed chromosome outer kinetochore	2	11	0.0266	ENSP00000256442,ENSP00000355922	CCNB1,CENPF
GO:0000794	condensed nuclear chromosome	4	96	0.0337	ENSP00000256442,ENSP00000348020,ENSP00000418960,ENSP00000434024	BRCA1,CCNB1,H2AFX,MLH3
GO:0005876	spindle microtubule	3	47	0.0341	ENSP00000301633,ENSP00000363524,ENSP00000380378	BIRC5,KIF4A,PAFAH1B1
GO:0048471	perinuclear region of cytoplasm	11	670	0.0362	ENSP00000256682,ENSP00000262948,ENSP00000265753,ENSP00000296503,ENSP00000300035,ENSP00000338814,ENSP00000345728,ENSP00000355922,ENSP00000357283,ENSP00000380378,ENSP00000480763	ARF3,ATP7A,BAG5,CENPF,EIF4H,EPHA5,HMGB2,KIAA0101,LMNA,MAP2K2,PAFAH1B1
GO:0030496	midbody	5	165	0.0390	ENSP00000171111,ENSP00000301633,ENSP00000355922,ENSP00000363524,ENSP00000404190	BIRC5,CENPF,KEAP1,KIF4A,RACGAP1
GO:0000784	nuclear chromosome, telomeric region	3	51	0.0402	ENSP00000254810,ENSP00000332706,ENSP00000355778	H3F3A,H3F3B,PURA
GO:0001673	male germ cell nucleus	2	15	0.0410	ENSP00000348020,ENSP00000434024	H2AFX,MLH3
Molecular function
#term ID	term description	observed gene count	background gene count	false discovery rate	matching proteins in your network (IDs)	matching proteins in your network (labels)
GO:0017076	purine nucleotide binding	31	1865	0.00021	ENSP00000216122,ENSP00000217426,ENSP00000220003,ENSP00000256682,ENSP00000262027,ENSP00000262105,ENSP00000262300,ENSP00000262302,ENSP00000262375,ENSP00000262948,ENSP00000265056,ENSP00000269143,ENSP00000298048,ENSP00000301072,ENSP00000317272,ENSP00000336799,ENSP00000338814,ENSP00000342434,ENSP00000345728,ENSP00000348020,ENSP00000349960,ENSP00000352834,ENSP00000357643,ENSP00000358921,ENSP00000362271…	ACTB,ACTR1A,AFG3L2,AHCY,AK1,ARF3,ATP7A,BAG5,BAZ1B,CSK,DNAJA3,EPHA5,KIF4A,MAP2K2,MAPK8,MARS,MCM2,MCM4,MCM5,MELK,MET,MKI67,MLH3,MYO1C,NUBP2,PKMYT1,PRPS2,RFC4,SMARCA4,TUBA1B,TUBA1C
GO:0030554	adenyl nucleotide binding	28	1524	0.00021	ENSP00000216122,ENSP00000217426,ENSP00000220003,ENSP00000262027,ENSP00000262105,ENSP00000262300,ENSP00000262302,ENSP00000262375,ENSP00000262948,ENSP00000265056,ENSP00000269143,ENSP00000298048,ENSP00000317272,ENSP00000338814,ENSP00000342434,ENSP00000345728,ENSP00000348020,ENSP00000349960,ENSP00000352834,ENSP00000357643,ENSP00000358921,ENSP00000362271,ENSP00000363524,ENSP00000376272,ENSP00000378974…	ACTB,ACTR1A,AFG3L2,AHCY,AK1,ATP7A,BAG5,BAZ1B,CSK,DNAJA3,EPHA5,KIF4A,MAP2K2,MAPK8,MARS,MCM2,MCM4,MCM5,MELK,MET,MKI67,MLH3,MYO1C,NUBP2,PKMYT1,PRPS2,RFC4,SMARCA4
GO:0005524	ATP binding	26	1462	0.00036	ENSP00000216122,ENSP00000220003,ENSP00000262027,ENSP00000262105,ENSP00000262300,ENSP00000262302,ENSP00000262375,ENSP00000262948,ENSP00000265056,ENSP00000269143,ENSP00000298048,ENSP00000317272,ENSP00000342434,ENSP00000345728,ENSP00000348020,ENSP00000349960,ENSP00000352834,ENSP00000357643,ENSP00000358921,ENSP00000362271,ENSP00000363524,ENSP00000376272,ENSP00000378974,ENSP00000381504,ENSP00000395654…	ACTB,ACTR1A,AFG3L2,AK1,ATP7A,BAZ1B,CSK,DNAJA3,EPHA5,KIF4A,MAP2K2,MAPK8,MARS,MCM2,MCM4,MCM5,MELK,MET,MKI67,MLH3,MYO1C,NUBP2,PKMYT1,PRPS2,RFC4,SMARCA4
GO:0000166	nucleotide binding	32	2097	0.00038	ENSP00000216122,ENSP00000217426,ENSP00000220003,ENSP00000256682,ENSP00000262027,ENSP00000262105,ENSP00000262300,ENSP00000262302,ENSP00000262375,ENSP00000262948,ENSP00000265056,ENSP00000269143,ENSP00000298048,ENSP00000301072,ENSP00000317272,ENSP00000336799,ENSP00000338814,ENSP00000342434,ENSP00000345728,ENSP00000348020,ENSP00000349960,ENSP00000352834,ENSP00000357643,ENSP00000358921,ENSP00000362271…	ACTB,ACTR1A,AFG3L2,AHCY,AK1,ARF3,ATP7A,BAG5,BAZ1B,CSK,DNAJA3,EPHA5,KIF4A,MAP2K2,MAPK8,MARS,MCM2,MCM4,MCM5,MECP2,MELK,MET,MKI67,MLH3,MYO1C,NUBP2,PKMYT1,PRPS2,RFC4,SMARCA4,TUBA1B,TUBA1C
GO:0008144	drug binding	28	1710	0.00038	ENSP00000216122,ENSP00000220003,ENSP00000262027,ENSP00000262105,ENSP00000262300,ENSP00000262302,ENSP00000262375,ENSP00000262948,ENSP00000265056,ENSP00000269143,ENSP00000296503,ENSP00000298048,ENSP00000317272,ENSP00000342434,ENSP00000345728,ENSP00000348020,ENSP00000349960,ENSP00000352834,ENSP00000357643,ENSP00000358921,ENSP00000360608,ENSP00000362271,ENSP00000363524,ENSP00000376272,ENSP00000378974…	ACTB,ACTR1A,AFG3L2,AK1,ATP7A,BAZ1B,CSK,DNAJA3,EPHA5,GRIN1,HMGB2,KIF4A,MAP2K2,MAPK8,MARS,MCM2,MCM4,MCM5,MELK,MET,MKI67,MLH3,MYO1C,NUBP2,PKMYT1,PRPS2,RFC4,SMARCA4
GO:0032555	purine ribonucleotide binding	29	1853	0.00038	ENSP00000216122,ENSP00000220003,ENSP00000256682,ENSP00000262027,ENSP00000262105,ENSP00000262300,ENSP00000262302,ENSP00000262375,ENSP00000262948,ENSP00000265056,ENSP00000269143,ENSP00000298048,ENSP00000301072,ENSP00000317272,ENSP00000336799,ENSP00000342434,ENSP00000345728,ENSP00000348020,ENSP00000349960,ENSP00000352834,ENSP00000357643,ENSP00000358921,ENSP00000362271,ENSP00000363524,ENSP00000376272…	ACTB,ACTR1A,AFG3L2,AK1,ARF3,ATP7A,BAZ1B,CSK,DNAJA3,EPHA5,KIF4A,MAP2K2,MAPK8,MARS,MCM2,MCM4,MCM5,MELK,MET,MKI67,MLH3,MYO1C,NUBP2,PKMYT1,PRPS2,RFC4,SMARCA4,TUBA1B,TUBA1C
GO:0035639	purine ribonucleoside triphosphate binding	29	1794	0.00038	ENSP00000216122,ENSP00000220003,ENSP00000256682,ENSP00000262027,ENSP00000262105,ENSP00000262300,ENSP00000262302,ENSP00000262375,ENSP00000262948,ENSP00000265056,ENSP00000269143,ENSP00000298048,ENSP00000301072,ENSP00000317272,ENSP00000336799,ENSP00000342434,ENSP00000345728,ENSP00000348020,ENSP00000349960,ENSP00000352834,ENSP00000357643,ENSP00000358921,ENSP00000362271,ENSP00000363524,ENSP00000376272…	ACTB,ACTR1A,AFG3L2,AK1,ARF3,ATP7A,BAZ1B,CSK,DNAJA3,EPHA5,KIF4A,MAP2K2,MAPK8,MARS,MCM2,MCM4,MCM5,MELK,MET,MKI67,MLH3,MYO1C,NUBP2,PKMYT1,PRPS2,RFC4,SMARCA4,TUBA1B,TUBA1C
GO:0036094	small molecule binding	34	2460	0.00049	ENSP00000216122,ENSP00000217426,ENSP00000220003,ENSP00000256682,ENSP00000262027,ENSP00000262105,ENSP00000262300,ENSP00000262302,ENSP00000262375,ENSP00000262948,ENSP00000265056,ENSP00000269143,ENSP00000298048,ENSP00000301072,ENSP00000317272,ENSP00000336799,ENSP00000338814,ENSP00000342434,ENSP00000345728,ENSP00000348020,ENSP00000349960,ENSP00000352834,ENSP00000357643,ENSP00000358921,ENSP00000360608…	ACTB,ACTR1A,AFG3L2,AHCY,AK1,ARF3,ATP7A,BAG5,BAZ1B,CSK,DNAJA3,EPHA5,GRIN1,HMMR,KIF4A,MAP2K2,MAPK8,MARS,MCM2,MCM4,MCM5,MECP2,MELK,MET,MKI67,MLH3,MYO1C,NUBP2,PKMYT1,PRPS2,RFC4,SMARCA4,TUBA1B,TUBA1C
GO:1901363	heterocyclic compound binding	57	5305	0.00049	ENSP00000216122,ENSP00000217426,ENSP00000220003,ENSP00000220429,ENSP00000254810,ENSP00000256682,ENSP00000262027,ENSP00000262105,ENSP00000262300,ENSP00000262302,ENSP00000262375,ENSP00000262948,ENSP00000265056,ENSP00000265753,ENSP00000269143,ENSP00000282388,ENSP00000296503,ENSP00000298048,ENSP00000301072,ENSP00000305480,ENSP00000314129,ENSP00000317272,ENSP00000331901,ENSP00000332706,ENSP00000336799…	ACTB,ACTR1A,AFG3L2,AHCY,AK1,ARF3,ATP7A,BAG5,BAZ1B,BRCA1,CDC45,CSK,DNAJA3,EEF1G,EIF4H,EPHA5,FEN1,FOXM1,GABPB1,GABPB2,H2AFX,H3F3A,H3F3B,HMGB2,HOXC4,KIF4A,LSM5,MAP2K2,MAPK8,MARS,MCM2,MCM4,MCM5,MECP2,MELK,MET,MKI67,MLH3,MYO1C,NRF1,NUBP2,PKMYT1,PRPS2,PURA,RFC4,RPL39,RPL9,RPS26,SMARCA4,SPIB,TAF15,TFE3,THUMPD2,TUBA1B,TUBA1C,WHSC1,ZFP36L2
GO:0097159	organic cyclic compound binding	57	5382	0.00061	ENSP00000216122,ENSP00000217426,ENSP00000220003,ENSP00000220429,ENSP00000254810,ENSP00000256682,ENSP00000262027,ENSP00000262105,ENSP00000262300,ENSP00000262302,ENSP00000262375,ENSP00000262948,ENSP00000265056,ENSP00000265753,ENSP00000269143,ENSP00000282388,ENSP00000296503,ENSP00000298048,ENSP00000301072,ENSP00000305480,ENSP00000314129,ENSP00000317272,ENSP00000331901,ENSP00000332706,ENSP00000336799…	ACTB,ACTR1A,AFG3L2,AHCY,AK1,ARF3,ATP7A,BAG5,BAZ1B,BRCA1,CDC45,CSK,DNAJA3,EEF1G,EIF4H,EPHA5,FEN1,FOXM1,GABPB1,GABPB2,H2AFX,H3F3A,H3F3B,HMGB2,HOXC4,KIF4A,LSM5,MAP2K2,MAPK8,MARS,MCM2,MCM4,MCM5,MECP2,MELK,MET,MKI67,MLH3,MYO1C,NRF1,NUBP2,PKMYT1,PRPS2,PURA,RFC4,RPL39,RPL9,RPS26,SMARCA4,SPIB,TAF15,TFE3,THUMPD2,TUBA1B,TUBA1C,WHSC1,ZFP36L2
GO:0097367	carbohydrate derivative binding	31	2163	0.00061	ENSP00000216122,ENSP00000220003,ENSP00000256682,ENSP00000262027,ENSP00000262105,ENSP00000262300,ENSP00000262302,ENSP00000262375,ENSP00000262948,ENSP00000265056,ENSP00000269143,ENSP00000298048,ENSP00000301072,ENSP00000317272,ENSP00000336799,ENSP00000342434,ENSP00000345728,ENSP00000348020,ENSP00000349960,ENSP00000352834,ENSP00000357643,ENSP00000358921,ENSP00000362271,ENSP00000363524,ENSP00000376272…	ACTB,ACTR1A,AFG3L2,AK1,ARF3,ATP7A,BAZ1B,CSK,DNAJA3,EPHA5,HMMR,KIF4A,MAP2K2,MAPK8,MARS,MCM2,MCM4,MCM5,MELK,MET,MKI67,MLH3,MYO1C,NUBP2,PAFAH1B1,PKMYT1,PRPS2,RFC4,SMARCA4,TUBA1B,TUBA1C
GO:0019899	enzyme binding	31	2197	0.00071	ENSP00000220003,ENSP00000256442,ENSP00000262375,ENSP00000265056,ENSP00000290158,ENSP00000301633,ENSP00000317272,ENSP00000336799,ENSP00000338814,ENSP00000342307,ENSP00000343535,ENSP00000345728,ENSP00000349960,ENSP00000352834,ENSP00000354742,ENSP00000357633,ENSP00000360608,ENSP00000366306,ENSP00000370010,ENSP00000370196,ENSP00000376272,ENSP00000378974,ENSP00000380378,ENSP00000389168,ENSP00000395654…	ACTB,ATP7A,BAG5,BIRC5,BORA,BRCA1,CCNB1,CSK,DCUN1D2,DNAJA3,FOXM1,GLRX3,GRIN1,H2AFX,IPO9,KPNB1,MAPK8,MCM2,MET,MYO1C,PAFAH1B1,PPP1R12A,RACGAP1,RANBP1,RFC4,SBF1,SMARCA4,SPRY2,TMSB4X,TUBA1B,USP7
GO:0005515	protein binding	64	6605	0.0020	ENSP00000171111,ENSP00000217426,ENSP00000220003,ENSP00000220429,ENSP00000240316,ENSP00000254810,ENSP00000256442,ENSP00000262375,ENSP00000262948,ENSP00000264595,ENSP00000265056,ENSP00000269143,ENSP00000290158,ENSP00000293288,ENSP00000296503,ENSP00000301633,ENSP00000301740,ENSP00000314129,ENSP00000317272,ENSP00000319635,ENSP00000320092,ENSP00000332706,ENSP00000336799,ENSP00000338814,ENSP00000342307…	ACTB,AFG3L2,AGA,AHCY,ATP7A,BAG5,BAX,BAZ1B,BIRC5,BORA,BRCA1,BRF1,CCNB1,CENPF,COIL,CSK,CTSE,CXCR2,DCUN1D2,DNAJA3,EPB41L4B,FOXM1,GABPB1,GABPB2,GCA,GLRX3,GRIN1,H2AFX,H3F3A,H3F3B,HMGB2,HOXC4,IPO9,KEAP1,KIF4A,KPNB1,LMNA,MAP2K2,MAPK8,MCM2,MECP2,MET,MKI67,MYO1C,NCAPG2,NRF1,PAFAH1B1,PHKA1,PPP1R12A,PRPS2,PTTG1,PURA,RACGAP1,RANBP1,RFC4,SBF1,SH3GL3,SMARCA4,SPRY2,SRRM2,TFE3,TMSB4X,TUBA1B,USP7
GO:0003690	double-stranded DNA binding	16	828	0.0029	ENSP00000216122,ENSP00000254810,ENSP00000265056,ENSP00000296503,ENSP00000305480,ENSP00000314129,ENSP00000332706,ENSP00000342307,ENSP00000348020,ENSP00000355778,ENSP00000376924,ENSP00000395535,ENSP00000395654,ENSP00000399808,ENSP00000405726,ENSP00000471921	CDC45,FEN1,FOXM1,H3F3A,H3F3B,HMGB2,HOXC4,MCM2,MCM5,MECP2,MLH3,NRF1,PURA,SMARCA4,SPIB,TFE3
GO:0008536	Ran GTPase binding	4	35	0.0031	ENSP00000290158,ENSP00000301633,ENSP00000354742,ENSP00000401564	BIRC5,IPO9,KPNB1,RANBP1
GO:0001046	core promoter sequence-specific DNA binding	4	37	0.0036	ENSP00000254810,ENSP00000355778,ENSP00000376924,ENSP00000395654	H3F3A,H3F3B,NRF1,SMARCA4
GO:0003688	DNA replication origin binding	3	14	0.0041	ENSP00000216122,ENSP00000265056,ENSP00000405726	CDC45,MCM2,MCM5
GO:0005488	binding	96	11878	0.0042	ENSP00000171111,ENSP00000216122,ENSP00000217426,ENSP00000220003,ENSP00000220429,ENSP00000240316,ENSP00000254654,ENSP00000254810,ENSP00000256442,ENSP00000256682,ENSP00000262027,ENSP00000262105,ENSP00000262300,ENSP00000262302,ENSP00000262375,ENSP00000262948,ENSP00000264595,ENSP00000265056,ENSP00000265753,ENSP00000269143,ENSP00000282388,ENSP00000290158,ENSP00000293288,ENSP00000296503,ENSP00000298048…	ACTB,ACTR1A,AFG3L2,AGA,AHCY,AK1,ARF3,ATP7A,B4GALT2,BAG5,BAX,BAZ1B,BIRC5,BORA,BRCA1,BRF1,CCNB1,CDC45,CENPF,COIL,CSK,CTSE,CXCR2,DCUN1D2,DNAJA3,EEF1G,EIF4H,EPB41L4B,EPHA5,FEN1,FOXM1,GABPB1,GABPB2,GCA,GLRX3,GRIN1,H2AFX,H3F3A,H3F3B,HMGB2,HMMR,HOXC4,ILKAP,IPO9,KEAP1,KIAA0101,KIF4A,KPNB1,LMNA,LSM5,MAP2K2,MAPK8,MARS,MCM2,MCM4,MCM5,MECP2,MELK,MET,MKI67,MLH3,MYO1C,NCAPG2,NRF1,NUBP2,PAFAH1B1,PDE4C,PHKA1,PKM…
GO:0043168	anion binding	33	2696	0.0042	ENSP00000216122,ENSP00000220003,ENSP00000256682,ENSP00000262027,ENSP00000262105,ENSP00000262300,ENSP00000262302,ENSP00000262375,ENSP00000262948,ENSP00000265056,ENSP00000269143,ENSP00000298048,ENSP00000301072,ENSP00000317272,ENSP00000336799,ENSP00000342434,ENSP00000345728,ENSP00000348020,ENSP00000349960,ENSP00000352834,ENSP00000357643,ENSP00000358921,ENSP00000360608,ENSP00000362271,ENSP00000363524…	ACTB,ACTR1A,AFG3L2,AK1,ARF3,ATP7A,BAZ1B,CSK,DNAJA3,EPHA5,GRIN1,HMMR,KIF4A,MAP2K2,MAPK8,MARS,MCM2,MCM4,MCM5,MELK,MET,MKI67,MLH3,MYO1C,NUBP2,PAFAH1B1,PKMYT1,PRPS2,RACGAP1,RFC4,SMARCA4,TUBA1B,TUBA1C
GO:0003824	catalytic activity	55	5592	0.0051	ENSP00000017003,ENSP00000216122,ENSP00000217426,ENSP00000220003,ENSP00000225927,ENSP00000242257,ENSP00000254654,ENSP00000256442,ENSP00000256682,ENSP00000262027,ENSP00000262105,ENSP00000262300,ENSP00000262948,ENSP00000264595,ENSP00000265056,ENSP00000265753,ENSP00000269143,ENSP00000288207,ENSP00000298048,ENSP00000301072,ENSP00000301633,ENSP00000305480,ENSP00000310696,ENSP00000312981,ENSP00000317272…	ABHD6,AFG3L2,AGA,AHCY,AK1,ARF3,ATP7A,B4GALT2,BAZ1B,BIRC5,BRCA1,CCNB1,CCNB2,CDC45,CSK,CTSE,ECHS1,EEF1G,EIF4H,EPHA5,FEN1,FH,FTSJ2,GCA,GCNT2,GLRX3,ILKAP,KIF4A,MAP2K2,MAPK8,MARS,MCM2,MCM4,MCM5,MELK,MET,MLH3,MYO1C,NAGLU,PAFAH1B1,PDE4C,PDHA1,PHKA1,PKMYT1,PRPS2,RNF130,SBF1,SMARCA4,THUMPD2,TUBA1B,TUBA1C,USP39,USP7,WHSC1,XYLT2
GO:0001158	enhancer sequence-specific DNA binding	5	87	0.0063	ENSP00000254810,ENSP00000296503,ENSP00000355778,ENSP00000399808,ENSP00000471921	H3F3A,H3F3B,HMGB2,HOXC4,SPIB
GO:0008022	protein C-terminus binding	7	194	0.0063	ENSP00000220003,ENSP00000240316,ENSP00000320092,ENSP00000343535,ENSP00000352834,ENSP00000355922,ENSP00000357643	CENPF,COIL,CSK,MKI67,MYO1C,SH3GL3,USP7
GO:1990837	sequence-specific double-stranded DNA binding	14	747	0.0069	ENSP00000216122,ENSP00000254810,ENSP00000265056,ENSP00000296503,ENSP00000314129,ENSP00000332706,ENSP00000342307,ENSP00000348020,ENSP00000355778,ENSP00000376924,ENSP00000395654,ENSP00000399808,ENSP00000405726,ENSP00000471921	CDC45,FOXM1,H3F3A,H3F3B,HMGB2,HOXC4,MCM2,MCM5,MLH3,NRF1,PURA,SMARCA4,SPIB,TFE3
GO:0004386	helicase activity	6	147	0.0082	ENSP00000216122,ENSP00000262105,ENSP00000265056,ENSP00000265753,ENSP00000395654,ENSP00000405726	CDC45,EIF4H,MCM2,MCM4,MCM5,SMARCA4
GO:0003697	single-stranded DNA binding	5	99	0.0096	ENSP00000262105,ENSP00000296503,ENSP00000332706,ENSP00000348020,ENSP00000405726	CDC45,HMGB2,MCM4,MLH3,PURA
GO:0008134	transcription factor binding	12	610	0.0106	ENSP00000171111,ENSP00000262375,ENSP00000296503,ENSP00000332706,ENSP00000343535,ENSP00000349960,ENSP00000355922,ENSP00000387007,ENSP00000395535,ENSP00000395654,ENSP00000418960,ENSP00000448323	ACTB,BRCA1,BRF1,CENPF,DNAJA3,HMGB2,KEAP1,MECP2,NCAPG2,PURA,SMARCA4,USP7
GO:0003676	nucleic acid binding	36	3332	0.0146	ENSP00000216122,ENSP00000220429,ENSP00000254810,ENSP00000262027,ENSP00000262105,ENSP00000265056,ENSP00000265753,ENSP00000282388,ENSP00000296503,ENSP00000305480,ENSP00000314129,ENSP00000331901,ENSP00000332706,ENSP00000336799,ENSP00000342307,ENSP00000348020,ENSP00000348849,ENSP00000355315,ENSP00000355778,ENSP00000357643,ENSP00000357914,ENSP00000363524,ENSP00000372351,ENSP00000376272,ENSP00000376924…	BRCA1,CDC45,EEF1G,EIF4H,FEN1,FOXM1,GABPB1,GABPB2,H2AFX,H3F3A,H3F3B,HMGB2,HOXC4,KIF4A,LSM5,MARS,MCM2,MCM4,MCM5,MECP2,MKI67,MLH3,NRF1,PURA,RFC4,RPL39,RPL9,RPS26,SMARCA4,SPIB,TAF15,TFE3,THUMPD2,TUBA1B,WHSC1,ZFP36L2
GO:0003684	damaged DNA binding	4	64	0.0146	ENSP00000296503,ENSP00000305480,ENSP00000418960,ENSP00000434024	BRCA1,FEN1,H2AFX,HMGB2
GO:0000980	RNA polymerase II distal enhancer sequence-specific DNA binding	4	67	0.0166	ENSP00000254810,ENSP00000355778,ENSP00000399808,ENSP00000471921	H3F3A,H3F3B,HOXC4,SPIB
GO:0004713	protein tyrosine kinase activity	6	180	0.0179	ENSP00000220003,ENSP00000262948,ENSP00000298048,ENSP00000317272,ENSP00000342434,ENSP00000480763	BAZ1B,CSK,EPHA5,MAP2K2,MELK,MET
GO:0043565	sequence-specific DNA binding	16	1047	0.0179	ENSP00000216122,ENSP00000254810,ENSP00000265056,ENSP00000296503,ENSP00000314129,ENSP00000332706,ENSP00000342307,ENSP00000348020,ENSP00000355778,ENSP00000372351,ENSP00000376924,ENSP00000395535,ENSP00000395654,ENSP00000399808,ENSP00000405726,ENSP00000471921	CDC45,FOXM1,H3F3A,H3F3B,HMGB2,HOXC4,MCM2,MCM5,MECP2,MLH3,NRF1,PURA,SMARCA4,SPIB,TFE3,WHSC1
GO:0043539	protein serine/threonine kinase activator activity	3	32	0.0197	ENSP00000256442,ENSP00000262948,ENSP00000366306	CCNB1,MAP2K2,SPRY2
GO:0005198	structural molecule activity	12	679	0.0209	ENSP00000285968,ENSP00000296102,ENSP00000301072,ENSP00000336799,ENSP00000348849,ENSP00000349960,ENSP00000355315,ENSP00000357283,ENSP00000363694,ENSP00000400467,ENSP00000449328,ENSP00000485659	ACTB,EPB41L4B,LMNA,MRPL33,MUC5AC,NUP205,RPL39,RPL9,RPLP0,RPS26,TUBA1B,TUBA1C
GO:0042393	histone binding	6	188	0.0209	ENSP00000265056,ENSP00000342434,ENSP00000354742,ENSP00000387007,ENSP00000395654,ENSP00000434024	BAZ1B,H2AFX,IPO9,MCM2,NCAPG2,SMARCA4
GO:0017111	nucleoside-triphosphatase activity	13	778	0.0213	ENSP00000216122,ENSP00000256682,ENSP00000262105,ENSP00000265056,ENSP00000265753,ENSP00000301072,ENSP00000336799,ENSP00000345728,ENSP00000348020,ENSP00000352834,ENSP00000363524,ENSP00000395654,ENSP00000405726	ARF3,ATP7A,CDC45,EIF4H,KIF4A,MCM2,MCM4,MCM5,MLH3,MYO1C,SMARCA4,TUBA1B,TUBA1C
GO:0019901	protein kinase binding	11	599	0.0232	ENSP00000220003,ENSP00000256442,ENSP00000262375,ENSP00000338814,ENSP00000342307,ENSP00000349960,ENSP00000357633,ENSP00000366306,ENSP00000389168,ENSP00000404190,ENSP00000479266	ACTB,BAG5,BORA,CCNB1,CSK,DNAJA3,FOXM1,GLRX3,PPP1R12A,RACGAP1,SPRY2
GO:0030957	Tat protein binding	2	10	0.0310	ENSP00000349960,ENSP00000395654	ACTB,SMARCA4
GO:0003735	structural constituent of ribosome	5	146	0.0317	ENSP00000296102,ENSP00000348849,ENSP00000355315,ENSP00000400467,ENSP00000449328	MRPL33,RPL39,RPL9,RPLP0,RPS26
GO:0004672	protein kinase activity	11	635	0.0317	ENSP00000220003,ENSP00000256442,ENSP00000262300,ENSP00000262948,ENSP00000288207,ENSP00000298048,ENSP00000317272,ENSP00000342434,ENSP00000362643,ENSP00000378974,ENSP00000480763	BAZ1B,CCNB1,CCNB2,CSK,EPHA5,MAP2K2,MAPK8,MELK,MET,PHKA1,PKMYT1
GO:0016301	kinase activity	13	835	0.0317	ENSP00000220003,ENSP00000256442,ENSP00000262300,ENSP00000262948,ENSP00000288207,ENSP00000298048,ENSP00000317272,ENSP00000342434,ENSP00000362271,ENSP00000362643,ENSP00000378974,ENSP00000381504,ENSP00000480763	AK1,BAZ1B,CCNB1,CCNB2,CSK,EPHA5,MAP2K2,MAPK8,MELK,MET,PHKA1,PKMYT1,PRPS2
GO:0044212	transcription regulatory region DNA binding	13	829	0.0317	ENSP00000220429,ENSP00000254810,ENSP00000296503,ENSP00000314129,ENSP00000332706,ENSP00000342307,ENSP00000355778,ENSP00000357914,ENSP00000376924,ENSP00000395654,ENSP00000399808,ENSP00000418960,ENSP00000471921	BRCA1,FOXM1,GABPB1,GABPB2,H3F3A,H3F3B,HMGB2,HOXC4,NRF1,PURA,SMARCA4,SPIB,TFE3
GO:0003723	RNA binding	13	850	0.0354	ENSP00000262027,ENSP00000265753,ENSP00000282388,ENSP00000331901,ENSP00000336799,ENSP00000348849,ENSP00000355315,ENSP00000395535,ENSP00000395654,ENSP00000400467,ENSP00000410758,ENSP00000418960,ENSP00000423933	BRCA1,EEF1G,EIF4H,LSM5,MARS,MECP2,RPL39,RPL9,RPS26,SMARCA4,THUMPD2,TUBA1B,ZFP36L2
GO:0016787	hydrolase activity	27	2448	0.0354	ENSP00000216122,ENSP00000217426,ENSP00000225927,ENSP00000254654,ENSP00000256682,ENSP00000262105,ENSP00000264595,ENSP00000265056,ENSP00000265753,ENSP00000269143,ENSP00000301072,ENSP00000305480,ENSP00000312981,ENSP00000336799,ENSP00000343535,ENSP00000345728,ENSP00000347689,ENSP00000348020,ENSP00000350911,ENSP00000352834,ENSP00000363524,ENSP00000370196,ENSP00000380378,ENSP00000394842,ENSP00000395654…	ABHD6,AFG3L2,AGA,AHCY,ARF3,ATP7A,CDC45,CTSE,EIF4H,FEN1,GCA,ILKAP,KIF4A,MCM2,MCM4,MCM5,MLH3,MYO1C,NAGLU,PAFAH1B1,PDE4C,SBF1,SMARCA4,TUBA1B,TUBA1C,USP39,USP7
GO:0003677	DNA binding	27	2457	0.0359	ENSP00000216122,ENSP00000220429,ENSP00000254810,ENSP00000262105,ENSP00000265056,ENSP00000282388,ENSP00000296503,ENSP00000305480,ENSP00000314129,ENSP00000332706,ENSP00000342307,ENSP00000348020,ENSP00000355778,ENSP00000357643,ENSP00000357914,ENSP00000363524,ENSP00000372351,ENSP00000376272,ENSP00000376924,ENSP00000395535,ENSP00000395654,ENSP00000399808,ENSP00000405726,ENSP00000418960,ENSP00000434024…	BRCA1,CDC45,FEN1,FOXM1,GABPB1,GABPB2,H2AFX,H3F3A,H3F3B,HMGB2,HOXC4,KIF4A,MCM2,MCM4,MCM5,MECP2,MKI67,MLH3,NRF1,PURA,RFC4,SMARCA4,SPIB,TAF15,TFE3,WHSC1,ZFP36L2
GO:0051087	chaperone binding	4	100	0.0421	ENSP00000293288,ENSP00000301633,ENSP00000338814,ENSP00000345728	ATP7A,BAG5,BAX,BIRC5
GO:0004715	non-membrane spanning protein tyrosine kinase activity	3	51	0.0452	ENSP00000220003,ENSP00000298048,ENSP00000342434	BAZ1B,CSK,MELK
GO:0005200	structural constituent of cytoskeleton	4	106	0.0486	ENSP00000301072,ENSP00000336799,ENSP00000349960,ENSP00000363694	ACTB,EPB41L4B,TUBA1B,TUBA1C
IntePro protein domains and features
#term ID	term description	observed gene count	background gene count	false discovery rate	matching proteins in your network (IDs)	matching proteins in your network (labels)
IPR001208	MCM domain	3	9	0.0083	ENSP00000216122,ENSP00000262105,ENSP00000265056	MCM2,MCM4,MCM5
IPR018525	Mini-chromosome maintenance, conserved site	3	6	0.0083	ENSP00000216122,ENSP00000262105,ENSP00000265056	MCM2,MCM4,MCM5
IPR027925	MCM N-terminal domain	3	6	0.0083	ENSP00000216122,ENSP00000262105,ENSP00000265056	MCM2,MCM4,MCM5
IPR031327	Mini-chromosome maintenance protein	3	9	0.0083	ENSP00000216122,ENSP00000262105,ENSP00000265056	MCM2,MCM4,MCM5
IPR033762	MCM OB domain	3	8	0.0083	ENSP00000216122,ENSP00000262105,ENSP00000265056	MCM2,MCM4,MCM5
KEGG pathways
#term ID	term description	observed gene count	background gene count	false discovery rate	matching proteins in your network (IDs)	matching proteins in your network (labels)
hsa04110	Cell cycle	8	123	0.00038	ENSP00000216122,ENSP00000256442,ENSP00000262105,ENSP00000262300,ENSP00000265056,ENSP00000288207,ENSP00000377536,ENSP00000405726	CCNB1,CCNB2,CDC45,MCM2,MCM4,MCM5,PKMYT1,PTTG1
hsa03030	DNA replication	5	36	0.00059	ENSP00000216122,ENSP00000262105,ENSP00000265056,ENSP00000305480,ENSP00000376272	FEN1,MCM2,MCM4,MCM5,RFC4
hsa04210	Apoptosis	7	135	0.0023	ENSP00000262948,ENSP00000293288,ENSP00000301072,ENSP00000336799,ENSP00000349960,ENSP00000357283,ENSP00000378974	ACTB,BAX,LMNA,MAP2K2,MAPK8,TUBA1B,TUBA1C
hsa04115	p53 signaling pathway	4	68	0.0368	ENSP00000256442,ENSP00000288207,ENSP00000293288,ENSP00000415430	BAX,CCNB1,CCNB2,GTSE1
hsa05120	Epithelial cell signaling in Helicobacter pylori infection	4	66	0.0368	ENSP00000220003,ENSP00000317272,ENSP00000319635,ENSP00000378974	CSK,CXCR2,MAPK8,MET
hsa05202	Transcriptional misregulation in cancer	6	169	0.0368	ENSP00000293288,ENSP00000314129,ENSP00000317272,ENSP00000355778,ENSP00000372351,ENSP00000474096	BAX,H3F3A,MET,TAF15,TFE3,WHSC1
hsa05211	Renal cell carcinoma	4	68	0.0368	ENSP00000262948,ENSP00000314129,ENSP00000317272,ENSP00000355518	FH,MAP2K2,MET,TFE3
hsa05225	Hepatocellular carcinoma	6	163	0.0368	ENSP00000171111,ENSP00000262948,ENSP00000293288,ENSP00000317272,ENSP00000349960,ENSP00000395654	ACTB,BAX,KEAP1,MAP2K2,MET,SMARCA4
hsa03010	Ribosome	5	130	0.0376	ENSP00000296102,ENSP00000348849,ENSP00000355315,ENSP00000400467,ENSP00000449328	MRPL33,RPL39,RPL9,RPLP0,RPS26
hsa04068	FoxO signaling pathway	5	130	0.0376	ENSP00000256442,ENSP00000262948,ENSP00000288207,ENSP00000343535,ENSP00000378974	CCNB1,CCNB2,MAP2K2,MAPK8,USP7
Reactome pathways
#term ID	term description	observed gene count	background gene count	false discovery rate	matching proteins in your network (IDs)	matching proteins in your network (labels)
HSA-1640170	Cell Cycle	28	586	1.03e-13	ENSP00000216122,ENSP00000256442,ENSP00000262105,ENSP00000262300,ENSP00000265056,ENSP00000285968,ENSP00000288207,ENSP00000301072,ENSP00000305480,ENSP00000336799,ENSP00000342307,ENSP00000348020,ENSP00000355778,ENSP00000355922,ENSP00000358921,ENSP00000372351,ENSP00000376272,ENSP00000377492,ENSP00000377536,ENSP00000380378,ENSP00000387007,ENSP00000389168,ENSP00000405726,ENSP00000415430,ENSP00000418960…	ACTR1A,BORA,BRCA1,CCNB1,CCNB2,CDC45,CENPF,FEN1,FOXM1,GTSE1,H2AFX,H3F3A,HAUS5,HMMR,MCM2,MCM4,MCM5,MLH3,NCAPG2,NUP205,PAFAH1B1,PKMYT1,PPP1R12A,PTTG1,RFC4,TUBA1B,TUBA1C,WHSC1
HSA-69278	Cell Cycle, Mitotic	25	483	4.68e-13	ENSP00000216122,ENSP00000256442,ENSP00000262105,ENSP00000262300,ENSP00000265056,ENSP00000285968,ENSP00000288207,ENSP00000301072,ENSP00000305480,ENSP00000336799,ENSP00000342307,ENSP00000355778,ENSP00000355922,ENSP00000358921,ENSP00000376272,ENSP00000377492,ENSP00000377536,ENSP00000380378,ENSP00000387007,ENSP00000389168,ENSP00000405726,ENSP00000415430,ENSP00000434024,ENSP00000439056,ENSP00000479266	ACTR1A,BORA,CCNB1,CCNB2,CDC45,CENPF,FEN1,FOXM1,GTSE1,H2AFX,H3F3A,HAUS5,HMMR,MCM2,MCM4,MCM5,NCAPG2,NUP205,PAFAH1B1,PKMYT1,PPP1R12A,PTTG1,RFC4,TUBA1B,TUBA1C
HSA-69275	G2/M Transition	14	189	9.69e-09	ENSP00000256442,ENSP00000262300,ENSP00000288207,ENSP00000301072,ENSP00000336799,ENSP00000342307,ENSP00000355922,ENSP00000358921,ENSP00000377492,ENSP00000380378,ENSP00000389168,ENSP00000415430,ENSP00000439056,ENSP00000479266	ACTR1A,BORA,CCNB1,CCNB2,CENPF,FOXM1,GTSE1,HAUS5,HMMR,PAFAH1B1,PKMYT1,PPP1R12A,TUBA1B,TUBA1C
HSA-69481	G2/M Checkpoints	12	148	5.70e-08	ENSP00000216122,ENSP00000256442,ENSP00000262105,ENSP00000262300,ENSP00000265056,ENSP00000288207,ENSP00000372351,ENSP00000376272,ENSP00000405726,ENSP00000415430,ENSP00000418960,ENSP00000434024	BRCA1,CCNB1,CCNB2,CDC45,GTSE1,H2AFX,MCM2,MCM4,MCM5,PKMYT1,RFC4,WHSC1
HSA-69620	Cell Cycle Checkpoints	14	265	3.14e-07	ENSP00000216122,ENSP00000256442,ENSP00000262105,ENSP00000262300,ENSP00000265056,ENSP00000288207,ENSP00000355922,ENSP00000372351,ENSP00000376272,ENSP00000380378,ENSP00000405726,ENSP00000415430,ENSP00000418960,ENSP00000434024	BRCA1,CCNB1,CCNB2,CDC45,CENPF,GTSE1,H2AFX,MCM2,MCM4,MCM5,PAFAH1B1,PKMYT1,RFC4,WHSC1
HSA-69190	DNA strand elongation	6	31	1.02e-05	ENSP00000216122,ENSP00000262105,ENSP00000265056,ENSP00000305480,ENSP00000376272,ENSP00000405726	CDC45,FEN1,MCM2,MCM4,MCM5,RFC4
HSA-156711	Polo-like kinase mediated events	5	16	1.38e-05	ENSP00000256442,ENSP00000262300,ENSP00000288207,ENSP00000342307,ENSP00000355922	CCNB1,CCNB2,CENPF,FOXM1,PKMYT1
HSA-68886	M Phase	13	343	3.18e-05	ENSP00000256442,ENSP00000285968,ENSP00000288207,ENSP00000301072,ENSP00000336799,ENSP00000355778,ENSP00000355922,ENSP00000358921,ENSP00000377536,ENSP00000380378,ENSP00000387007,ENSP00000434024,ENSP00000439056	ACTR1A,CCNB1,CCNB2,CENPF,H2AFX,H3F3A,HAUS5,NCAPG2,NUP205,PAFAH1B1,PTTG1,TUBA1B,TUBA1C
HSA-73894	DNA Repair	12	290	3.32e-05	ENSP00000300035,ENSP00000305480,ENSP00000342434,ENSP00000343535,ENSP00000349960,ENSP00000372351,ENSP00000373952,ENSP00000376272,ENSP00000378974,ENSP00000384048,ENSP00000418960,ENSP00000434024	ACTB,BAZ1B,BRCA1,FANCA,FEN1,H2AFX,KIAA0101,MAPK8,PAXIP1,RFC4,USP7,WHSC1
HSA-176974	Unwinding of DNA	4	11	0.00011	ENSP00000216122,ENSP00000262105,ENSP00000265056,ENSP00000405726	CDC45,MCM2,MCM4,MCM5
HSA-2565942	Regulation of PLK1 Activity at G2/M Transition	7	85	0.00011	ENSP00000256442,ENSP00000288207,ENSP00000358921,ENSP00000380378,ENSP00000389168,ENSP00000439056,ENSP00000479266	ACTR1A,BORA,CCNB1,CCNB2,HAUS5,PAFAH1B1,PPP1R12A
HSA-5663205	Infectious disease	12	363	0.00024	ENSP00000262948,ENSP00000285968,ENSP00000290158,ENSP00000305480,ENSP00000317272,ENSP00000320092,ENSP00000348849,ENSP00000355315,ENSP00000400467,ENSP00000401564,ENSP00000449328,ENSP00000474096	FEN1,KPNB1,MAP2K2,MET,NUP205,RANBP1,RPL39,RPL9,RPLP0,RPS26,SH3GL3,TAF15
HSA-176187	Activation of ATR in response to replication stress	5	37	0.00030	ENSP00000216122,ENSP00000262105,ENSP00000265056,ENSP00000376272,ENSP00000405726	CDC45,MCM2,MCM4,MCM5,RFC4
HSA-5693532	DNA Double-Strand Break Repair	8	147	0.00030	ENSP00000305480,ENSP00000342434,ENSP00000372351,ENSP00000376272,ENSP00000378974,ENSP00000384048,ENSP00000418960,ENSP00000434024	BAZ1B,BRCA1,FEN1,H2AFX,MAPK8,PAXIP1,RFC4,WHSC1
HSA-69478	G2/M DNA replication checkpoint	3	5	0.00052	ENSP00000256442,ENSP00000262300,ENSP00000288207	CCNB1,CCNB2,PKMYT1
HSA-8856688	Golgi-to-ER retrograde transport	7	129	0.00096	ENSP00000256682,ENSP00000301072,ENSP00000336799,ENSP00000358921,ENSP00000363524,ENSP00000380378,ENSP00000404190	ACTR1A,ARF3,KIF4A,PAFAH1B1,RACGAP1,TUBA1B,TUBA1C
HSA-69273	Cyclin A/B1/B2 associated events during G2/M transition	4	25	0.0011	ENSP00000256442,ENSP00000262300,ENSP00000288207,ENSP00000342307	CCNB1,CCNB2,FOXM1,PKMYT1
HSA-68877	Mitotic Prometaphase	8	190	0.0013	ENSP00000256442,ENSP00000288207,ENSP00000301072,ENSP00000336799,ENSP00000355922,ENSP00000358921,ENSP00000380378,ENSP00000439056	ACTR1A,CCNB1,CCNB2,CENPF,HAUS5,PAFAH1B1,TUBA1B,TUBA1C
HSA-422475	Axon guidance	13	541	0.0017	ENSP00000262948,ENSP00000301072,ENSP00000317272,ENSP00000336799,ENSP00000348849,ENSP00000349960,ENSP00000355315,ENSP00000360608,ENSP00000363524,ENSP00000378974,ENSP00000400467,ENSP00000449328,ENSP00000480763	ACTB,EPHA5,GRIN1,KIF4A,MAP2K2,MAPK8,MET,RPL39,RPL9,RPLP0,RPS26,TUBA1B,TUBA1C
HSA-5693565	Recruitment and ATM-mediated phosphorylation of repair and signaling proteins at DNA double strand breaks	5	59	0.0017	ENSP00000342434,ENSP00000372351,ENSP00000378974,ENSP00000418960,ENSP00000434024	BAZ1B,BRCA1,H2AFX,MAPK8,WHSC1
HSA-68875	Mitotic Prophase	6	101	0.0017	ENSP00000256442,ENSP00000285968,ENSP00000288207,ENSP00000355778,ENSP00000387007,ENSP00000434024	CCNB1,CCNB2,H2AFX,H3F3A,NCAPG2,NUP205
HSA-68962	Activation of the pre-replicative complex	4	33	0.0022	ENSP00000216122,ENSP00000262105,ENSP00000265056,ENSP00000405726	CDC45,MCM2,MCM4,MCM5
HSA-1643685	Disease	18	1018	0.0025	ENSP00000217426,ENSP00000220003,ENSP00000225927,ENSP00000262948,ENSP00000285968,ENSP00000290158,ENSP00000305480,ENSP00000317272,ENSP00000320092,ENSP00000348849,ENSP00000349960,ENSP00000355315,ENSP00000357283,ENSP00000400467,ENSP00000401564,ENSP00000449328,ENSP00000474096,ENSP00000485659	ACTB,AHCY,CSK,FEN1,KPNB1,LMNA,MAP2K2,MET,MUC5AC,NAGLU,NUP205,RANBP1,RPL39,RPL9,RPLP0,RPS26,SH3GL3,TAF15
HSA-2408522	Selenoamino acid metabolism	6	112	0.0026	ENSP00000217426,ENSP00000262027,ENSP00000348849,ENSP00000355315,ENSP00000400467,ENSP00000449328	AHCY,MARS,RPL39,RPL9,RPLP0,RPS26
HSA-2132295	MHC class II antigen presentation	6	119	0.0031	ENSP00000301072,ENSP00000336799,ENSP00000350911,ENSP00000358921,ENSP00000363524,ENSP00000404190	ACTR1A,CTSE,KIF4A,RACGAP1,TUBA1B,TUBA1C
HSA-2500257	Resolution of Sister Chromatid Cohesion	6	118	0.0031	ENSP00000256442,ENSP00000288207,ENSP00000301072,ENSP00000336799,ENSP00000355922,ENSP00000380378	CCNB1,CCNB2,CENPF,PAFAH1B1,TUBA1B,TUBA1C
[truncated: 88 more rows]

## Sheet: GO_enrichment_281_neg
GO enrichment analysis of 281 genes negatively correlating with the SIL IC50 signature of five NSCLC cell lines
[truncated: 145 more rows]
