# Supplementary material for: Transcriptome profiling reveals Silibinin dose-dependent response network in non-small lung cancer cells
Source: PeerJ. 2020 Dec 16;8:e10373. doi: 10.7717/peerj.10373 (PMC7749657; doi:10.7717/peerj.10373)
Supplement: Supplemental Information 3 — Overlap between the set of 144 positively SIL-response correlating genes (from Supplementary Table S2) and 90 pan-cancer genes from Gladilin & Eils 2017 including three prominent targets of STAT3 transcription factor: BIRC5, FOXM1, BRCA1. [file peerj-08-10373-s003.xlsx]

## Sheet: Overlap_12_genes
#	Gene set A	Gene set B	Overlap of A and B		Gene set A: 90 "high network communicability" pan-cancer genes from Gladilin & Eils (2017) PLoS One
1	CDCA8	RPLP0	BIRC5		Gene set B: set of genes with high positive correlation between SIL IC50 and gene expression pattern in five NSCLC cell lines
2	CENPA	GHITM	BRCA1
3	KIF2C	TUBA1B	CCNB1		Hypergeometrical probability test of the overlap between gene sets A and B:
4	NUSAP1	ARF3	CENPF		hgt(22277,144,90,12)=5.7e-13
5	RAD54L	NAGLU	FANCA
6	KIF23	LSM5	FOXM1
7	CENPF	ACTB	GTSE1
8	UBE2C	MRPL33	MCM2
9	BUB1	MKI67	PTTG1
10	CENPH	BAX	RACGAP1
11	TACC3	NCAPG2	RFC4
12	CDC25C	AHCY	TACC3
13	KIF11	DNAJA3
14	POLA2	FANCA
15	MCM10	FOXM1
16	CDC45	C7orf26
17	MCM8	AGA
18	PRIM2	CCNB1
19	POLE2	CSK
20	BUB1B	MLH3
21	NCAPD2	MAP2K2
22	MAD2L1	PTTG1
23	CHEK2	KPNB1
24	NCAPH	TAF15
25	SMC4	CENPF
26	E2F7	PDE4C
27	SMC2	BCL7A
28	CDC20	GLRX3
29	ERCC6L	H3F3A
30	XRCC2	H3F3B
31	FBXO5	GRIN1
32	DLGAP5	MCM4
33	PRIM1	PKMYT1
34	KIF20A	MET
35	MCM2	RBMX2
36	MCM7	TUBA1B
37	AURKB	MCM4
38	RBL1	BIRC5
39	MCM6	MCM5
40	PTTG1	EEF1G
41	FOXM1	RPL39
42	POLD1	KIAA0101
43	PRC1	CDC45L
44	TIPIN	LSM5
45	NEK2	XYLT2
46	LIG1	DCUN1D2
47	CDK1	RANBP1
48	MCM3	TMSL3
49	CCNB1	TMSB4X
50	CLSPN	TFE3
51	ORC1	GCA
52	POLD2	NRF1
53	CDKN3	GCNT2
54	CDC6	AK1
55	BRCA1	PHKA1
56	BRCA2	SRRM2
57	CHEK1	EIF4H
58	NDC80	PDHA1
59	BORA	COIL
60	BIRC5	MARS
61	ATRIP	PRPS2
62	RRM2	GABPB1
63	TCF3	GABPB2
64	LIN9	TMEM194A
65	RFC4	RGS3
66	AURKA	IPO9
67	CDK2	MUC5AC
68	RACGAP1	ACTR1A
69	RFC2	IL8RB
70	CCNA2	HOXC4
71	FANCI	PPP1R12A
72	ANAPC7	ABHD6
73	FANCA	LOC643635
74	E2F5	USP39
75	FANCD2	PAXIP1
76	PLK1	DOPEY1
77	CKS1B	ATP7A
78	RFC5	EPB41L4B
79	PLK4	FTSJ2
80	CDT1	H3F3A
81	CDC25B	H3F3B
82	E2F1	RPL9
83	ECT2	MCM5
84	PSME4	EPHA5
85	CENPE	TACC3
86	CDCA5	KIF4A
87	GTSE1	ACTB
88	CEP78	ILKAP
89	TPX2	SPIB
90	CCNE2	MYO1C
91		BRCA1
92		NUP205
93		KEAP1
94		RFC4
95		SBF1
96		WHSC1
97		MCM2
98		ECHS1
99		PURA
100		CCNB2
101		ZFP36L2
102		BAG5
103		NUBP2
104		AFG3L2
105		SH3GL3
106		TROAP
107		B4GALT2
108		THUMPD2
109		H2AFX
110		MIRN21
111		TMEM49
112		BRF1
113		IGHA1
114		CTSE
115		HMGB2
116		TUBA1B
117		TUBA1B
118		FH
119		RACGAP1
120		LOC644191
121		LOC728937
122		RPS26
123		BAZ1B
124		USP7
125		TUBA1C
126		C13orf34
127		MAPK8
128		KPNB1
129		KIAA0841
130		FAM57A
131		PAFAH1B1
132		H2AFX
133		GTSE1
134		LOC728344
135		MECP2
136		FEN1
137		HMMR
138		RNF130
139		TMEM11
140		LMNA
141		SPRY2
142		C14orf108
143		SMARCA4
144		MELK

## Sheet: GO_enrichment_12
GO enrichment analysis of the overlap set of 12 genes: BIRC5, BRCA1, CCNB1, CENPF, FANCA, FOXM1, GTSE1, MCM2, PTTG1, RACGAP1, RFC4, TACC3
UniProt keywords
#term ID	term description	observed gene count	background gene count	false discovery rate	matching proteins in your network (IDs)	matching proteins in your network (labels)
KW-0131	Cell cycle	8	640	4.07e-08	ENSP00000256442,ENSP00000265056,ENSP00000326550,ENSP00000342307,ENSP00000355922,ENSP00000377536,ENSP00000404190,ENSP00000418960	BRCA1,CCNB1,CENPF,FOXM1,MCM2,PTTG1,RACGAP1,TACC3
KW-0132	Cell division	5	377	6.53e-05	ENSP00000256442,ENSP00000326550,ENSP00000355922,ENSP00000377536,ENSP00000404190	CCNB1,CENPF,PTTG1,RACGAP1,TACC3
KW-0498	Mitosis	4	268	0.00037	ENSP00000256442,ENSP00000326550,ENSP00000355922,ENSP00000377536	CCNB1,CENPF,PTTG1,TACC3
KW-0234	DNA repair	4	318	0.00054	ENSP00000342307,ENSP00000373952,ENSP00000377536,ENSP00000418960	BRCA1,FANCA,FOXM1,PTTG1
KW-0923	Fanconi anemia	2	20	0.00088	ENSP00000373952,ENSP00000418960	BRCA1,FANCA
KW-0007	Acetylation	8	3335	0.0018	ENSP00000256442,ENSP00000265056,ENSP00000326550,ENSP00000355922,ENSP00000376272,ENSP00000377536,ENSP00000404190,ENSP00000418960	BRCA1,CCNB1,CENPF,MCM2,PTTG1,RACGAP1,RFC4,TACC3
KW-0206	Cytoskeleton	5	1198	0.0040	ENSP00000256442,ENSP00000326550,ENSP00000355922,ENSP00000404190,ENSP00000415430	CCNB1,CENPF,GTSE1,RACGAP1,TACC3
KW-0539	Nucleus	9	5200	0.0048	ENSP00000256442,ENSP00000265056,ENSP00000342307,ENSP00000355922,ENSP00000373952,ENSP00000376272,ENSP00000377536,ENSP00000404190,ENSP00000418960	BRCA1,CCNB1,CENPF,FANCA,FOXM1,MCM2,PTTG1,RACGAP1,RFC4
KW-0235	DNA replication	2	97	0.0105	ENSP00000265056,ENSP00000376272	MCM2,RFC4
KW-0832	Ubl conjugation	6	2380	0.0105	ENSP00000256442,ENSP00000265056,ENSP00000342307,ENSP00000377536,ENSP00000404190,ENSP00000418960	BRCA1,CCNB1,FOXM1,MCM2,PTTG1,RACGAP1
KW-0963	Cytoplasm	8	4972	0.0174	ENSP00000256442,ENSP00000326550,ENSP00000355922,ENSP00000373952,ENSP00000377536,ENSP00000404190,ENSP00000415430,ENSP00000418960	BRCA1,CCNB1,CENPF,FANCA,GTSE1,PTTG1,RACGAP1,TACC3
KW-0597	Phosphoprotein	10	8066	0.0190	ENSP00000256442,ENSP00000265056,ENSP00000326550,ENSP00000342307,ENSP00000355922,ENSP00000373952,ENSP00000377536,ENSP00000404190,ENSP00000415430,ENSP00000418960	BRCA1,CCNB1,CENPF,FANCA,FOXM1,GTSE1,MCM2,PTTG1,RACGAP1,TACC3
Biological process
#term ID	term description	observed gene count	background gene count	false discovery rate	matching proteins in your network (IDs)	matching proteins in your network (labels)
GO:0022402	cell cycle process	12	890	7.55e-14	ENSP00000256442,ENSP00000265056,ENSP00000301633,ENSP00000326550,ENSP00000342307,ENSP00000355922,ENSP00000373952,ENSP00000376272,ENSP00000377536,ENSP00000404190,ENSP00000415430,ENSP00000418960	BIRC5,BRCA1,CCNB1,CENPF,FANCA,FOXM1,GTSE1,MCM2,PTTG1,RACGAP1,RFC4,TACC3
GO:1903047	mitotic cell cycle process	9	564	8.89e-10	ENSP00000256442,ENSP00000265056,ENSP00000301633,ENSP00000326550,ENSP00000342307,ENSP00000355922,ENSP00000404190,ENSP00000415430,ENSP00000418960	BIRC5,BRCA1,CCNB1,CENPF,FOXM1,GTSE1,MCM2,RACGAP1,TACC3
GO:0010564	regulation of cell cycle process	9	684	2.92e-09	ENSP00000256442,ENSP00000301633,ENSP00000326550,ENSP00000342307,ENSP00000355922,ENSP00000377536,ENSP00000404190,ENSP00000415430,ENSP00000418960	BIRC5,BRCA1,CCNB1,CENPF,FOXM1,GTSE1,PTTG1,RACGAP1,TACC3
GO:0051983	regulation of chromosome segregation	6	97	2.92e-09	ENSP00000256442,ENSP00000301633,ENSP00000326550,ENSP00000355922,ENSP00000377536,ENSP00000404190	BIRC5,CCNB1,CENPF,PTTG1,RACGAP1,TACC3
GO:0010965	regulation of mitotic sister chromatid separation	5	53	1.89e-08	ENSP00000256442,ENSP00000301633,ENSP00000326550,ENSP00000355922,ENSP00000377536	BIRC5,CCNB1,CENPF,PTTG1,TACC3
GO:0033044	regulation of chromosome organization	7	313	2.38e-08	ENSP00000256442,ENSP00000265056,ENSP00000301633,ENSP00000326550,ENSP00000355922,ENSP00000377536,ENSP00000418960	BIRC5,BRCA1,CCNB1,CENPF,MCM2,PTTG1,TACC3
GO:0045930	negative regulation of mitotic cell cycle	6	243	2.35e-07	ENSP00000256442,ENSP00000301633,ENSP00000355922,ENSP00000377536,ENSP00000415430,ENSP00000418960	BIRC5,BRCA1,CCNB1,CENPF,GTSE1,PTTG1
GO:0007059	chromosome segregation	6	253	2.76e-07	ENSP00000256442,ENSP00000301633,ENSP00000355922,ENSP00000377536,ENSP00000404190,ENSP00000418960	BIRC5,BRCA1,CCNB1,CENPF,PTTG1,RACGAP1
GO:0010948	negative regulation of cell cycle process	6	273	3.90e-07	ENSP00000256442,ENSP00000301633,ENSP00000355922,ENSP00000377536,ENSP00000415430,ENSP00000418960	BIRC5,BRCA1,CCNB1,CENPF,GTSE1,PTTG1
GO:2001251	negative regulation of chromosome organization	5	117	3.90e-07	ENSP00000265056,ENSP00000301633,ENSP00000355922,ENSP00000377536,ENSP00000418960	BIRC5,BRCA1,CENPF,MCM2,PTTG1
GO:0007346	regulation of mitotic cell cycle	7	608	1.05e-06	ENSP00000256442,ENSP00000301633,ENSP00000326550,ENSP00000355922,ENSP00000377536,ENSP00000415430,ENSP00000418960	BIRC5,BRCA1,CCNB1,CENPF,GTSE1,PTTG1,TACC3
GO:0007093	mitotic cell cycle checkpoint	5	153	1.20e-06	ENSP00000256442,ENSP00000301633,ENSP00000355922,ENSP00000415430,ENSP00000418960	BIRC5,BRCA1,CCNB1,CENPF,GTSE1
GO:1901991	negative regulation of mitotic cell cycle phase transition	5	160	1.41e-06	ENSP00000256442,ENSP00000301633,ENSP00000355922,ENSP00000415430,ENSP00000418960	BIRC5,BRCA1,CCNB1,CENPF,GTSE1
GO:0006974	cellular response to DNA damage stimulus	7	749	3.07e-06	ENSP00000256442,ENSP00000342307,ENSP00000373952,ENSP00000376272,ENSP00000377536,ENSP00000415430,ENSP00000418960	BRCA1,CCNB1,FANCA,FOXM1,GTSE1,PTTG1,RFC4
GO:0006259	DNA metabolic process	7	773	3.65e-06	ENSP00000265056,ENSP00000342307,ENSP00000355922,ENSP00000373952,ENSP00000376272,ENSP00000377536,ENSP00000418960	BRCA1,CENPF,FANCA,FOXM1,MCM2,PTTG1,RFC4
GO:0030330	DNA damage response, signal transduction by p53 class mediator	4	82	5.69e-06	ENSP00000256442,ENSP00000342307,ENSP00000415430,ENSP00000418960	BRCA1,CCNB1,FOXM1,GTSE1
GO:0051301	cell division	6	483	6.28e-06	ENSP00000256442,ENSP00000301633,ENSP00000326550,ENSP00000355922,ENSP00000377536,ENSP00000404190	BIRC5,CCNB1,CENPF,PTTG1,RACGAP1,TACC3
GO:0044772	mitotic cell cycle phase transition	5	254	8.96e-06	ENSP00000256442,ENSP00000265056,ENSP00000301633,ENSP00000326550,ENSP00000342307	BIRC5,CCNB1,FOXM1,MCM2,TACC3
GO:1902850	microtubule cytoskeleton organization involved in mitosis	4	94	8.96e-06	ENSP00000256442,ENSP00000301633,ENSP00000326550,ENSP00000404190	BIRC5,CCNB1,RACGAP1,TACC3
GO:0000280	nuclear division	5	268	1.03e-05	ENSP00000256442,ENSP00000301633,ENSP00000373952,ENSP00000377536,ENSP00000404190	BIRC5,CCNB1,FANCA,PTTG1,RACGAP1
GO:0090068	positive regulation of cell cycle process	5	273	1.09e-05	ENSP00000256442,ENSP00000301633,ENSP00000404190,ENSP00000415430,ENSP00000418960	BIRC5,BRCA1,CCNB1,GTSE1,RACGAP1
GO:2000816	negative regulation of mitotic sister chromatid separation	3	24	1.29e-05	ENSP00000301633,ENSP00000355922,ENSP00000377536	BIRC5,CENPF,PTTG1
GO:0006996	organelle organization	10	3131	1.32e-05	ENSP00000256442,ENSP00000265056,ENSP00000301633,ENSP00000326550,ENSP00000355922,ENSP00000373952,ENSP00000376272,ENSP00000377536,ENSP00000404190,ENSP00000418960	BIRC5,BRCA1,CCNB1,CENPF,FANCA,MCM2,PTTG1,RACGAP1,RFC4,TACC3
GO:0071156	regulation of cell cycle arrest	4	111	1.32e-05	ENSP00000256442,ENSP00000342307,ENSP00000415430,ENSP00000418960	BRCA1,CCNB1,FOXM1,GTSE1
GO:0007017	microtubule-based process	6	605	1.57e-05	ENSP00000256442,ENSP00000301633,ENSP00000326550,ENSP00000404190,ENSP00000415430,ENSP00000418960	BIRC5,BRCA1,CCNB1,GTSE1,RACGAP1,TACC3
GO:0000226	microtubule cytoskeleton organization	5	393	4.14e-05	ENSP00000256442,ENSP00000301633,ENSP00000326550,ENSP00000404190,ENSP00000418960	BIRC5,BRCA1,CCNB1,RACGAP1,TACC3
GO:1902749	regulation of cell cycle G2/M phase transition	4	167	4.48e-05	ENSP00000256442,ENSP00000355922,ENSP00000415430,ENSP00000418960	BRCA1,CCNB1,CENPF,GTSE1
GO:0030071	regulation of mitotic metaphase/anaphase transition	3	49	6.27e-05	ENSP00000256442,ENSP00000301633,ENSP00000355922	BIRC5,CCNB1,CENPF
GO:0098813	nuclear chromosome segregation	4	196	7.75e-05	ENSP00000256442,ENSP00000355922,ENSP00000377536,ENSP00000404190	CCNB1,CENPF,PTTG1,RACGAP1
GO:0006281	DNA repair	5	491	0.00011	ENSP00000342307,ENSP00000373952,ENSP00000376272,ENSP00000377536,ENSP00000418960	BRCA1,FANCA,FOXM1,PTTG1,RFC4
GO:0007052	mitotic spindle organization	3	70	0.00016	ENSP00000256442,ENSP00000301633,ENSP00000404190	BIRC5,CCNB1,RACGAP1
GO:0051128	regulation of cellular component organization	8	2306	0.00017	ENSP00000256442,ENSP00000265056,ENSP00000301633,ENSP00000326550,ENSP00000342307,ENSP00000355922,ENSP00000377536,ENSP00000418960	BIRC5,BRCA1,CCNB1,CENPF,FOXM1,MCM2,PTTG1,TACC3
GO:0051276	chromosome organization	6	999	0.00017	ENSP00000256442,ENSP00000265056,ENSP00000355922,ENSP00000376272,ENSP00000377536,ENSP00000404190	CCNB1,CENPF,MCM2,PTTG1,RACGAP1,RFC4
GO:0051303	establishment of chromosome localization	3	72	0.00017	ENSP00000256442,ENSP00000301633,ENSP00000355922	BIRC5,CCNB1,CENPF
GO:0072422	signal transduction involved in DNA damage checkpoint	3	73	0.00017	ENSP00000256442,ENSP00000415430,ENSP00000418960	BRCA1,CCNB1,GTSE1
GO:0071158	positive regulation of cell cycle arrest	3	85	0.00025	ENSP00000256442,ENSP00000415430,ENSP00000418960	BRCA1,CCNB1,GTSE1
GO:0051988	regulation of attachment of spindle microtubules to kinetochore	2	12	0.00040	ENSP00000256442,ENSP00000404190	CCNB1,RACGAP1
GO:0000086	G2/M transition of mitotic cell cycle	3	123	0.00069	ENSP00000256442,ENSP00000301633,ENSP00000342307	BIRC5,CCNB1,FOXM1
GO:0006978	DNA damage response, signal transduction by p53 class mediator resulting in transcription of p21 class mediator	2	17	0.00071	ENSP00000342307,ENSP00000418960	BRCA1,FOXM1
GO:0140014	mitotic nuclear division	3	136	0.00086	ENSP00000256442,ENSP00000301633,ENSP00000404190	BIRC5,CCNB1,RACGAP1
GO:0007094	mitotic spindle assembly checkpoint	2	21	0.00098	ENSP00000301633,ENSP00000355922	BIRC5,CENPF
GO:0010389	regulation of G2/M transition of mitotic cell cycle	3	149	0.0010	ENSP00000256442,ENSP00000355922,ENSP00000418960	BRCA1,CCNB1,CENPF
GO:0048232	male gamete generation	4	507	0.0019	ENSP00000256442,ENSP00000373952,ENSP00000377536,ENSP00000404190	CCNB1,FANCA,PTTG1,RACGAP1
GO:0031145	anaphase-promoting complex-dependent catabolic process	2	35	0.0022	ENSP00000256442,ENSP00000377536	CCNB1,PTTG1
GO:0032269	negative regulation of cellular protein metabolic process	5	1014	0.0022	ENSP00000256442,ENSP00000301633,ENSP00000342307,ENSP00000377536,ENSP00000418960	BIRC5,BRCA1,CCNB1,FOXM1,PTTG1
GO:0006260	DNA replication	3	203	0.0023	ENSP00000265056,ENSP00000376272,ENSP00000418960	BRCA1,MCM2,RFC4
GO:0051054	positive regulation of DNA metabolic process	3	209	0.0025	ENSP00000342307,ENSP00000376272,ENSP00000418960	BRCA1,FOXM1,RFC4
GO:0090307	mitotic spindle assembly	2	40	0.0028	ENSP00000301633,ENSP00000404190	BIRC5,RACGAP1
GO:0050896	response to stimulus	11	7824	0.0030	ENSP00000256442,ENSP00000265056,ENSP00000301633,ENSP00000342307,ENSP00000355922,ENSP00000373952,ENSP00000376272,ENSP00000377536,ENSP00000404190,ENSP00000415430,ENSP00000418960	BIRC5,BRCA1,CCNB1,CENPF,FANCA,FOXM1,GTSE1,MCM2,PTTG1,RACGAP1,RFC4
GO:0051716	cellular response to stimulus	10	6212	0.0032	ENSP00000256442,ENSP00000265056,ENSP00000301633,ENSP00000342307,ENSP00000373952,ENSP00000376272,ENSP00000377536,ENSP00000404190,ENSP00000415430,ENSP00000418960	BIRC5,BRCA1,CCNB1,FANCA,FOXM1,GTSE1,MCM2,PTTG1,RACGAP1,RFC4
GO:0000281	mitotic cytokinesis	2	50	0.0041	ENSP00000301633,ENSP00000404190	BIRC5,RACGAP1
GO:0006301	postreplication repair	2	51	0.0042	ENSP00000376272,ENSP00000418960	BRCA1,RFC4
GO:0051310	metaphase plate congression	2	51	0.0042	ENSP00000256442,ENSP00000355922	CCNB1,CENPF
GO:0045739	positive regulation of DNA repair	2	53	0.0044	ENSP00000342307,ENSP00000418960	BRCA1,FOXM1
GO:0050794	regulation of cellular process	12	10484	0.0049	ENSP00000256442,ENSP00000265056,ENSP00000301633,ENSP00000326550,ENSP00000342307,ENSP00000355922,ENSP00000373952,ENSP00000376272,ENSP00000377536,ENSP00000404190,ENSP00000415430,ENSP00000418960	BIRC5,BRCA1,CCNB1,CENPF,FANCA,FOXM1,GTSE1,MCM2,PTTG1,RACGAP1,RFC4,TACC3
GO:0006977	DNA damage response, signal transduction by p53 class mediator resulting in cell cycle arrest	2	59	0.0053	ENSP00000256442,ENSP00000415430	CCNB1,GTSE1
GO:0090304	nucleic acid metabolic process	8	3941	0.0053	ENSP00000265056,ENSP00000301633,ENSP00000342307,ENSP00000355922,ENSP00000373952,ENSP00000376272,ENSP00000377536,ENSP00000418960	BIRC5,BRCA1,CENPF,FANCA,FOXM1,MCM2,PTTG1,RFC4
GO:1901992	positive regulation of mitotic cell cycle phase transition	2	65	0.0059	ENSP00000256442,ENSP00000301633	BIRC5,CCNB1
GO:0019219	regulation of nucleobase-containing compound metabolic process	8	4133	0.0067	ENSP00000256442,ENSP00000301633,ENSP00000342307,ENSP00000355922,ENSP00000373952,ENSP00000376272,ENSP00000377536,ENSP00000418960	BIRC5,BRCA1,CCNB1,CENPF,FANCA,FOXM1,PTTG1,RFC4
GO:0050790	regulation of catalytic activity	6	2249	0.0083	ENSP00000256442,ENSP00000265056,ENSP00000301633,ENSP00000376272,ENSP00000377536,ENSP00000404190	BIRC5,CCNB1,MCM2,PTTG1,RACGAP1,RFC4
GO:0031058	positive regulation of histone modification	2	86	0.0091	ENSP00000256442,ENSP00000418960	BRCA1,CCNB1
GO:0051172	negative regulation of nitrogen compound metabolic process	6	2307	0.0092	ENSP00000256442,ENSP00000301633,ENSP00000342307,ENSP00000355922,ENSP00000377536,ENSP00000418960	BIRC5,BRCA1,CCNB1,CENPF,FOXM1,PTTG1
GO:0022607	cellular component assembly	6	2343	0.0099	ENSP00000256442,ENSP00000265056,ENSP00000301633,ENSP00000355922,ENSP00000373952,ENSP00000404190	BIRC5,CCNB1,CENPF,FANCA,MCM2,RACGAP1
GO:0035556	intracellular signal transduction	5	1528	0.0099	ENSP00000256442,ENSP00000342307,ENSP00000404190,ENSP00000415430,ENSP00000418960	BRCA1,CCNB1,FOXM1,GTSE1,RACGAP1
GO:0048523	negative regulation of cellular process	8	4454	0.0099	ENSP00000256442,ENSP00000265056,ENSP00000301633,ENSP00000342307,ENSP00000355922,ENSP00000377536,ENSP00000415430,ENSP00000418960	BIRC5,BRCA1,CCNB1,CENPF,FOXM1,GTSE1,MCM2,PTTG1
GO:0065009	regulation of molecular function	7	3322	0.0099	ENSP00000256442,ENSP00000265056,ENSP00000301633,ENSP00000373952,ENSP00000376272,ENSP00000377536,ENSP00000404190	BIRC5,CCNB1,FANCA,MCM2,PTTG1,RACGAP1,RFC4
GO:0071897	DNA biosynthetic process	2	95	0.0102	ENSP00000355922,ENSP00000376272	CENPF,RFC4
GO:0050793	regulation of developmental process	6	2416	0.0109	ENSP00000256442,ENSP00000342307,ENSP00000355922,ENSP00000373952,ENSP00000404190,ENSP00000418960	BRCA1,CCNB1,CENPF,FANCA,FOXM1,RACGAP1
GO:0000070	mitotic sister chromatid segregation	2	101	0.0111	ENSP00000256442,ENSP00000404190	CCNB1,RACGAP1
GO:0042127	regulation of cell population proliferation	5	1594	0.0111	ENSP00000256442,ENSP00000301633,ENSP00000342307,ENSP00000373952,ENSP00000418960	BIRC5,BRCA1,CCNB1,FANCA,FOXM1
GO:0031324	negative regulation of cellular metabolic process	6	2463	0.0114	ENSP00000256442,ENSP00000301633,ENSP00000342307,ENSP00000355922,ENSP00000377536,ENSP00000418960	BIRC5,BRCA1,CCNB1,CENPF,FOXM1,PTTG1
GO:0034645	cellular macromolecule biosynthetic process	7	3518	0.0124	ENSP00000265056,ENSP00000301633,ENSP00000342307,ENSP00000355922,ENSP00000376272,ENSP00000377536,ENSP00000418960	BIRC5,BRCA1,CENPF,FOXM1,MCM2,PTTG1,RFC4
GO:0010629	negative regulation of gene expression	5	1670	0.0128	ENSP00000256442,ENSP00000301633,ENSP00000342307,ENSP00000355922,ENSP00000418960	BIRC5,BRCA1,CCNB1,CENPF,FOXM1
GO:0051346	negative regulation of hydrolase activity	3	438	0.0128	ENSP00000265056,ENSP00000301633,ENSP00000377536	BIRC5,MCM2,PTTG1
GO:0006261	DNA-dependent DNA replication	2	114	0.0129	ENSP00000265056,ENSP00000376272	MCM2,RFC4
GO:0010605	negative regulation of macromolecule metabolic process	6	2558	0.0132	ENSP00000256442,ENSP00000301633,ENSP00000342307,ENSP00000355922,ENSP00000377536,ENSP00000418960	BIRC5,BRCA1,CCNB1,CENPF,FOXM1,PTTG1
GO:0016202	regulation of striated muscle tissue development	2	127	0.0153	ENSP00000256442,ENSP00000355922	CCNB1,CENPF
GO:0007283	spermatogenesis	3	490	0.0162	ENSP00000256442,ENSP00000377536,ENSP00000404190	CCNB1,PTTG1,RACGAP1
GO:0044260	cellular macromolecule metabolic process	9	6413	0.0182	ENSP00000256442,ENSP00000265056,ENSP00000301633,ENSP00000342307,ENSP00000355922,ENSP00000373952,ENSP00000376272,ENSP00000377536,ENSP00000418960	BIRC5,BRCA1,CCNB1,CENPF,FANCA,FOXM1,MCM2,PTTG1,RFC4
GO:0140013	meiotic nuclear division	2	146	0.0188	ENSP00000373952,ENSP00000377536	FANCA,PTTG1
GO:0048856	anatomical structure development	8	5085	0.0190	ENSP00000256442,ENSP00000265056,ENSP00000326550,ENSP00000342307,ENSP00000355922,ENSP00000373952,ENSP00000404190,ENSP00000418960	BRCA1,CCNB1,CENPF,FANCA,FOXM1,MCM2,RACGAP1,TACC3
GO:2000026	regulation of multicellular organismal development	5	1876	0.0190	ENSP00000256442,ENSP00000355922,ENSP00000373952,ENSP00000404190,ENSP00000418960	BRCA1,CCNB1,CENPF,FANCA,RACGAP1
GO:0032501	multicellular organismal process	9	6507	0.0195	ENSP00000256442,ENSP00000265056,ENSP00000301633,ENSP00000326550,ENSP00000355922,ENSP00000373952,ENSP00000377536,ENSP00000404190,ENSP00000418960	BIRC5,BRCA1,CCNB1,CENPF,FANCA,MCM2,PTTG1,RACGAP1,TACC3
GO:0051252	regulation of RNA metabolic process	7	3890	0.0195	ENSP00000256442,ENSP00000301633,ENSP00000342307,ENSP00000355922,ENSP00000373952,ENSP00000377536,ENSP00000418960	BIRC5,BRCA1,CCNB1,CENPF,FANCA,FOXM1,PTTG1
GO:0010638	positive regulation of organelle organization	3	552	0.0208	ENSP00000256442,ENSP00000301633,ENSP00000418960	BIRC5,BRCA1,CCNB1
GO:0045892	negative regulation of transcription, DNA-templated	4	1169	0.0215	ENSP00000301633,ENSP00000342307,ENSP00000355922,ENSP00000418960	BIRC5,BRCA1,CENPF,FOXM1
GO:2000377	regulation of reactive oxygen species metabolic process	2	169	0.0230	ENSP00000342307,ENSP00000418960	BRCA1,FOXM1
GO:2000112	regulation of cellular macromolecule biosynthetic process	7	4050	0.0232	ENSP00000301633,ENSP00000342307,ENSP00000355922,ENSP00000373952,ENSP00000376272,ENSP00000377536,ENSP00000418960	BIRC5,BRCA1,CENPF,FANCA,FOXM1,PTTG1,RFC4
GO:0031400	negative regulation of protein modification process	3	592	0.0241	ENSP00000256442,ENSP00000342307,ENSP00000418960	BRCA1,CCNB1,FOXM1
GO:0070507	regulation of microtubule cytoskeleton organization	2	177	0.0244	ENSP00000326550,ENSP00000418960	BRCA1,TACC3
GO:0051336	regulation of hydrolase activity	4	1238	0.0249	ENSP00000265056,ENSP00000301633,ENSP00000377536,ENSP00000404190	BIRC5,MCM2,PTTG1,RACGAP1
GO:0034654	nucleobase-containing compound biosynthetic process	6	3031	0.0256	ENSP00000301633,ENSP00000342307,ENSP00000355922,ENSP00000376272,ENSP00000377536,ENSP00000418960	BIRC5,BRCA1,CENPF,FOXM1,PTTG1,RFC4
GO:0006323	DNA packaging	2	195	0.0282	ENSP00000256442,ENSP00000265056	CCNB1,MCM2
GO:0051253	negative regulation of RNA metabolic process	4	1303	0.0286	ENSP00000301633,ENSP00000342307,ENSP00000355922,ENSP00000418960	BIRC5,BRCA1,CENPF,FOXM1
GO:0070925	organelle assembly	3	666	0.0309	ENSP00000301633,ENSP00000355922,ENSP00000404190	BIRC5,CENPF,RACGAP1
GO:0008283	cell population proliferation	3	676	0.0317	ENSP00000326550,ENSP00000355922,ENSP00000404190	CENPF,RACGAP1,TACC3
GO:0065004	protein-DNA complex assembly	2	223	0.0344	ENSP00000265056,ENSP00000355922	CENPF,MCM2
GO:0010468	regulation of gene expression	7	4533	0.0389	ENSP00000256442,ENSP00000301633,ENSP00000342307,ENSP00000355922,ENSP00000373952,ENSP00000377536,ENSP00000418960	BIRC5,BRCA1,CCNB1,CENPF,FANCA,FOXM1,PTTG1
GO:0010951	negative regulation of endopeptidase activity	2	242	0.0393	ENSP00000301633,ENSP00000377536	BIRC5,PTTG1
GO:0065003	protein-containing complex assembly	4	1514	0.0430	ENSP00000256442,ENSP00000265056,ENSP00000355922,ENSP00000373952	CCNB1,CENPF,FANCA,MCM2
GO:0007275	multicellular organism development	7	4726	0.0463	ENSP00000256442,ENSP00000265056,ENSP00000326550,ENSP00000355922,ENSP00000373952,ENSP00000404190,ENSP00000418960	BRCA1,CCNB1,CENPF,FANCA,MCM2,RACGAP1,TACC3
GO:0060255	regulation of macromolecule metabolic process	8	6072	0.0463	ENSP00000256442,ENSP00000301633,ENSP00000342307,ENSP00000355922,ENSP00000373952,ENSP00000376272,ENSP00000377536,ENSP00000418960	BIRC5,BRCA1,CCNB1,CENPF,FANCA,FOXM1,PTTG1,RFC4
Cellular components
#term ID	term description	observed gene count	background gene count	false discovery rate	matching proteins in your network (IDs)	matching proteins in your network (labels)
GO:0015630	microtubule cytoskeleton	8	1118	6.30e-06	ENSP00000256442,ENSP00000265056,ENSP00000301633,ENSP00000326550,ENSP00000355922,ENSP00000404190,ENSP00000415430,ENSP00000418960	BIRC5,BRCA1,CCNB1,CENPF,GTSE1,MCM2,RACGAP1,TACC3
GO:0005654	nucleoplasm	10	3446	6.08e-05	ENSP00000256442,ENSP00000265056,ENSP00000301633,ENSP00000342307,ENSP00000355922,ENSP00000373952,ENSP00000376272,ENSP00000404190,ENSP00000415430,ENSP00000418960	BIRC5,BRCA1,CCNB1,CENPF,FANCA,FOXM1,GTSE1,MCM2,RACGAP1,RFC4
GO:0005819	spindle	5	322	6.08e-05	ENSP00000256442,ENSP00000301633,ENSP00000326550,ENSP00000355922,ENSP00000404190	BIRC5,CCNB1,CENPF,RACGAP1,TACC3
GO:0000793	condensed chromosome	4	215	0.00014	ENSP00000256442,ENSP00000301633,ENSP00000355922,ENSP00000418960	BIRC5,BRCA1,CCNB1,CENPF
GO:0044427	chromosomal part	6	819	0.00014	ENSP00000256442,ENSP00000265056,ENSP00000301633,ENSP00000355922,ENSP00000376272,ENSP00000418960	BIRC5,BRCA1,CCNB1,CENPF,MCM2,RFC4
GO:0044430	cytoskeletal part	7	1547	0.00016	ENSP00000256442,ENSP00000301633,ENSP00000326550,ENSP00000355922,ENSP00000404190,ENSP00000415430,ENSP00000418960	BIRC5,BRCA1,CCNB1,CENPF,GTSE1,RACGAP1,TACC3
GO:0000940	condensed chromosome outer kinetochore	2	11	0.00033	ENSP00000256442,ENSP00000355922	CCNB1,CENPF
GO:0000777	condensed chromosome kinetochore	3	104	0.00038	ENSP00000256442,ENSP00000301633,ENSP00000355922	BIRC5,CCNB1,CENPF
GO:0005815	microtubule organizing center	5	683	0.00038	ENSP00000256442,ENSP00000301633,ENSP00000326550,ENSP00000355922,ENSP00000418960	BIRC5,BRCA1,CCNB1,CENPF,TACC3
GO:0005634	nucleus	11	6892	0.00056	ENSP00000256442,ENSP00000265056,ENSP00000301633,ENSP00000342307,ENSP00000355922,ENSP00000373952,ENSP00000376272,ENSP00000377536,ENSP00000404190,ENSP00000415430,ENSP00000418960	BIRC5,BRCA1,CCNB1,CENPF,FANCA,FOXM1,GTSE1,MCM2,PTTG1,RACGAP1,RFC4
GO:0043232	intracellular non-membrane-bounded organelle	9	4005	0.00056	ENSP00000256442,ENSP00000265056,ENSP00000301633,ENSP00000326550,ENSP00000355922,ENSP00000376272,ENSP00000404190,ENSP00000415430,ENSP00000418960	BIRC5,BRCA1,CCNB1,CENPF,GTSE1,MCM2,RACGAP1,RFC4,TACC3
GO:0000922	spindle pole	3	150	0.00060	ENSP00000256442,ENSP00000326550,ENSP00000355922	CCNB1,CENPF,TACC3
GO:0030496	midbody	3	165	0.00075	ENSP00000301633,ENSP00000355922,ENSP00000404190	BIRC5,CENPF,RACGAP1
GO:0000228	nuclear chromosome	4	514	0.0011	ENSP00000256442,ENSP00000265056,ENSP00000301633,ENSP00000418960	BIRC5,BRCA1,CCNB1,MCM2
GO:0005881	cytoplasmic microtubule	2	50	0.0023	ENSP00000301633,ENSP00000415430	BIRC5,GTSE1
GO:0044446	intracellular organelle part	11	8882	0.0057	ENSP00000256442,ENSP00000265056,ENSP00000301633,ENSP00000326550,ENSP00000342307,ENSP00000355922,ENSP00000373952,ENSP00000376272,ENSP00000404190,ENSP00000415430,ENSP00000418960	BIRC5,BRCA1,CCNB1,CENPF,FANCA,FOXM1,GTSE1,MCM2,RACGAP1,RFC4,TACC3
GO:0072686	mitotic spindle	2	87	0.0060	ENSP00000326550,ENSP00000404190	RACGAP1,TACC3
GO:0005874	microtubule	3	385	0.0066	ENSP00000301633,ENSP00000404190,ENSP00000415430	BIRC5,GTSE1,RACGAP1
GO:0000794	condensed nuclear chromosome	2	96	0.0067	ENSP00000256442,ENSP00000418960	BRCA1,CCNB1
GO:0032991	protein-containing complex	8	4792	0.0098	ENSP00000256442,ENSP00000265056,ENSP00000301633,ENSP00000355922,ENSP00000373952,ENSP00000376272,ENSP00000404190,ENSP00000418960	BIRC5,BRCA1,CCNB1,CENPF,FANCA,MCM2,RACGAP1,RFC4
GO:0044454	nuclear chromosome part	3	480	0.0110	ENSP00000256442,ENSP00000265056,ENSP00000418960	BRCA1,CCNB1,MCM2
GO:0043229	intracellular organelle	12	12193	0.0132	ENSP00000256442,ENSP00000265056,ENSP00000301633,ENSP00000326550,ENSP00000342307,ENSP00000355922,ENSP00000373952,ENSP00000376272,ENSP00000377536,ENSP00000404190,ENSP00000415430,ENSP00000418960	BIRC5,BRCA1,CCNB1,CENPF,FANCA,FOXM1,GTSE1,MCM2,PTTG1,RACGAP1,RFC4,TACC3
GO:0044450	microtubule organizing center part	2	167	0.0167	ENSP00000301633,ENSP00000418960	BIRC5,BRCA1
GO:0005829	cytosol	7	4958	0.0474	ENSP00000256442,ENSP00000301633,ENSP00000326550,ENSP00000355922,ENSP00000377536,ENSP00000404190,ENSP00000415430	BIRC5,CCNB1,CENPF,GTSE1,PTTG1,RACGAP1,TACC3
Molecular function
#term ID	term description	observed gene count	background gene count	false discovery rate	matching proteins in your network (IDs)	matching proteins in your network (labels)
GO:0019899	enzyme binding	7	2197	0.0137	ENSP00000256442,ENSP00000265056,ENSP00000301633,ENSP00000342307,ENSP00000376272,ENSP00000404190,ENSP00000418960	BIRC5,BRCA1,CCNB1,FOXM1,MCM2,RACGAP1,RFC4
GO:0004869	cysteine-type endopeptidase inhibitor activity	2	57	0.0367	ENSP00000301633,ENSP00000377536	BIRC5,PTTG1
GO:0015631	tubulin binding	3	344	0.0456	ENSP00000301633,ENSP00000404190,ENSP00000418960	BIRC5,BRCA1,RACGAP1
Reactome pathways
#term ID	term description	observed gene count	background gene count	false discovery rate	matching proteins in your network (IDs)	matching proteins in your network (labels)
HSA-1640170	Cell Cycle	8	586	4.33e-08	ENSP00000256442,ENSP00000265056,ENSP00000342307,ENSP00000355922,ENSP00000376272,ENSP00000377536,ENSP00000415430,ENSP00000418960	BRCA1,CCNB1,CENPF,FOXM1,GTSE1,MCM2,PTTG1,RFC4
HSA-69278	Cell Cycle, Mitotic	7	483	2.97e-07	ENSP00000256442,ENSP00000265056,ENSP00000342307,ENSP00000355922,ENSP00000376272,ENSP00000377536,ENSP00000415430	CCNB1,CENPF,FOXM1,GTSE1,MCM2,PTTG1,RFC4
HSA-69620	Cell Cycle Checkpoints	6	265	2.97e-07	ENSP00000256442,ENSP00000265056,ENSP00000355922,ENSP00000376272,ENSP00000415430,ENSP00000418960	BRCA1,CCNB1,CENPF,GTSE1,MCM2,RFC4
HSA-69481	G2/M Checkpoints	5	148	7.34e-07	ENSP00000256442,ENSP00000265056,ENSP00000376272,ENSP00000415430,ENSP00000418960	BRCA1,CCNB1,GTSE1,MCM2,RFC4
HSA-156711	Polo-like kinase mediated events	3	16	4.81e-06	ENSP00000256442,ENSP00000342307,ENSP00000355922	CCNB1,CENPF,FOXM1
HSA-69275	G2/M Transition	4	189	0.00010	ENSP00000256442,ENSP00000342307,ENSP00000355922,ENSP00000415430	CCNB1,CENPF,FOXM1,GTSE1
HSA-69473	G2/M DNA damage checkpoint	3	78	0.00026	ENSP00000256442,ENSP00000376272,ENSP00000418960	BRCA1,CCNB1,RFC4
HSA-69273	Cyclin A/B1/B2 associated events during G2/M transition	2	25	0.0019	ENSP00000256442,ENSP00000342307	CCNB1,FOXM1
HSA-69190	DNA strand elongation	2	31	0.0026	ENSP00000265056,ENSP00000376272	MCM2,RFC4
HSA-176187	Activation of ATR in response to replication stress	2	37	0.0031	ENSP00000265056,ENSP00000376272	MCM2,RFC4
HSA-5685938	HDR through Single Strand Annealing (SSA)	2	36	0.0031	ENSP00000376272,ENSP00000418960	BRCA1,RFC4
HSA-5693616	Presynaptic phase of homologous DNA pairing and strand exchange	2	38	0.0031	ENSP00000376272,ENSP00000418960	BRCA1,RFC4
HSA-73894	DNA Repair	3	290	0.0063	ENSP00000373952,ENSP00000376272,ENSP00000418960	BRCA1,FANCA,RFC4
HSA-176409	APC/C:Cdc20 mediated degradation of mitotic proteins	2	71	0.0074	ENSP00000256442,ENSP00000377536	CCNB1,PTTG1
HSA-8852276	The role of GTSE1 in G2/M progression after G2 checkpoint	2	73	0.0074	ENSP00000256442,ENSP00000415430	CCNB1,GTSE1
HSA-68886	M Phase	3	343	0.0076	ENSP00000256442,ENSP00000355922,ENSP00000377536	CCNB1,CENPF,PTTG1
HSA-3700989	Transcriptional Regulation by TP53	3	359	0.0077	ENSP00000256442,ENSP00000376272,ENSP00000418960	BRCA1,CCNB1,RFC4
HSA-5693607	Processing of DNA double-strand break ends	2	81	0.0077	ENSP00000376272,ENSP00000418960	BRCA1,RFC4
HSA-6804756	Regulation of TP53 Activity through Phosphorylation	2	92	0.0083	ENSP00000376272,ENSP00000418960	BRCA1,RFC4
HSA-2500257	Resolution of Sister Chromatid Cohesion	2	118	0.0120	ENSP00000256442,ENSP00000355922	CCNB1,CENPF
HSA-69206	G1/S Transition	2	128	0.0127	ENSP00000256442,ENSP00000265056	CCNB1,MCM2
HSA-2467813	Separation of Sister Chromatids	2	178	0.0206	ENSP00000355922,ENSP00000377536	CENPF,PTTG1
KEGG pathways
#term ID	term description	observed gene count	background gene count	false discovery rate	matching proteins in your network (IDs)	matching proteins in your network (labels)
hsa04110	Cell cycle	3	123	0.00099	ENSP00000256442,ENSP00000265056,ENSP00000377536	CCNB1,MCM2,PTTG1
hsa03030	DNA replication	2	36	0.0022	ENSP00000265056,ENSP00000376272	MCM2,RFC4
hsa03460	Fanconi anemia pathway	2	51	0.0028	ENSP00000373952,ENSP00000418960	BRCA1,FANCA
hsa04115	p53 signaling pathway	2	68	0.0037	ENSP00000256442,ENSP00000415430	CCNB1,GTSE1
hsa04114	Oocyte meiosis	2	116	0.0082	ENSP00000256442,ENSP00000377536	CCNB1,PTTG1
hsa04218	Cellular senescence	2	156	0.0122	ENSP00000256442,ENSP00000342307	CCNB1,FOXM1
PPI enrichment
number of nodes:	12
number of edges:	52
average node degree:	8.67
avg. local clustering coefficient:	0.904
expected number of edges:	5
PPI enrichment p-value:	< 1.0e-16
