# Supplementary material for: Transcriptome profiling reveals Silibinin dose-dependent response network in non-small lung cancer cells
Source: PeerJ. 2020 Dec 16;8:e10373. doi: 10.7717/peerj.10373 (PMC7749657; doi:10.7717/peerj.10373)
Supplement: Supplemental Information 4 — Raw data of cell viability measurements of BRCA1, BIRC5 and FOXM1 knocked down NSCLC cell lines with and without Silibinin treatment of H1975, A549 and H838 NSCLC cell lines. [file peerj-08-10373-s004.xlsx]

## Sheet: BIRC5-H1975
						SINRA	10µM	0.7µl			PROBE	BIRC5
						lipofectamine		2µL			CELL LINE	H1975
											SEEDING	12000
BIRC5	CONDITIONS					CTB Fluorescence value				Mean	Median	STDEV	STDEV/Mean	Reduction	%Reduction	Z-Score	T-test	PVALUE
						Reading-1	Reading-2	Reading-3
	1	Lipo				36277	36226	35432		35978.3	36226	473.825	0.0131697
	2	Lipo+DRUG				20196	20399	20167		20254	20196	126.408	0.00624114	0.56295
	3	Scramble+Lipo				31976	31999	31488		31821	31976	288.616	0.00906997
	4	Scramble+Lipo+Drug				19876	20309	19482		19889	19876	413.653	0.0207981	0.625027
SiRNA-1	5	siRNA+Lipo				31982	31081	31407		31490	31407	456.198	0.0144871
SiRNA-1	6	siRNA+Lipo+Drug				18791	18491	18184		18488.7	18491	303.507	0.0164158	0.587128	-6.06362	-4.61385	-4.61385	0.0112362
SiRNA-2	7	siRNA+Lipo				31852	31168	31177		31399	31177	392.335	0.0124952
SiRNA-2	8	siRNA+Lipo+Drug				17974	16672	17493		17379.7	17493	658.357	0.0378809	0.55351	-11.4423	-6.06627	-3.81151	0.00825776
SiRNA-3	9	siRNA+Lipo				31077	31905	31805		31595.7	31805	451.953	0.0143043
SiRNA-3	10	siRNA+Lipo+Drug				17452	19092	18751		18431.7	18751	865.379	0.0469506	0.583361	-6.66641	-3.52308	-1.68404	0.0819562
		CTB Fluorescence value			STDEV
		Untreated	Drug treated		Untreated	Drug treated
Scramble+Lipo+Drug		31976	19876		288.616	413.653
siRNA2+Lipo+Drug		31177	17493		392.335	658.357
		CTB Fluorescence value			STDEV
		Untreated	Drug treated		Untreated	Drug treated
Scramble+Lipo+Drug		31976	19876		288.616	413.653
siRNA1+Lipo+Drug		31399	17379.7		456.198	303.507
		CTB Fluorescence value			STDEV
		Untreated	Drug treated		Untreated	Drug treated
Scramble+Lipo+Drug		31976	19876		288.616	413.653
siRNA3+Lipo+Drug		31595.7	18431.7		451.953	865.379

## Sheet: BIRC5-A549
				SINRA	10µM	0.7µl			PROBE	BIRC5
				lipofectamine		2µL			CELL LINE	A549
									SEEDING	12000
BIRC5	CONDITIONS			CTB Fluorescence value				Mean	Median	STDEV	STDEV/Mean	Reduction	% Reduction	Z-Score	t-Test	P value
				Reading-1	Reading-2	Reading-3
	Lipo			35989	34842	35032		35287.7	35032	614.757	0.0174213
	Lipo+DRUG			25360	26522	24723		25535	25360	912.178	0.0357227	0.723624
	Scramble+Lipo			29206	28919	28908		29011	28919	168.964	0.00582415
	Scramble+Lipo+Drug			21264	21264	21770		21432.7	21264	292.139	0.0136306	0.738777
siRNA-1	siRNA+Lipo			29942	29424	29640		29668.7	29640	260.187	0.00876976
siRNA-1	siRNA+Lipo+Drug			19082	19154	19259		19165	19154	89.0112	0.00464447	0.645968	-12.5626	-25.4762	-25.4762	0.00302552
siRNA-2	siRNA+Lipo			29775	29298	28941		29338	29298	418.436	0.0142626
siRNA-2	siRNA+Lipo+Drug			20282	20824	20715		20607	20715	286.686	0.0139121	0.7024	-4.92403	-2.88004	-2.88004	0.025048
siRNA-3	siRNA+Lipo			28456	29627	29405		29162.7	29405	621.976	0.0213278
siRNA-3	siRNA+Lipo+Drug			18208	17974	18562		18248	18208	296.034	0.0162228	0.625732	-15.3017	-10.9012	-10.7578	0.000186995
		CTB Fluorescence value			STDEV
		Untreated	Drug treated		Untreated	Drug treated
	Scramble+Lipo+Drug	29011	21432.7		168.964	292.139
	siRNA2+Lipo+Drug	29668.7	19165		260.187	89.0112
		CTB Fluorescence value			STDEV
		Untreated	Drug treated		Untreated	Drug treated
	Scramble+Lipo+Drug	29011	21432.7		168.964	292.139
	siRNA1+Lipo+Drug	29338	20607		418.436	286.686
		CTB Fluorescence value			STDEV
		Untreated	Drug treated		Untreated	Drug treated
	Scramble+Lipo+Drug	29011	21432.7		168.964	292.139
	siRNA3+Lipo+Drug	29162.7	18248		621.976	296.034

## Sheet: BIRC5-H838
				SINRA	10µM	0.7µl					PROBE		BIRC5
				lipofectamine		2µL					CELL LINE		H838
											SEEDING		12000
BIRC5	CONDITIONS			CTB Fluorescence value				Mean	Median	STDEV	STDEV/Mean	Reduction	% Reduction	Z-Score	t-Test	P value
				Reading-1	Reading-2	Reading-3
	Lipo			33775	32252	32370		32799	32370	847.297	0.025833
	Lipo+DRUG			21860	32209	21554		25207.7	21860	6065.26	0.240612	0.76855
	Scramble+Lipo			32094	33043	32767		32634.7	32767	488.144	0.0149578
	Scramble+Lipo+Drug			20568	21615	22441		21541.3	21615	938.671	0.0435753	0.660075
siRNA-1	siRNA+Lipo			32368	33079	33434		32960.3	33079	542.817	0.0164688
siRNA-1	siRNA+Lipo+Drug			21764	20765	21305		21278	21305	500.047	0.0235007	0.645564	-2.19843	-0.526617	-0.526617	0.696517
siRNA-2	siRNA+Lipo			31665	31938	31527		31710	31665	209.163	0.00659611
siRNA-2	siRNA+Lipo+Drug			21184	21190	21173		21182.3	21184	8.62168	0.000407022	0.668002	1.20085	-41.6392	-41.6392	0.575823
siRNA-3	siRNA+Lipo			32283	32519	32685.4		32495.8	32519	202.201	0.00622236
siRNA-3	siRNA+Lipo+Drug			21490	21558	21543		21530.3	21543	35.7258	0.00165932	0.662557	0.376054	-0.307901	-0.307901	0.985655
		CTB Fluorescence value			STDEV
		Untreated	Drug treated		Untreated	Drug treated
Scramble+Lipo+Drug		32634.7	21541.3		365.665	407.571
siRNA2+Lipo+Drug		32960.3	21278		899.843	361.233
		CTB Fluorescence value			STDEV
		Untreated	Drug treated		Untreated	Drug treated
Scramble+Lipo+Drug		32634.7	21541.3		365.665	407.571
siRNA1+Lipo+Drug		31710	21182.3		1011.97	585.441
		CTB Fluorescence value			STDEV
		Untreated	Drug treated		Untreated	Drug treated
Scramble+Lipo+Drug		32634.7	21541.3		365.665	407.571
siRNA3+Lipo+Drug		32495.8	21530.3		1455.66	337.159

## Sheet: FOXM1-H1975
				SINRA	10µM	0.7µl				FOXM1								PROBE
				lipofectamine		2µL				H1975								CELL LINE
FOXM1	CONDITIONS			CTB Fluorescence value				Mean	Median	STDEV	STDEV/Mean	REDUCTION	% Reduction	Z-Score	t-Test	P value
				Reading-1	Reading-2	Reading-3
	Lipo			36784	37931	36962		37225.7	36962	617.286	0.0165823
	Lipo+DRUG			20676	19103	18141		19306.7	19103	1279.71	0.0662835	0.518639
	Scramble+Lipo			35158	34431	35937		35175.3	35158	753.15	0.0214113
	Scramble+Lipo+Drug			23239	23421	24715		23791.7	23421	804.791	0.0338266	0.676374
siRNA-1	siRNA+Lipo			35142	35214	36142		35499.3	35214	557.729	0.015711
siRNA-1	siRNA+Lipo+Drug			20950	20339	21091		20793.3	20950	399.73	0.019224	0.585739	-13.4001	-7.50089	-7.50089	0.0109882
siRNA-2	siRNA+Lipo			36860	37365	36617		36947.3	36860	381.571	0.0103274
siRNA-2	siRNA+Lipo+Drug			22619	21795	21417		21943.7	21795	614.636	0.0280097	0.593917	-12.1909	-3.00666	-3.00666	0.0374869
siRNA-3	siRNA+Lipo			34240	35682	37077		35666.3	35682	1418.56	0.0397732
siRNA-3	siRNA+Lipo+Drug			21984	21904	20766		21551.3	21904	681.294	0.0316126	0.604249	-10.6635	-3.28835	-3.28835	0.0222242
		CTB Fluorescence value			STDEV
		Untreated	Drug treated		Untreated	Drug treated
Scramble+Lipo+Drug		35175.3	23791.7		753.15	804.791
siRNA1+Lipo+Drug		35214	20793.3		557.729	399.73
		CTB Fluorescence value			STDEV
		Untreated	Drug treated		Untreated	Drug treated
Scramble+Lipo+Drug		35175.3	23791.7		753.15	804.791
siRNA2+Lipo+Drug		36947.3	21943.7		381.571	614.636
		CTB Fluorescence value			STDEV
		Untreated	Drug treated		Untreated	Drug treated
Scramble+Lipo+Drug		35175.3	23791.7		753.15	804.791
siRNA3+Lipo+Drug		35666.3	21551.3		1418.56	681.294

## Sheet: FOXM1-A549
						SINRA	10µM	0.7µl			PROBE	FOXM1
						lipofectamine		2µL			CELL LINE	A549
											SEEDING	12000
FOXM1		CONDITIONS				CTB Fluorescence value				Mean	Median	STDEV	STDEV/Mean	Reduction	% Reduction	Z-Score	t-Test	P value
						Reading-1	Reading-2	Reading-3
	1	Lipo				32849	32970	31364		32394.3	32849	894.344	0.027608
	2	Lipo+DRUG				19642	20204	21415		20420.3	20204	906.081	0.0443715	0.630367
	3	Scramble+Lipo				30915	30127	30778		30606.7	30778	421.013	0.0137556
	4	Scramble+Lipo+Drug				18530	18707	19732		18989.7	18707	648.942	0.0341735	0.620442
PROBE-1	5	siRNA+Lipo				30529	29984	30438		30317	30438	291.954	0.00963003
PROBE-1	6	siRNA+Lipo+Drug				16073	15939	16031		16014.3	16031	68.5371	0.00427973	0.528229	-14.8624	-43.412	-43.412	0.0146894
PROBE-2	7	siRNA+Lipo				29809	32025	30221		30685	30221	1178.62	0.0384102
PROBE-2	8	siRNA+Lipo+Drug				15486	15561	14934		15327	15486	342.408	0.0223402	0.499495	-19.4937	-10.6968	-10.6968	0.00311807
PROBE-3	9	siRNA+Lipo				30125	31399	30271		30598.3	30271	697.23	0.0227865
PROBE-3	10	siRNA+Lipo+Drug				15005	15865	15123		15331	15123	466.206	0.0304094	0.50104	-19.2446	-7.84775	-7.84775	0.00203066
		CTB Fluorescence value			STDEV
		Untreated	Drug treated		Untreated	Drug treated
Scramble+Lipo+Drug		30606.7	18656.3		421.013	648.942
siRNA1+Lipo+Drug		30317	16014.3		291.954	68.5371
		CTB Fluorescence value			STDEV
		Untreated	Drug treated		Untreated	Drug treated
Scramble+Lipo+Drug		30606.7	18656.3		421.013	648.942
siRNA2+Lipo+Drug		30685	15327		1178.62	342.408
		CTB Fluorescence value			STDEV
		Untreated	Drug treated		Untreated	Drug treated
Scramble+Lipo+Drug		30606.7	18656.3		421.013	648.942
siRNA3+Lipo+Drug		30598.3	15331		697.23	466.206

## Sheet: FOXM1-H838
							SINRA	10µM	0.7µl			PROBE	FOXM1
							lipofectamine		2µL			CELL LINE	H838
												SEEDING	12000
	FOXM1		CONDITIONS				CTB Fluorescence value				Mean	Median	STDEV	STDEV/Mean	Reduction	% Reduction	Z-Score	t-Test	P value
							Reading-1	Reading-2	Reading-3
		1	Lipo				38609	38896	37860		38455	38609	534.893	0.0139096
		2	Lipo+DRUG				23870	23195	24555		23873.3	23870	680.006	0.0284839	0.620812
		3	Scramble+Lipo				36794	37975	36567		37112	36794	755.949	0.0203694
		4	Scramble+Lipo+Drug				21026	21123	19689		20612.7	21026	801.388	0.0388784	0.555418
	PROBE-1	5	siRNA+Lipo				38062	37457	36959		37492.7	37457	552.364	0.0147326
	PROBE-1	6	siRNA+Lipo+Drug				20428	19345	19587		19786.7	19587	568.439	0.0287284	0.527748	-4.98187	-1.4531	-1.4531	0.226511
	PROBE-2	7	siRNA+Lipo				38401	37881	37905		38062.3	37905	293.539	0.00771207
	PROBE-2	8	siRNA+Lipo+Drug				20129	20690	17167		19328.7	20129	1892.96	0.0979352	0.507816	-8.57043	-1.60222	-0.678304	0.366507
	PROBE-3	9	siRNA+Lipo				37118	36823	36253		36731.3	36823	439.725	0.0119714
	PROBE-3	10	siRNA+Lipo+Drug				18540	19120	19661		19107	19120	560.613	0.0293407	0.520183	-6.34392	-2.68575	-2.68575	0.0629443
		CTB values			Stdv
		Untreated	Drug treated		Untreated	Drug treated
Scramble+Lipo+Drug		36778.7	20946		755.949	801.388
siRNA1+Lipo+Drug		37492.7	19786.7		552.364	568.439
		CTB values			Stdv
		Untreated	Drug treated		Untreated	Drug treated
Scramble+Lipo+Drug		36778.7	20946		755.949	801.388
siRNA2+Lipo+Drug		38062.3	19328.7		293.539	1892.96
		CTB values			Stdv
		Untreated	Drug treated		Untreated	Drug treated
Scramble+Lipo+Drug		36778.7	20946		755.949	801.388
siRNA3+Lipo+Drug		36731.3	18773.7		1307.68	560

## Sheet: BRCA1-H1975
							SINRA	10µM	0.7µl			PROBE	BRCA1
							lipofectamine		2µL			CELL LINE	H1975
	FOXM1		CONDITIONS				CTB Fluorescence value				Mean	Median	STDEV	STDEV/Mean	Reduction	% Reduction	Z-Score	t-Test	P value
							Reading-1	Reading-2	Reading-3
		1	Lipo				41054	39950	40167		40390.3	40167	584.904	0.0144813
		2	Lipo+DRUG				22009	21997	21914		21973.3	21997	51.7333	0.00235437	0.544025
		3	Scramble+Lipo				37291	37430	37985		37568.7	37430	367.193	0.0097739
		4	Scramble+Lipo+Drug				22936	20333	21163		21477.3	21163	1329.66	0.0619101	0.571682
	PROBE-1	5	siRNA+Lipo				36223	36153	37109		36495	36223	532.89	0.0146017
	PROBE-1	6	siRNA+Lipo+Drug				20699	21948	21431		21359.3	21431	627.577	0.0293818	0.585267	2.37638	-0.188025	-0.188025	0.898686
	PROBE-2	7	siRNA+Lipo				35770	36631	37513		36638	36631	871.521	0.0237874
	PROBE-2	8	siRNA+Lipo+Drug				19932	21747	21576		21085	21576	1002.18	0.0475305	0.575495	0.667034	-0.391479	-0.391479	0.705583
	PROBE-3	9	siRNA+Lipo				37219	36663	34862		36248	36663	1232.08	0.0339904
	PROBE-3	10	siRNA+Lipo+Drug				20430	19685	19343		19819.3	19685	555.811	0.0280439	0.54677	-4.35761	-2.98303	-2.98303	0.151237
		CTB values			Stdv
		Untreated	Drug treated		Untreated	Drug treated
Scramble+Lipo+Drug		37568.7	21477.3		367.193	1329.66
siRNA1+Lipo+Drug		36495	21359.3		532.89	627.577
		CTB values			Stdv
		Untreated	Drug treated		Untreated	Drug treated
Scramble+Lipo+Drug		37568.7	21477.3		367.193	1329.66
siRNA2+Lipo+Drug		36638	21085		871.521	1002.18
		CTB values			Stdv
		Untreated	Drug treated		Untreated	Drug treated
Scramble+Lipo+Drug		37568.7	21477.3		367.193	1329.66
siRNA3+Lipo+Drug		36248	19819.3		1232.08	555.811

## Sheet: BRCA1-A549
							SINRA	10µM	0.7µl			PROBE	BRCA1
							lipofectamine		2µL			CELL LINE	A549
												SEEDING	12000
	FOXM1		CONDITIONS				CTB Fluorescence value				Mean	Median	STDEV	STDEV/Mean	Reduction	% Reduction	Z-Score	t-Test	P value
							Reading-1	Reading-2	Reading-3
		1	Lipo				30756	30260	30037		30351	30260	368.037	0.012126
		2	Lipo+DRUG				17244	17461	17301		17335.3	17301	112.5	0.00648966	0.571162
		3	Scramble+Lipo				30488	29468	30160		30038.7	30160	520.712	0.0173347
		4	Scramble+Lipo+Drug				20743	21619	21375		21245.7	21375	452.094	0.0212794	0.707277
	PROBE-1	5	siRNA+Lipo				32133	32494	33419		32682	32494	663.293	0.0202953
	PROBE-1	6	siRNA+Lipo+Drug				19702	19252	19995		19649.7	19702	374.254	0.0190463	0.601238	-14.9926	-4.26448	-4.26448	0.0100398
	PROBE-2	7	siRNA+Lipo				30465	30271	31368		30701.3	30465	585.442	0.0190689
	PROBE-2	8	siRNA+Lipo+Drug				15499	16083	16727		16103	16083	614.244	0.0381447	0.524505	-25.8417	-11.3752	-8.37235	0.000487978
	PROBE-3	9	siRNA+Lipo				29856	30646	29627		30043	29856	534.619	0.0177951
	PROBE-3	10	siRNA+Lipo+Drug				16299	16123	16917		16446.3	16299	417	0.0253552	0.547426	-22.6009	-11.5092	-11.5092	0.000180476
		CTB values			Stdv
		Untreated	Drug treated		Untreated	Drug treated
Scramble+Lipo+Drug		30038.7	21245.7		520.712	452.094
siRNA1+Lipo+Drug		32682	19649.7		663.293	374.254
		CTB values			Stdv
		Untreated	Drug treated		Untreated	Drug treated
Scramble+Lipo+Drug		30038.7	21245.7		520.712	452.094
siRNA2+Lipo+Drug		30701.3	16103		585.442	614.244
		CTB values			Stdv
		Untreated	Drug treated		Untreated	Drug treated
Scramble+Lipo+Drug		30038.7	21245.7		520.712	452.094
siRNA3+Lipo+Drug		30043	16446.3		534.619	417

## Sheet: BRCA1-H838
							SINRA	10µM	0.7µl			PROBE	BRCA1
							lipofectamine		2µL			CELL LINE	H838
	FOXM1		CONDITIONS				CTB Fluorescence value				Mean	Median	STDEV	STDEV/Mean	Reduction	% Reduction	Z-Score	t-Test	P value
							Reading-1	Reading-2	Reading-3
		1	Lipo				43176	46064	42064		43768	43176	2064.67	0.047173
		2	Lipo+DRUG				25933	27550	26374		26619	26374	835.877	0.0314015	0.608184
		3	Scramble+Lipo				44031	44458	46659		45049.3	44458	1410.27	0.0313049
		4	Scramble+Lipo+Drug				25684	24392	26026		25367.3	25684	861.799	0.0339728	0.563101
	PROBE-1	5	siRNA+Lipo				44216	45120	44396		44577.3	44396	478.503	0.0107342
	PROBE-1	6	siRNA+Lipo+Drug				24972	24127	24678		24592.3	24678	428.964	0.017443	0.551678	-2.02862	-1.80668	-1.80668	0.259435
	PROBE-2	7	siRNA+Lipo				44111	44667	45623		44800.3	44667	764.768	0.0170706
	PROBE-2	8	siRNA+Lipo+Drug				24221	24933	24390		24514.7	24390	372.011	0.015175	0.547198	-2.82416	-2.29205	-2.29205	0.222807
	PROBE-3	9	siRNA+Lipo				46425	45450	44944		45606.3	45450	752.775	0.0165059
	PROBE-3	10	siRNA+Lipo+Drug				21743	21970	22923		22212	21970	626.117	0.0281882	0.487038	-13.508	-5.03952	-5.03952	0.00871214
		CTB values			Stdv
		Untreated	Drug treated		Untreated	Drug treated
Scramble+Lipo+Drug		45049.3	25367.3		1410.27	861.799
siRNA1+Lipo+Drug		44577.3	24592.3		478.503	428.964
		CTB values			Stdv
		Untreated	Drug treated		Untreated	Drug treated
Scramble+Lipo+Drug		45049.3	25367.3		1410.27	861.799
siRNA2+Lipo+Drug		44800.3	24514.7		764.768	372.011
		CTB values			Stdv
		Untreated	Drug treated		Untreated	Drug treated
Scramble+Lipo+Drug		45049.3	25367.3		1410.27	861.799
siRNA3+Lipo+Drug		45606.3	22212		752.775	626.117
